# Supplementary material for: Human cancer tissues exhibit reduced A-to-I editing of miRNAs coupled with elevated editing of their targets
Source: Oxford University Press journal article supplement (doi:10.1093/nar/gkx1176), 2017-11-13
Supplement: gkx1176_supp.zip [file gkx1176_supp.zip]

Archive with 2 entries (2 files):
- nar-02917-a-2017-File009.pdf
- nar-02917-a-2017-File010.xlsx
