# Supplementary material for: Human cancer tissues exhibit reduced A-to-I editing of miRNAs coupled with elevated editing of their targets
Source: Oxford University Press journal article supplement (doi:10.1093/nar/gkx1176), 2017-11-13
Supplement: gkx1176_supp.zip [file gkx1176_supp.zip › nar-02917-a-2017-File010.xlsx]

## Sheet: Supplementary tables
Supplementary Tables
Table	Description
S1	Number of samples that were analyzed for microRNA editing per cancer and sample state
S2	Number of samples that were analyzed for target editing per cancer and sample state
S3	Averaged editing levels for each of the collected 129 in each tissue type.
S4	List of sites that exhibit differential editing levels
S5	p value and classification accuracy for the logistic regression model
S6	Prediction power information using leave-one-out cross validation
S7	Data for sites that exhibit significant difference in survival
S8	Targets for edited and unedited version of edited miRNAs
S9-S16	Ingenuity pathway analysis (IPA) output for the edited-only targets
S17	Genes that are targeted by the edited seed version only
s18	Targets-edited site that are differentially edited between normal and tumors and gained a novel miRNA recognition site as a result of the editing
s19	Targets-edited site that are differentially edited between normal and tumors and lost a miRNA recognition site as a result of the editing
s20	Fraction of targets that might be affected by target-editing per gene
s21	novel recognition sites that evolved from editing in both the miRNA and the target

## Sheet: Table S1
abbreviation	# of Tumors	# of Normal	Cancer
ACC	80	0	Adrenocortical carcinoma
BLCA	412	19	Bladder Urothelial Carcinoma
BRCA	1091	104	Breast invasive carcinoma
CESC	307	3	Cervical squamous cell carcinoma and endocervical adenocarcinoma
CHOL	36	9	Cholangiocarcinoma
COAD	451	8	Colon adenocarcinoma
DLBC	47	0	Lymphoid Neoplasm Diffuse Large B-cell Lymphoma
ESCA	184	13	Esophageal carcinoma
GBM	0	5	Glioblastoma multiforme
HNSC	523	44	Head and Neck squamous cell carcinoma
KICH	66	25	Kidney Chromophobe
KIRC	520	71	Kidney renal clear cell carcinoma
KIRP	291	34	Kidney renal papillary cell carcinoma
LAML	0	0	Acute Myeloid Leukemia
LGG	512	0	Brain Lower Grade Glioma
LIHC	372	50	Liver hepatocellular carcinoma
LUAD	516	46	Lung adenocarcinoma
LUSC	478	45	Lung squamous cell carcinoma
MESO	87	0	Mesothelioma
OV	489	0	Ovarian serous cystadenocarcinoma
PAAD	178	4	Pancreatic adenocarcinoma
PCPG	179	3	Pheochromocytoma and Paraganglioma
PRAD	498	52	Prostate adenocarcinoma
READ	161	3	Rectum adenocarcinoma
SARC	259	0	Sarcoma
SKCM	97	2	Skin Cutaneous Melanoma
STAD	436	41	Stomach adenocarcinoma
TGCT	150	0	Testicular Germ Cell Tumors
THCA	506	59	Thyroid carcinoma
THYM	124	2	Thymoma
UCEC	541	33	Uterine Corpus Endometrial Carcinoma
UCS	57	0	Uterine Carcinosarcoma
UVM	80	0	Uveal Melanoma

## Sheet: Table S2
Tissue	# of tumors	# of normal	Full name
BRCA	95	95	Breast invasive carcinoma
HNSC	29	29	Head and Neck squamous cell carcinoma
COAD	18	18	Colon adenocarcinoma
LUAD	36	36	Lung adenocarcinoma
BLCA	13	13	Bladder Urothelial Carcinoma
KIRC	62	62	Kidney renal clear cell carcinoma
PRAD	31	31	Prostate adenocarcinoma
THCA	42	42	Thyroid carcinoma
LIHC	31	31	Liver hepatocellular carcinoma

## Sheet: Table S3
RNA	Locus	EditType	LAML_TB.Edited	LAML_TB.OverallCount	LAML_TB.Ratio	LAML_TB.pval	LAML_TB.fdr	ACC_TP.Edited	ACC_TP.OverallCount	ACC_TP.Ratio	ACC_TP.pval	ACC_TP.fdr	BLCA_TP.Edited	BLCA_TP.OverallCount	BLCA_TP.Ratio	BLCA_TP.pval	BLCA_TP.fdr	BLCA_NT.Edited	BLCA_NT.OverallCount	BLCA_NT.Ratio	BLCA_NT.pval	BLCA_NT.fdr	LGG_TP.Edited	LGG_TP.OverallCount	LGG_TP.Ratio	LGG_TP.pval	LGG_TP.fdr	BRCA_TP.Edited	BRCA_TP.OverallCount	BRCA_TP.Ratio	BRCA_TP.pval	BRCA_TP.fdr	BRCA_NT.Edited	BRCA_NT.OverallCount	BRCA_NT.Ratio	BRCA_NT.pval	BRCA_NT.fdr	CESC_TP.Edited	CESC_TP.OverallCount	CESC_TP.Ratio	CESC_TP.pval	CESC_TP.fdr	CESC_NT.Edited	CESC_NT.OverallCount	CESC_NT.Ratio	CESC_NT.pval	CESC_NT.fdr	CHOL_TP.Edited	CHOL_TP.OverallCount
hsa-mir-381	52	AG	5543	23374	0.237144	0	0	365188	1192236	0.306305	0	0	86338	266994	0.323371	0	0	7577	25210	0.300555	0	0	274766	513466	0.53512	0	0	193248	447485	0.431854	0	0	38801	105283	0.36854	0	0	66499	184139	0.361135	0	0	4069	12897	0.3155	0	0	26493	62435
hsa-mir-1260b	18	AG	4105	4181	0.981823	0	0	2112	2144	0.985075	0	0	27163	27718	0.979977	0	0	957	970	0.986598	0	0	14478	14643	0.988732	0	0	41404	42043	0.984801	0	0	2362	2445	0.966053	0	0	18688	18915	0.987999	0	0	36	37	0.972973	3.664e-71	2.59961e-67	1097	1111
hsa-mir-625	58	AG	5209	57922	0.0899313	0	0	2429	35289	0.0688316	0	0	12344	179323	0.0688367	0	0	276	6347	0.0434851	1.09211e-87	7.74855e-84	21282	210181	0.101256	0	0	67277	452674	0.148621	0	0	1951	25123	0.0776579	0	0	12790	176934	0.0722868	0	0	41	992	0.0413306	8.50209e-14	6.03223e-10	761	7401
hsa-mir-589	66	AG	1061	3650	0.290685	0	0	3456	4855	0.711843	0	0	9030	14851	0.60804	0	0	125	179	0.698324	1.49896e-204	1.06351e-200	46638	54132	0.861561	0	0	34178	43306	0.789221	0	0	1235	1880	0.656915	0	0	4962	7819	0.634608	0	0	45	66	0.681818	7.24543e-74	5.14063e-70	699	976
hsa-mir-378b	53	AG	164	164	1	0	0	149	150	0.993333	1.4851e-296	1.05368e-292	2362	2368	0.997466	0	0	159	160	0.99375	1.58410000264764e-316	1.1239189518785e-312	415	415	1	0	0	1176	1180	0.99661	0	0	338	339	0.99705	0	0	1926	1932	0.996894	0	0	14	14	1	1e-28	7.095e-25	50	50
hsa-mir-411	20	AG	58	1341	0.0432513	9.62986e-20	6.83238e-16	3969	46317	0.0856921	0	0	4193	25689	0.163222	0	0	461	2381	0.193616	0	0	42050	90552	0.464374	0	0	8627	34460	0.250348	0	0	1269	5654	0.224443	0	0	2556	13028	0.196193	0	0	123	483	0.254658	1.20306e-130	8.53571e-127	597	2871
hsa-mir-98	32	AG	261	20179	0.0129342	3.35444e-05	0.237997	2228	55923	0.0398405	0	0	4874	208722	0.0233516	0	0	446	7175	0.0621603	4.2721e-198	3.03105e-194	28615	352460	0.0811865	0	0	15920	310662	0.0512454	0	0	3804	21001	0.181134	0	0	5854	106447	0.0549945	0	0	183	1620	0.112963	2.39526e-126	1.69944e-122	219	13451
hsa-mir-376a-1	49	AG	410	713	0.575035	0	0	8436	19451	0.433705	0	0	5047	7684	0.656819	0	0	392	494	0.793522	0	0	5084	7366	0.690198	0	0	4786	6206	0.771189	0	0	1075	1270	0.846457	0	0	2397	3128	0.766304	0	0	76	89	0.853933	1.23591e-137	8.76877e-134	589	879
hsa-mir-376a-2	55	AG	417	738	0.565041	0	0	8489	19350	0.438708	0	0	4970	7585	0.655241	0	0	397	506	0.784585	0	0	4980	7244	0.687465	0	0	5004	6412	0.780412	0	0	1034	1237	0.835893	0	0	2337	3099	0.754114	0	0	76	92	0.826087	2.69027e-135	1.90875e-131	589	890
hsa-mir-1304	57	AG	481	13369	0.0359788	6.08632e-121	4.31824e-117	269	4144	0.0649131	9.6833e-125	6.8703e-121	3652	59505	0.061373	0	0	43	813	0.0528905	3.84468e-18	2.7278e-14	2651	21701	0.12216	0	0	6072	53935	0.11258	0	0	245	3260	0.0751534	1.03048e-127	7.31126e-124	3176	43513	0.0729897	0	0	12	159	0.0754717	9.1654e-08	0.000650285	177	2129
hsa-mir-376c	48	AG	151	4816	0.0313538	8.25043e-33	5.85368e-29	6646	59975	0.110813	0	0	3748	29333	0.127774	0	0	266	1962	0.135576	1.57303e-203	1.11607e-199	9692	32200	0.300994	0	0	4238	20645	0.20528	0	0	753	3876	0.194272	0	0	1862	12456	0.149486	0	0	48	401	0.119701	1.19131e-35	8.45237e-32	524	3687
hsa-mir-497	83	AG	3	26	0.115385	0.00218876	1	131	630	0.207937	2.00125e-126	1.41989e-122	393	1369	0.287071	0	0	37	57	0.649123	9.95176e-60	7.06078e-56	868	5990	0.144908	0	0	1105	4277	0.258359	0	0	117	317	0.369085	2.83814e-146	2.01366e-142	232	1219	0.19032	6.74599e-213	4.78628e-209	11	26	0.423077	6.72977e-16	4.77477e-12	58	195
hsa-mir-3622a	52	AG	4	29	0.137931	0.000194461	1	2	17	0.117647	0.012309	1	93	557	0.166966	5.76699e-81	4.09168e-77	14	82	0.170732	1.16315e-13	8.25253e-10	6743	14451	0.466611	0	0	239	1097	0.217867	2.9741e-234	2.11013e-230	102	347	0.293948	7.66292e-116	5.43684e-112	98	503	0.194831	4.28346e-92	3.03911e-88	21	72	0.291667	4.73889e-25	3.36224e-21	1	16
hsa-mir-4510	20	AG	9	10	0.9	9.91e-18	7.03115e-14	28	30	0.933333	4.26641e-54	3.02702e-50	199	238	0.836134	0	0	71	84	0.845238	5.50162e-128	3.9034e-124	256	469	0.545842	0	0	376	417	0.901679	0	0	25	33	0.757576	1.28515e-43	9.11811e-40	146	180	0.811111	4.1246e-256	2.92641e-252	1	1	1	0.01	1	9	10
hsa-mir-376a-2	15	AG	17	190	0.0894737	1.43359e-11	1.01713e-07	208	1326	0.156863	6.31854e-173	4.483e-169	162	979	0.165475	5.50952e-139	3.90901e-135	6	30	0.2	4.83153e-07	0.00342797	267	719	0.371349	0	0	318	983	0.323499	0	0	66	228	0.289474	4.42774e-75	3.14148e-71	119	438	0.271689	3.29179e-130	2.33552e-126	3	6	0.5	1.95536e-05	0.138733	13	63
hsa-mir-6503	59	AG	2000	5903	0.338811	0	0	57	121	0.471074	8.36637e-80	5.93594e-76	399	996	0.400602	0	0	21	44	0.477273	1.61427e-30	1.14533e-26	190	382	0.497382	5.86413e-268	4.1606e-264	775	1588	0.488035	0	0	64	154	0.415584	6.72753e-85	4.77318e-81	242	608	0.398026	2.65548400064258e-310	1.88407e-306	0	3	0	1	1	31	76
hsa-mir-376a-1	9	AG	4	285	0.0140351	0.319034	1	241	10558	0.0228263	5.06916e-30	3.59657e-26	159	3990	0.0398496	1.25333e-46	8.89239e-43	19	190	0.1	1.25794e-13	8.92507e-10	3234	13638	0.237132	0	0	406	4359	0.0931406	3.03835e-245	2.15571e-241	69	708	0.0974576	1.52745e-44	1.08372e-40	113	1417	0.0797459	1.33314e-62	9.45862e-59	10	35	0.285714	1.46137e-12	1.03685e-08	24	243
hsa-mir-539	18	AG	28	3473	0.00806219	0.894435	1	1765	164185	0.0107501	0.0013071	1	337	12605	0.0267354	2.80616e-55	1.99097e-51	13	613	0.0212072	0.0100163	1	7311	94065	0.0777229	0	0	1489	36199	0.0411337	0	0	294	7259	0.0405014	3.61275e-86	2.56325e-82	140	4621	0.0302965	4.15797e-29	2.95008e-25	9	156	0.0576923	3.18597e-05	0.226045	87	3052
hsa-let-7c	27	AG	52602	191714	0.274377	0	0	48265	956745	0.0504471	0	0	94828	2819295	0.0336354	0	0	2793	550196	0.00507637	1	1	265560	36701484	0.00723567	1	1	345691	12392036	0.0278962	0	0	40273	3483695	0.0115604	1.0107e-179	7.17088e-176	84713	6727193	0.0125926	0	0	2584	363690	0.00710495	1	1	12110	312856
hsa-mir-378c	31	AG	122	2830	0.0431095	1.83312e-39	1.3006e-35	128	2625	0.0487619	7.77489e-47	5.51628e-43	457	19515	0.0234179	3.75757e-58	2.66599e-54	59	1747	0.0337722	3.15762e-15	2.24033e-11	156	3773	0.0413464	1.01364e-47	7.19179e-44	272	16574	0.0164112	1.83987e-14	1.30539e-10	88	4985	0.017653	5.77672e-07	0.00409858	340	15028	0.0226244	7.89983e-41	5.60493e-37	4	163	0.0245399	0.0820262	1	13	664
hsa-mir-3157	70	AG	15	665	0.0225564	0.00345524	1	1	57	0.0175439	0.436095	1	54	556	0.0971223	3.68183e-35	2.61226e-31	10	29	0.344828	1.68413e-13	1.19489e-09	136	1659	0.0819771	1.85538e-76	1.31639e-72	91	746	0.121984	9.4409e-67	6.69832e-63	14	177	0.079096	4.37147e-09	3.10156e-05	36	382	0.0942408	1.50298e-23	1.06637e-19	2	5	0.4	0.00098015	1	4	42
hsa-mir-151a	49	AG	481	66527	0.00723015	1	1	10373	584972	0.0177325	0	0	41309	5157967	0.00800878	1	1	2065	170032	0.0121448	4.28701e-18	3.04163e-14	173600	3645999	0.0476138	0	0	148556	6933960	0.0214244	0	0	7803	490479	0.0159089	3.89323728922902e-321	2.76225185670799e-317	21345	2486963	0.00858276	1	1	641	42060	0.0152401	6.68909e-24	4.74591e-20	3728	231511
hsa-mir-379	10	AG	306	102959	0.00297206	1	1	20222	3652194	0.00553695	1	1	19401	2354162	0.00824115	1	1	2018	239224	0.00843561	1	1	517739	6700242	0.0772717	0	0	58467	3595613	0.0162606	0	0	11220	710261	0.015797	0	0	11375	1183934	0.0096078	0.999992	1	874	51209	0.0170673	1.62772e-48	1.15487e-44	2831	236505
hsa-mir-421	61	AG	10	989	0.0101112	0.5288	1	38	3523	0.0107863	0.341695	1	245	14938	0.0164011	3.59769e-13	2.55256e-09	29	472	0.0614407	2.25191e-14	1.59773e-10	607	35201	0.0172438	1.90996e-35	1.35512e-31	556	13591	0.0409094	5.56163e-163	3.94598e-159	14	669	0.0209268	0.00862785	1	101	6297	0.0160394	5.58379e-06	0.039617	0	47	0	1	1	5	579
hsa-mir-556	60	AG	3	97	0.0309278	0.07394	1	10	112	0.0892857	2.23799e-07	0.00158785	70	1132	0.0618375	1.51451e-32	1.07454e-28	0	5	0	1	1	137	1360	0.100735	1.65013e-88	1.17077e-84	330	2156	0.153061	1.47599e-269	1.04721e-265	2	50	0.04	0.0894353	1	60	795	0.0754717	9.07718e-33	6.44026e-29	0	0	0			8	65
hsa-mir-301b	64	AG	3	447	0.00671141	0.824436	1	16	573	0.0279232	0.000285779	1	166	8107	0.0204761	6.29269e-17	4.46466e-13	0	24	0	1	1	553	4411	0.125368	0	0	220	3577	0.0615041	7.05576e-98	5.00606e-94	4	48	0.0833333	0.0013701	1	59	2208	0.026721	4.23832e-11	3.00709e-07	0	2	0	1	1	11	174
hsa-mir-378a	58	AG	448	264221	0.00169555	1	1	651	185146	0.00351614	1	1	41711	1436354	0.0290395	0	0	44993	139788	0.321866	0	0	5345	298522	0.0179049	0	0	7699	754068	0.01021	0.0342113	1	3378	248178	0.0136112	4.17685e-66	2.96347e-62	4722	900432	0.00524415	1	1	306	7854	0.038961	1.21022e-85	8.58649e-82	235	42754
hsa-mir-561	69	AG	0	0	0			7	35	0.2	5.26013e-08	0.000373206	16	56	0.285714	2.8539e-19	2.02484e-15	0	1	0	1	1	1	15	0.0666667	0.139942	1	13	78	0.166667	1.20355e-12	8.53919e-09	0	10	0	1	1	27	83	0.325301	2.96263e-33	2.10199e-29	0	0	0			4	27
hsa-mir-664a	18	AG	13	1568	0.00829082	0.786187	1	61	4558	0.0133831	0.0162491	1	91	7009	0.0129833	0.00904933	1	10	403	0.0248139	0.0081975	1	938	15394	0.0609328	0	0	655	23427	0.0279592	9.24387e-114	6.55853e-110	81	2472	0.032767	1.63141e-19	1.15748e-15	49	3632	0.0134912	0.0251092	1	1	129	0.00775194	0.726511	1	9	540
hsa-mir-99a	13	AG	168	53314	0.00315114	1	1	2518	373293	0.00674537	1	1	13402	758270	0.0176744	0	0	2808	131322	0.0213826	5.9097e-284	4.19293e-280	148381	14528968	0.0102128	2.29806e-16	1.63048e-12	45918	4171843	0.0110066	3.26281e-92	2.31496e-88	15371	1517361	0.0101301	0.0543197	1	9684	2159052	0.0044853	1	1	2945	200899	0.0146591	5.26386e-86	3.73471e-82	882	108326
hsa-mir-605	54	AG	0	1	0	1	1	4	5	0.8	4.96e-08	0.000351912	5	8	0.625	5.4612e-09	3.87472e-05	0	0	0			0	1	0	1	1	14	17	0.823529	6.61138e-26	4.69077e-22	0	3	0	1	1	2	4	0.5	0.00059203	1	0	0	0			0	0
hsa-mir-497	25	AG	11	2860	0.00384615	0.999946	1	78	17843	0.00437146	1	1	1297	59631	0.0217504	1.28401e-137	9.11007e-134	244	4931	0.0494829	8.09329e-89	5.74219e-85	2818	260925	0.0108	2.57898e-05	0.182978	1770	231540	0.00764447	1	1	477	58974	0.00808831	0.999999	1	247	48010	0.00514476	1	1	55	3432	0.0160256	0.000652691	1	75	8735
hsa-mir-624	58	AG	10	73	0.136986	3.49993e-09	2.4832e-05	2	4	0.5	0.00059203	1	14	67	0.208955	5.95687e-15	4.2264e-11	0	0	0			15	64	0.234375	1.00589e-16	7.13677e-13	43	136	0.316176	2.10093e-51	1.49061e-47	3	11	0.272727	0.000155373	1	10	78	0.128205	6.77334e-09	4.80568e-05	0	1	0	1	1	3	8
hsa-mir-1251	10	AG	0	0	0			19	868	0.0218894	0.00154172	1	25	4858	0.00514615	0.999931	1	0	11	0	1	1	4938	44623	0.11066	0	0	136	8462	0.0160719	1.45796e-07	0.00103443	3	74	0.0405405	0.0383591	1	5	338	0.0147929	0.251528	1	0	0	0			2	229
hsa-mir-200b	61	AG	6	1068	0.00561798	0.955405	1	60	2551	0.0235202	3.4172e-09	2.4245e-05	26930	4043699	0.00665974	1	1	258	55840	0.00462034	1	1	336	8245	0.040752	6.93833e-99	4.92274e-95	67475	3273901	0.02061	0	0	700	95043	0.00736509	1	1	14887	2296858	0.00648146	1	1	19	3711	0.00511991	0.999623	1	4012	213387
hsa-mir-3681	10	AG	0	39	0	1	1	9	110	0.0818182	1.87146e-06	0.013278	7	162	0.0432099	0.00132568	1	1	8	0.125	0.0772553	1	73	814	0.0896806	1.55406e-44	1.1026e-40	15	350	0.0428571	3.56103e-06	0.0252655	0	23	0	1	1	8	245	0.0326531	0.0035675	1	0	1	0	1	1	0	17
hsa-mir-337	66	AG	32	6275	0.0050996	0.999994	1	582	78319	0.00743115	1	1	574	76883	0.00746589	1	1	64	7967	0.00803314	0.969147	1	2384	56801	0.0419711	0	0	2227	129476	0.0172001	1.47038e-123	1.04323e-119	473	47179	0.0100256	0.483886	1	353	36370	0.0097058	0.720599	1	8	1190	0.00672269	0.907153	1	84	6647
hsa-mir-381	55	AG	84	24110	0.00348403	1	1	13882	1362205	0.0101908	0.0129203	1	2610	294231	0.00887058	1	1	193	27229	0.00708803	1	1	7942	541946	0.0146546	8.48873e-228	6.02276e-224	4986	470810	0.0105903	2.82474e-05	0.200415	849	107276	0.00791417	1	1	1931	197746	0.00976505	0.855845	1	111	13468	0.00824176	0.984088	1	1106	75792
hsa-mir-4662a	8	AG	3	2840	0.00105634	1	1	85	21234	0.00400301	1	1	208	63452	0.00327807	1	1	16	1406	0.0113798	0.336117	1	387	43768	0.00884208	0.993801	1	603	125509	0.00480444	1	1	84	9874	0.00850719	0.941376	1	136	47655	0.00285385	1	1	3	260	0.0115385	0.482327	1	12	1344
hsa-mir-944	59	AG	0	461	0	1	1	0	132	0	1	1	1570	217319	0.0072244	1	1	7	2984	0.00234584	1	1	8	656	0.0121951	0.335709	1	180	11941	0.0150741	1.24951e-07	0.00088653	9	2641	0.0034078	0.999974	1	2044	215828	0.0094705	0.993822	1	0	16	0	1	1	0	114
hsa-mir-377	54	AG	1	353	0.00283286	0.971211	1	36	8357	0.00430777	1	1	23	3901	0.00589592	0.997861	1	2	214	0.00934579	0.632006	1	208	5010	0.041517	2.79413e-63	1.98244e-59	38	4149	0.00915883	0.728027	1	3	720	0.00416667	0.975028	1	8	2002	0.003996	0.999265	1	1	41	0.0243902	0.337718	1	2	799
hsa-mir-455	32	AG	1	239	0.0041841	0.909466	1	67	24356	0.00275086	1	1	234	83747	0.00279413	1	1	12	2192	0.00547445	0.992267	1	314	35955	0.00873314	0.993549	1	564	111130	0.00507514	1	1	59	6643	0.00888153	0.835845	1	297	101855	0.00291591	1	1	32	2601	0.012303	0.140419	1	55	13053
hsa-mir-24-2	18	AG	7	11432	0.000612316	1	1	27	7610	0.00354796	1	1	212	78236	0.00270975	1	1	35	1780	0.0196629	0.000186325	1	185	34879	0.00530405	1	1	403	110034	0.0036625	1	1	61	11379	0.00536075	1	1	98	57435	0.00170628	1	1	7	305	0.0229508	0.0353096	1	12	5128
hsa-mir-1301	52	AG	8	4528	0.00176678	1	1	56	17903	0.00312797	1	1	95	31079	0.00305673	1	1	1	399	0.00250627	0.981868	1	1773	70907	0.0250046	1.122e-249	7.9606e-246	377	69690	0.00540967	1	1	5	1872	0.00267094	0.999955	1	47	20926	0.00224601	1	1	0	128	0	1	1	12	1776
hsa-mir-130b	71	AG	7	17302	0.000404578	1	1	7	3653	0.00191623	1	1	106	91095	0.00116362	1	1	4	637	0.00627943	0.880132	1	471	55526	0.00848251	0.999894	1	201	49344	0.00407344	1	1	7	1628	0.00429975	0.996779	1	47	49032	0.000958558	1	1	0	65	0	1	1	7	2617
hsa-mir-488	56	AG	0	25	0	1	1	16	3990	0.00401003	0.999995	1	0	474	0	1	1	0	12	0	1	1	842	75574	0.0111414	0.00101744	1	3	1319	0.00227445	0.99982	1	0	219	0	1	1	1	267	0.00374532	0.931672	1	0	13	0	1	1	1	22
hsa-mir-503	7	AG	4	5335	0.000749766	1	1	439	274154	0.00160129	1	1	133	23028	0.00577558	1	1	16	206	0.0776699	4.61288e-10	3.27284e-06	195	24612	0.00792296	0.999689	1	520	60019	0.00866392	0.999639	1	18	1983	0.00907716	0.691004	1	156	20863	0.00747735	0.999943	1	3	122	0.0245902	0.124013	1	9	968
hsa-mir-421	54	AG	0	1000	0	1	1	10	3421	0.00292312	1	1	51	14431	0.00353406	1	1	0	450	0	1	1	222	33309	0.00666487	1	1	121	13909	0.0086994	0.945971	1	1	721	0.00138696	0.999287	1	25	6263	0.0039917	1	1	0	42	0	1	1	3	577
hsa-mir-376b	67	AG	5	254	0.019685	0.113224	1	63	16238	0.00387979	1	1	15	6282	0.00238777	1	1	1	275	0.00363636	0.936951	1	44	4326	0.0101711	0.475424	1	18	3073	0.00585747	0.99502	1	1	411	0.00243309	0.983928	1	5	2175	0.00229885	0.999996	1	0	58	0	1	1	3	575
hsa-mir-3167	62	AG	0	0	0			0	0	0			1	6	0.166667	0.0585199	1	0	0	0			5	84	0.0595238	0.00160426	1	0	6	0	1	1	0	2	0	1	1	0	4	0	1	1	0	0	0			0	1
hsa-mir-99b	47	AG	6	5054	0.00118718	1	1	258	132593	0.0019458	1	1	433	281746	0.00153685	1	1	18	6966	0.00258398	1	1	1616	285111	0.00566797	1	1	1596	485944	0.00328433	1	1	121	34216	0.00353636	1	1	176	131688	0.00133649	1	1	6	2262	0.00265252	0.999991	1	24	13104
hsa-let-7e	57	AG	0	1925	0	1	1	51	13756	0.00370747	1	1	116	51607	0.00224776	1	1	13	3388	0.00383707	0.999987	1	649	73367	0.00884594	0.999354	1	389	77185	0.00503984	1	1	40	10063	0.00397496	1	1	63	24518	0.00256954	1	1	3	991	0.00302725	0.997114	1	7	2173
hsa-mir-27a	56	AG	243	513123	0.000473571	1	1	956	315786	0.00302737	1	1	4746	4929019	0.000962869	1	1	141	128723	0.00109538	1	1	5608	1234875	0.00454135	1	1	11141	4707821	0.00236649	1	1	560	301217	0.00185912	1	1	4260	4513246	0.000943888	1	1	33	28415	0.00116136	1	1	822	368137
hsa-mir-27a	10	AG	36	16879	0.00213283	1	1	17	1030	0.0165049	0.0334208	1	177	30455	0.00581185	1	1	15	3465	0.004329	0.999944	1	80	5459	0.0146547	0.000703544	1	497	54090	0.00918839	0.973716	1	78	14763	0.00528348	1	1	206	49057	0.0041992	1	1	2	349	0.00573066	0.864379	1	21	1341
hsa-mir-301a	70	AG	2	2984	0.000670241	1	1	6	8446	0.000710395	1	1	45	41158	0.00109335	1	1	3	362	0.00828729	0.702207	1	101	74526	0.00135523	1	1	56	43200	0.0012963	1	1	4	1443	0.002772	0.99968	1	10	18986	0.000526704	1	1	0	117	0	1	1	6	1355
hsa-mir-425	20	AG	73	707387	0.000103197	1	1	3	87701	3.42071e-05	1	1	184	1085871	0.000169449	1	1	3	11849	0.000253186	1	1	42	402876	0.00010425	1	1	199	1561754	0.000127421	1	1	22	94575	0.00023262	1	1	63	478784	0.000131583	1	1	0	1180	0	1	1	0	22627
hsa-mir-653	59	AG	0	4	0	1	1	0	207	0	1	1	0	758	0	1	1	0	12	0	1	1	0	410	0	1	1	0	2948	0	1	1	0	230	0	1	1	0	314	0	1	1	0	0	0			0	73
hsa-mir-148b	37	AG	9	1512	0.00595238	0.965476	1	9	1887	0.00476948	0.995945	1	31	6740	0.00459941	1	1	1	106	0.00943396	0.655388	1	67	4338	0.0154449	0.000492783	1	79	9334	0.00846368	0.941758	1	1	302	0.00331126	0.951935	1	18	3987	0.00451467	0.999965	1	2	22	0.0909091	0.0202293	1	3	435
hsa-mir-425	23	AG	45	612787	7.3435e-05	1	1	7	85112	8.22446e-05	1	1	59	1053878	5.59837e-05	1	1	0	11724	0	1	1	23	389130	5.91062e-05	1	1	108	1490354	7.2466e-05	1	1	14	95567	0.000146494	1	1	18	461731	3.89837e-05	1	1	0	1105	0	1	1	0	22272
hsa-mir-1304	31	AG	0	136	0	1	1	0	140	0	1	1	0	1235	0	1	1	0	23	0	1	1	0	686	0	1	1	1	780	0.00128205	0.999606	1	0	66	0	1	1	0	801	0	1	1	0	6	0	1	1	0	45
hsa-mir-378a	16	AG	13	27044	0.000480698	1	1	6	29901	0.000200662	1	1	102	302313	0.000337399	1	1	20	20403	0.000980248	1	1	44	74489	0.000590691	1	1	67	209147	0.000320349	1	1	42	105231	0.000399122	1	1	61	204663	0.000298051	1	1	0	1697	0	1	1	5	9411
hsa-mir-1254-1	18	AG	1	452	0.00221239	0.989356	1	0	487	0	1	1	2	1237	0.00161681	0.999946	1	0	10	0	1	1	3	815	0.00368098	0.988062	1	7	2097	0.0033381	0.99988	1	0	70	0	1	1	4	929	0.00430571	0.983112	1	0	4	0	1	1	0	39
hsa-mir-485	23	AG	0	55	0	1	1	0	3754	0	1	1	0	705	0	1	1	0	69	0	1	1	0	6160	0	1	1	0	1060	0	1	1	0	176	0	1	1	0	359	0	1	1	0	10	0	1	1	0	72
hsa-mir-607	80	AG	0	44	0	1	1	0	185	0	1	1	0	224	0	1	1	0	8	0	1	1	0	1383	0	1	1	0	456	0	1	1	0	171	0	1	1	0	282	0	1	1	0	2	0	1	1	0	9
hsa-mir-100	13	AG	633	2642643	0.000239533	1	1	626	1472897	0.000425013	1	1	6417	11142389	0.000575909	1	1	1238	1769046	0.000699812	1	1	30091	63718523	0.000472249	1	1	9400	23246469	0.000404362	1	1	2578	7631764	0.000337799	1	1	1960	6957015	0.00028173	1	1	274	880823	0.000311073	1	1	504	1644256
hsa-mir-607	77	AG	0	25	0	1	1	0	76	0	1	1	0	158	0	1	1	0	3	0	1	1	0	746	0	1	1	0	301	0	1	1	0	57	0	1	1	0	161	0	1	1	0	2	0	1	1	0	3
hsa-mir-607	66	AG	0	17	0	1	1	0	61	0	1	1	0	130	0	1	1	0	3	0	1	1	2	627	0.00318979	0.986555	1	1	271	0.00369004	0.934365	1	0	48	0	1	1	0	121	0	1	1	0	1	0	1	1	0	0
hsa-mir-142	19	AG	28	231416	0.000120994	1	1	2	7275	0.000274914	1	1	12	163422	7.34295e-05	1	1	3	5822	0.000515287	1	1	3	38479	7.79646e-05	1	1	21	305416	6.87587e-05	1	1	1	11676	8.56458e-05	1	1	24	205303	0.0001169	1	1	0	226	0	1	1	0	18164
hsa-mir-130b	66	AG	4	17156	0.000233155	1	1	0	3984	0	1	1	5	101487	4.92674e-05	1	1	0	690	0	1	1	40	61657	0.00064875	1	1	20	55564	0.000359945	1	1	3	1881	0.0015949	0.999999	1	0	55186	0	1	1	0	71	0	1	1	0	2870
hsa-mir-641	18	AG	0	22	0	1	1	0	37	0	1	1	0	139	0	1	1	0	3	0	1	1	5	345	0.0144928	0.264628	1	1	141	0.0070922	0.757583	1	0	11	0	1	1	1	97	0.0103093	0.622763	1	1	2	0.5	0.0199	1	0	6
hsa-mir-181a-2	59	AG	472	1063353	0.000443879	1	1	84	820965	0.000102319	1	1	367	1047134	0.00035048	1	1	12	35758	0.000335589	1	1	2643	7844885	0.000336907	1	1	896	2366517	0.000378615	1	1	53	147493	0.000359339	1	1	247	668355	0.000369564	1	1	1	9031	0.00011073	1	1	55	246531
hsa-mir-641	17	AG	0	19	0	1	1	0	34	0	1	1	0	130	0	1	1	0	3	0	1	1	3	341	0.00879765	0.663546	1	0	126	0	1	1	0	10	0	1	1	0	93	0	1	1	0	2	0	1	1	0	7
hsa-mir-219a-2	76	AG	0	198	0	1	1	0	194	0	1	1	0	515	0	1	1	0	18	0	1	1	1643	11968649	0.000137275	1	1	0	708	0	1	1	0	36	0	1	1	0	825	0	1	1	0	0	0			0	27
hsa-mir-138-1	74	AG	0	26	0	1	1	0	103	0	1	1	0	1790	0	1	1	0	16	0	1	1	41	15963	0.00256844	1	1	0	706	0	1	1	0	51	0	1	1	0	755	0	1	1	0	2	0	1	1	0	26
hsa-mir-3162	19	AG	0	7	0	1	1	0	11	0	1	1	0	23	0	1	1	0	3	0	1	1	0	5	0	1	1	0	30	0	1	1	0	3	0	1	1	0	22	0	1	1	0	0	0			0	1
hsa-mir-340	70	AG	22	12782	0.00172117	1	1	17	3842	0.00442478	0.999965	1	55	11701	0.00470045	1	1	6	558	0.0107527	0.485237	1	385	71354	0.00539563	1	1	215	34991	0.00614444	1	1	10	1984	0.00504032	0.994689	1	34	8840	0.00384615	1	1	2	78	0.025641	0.183637	1	6	1833
hsa-mir-376b	74	AG	0	240	0	1	1	4	15873	0.000252	1	1	2	6225	0.000321285	1	1	0	293	0	1	1	1	4376	0.000228519	1	1	5	3170	0.00157729	1	1	0	424	0	1	1	2	2094	0.00095511	1	1	0	64	0	1	1	1	613
hsa-mir-1304	62	AG	3	13023	0.000230362	1	1	0	4406	0	1	1	13	62499	0.000208003	1	1	1	807	0.00123916	0.9997	1	5	24595	0.000203293	1	1	24	55976	0.000428755	1	1	2	3274	0.000610874	1	1	3	45161	6.6429e-05	1	1	0	154	0	1	1	1	2418
hsa-mir-142	55	AG	30883	12121340	0.00254782	1	1	31	197836	0.000156695	1	1	584	2333574	0.00025026	1	1	12	46409	0.000258571	1	1	169	824625	0.000204942	1	1	1689	8963622	0.000188428	1	1	49	289561	0.000169222	1	1	790	3388092	0.00023317	1	1	0	3265	0	1	1	53	278931
hsa-mir-27b	64	AG	7	88593	7.9013e-05	1	1	188	389053	0.000483225	1	1	2237	5413415	0.000413233	1	1	151	342400	0.000441005	1	1	3319	3332913	0.000995826	1	1	2659	3754243	0.000708265	1	1	178	355033	0.000501362	1	1	2463	5596427	0.000440102	1	1	44	131574	0.000334413	1	1	273	526341
hsa-mir-548aa-2	57	AG	0	5	0	1	1	0	1	0	1	1	0	5	0	1	1	0	0	0			0	4	0	1	1	0	6	0	1	1	0	0	0			0	8	0	1	1	0	0	0			0	0
hsa-mir-548aa-2	58	AG	0	5	0	1	1	0	1	0	1	1	0	5	0	1	1	0	0	0			0	4	0	1	1	0	8	0	1	1	0	0	0			0	8	0	1	1	0	0	0			0	0
hsa-mir-455	17	AG	0	211	0	1	1	0	15501	0	1	1	7	54677	0.000128025	1	1	0	1356	0	1	1	6	26897	0.000223073	1	1	15	86422	0.000173567	1	1	0	5362	0	1	1	11	72609	0.000151496	1	1	3	1924	0.00155925	0.999999	1	3	8065
hsa-mir-548aa-2	64	AG	0	5	0	1	1	0	1	0	1	1	0	5	0	1	1	0	0	0			0	6	0	1	1	0	9	0	1	1	0	0	0			0	8	0	1	1	0	0	0			0	0
hsa-let-7g	14	AG	301	444092	0.000677787	1	1	269	456566	0.000589181	1	1	952	1350478	0.000704936	1	1	59	46313	0.00127394	1	1	3132	2055001	0.00152409	1	1	1832	2309927	0.000793099	1	1	141	208454	0.000676408	1	1	583	987834	0.00059018	1	1	18	12062	0.00149229	1	1	92	119765
hsa-mir-889	62	AG	4	3057	0.00130847	1	1	391	414826	0.000942564	1	1	88	66192	0.00132947	1	1	2	3663	0.000546001	1	1	1281	194572	0.00658368	1	1	152	62560	0.00242967	1	1	10	6484	0.00154226	1	1	46	26199	0.00175579	1	1	3	584	0.00513699	0.931452	1	27	10950
hsa-let-7g	11	AG	180	487993	0.000368858	1	1	68	425154	0.000159942	1	1	291	1318624	0.000220685	1	1	19	46032	0.000412756	1	1	781	1973550	0.000395734	1	1	526	2299618	0.000228734	1	1	53	209268	0.000253264	1	1	197	946795	0.00020807	1	1	4	11880	0.0003367	1	1	24	107477
hsa-mir-374b	21	AG	11	34429	0.000319498	1	1	25	44361	0.000563558	1	1	138	170671	0.000808573	1	1	22	12791	0.00171996	1	1	551	503602	0.00109412	1	1	276	229237	0.00120399	1	1	14	29370	0.000476677	1	1	82	103900	0.00078922	1	1	2	2227	0.000898069	1	1	21	18444
hsa-mir-600	72	AG	0	2	0	1	1	0	2	0	1	1	0	11	0	1	1	0	0	0			0	2	0	1	1	0	45	0	1	1	0	0	0			0	13	0	1	1	0	0	0			0	1
hsa-mir-27a	17	AG	2	17214	0.000116185	1	1	0	1702	0	1	1	9	45642	0.000197187	1	1	2	5288	0.000378215	1	1	5	7160	0.000698324	1	1	13	66398	0.000195789	1	1	2	16475	0.000121396	1	1	9	67241	0.000133847	1	1	2	436	0.00458716	0.932444	1	1	2308
hsa-mir-153-2	59	AG	0	635	0	1	1	0	3545	0	1	1	0	1345	0	1	1	0	46	0	1	1	8	108146	7.39741e-05	1	1	1	12093	8.26925e-05	1	1	0	599	0	1	1	0	1292	0	1	1	0	22	0	1	1	0	181
hsa-let-7d	10	AG	18	141983	0.000126776	1	1	2	103096	1.93994e-05	1	1	32	457384	6.99631e-05	1	1	0	14841	0	1	1	55	621462	8.8501e-05	1	1	84	830921	0.000101093	1	1	9	61999	0.000145164	1	1	16	373497	4.28384e-05	1	1	1	4561	0.00021925	1	1	0	25098
hsa-mir-197	14	AG	0	70	0	1	1	0	31	0	1	1	0	327	0	1	1	0	5	0	1	1	4	260	0.0153846	0.263558	1	3	292	0.010274	0.559713	1	0	15	0	1	1	0	184	0	1	1	0	0	0			0	9
hsa-mir-561	80	AG	0	0	0			0	30	0	1	1	0	37	0	1	1	0	0	0			0	11	0	1	1	0	43	0	1	1	0	4	0	1	1	0	63	0	1	1	0	0	0			1	11
hsa-mir-142	20	AG	30	242674	0.000123623	1	1	1	7898	0.000126614	1	1	41	169520	0.000241859	1	1	1	6255	0.000159872	1	1	0	38426	0	1	1	30	324316	9.25024e-05	1	1	0	13147	0	1	1	33	217425	0.000151776	1	1	0	240	0	1	1	12	19052
hsa-mir-3679	22	AG	0	2	0	1	1	0	18	0	1	1	1	161	0.00621118	0.801726	1	0	1	0	1	1	0	59	0	1	1	1	46	0.0217391	0.370176	1	0	1	0	1	1	0	66	0	1	1	0	0	0			0	7
hsa-let-7d	66	AG	208	300166	0.00069295	1	1	347	338972	0.00102368	1	1	984	772835	0.00127323	1	1	125	36902	0.00338735	1	1	3073	720552	0.00426479	1	1	2157	1163600	0.00185373	1	1	240	142653	0.0016824	1	1	655	524151	0.00124964	1	1	14	5861	0.00238867	1	1	127	60550
hsa-mir-153-1	60	AG	0	596	0	1	1	0	3572	0	1	1	0	1328	0	1	1	0	36	0	1	1	8	108667	7.36194e-05	1	1	1	12020	8.31947e-05	1	1	0	603	0	1	1	0	1233	0	1	1	0	7	0	1	1	0	176
hsa-mir-561	63	AG	0	0	0			0	31	0	1	1	0	46	0	1	1	0	0	0			0	13	0	1	1	0	77	0	1	1	0	11	0	1	1	0	68	0	1	1	0	0	0			0	26
hsa-mir-374a	27	AG	1	14082	7.10126e-05	1	1	1	17058	5.86235e-05	1	1	10	101305	9.87118e-05	1	1	0	5417	0	1	1	7	124169	5.63748e-05	1	1	4	141591	2.82504e-05	1	1	1	14040	7.12251e-05	1	1	2	77558	2.57872e-05	1	1	0	1098	0	1	1	0	8386
hsa-mir-561	64	AG	0	0	0			0	35	0	1	1	0	48	0	1	1	0	1	0	1	1	0	13	0	1	1	0	75	0	1	1	0	10	0	1	1	0	77	0	1	1	0	0	0			0	26
hsa-mir-532	34	AG	73	145130	0.000502997	1	1	847	645628	0.0013119	1	1	2249	2298786	0.000978342	1	1	76	73364	0.00103593	1	1	6140	1991989	0.00308235	1	1	6420	3178327	0.00201993	1	1	401	260017	0.00154221	1	1	1446	1669074	0.000866349	1	1	63	41968	0.00150114	1	1	281	201364
hsa-mir-1252	5	AG	0	0	0			0	0	0			0	10	0	1	1	0	0	0			0	15	0	1	1	0	19	0	1	1	0	0	0			0	5	0	1	1	0	0	0			0	0
hsa-mir-3135a	28	AG	0	7	0	1	1	0	7	0	1	1	0	71	0	1	1	0	7	0	1	1	0	527	0	1	1	2	50	0.04	0.0894353	1	0	6	0	1	1	0	41	0	1	1	0	0	0			0	2
hsa-mir-561	70	AG	0	0	0			0	41	0	1	1	0	61	0	1	1	0	1	0	1	1	1	15	0.0666667	0.139942	1	2	76	0.0263158	0.176473	1	0	10	0	1	1	2	81	0.0246914	0.194458	1	0	0	0			0	27
hsa-mir-1252	26	AG	0	1	0	1	1	0	0	0			1	19	0.0526316	0.173831	1	0	1	0	1	1	3	28	0.107143	0.00271712	1	1	35	0.0285714	0.296552	1	0	0	0			0	7	0	1	1	0	0	0			0	0
hsa-mir-3176	74	AG	0	117	0	1	1	3	121	0.0247934	0.121818	1	4	989	0.00404449	0.989079	1	0	6	0	1	1	8	292	0.0273973	0.00987323	1	16	1252	0.0127796	0.194578	1	0	13	0	1	1	3	558	0.00537634	0.917497	1	0	0	0			2	44
hsa-mir-3120	52	AG	0	314	0	1	1	1	3392	0.000294811	1	1	55	59189	0.000929227	1	1	1	2108	0.000474383	1	1	1	1580	0.000632911	1	1	89	120055	0.000741327	1	1	8	8260	0.000968523	1	1	40	39357	0.00101634	1	1	1	1063	0.000940734	0.999977	1	6	7722
hsa-mir-106b	29	AG	40	135601	0.000294983	1	1	8	71123	0.000112481	1	1	224	1055126	0.000212297	1	1	3	15046	0.000199389	1	1	145	801638	0.00018088	1	1	156	972790	0.000160363	1	1	5	40517	0.000123405	1	1	159	730084	0.000217783	1	1	0	1918	0	1	1	7	49558
hsa-mir-3120	57	AG	1	353	0.00283286	0.971211	1	0	3680	0	1	1	2	62728	3.18837e-05	1	1	0	2226	0	1	1	1	1732	0.000577367	1	1	20	134157	0.000149079	1	1	0	10070	0	1	1	5	42352	0.000118058	1	1	0	1220	0	1	1	0	8146
hsa-mir-1304	35	AG	0	135	0	1	1	0	121	0	1	1	1	1119	0.000893655	0.999987	1	0	19	0	1	1	0	620	0	1	1	0	649	0	1	1	0	49	0	1	1	0	695	0	1	1	0	4	0	1	1	0	45
hsa-mir-130a	56	AG	13	48573	0.000267638	1	1	14	20887	0.000670273	1	1	115	174481	0.000659098	1	1	3	4068	0.000737463	1	1	633	227445	0.00278309	1	1	473	269546	0.0017548	1	1	60	48777	0.00123009	1	1	107	183261	0.000583867	1	1	5	3372	0.0014828	1	1	11	16373
hsa-mir-3120	58	AG	0	346	0	1	1	0	3787	0	1	1	6	63678	9.42241e-05	1	1	0	2276	0	1	1	1	1752	0.000570776	1	1	16	135552	0.000118036	1	1	2	10042	0.000199164	1	1	2	43216	4.62792e-05	1	1	0	1266	0	1	1	0	8239
hsa-mir-210	77	AG	5	62314	8.02388e-05	1	1	74	805966	9.18153e-05	1	1	448	2854503	0.000156945	1	1	2	4440	0.00045045	1	1	80	488684	0.000163705	1	1	424	2987378	0.00014193	1	1	5	40889	0.000122282	1	1	321	2334384	0.00013751	1	1	0	1245	0	1	1	30	219045
hsa-mir-3120	67	AG	0	330	0	1	1	1	3365	0.000297177	1	1	5	54291	9.20963e-05	1	1	0	1926	0	1	1	0	1657	0	1	1	11	128437	8.56451e-05	1	1	0	9837	0	1	1	4	39065	0.000102393	1	1	0	1124	0	1	1	2	6882
hsa-mir-3120	71	AG	0	284	0	1	1	0	2239	0	1	1	4	38696	0.00010337	1	1	0	1508	0	1	1	1	1312	0.000762195	0.999998	1	23	99554	0.00023103	1	1	4	8045	0.000497203	1	1	0	29149	0	1	1	0	892	0	1	1	0	5025
hsa-mir-598	62	AG	3	4444	0.000675068	1	1	38	33944	0.00111949	1	1	41	73961	0.000554346	1	1	1	2296	0.00043554	1	1	1597	491049	0.00325222	1	1	77	59217	0.0013003	1	1	1	4972	0.000201126	1	1	16	35412	0.000451824	1	1	0	412	0	1	1	9	6537
hsa-mir-181a-1	44	AG	643	2654910	0.000242193	1	1	171	1190807	0.0001436	1	1	391	2721499	0.000143671	1	1	10	63742	0.000156882	1	1	2954	17675764	0.000167121	1	1	1418	5776091	0.000245495	1	1	100	294764	0.000339254	1	1	290	1800176	0.000161095	1	1	10	13230	0.000755858	1	1	108	603512
hsa-mir-548aa-2	65	AG	0	5	0	1	1	0	1	0	1	1	0	5	0	1	1	0	0	0			0	5	0	1	1	0	8	0	1	1	0	0	0			0	8	0	1	1	0	0	0			0	0
hsa-mir-22	67	AG	464	3431288	0.000135226	1	1	3524	58922648	5.98072e-05	1	1	17249	195566643	8.82001e-05	1	1	675	7353279	9.17958e-05	1	1	15195	121113556	0.000125461	1	1	21705	279861924	7.75561e-05	1	1	3041	34420058	8.83496e-05	1	1	8329	103247327	8.06704e-05	1	1	112	1405802	7.96698e-05	1	1	990	19666016
hsa-mir-3162	12	AG	0	7	0	1	1	0	10	0	1	1	0	20	0	1	1	0	2	0	1	1	0	8	0	1	1	0	27	0	1	1	0	3	0	1	1	2	16	0.125	0.0109329	1	0	0	0			0	1
hsa-mir-7-2	41	AG	0	119	0	1	1	0	612	0	1	1	0	2790	0	1	1	0	25	0	1	1	1	7031	0.000142227	1	1	0	3626	0	1	1	0	41	0	1	1	0	1529	0	1	1	0	3	0	1	1	0	55
hsa-mir-1273c	17	AG	0	8	0	1	1	0	6	0	1	1	0	5	0	1	1	0	0	0			0	19	0	1	1	0	21	0	1	1	0	2	0	1	1	0	8	0	1	1	0	0	0			0	1
hsa-mir-214	76	AG	0	127	0	1	1	2	1105	0.00180995	0.999817	1	172	34599	0.00497124	1	1	10	1943	0.00514668	0.993266	1	3	873	0.00343643	0.992473	1	362	46943	0.00771148	1	1	27	5181	0.00521135	0.999947	1	90	21227	0.00423988	1	1	2	407	0.004914	0.914486	1	6	2364
hsa-mir-33a	15	AG	1	9816	0.000101874	1	1	2	21360	9.3633e-05	1	1	9	64529	0.000139472	1	1	0	410	0	1	1	48	102782	0.000467008	1	1	32	72055	0.000444105	1	1	0	2545	0	1	1	13	64658	0.000201058	1	1	0	177	0	1	1	2	4937
hsa-mir-339	61	AG	1	4690	0.00021322	1	1	1	3926	0.000254712	1	1	1	24039	4.15991e-05	1	1	0	819	0	1	1	2	41561	4.8122e-05	1	1	0	48585	0	1	1	1	3021	0.000331016	1	1	3	19408	0.000154575	1	1	0	254	0	1	1	1	1615
hsa-mir-139	63	AG	0	225	0	1	1	37	227174	0.000162871	1	1	15	28361	0.000528895	1	1	3	9359	0.000320547	1	1	134	338616	0.000395728	1	1	21	43027	0.000488066	1	1	15	25517	0.000587843	1	1	4	9457	0.000422967	1	1	1	869	0.00115075	0.999839	1	1	2179
hsa-mir-3120	31	AG	0	28	0	1	1	0	344	0	1	1	2	8873	0.000225403	1	1	0	516	0	1	1	0	282	0	1	1	3	13198	0.000227307	1	1	0	1416	0	1	1	1	5322	0.000187899	1	1	0	129	0	1	1	0	745
hsa-mir-203a	85	AG	5	18005	0.000277701	1	1	85	209579	0.000405575	1	1	16941	66116050	0.000256231	1	1	178	1294446	0.000137511	1	1	1430	508775	0.00281067	1	1	9995	27935681	0.000357786	1	1	108	588675	0.000183463	1	1	20407	86393471	0.00023621	1	1	3	20335	0.000147529	1	1	227	674333
cancer abbreviations can be found in Table S1
TP- Primary Solid Tumor
NT- Solid Tissue Normal
TB- Primary Blood Derived Cancer - Peripheral Blood
edited- Number of edited reads
Overall count- total coverage
Ratio- Edited reads/ total coverage
Source PMID- PubMed ID for manuscripts the detected this site
[truncated: 231 more columns]

## Sheet: Table S4
miR	Locus	normal_mean	tumor_mean	T-N	T/N	p value	fdr	cancer
hsa-mir-497	25	0.0750665	0.0168019	-0.0582646	0.223827	1.23571e-05	0.000108742	BLCA
hsa-let-7c	27	0.00667494	0.106291	0.0996157	15.9238	1.60704e-09	7.07097e-08	BLCA
hsa-mir-378a	58	0.237262	0.0293282	-0.207934	0.123611	7.04283e-08	1.54942e-06	BLCA
hsa-let-7d	66	0.00370297	0.00130734	-0.00239563	0.353052	4.31461e-05	0.000271204	BLCA
hsa-mir-24-2	18	0.0365145	0.00307407	-0.0334404	0.0841879	2.19677e-05	0.000161097	BLCA
hsa-mir-151a	49	0.0139478	0.00837045	-0.00557731	0.600129	2.3109e-06	2.54199e-05	BLCA
hsa-mir-589	66	0.709904	0.570563	-0.139341	0.803719	0.00686439	0.0274576	BLCA
hsa-mir-625	58	0.050881	0.072312	0.021431	1.4212	0.00555716	0.0244515	BLCA
hsa-mir-421	61	0.0553832	0.018064	-0.0373192	0.326163	0.000363674	0.00200021	BLCA
hsa-mir-99a	13	0.0283584	0.0132257	-0.0151327	0.466378	0.00125542	0.00613761	BLCA
hsa-mir-98	32	0.0625119	0.0270635	-0.0354484	0.432934	1.35279e-07	1.9841e-06	BLCA
hsa-mir-1304	57	0.0770697	0.114201	0.0371312	1.48179	4.66932e-06	2.74323e-05	BRCA
hsa-mir-1301	52	0.00301932	0.00601994	0.00300062	1.99381	0.000516373	0.00220632	BRCA
hsa-mir-497	25	0.0084101	0.00783963	-0.000570466	0.932169	0.00241412	0.00756425	BRCA
hsa-mir-200b	61	0.00857667	0.024104	0.0155274	2.81042	5.30179e-20	8.30613e-19	BRCA
hsa-let-7c	27	0.013946	0.0574621	0.0435161	4.12033	9.66271e-23	2.27074e-21	BRCA
hsa-mir-378a	58	0.0180456	0.0101421	-0.00790351	0.562026	1.5001e-18	1.76262e-17	BRCA
hsa-mir-411	20	0.216416	0.253112	0.0366964	1.16956	0.000669102	0.00262065	BRCA
hsa-mir-27a	56	0.00168714	0.00232981	0.000642673	1.38092	0.00114513	0.00414009	BRCA
hsa-mir-24-2	18	0.00610689	0.00380984	-0.00229705	0.623859	0.00948783	0.0247738	BRCA
hsa-mir-151a	49	0.0163119	0.0231712	0.00685927	1.42051	7.05959e-05	0.000368667	BRCA
hsa-mir-1260b	18	0.9675	0.983473	0.0159732	1.01651	0.00235001	0.00756425	BRCA
hsa-mir-589	66	0.66864	0.77077	0.10213	1.15274	1.56539e-08	1.05105e-07	BRCA
hsa-mir-625	58	0.086907	0.177289	0.0903822	2.03999	1.73698e-23	8.16381e-22	BRCA
hsa-mir-532	34	0.00162109	0.00225379	0.0006327	1.39029	0.00376369	0.0110558	BRCA
hsa-mir-381	55	0.00748715	0.0106887	0.00320153	1.4276	0.00031735	0.00149154	BRCA
hsa-mir-381	52	0.375686	0.430691	0.0550044	1.14641	3.56353e-14	2.79143e-13	BRCA
hsa-mir-944	59	0.00539942	0.0168572	0.0114578	3.12204	0.00688354	0.019031	BRCA
hsa-mir-98	32	0.0942305	0.0471028	-0.0471277	0.499868	3.84057e-15	3.61014e-14	BRCA
hsa-let-7c	27	0.00641454	0.0457	0.0392854	7.12444	2.25692e-09	9.02768e-08	CHOL
hsa-mir-378c	31	0.028069	0.0106306	-0.0174384	0.378731	0.0024181	0.0249253	CHOL
hsa-mir-376a-1	49	0.846052	0.678279	-0.167773	0.801699	0.00249253	0.0249253	CHOL
hsa-mir-98	32	0.0632204	0.0175259	-0.0456945	0.277219	8.10235e-07	1.62047e-05	CHOL
hsa-mir-379	10	0.0361611	0.00826906	-0.027892	0.228673	1.34949e-06	3.10382e-05	COAD
hsa-mir-200b	61	0.000899574	0.00432511	0.00342553	4.80795	7.89669e-05	0.000454059	COAD
hsa-mir-27a	56	0	0.000690006	0.000690006	Inf	3.21038e-05	0.000246129	COAD
hsa-mir-151a	49	0.00372687	0.00582439	0.00209752	1.56281	0.00536685	0.0205729	COAD
hsa-mir-381	55	0.00390625	0.00709175	0.0031855	1.81549	0.00704465	0.0231467	COAD
hsa-mir-381	52	0.213623	0.339341	0.125718	1.5885	1.81794e-05	0.000209064	COAD
hsa-mir-99b	47	0.00479229	0.000998861	-0.00379343	0.208431	0.000201211	0.00092557	COAD
hsa-mir-98	32	0.481818	0.0154785	-0.46634	0.0321253	0.0132672	0.0381433	COAD
hsa-mir-497	25	0.0224985	0.0069883	-0.0155102	0.310611	0.0016505	0.0115535	ESCA
hsa-mir-379	10	0.0163576	0.00703756	-0.00932005	0.430232	0.000115384	0.00322301	ESCA
hsa-mir-411	20	0.256447	0.171843	-0.0846042	0.670091	0.000243439	0.00340815	ESCA
hsa-mir-151a	49	0.0128042	0.00798648	-0.00481774	0.623738	0.00085376	0.00717159	ESCA
hsa-mir-301a	70	0.0136414	0.00102441	-0.012617	0.0750958	0.000614723	0.0064546	ESCA
hsa-mir-421	61	0.0489056	0.014276	-0.0346296	0.291909	0.00458457	0.0275074	ESCA
hsa-mir-99a	13	0.014335	0.00654899	-0.00778604	0.456852	0.000153477	0.00322301	ESCA
hsa-mir-1304	57	0.0365796	0.0628281	0.0262485	1.71757	2.44652e-08	2.34866e-07	HNSC
hsa-mir-497	25	0.0150969	0.0035935	-0.0115034	0.238029	7.14093e-19	3.42765e-17	HNSC
hsa-mir-200b	61	0.00336432	0.00575645	0.00239213	1.71103	0.000601879	0.00262638	HNSC
hsa-let-7c	27	0.00895067	0.062434	0.0534833	6.97534	3.6497e-16	8.75927e-15	HNSC
hsa-let-7e	57	0.00536843	0.0021244	-0.00324403	0.39572	0.0129662	0.0388986	HNSC
hsa-mir-539	18	0.0432837	0.0238214	-0.0194623	0.550356	0.014052	0.0396762	HNSC
hsa-mir-27a	56	0.000930161	0.000786979	-0.000143182	0.846067	0.00529926	0.0169576	HNSC
hsa-mir-24-2	18	0.00440133	0.00123298	-0.00316836	0.280137	0.00101311	0.00405242	HNSC
hsa-mir-151a	49	0.00916216	0.00741019	-0.00175197	0.808782	0.000358788	0.00172218	HNSC
hsa-mir-301a	70	0.00979455	0.000555208	-0.00923935	0.0566854	0.00244223	0.00837335	HNSC
hsa-mir-625	58	0.0614454	0.0798846	0.0184392	1.30009	0.00128231	0.00473469	HNSC
hsa-mir-4662a	8	0.00684494	0.00251795	-0.00432699	0.367856	1.94754e-07	1.55803e-06	HNSC
hsa-mir-99a	13	0.00959246	0.00485575	-0.00473671	0.506205	1.19723e-14	1.91556e-13	HNSC
hsa-mir-381	55	0.00534011	0.00847199	0.00313189	1.58648	2.88073e-05	0.000197536	HNSC
hsa-mir-381	52	0.244202	0.315695	0.0714932	1.29276	0.000215237	0.00114793	HNSC
hsa-mir-99b	47	0.00462	0.00152698	-0.00309302	0.330515	1.64785e-08	1.97742e-07	HNSC
hsa-mir-944	59	0.00463608	0.00804915	0.00341307	1.7362	3.58393e-05	0.000215036	HNSC
hsa-mir-1304	57	0.0733814	0.0493109	-0.0240705	0.671981	0.0103549	0.0197236	KICH
hsa-mir-598	62	0.000838101	0.000139603	-0.000698498	0.166571	0.0181625	0.0330228	KICH
hsa-mir-497	25	0.0255523	0.00993938	-0.0156129	0.388982	4.97262e-06	2.8415e-05	KICH
hsa-mir-379	10	0.0186693	0.0146524	-0.00401689	0.78484	0.00147865	0.00369663	KICH
hsa-mir-200b	61	0.00933	0.00546477	-0.00386523	0.585721	1.03078e-06	6.87183e-06	KICH
hsa-let-7c	27	0.00399712	0.0167825	0.0127854	4.19865	2.65695e-05	9.66162e-05	KICH
hsa-let-7d	66	0.00164968	0.00108298	-0.000566697	0.65648	0.00423841	0.00997273	KICH
hsa-let-7e	57	0.00326984	0.00180564	-0.0014642	0.552211	0.0286788	0.0498762	KICH
hsa-mir-337	66	0.0130529	0.00435249	-0.00870037	0.333451	5.1177e-05	0.00014622	KICH
hsa-mir-455	32	0.00666717	0.0100741	0.00340696	1.511	0.000370324	0.00098753	KICH
hsa-mir-27a	10	0.0161306	0.0116252	-0.00450537	0.720694	0.00844888	0.0168978	KICH
hsa-mir-27a	56	0.00225112	0.000921451	-0.00132967	0.40933	2.96231e-10	1.18492e-08	KICH
hsa-mir-1251	10	0.0175855	0	-0.0175855	0	0.00815529	0.0168978	KICH
hsa-mir-24-2	18	0.0106398	0.00251099	-0.00812881	0.236	3.03586e-07	3.03586e-06	KICH
hsa-mir-151a	49	0.0117188	0.00628851	-0.00543032	0.536616	5.43944e-07	4.35155e-06	KICH
hsa-mir-589	66	0.709482	0.557054	-0.152428	0.785156	1.83661e-05	8.16271e-05	KICH
hsa-mir-625	58	0.18606	0.109032	-0.0770282	0.586004	4.93059e-05	0.00014622	KICH
hsa-mir-4662a	8	0.00930524	0.00249739	-0.00680784	0.268386	1.59599e-05	7.97997e-05	KICH
hsa-mir-503	7	0.0109309	0.00311559	-0.00781529	0.285026	2.42349e-05	9.66162e-05	KICH
hsa-mir-99a	13	0.0113632	0.00504521	-0.006318	0.443995	1.2356e-08	1.74952e-07	KICH
hsa-mir-381	55	0.00803405	0.00494592	-0.00308813	0.615619	4.71534e-05	0.00014622	KICH
hsa-mir-381	52	0.492558	0.35093	-0.141628	0.712465	1.31214e-08	1.74952e-07	KICH
hsa-mir-99b	47	0.00167906	0.000942556	-0.000736509	0.561358	0.00536671	0.011926	KICH
hsa-mir-497	25	0.0242566	0.00943237	-0.0148242	0.388858	1.15556e-10	2.3689e-09	KIRC
hsa-mir-200b	61	0.0102026	0.0172649	0.00706232	1.69221	3.84277e-05	0.000175059	KIRC
hsa-let-7c	27	0.0214958	0.0551447	0.0336489	2.56537	9.38042e-08	6.40995e-07	KIRC
hsa-mir-378a	58	0.00759347	0.00901377	0.0014203	1.18704	0.00213944	0.00674746	KIRC
hsa-mir-337	66	0.00839014	0.00761293	-0.00077721	0.907366	0.00779795	0.0199823	KIRC
hsa-mir-455	32	0.00830152	0.00456441	-0.00373711	0.549828	0.000877783	0.00299909	KIRC
hsa-mir-27a	56	0.00191514	0.00113419	-0.000780948	0.592223	4.8621e-08	3.98692e-07	KIRC
hsa-mir-24-2	18	0.00873944	0.00392232	-0.00481713	0.448806	0.00702164	0.0195556	KIRC
hsa-mir-151a	49	0.0192634	0.0160976	-0.00316573	0.835661	3.79156e-08	3.88635e-07	KIRC
hsa-mir-589	66	0.716777	0.676556	-0.0402216	0.943885	0.0109223	0.026342	KIRC
hsa-mir-376a-2	55	0.958042	0.637029	-0.321013	0.664928	0.0216256	0.0492583	KIRC
hsa-mir-376c	48	0.235599	0.107321	-0.128278	0.455526	1.03572e-08	1.41548e-07	KIRC
hsa-mir-625	58	0.149046	0.180295	0.0312489	1.20966	0.00715449	0.0195556	KIRC
hsa-mir-99a	13	0.0125373	0.0099525	-0.00258481	0.79383	3.42568e-07	2.00647e-06	KIRC
hsa-mir-381	55	0.0106631	0.00746548	-0.00319761	0.700123	1.20724e-06	6.18712e-06	KIRC
hsa-mir-381	52	0.457957	0.353297	-0.10466	0.771463	1.03922e-20	4.26078e-19	KIRC
hsa-mir-99b	47	0.00242201	0.00126913	-0.00115287	0.524001	0.000266781	0.000994365	KIRC
hsa-mir-98	32	0.0164116	0.026724	0.0103123	1.62836	0.000260411	0.000994365	KIRC
hsa-mir-598	62	0.00154419	0.000642	-0.00090219	0.415752	0.00172402	0.00455382	KIRP
hsa-mir-497	25	0.0256027	0.0124382	-0.0131645	0.485816	8.23854e-09	6.17891e-08	KIRP
hsa-mir-379	10	0.0182042	0.0149309	-0.00327326	0.820192	0.00182153	0.00455382	KIRP
hsa-mir-200b	61	0.0102101	0.00699505	-0.00321509	0.685108	1.90036e-07	9.50181e-07	KIRP
hsa-let-7c	27	0.014122	0.0260362	0.0119141	1.84365	0.015781	0.0284058	KIRP
hsa-let-7d	66	0.00185851	0.000919723	-0.000938786	0.494871	1.45687e-06	5.46325e-06	KIRP
hsa-let-7e	57	0.00237155	0.00198911	-0.000382439	0.838739	0.0149902	0.0281067	KIRP
hsa-mir-337	66	0.0102962	0.0108229	0.000526754	1.05116	0.00773235	0.0159996	KIRP
hsa-mir-455	32	0.00685423	0.00239016	-0.00446407	0.348713	1.24259e-06	5.08332e-06	KIRP
hsa-mir-27a	56	0.00226927	0.00124386	-0.00102541	0.548133	1.86654e-10	2.09985e-09	KIRP
hsa-mir-24-2	18	0.011276	0.00296132	-0.0083147	0.262621	9.1099e-12	2.04973e-10	KIRP
hsa-mir-151a	49	0.0192754	0.0101955	-0.0090799	0.528938	1.00144e-16	4.50649e-15	KIRP
hsa-mir-301a	70	0.0109893	0.000974564	-0.0100147	0.0886831	1.50577e-09	1.3552e-08	KIRP
hsa-mir-589	66	0.70895	0.603632	-0.105319	0.851444	5.76316e-05	0.000172895	KIRP
hsa-mir-376a-1	49	0.833859	0.711854	-0.122004	0.853687	0.0127838	0.0250117	KIRP
hsa-mir-376a-2	55	0.846034	0.723358	-0.122675	0.854999	0.007822	0.0159996	KIRP
hsa-mir-376c	48	0.280076	0.14111	-0.138966	0.503828	1.33314e-08	8.35603e-08	KIRP
hsa-mir-625	58	0.100938	0.0881592	-0.0127791	0.873397	0.00690602	0.0155385	KIRP
hsa-mir-4662a	8	0.00503739	0.00421259	-0.000824805	0.836263	4.72852e-06	1.6368e-05	KIRP
hsa-mir-503	7	0.0190335	0.00780126	-0.0112322	0.40987	1.48552e-08	8.35603e-08	KIRP
hsa-mir-532	34	0.00124351	0.000961663	-0.000281846	0.773346	0.00208755	0.00494421	KIRP
hsa-mir-99a	13	0.0114998	0.00623908	-0.00526071	0.542539	4.40187e-11	6.6028e-10	KIRP
hsa-mir-381	52	0.447437	0.379015	-0.0684226	0.847079	1.78751e-05	5.74555e-05	KIRP
hsa-mir-381	55	0.0126774	0.00708523	-0.00559218	0.558886	3.20427e-07	1.44192e-06	KIRP
hsa-mir-99b	47	0.00253161	0.00137504	-0.00115657	0.543147	9.00542e-05	0.000253278	KIRP
hsa-mir-598	62	0.00162433	0.00072733	-0.000897	0.447772	0.0229242	0.0488386	LIHC
hsa-mir-497	83	0.481175	0.247778	-0.233396	0.514945	0.00023523	0.000947732	LIHC
hsa-mir-497	25	0.0183433	0.00719648	-0.0111468	0.392322	1.77854e-12	2.90495e-11	LIHC
hsa-mir-379	10	0.0135282	0.0111426	-0.00238565	0.823654	0.000202818	0.000903462	LIHC
hsa-mir-6503	59	0.739462	0.387586	-0.351876	0.524146	0.000270781	0.000947732	LIHC
hsa-mir-200b	61	0.0123399	0.0281017	0.0157617	2.27729	0.00466068	0.0126874	LIHC
hsa-let-7c	27	0.00442769	0.0228551	0.0184274	5.16186	1.63572e-17	8.01501e-16	LIHC
hsa-mir-378a	58	0.00458947	0.00644596	0.00185649	1.40451	6.51475e-05	0.000354692	LIHC
hsa-let-7d	66	0.00191516	0.00139086	-0.000524301	0.726236	0.000472498	0.00154349	LIHC
hsa-mir-337	66	0.0100606	0.00774919	-0.00231143	0.77025	0.00094883	0.00290579	LIHC
hsa-mir-27a	56	0.0027898	0.00134932	-0.00144048	0.483662	2.57579e-15	6.31068e-14	LIHC
hsa-mir-151a	49	0.0174846	0.017286	-0.000198621	0.98864	0.00672449	0.016475	LIHC
hsa-mir-1260b	18	0.99219	0.991385	-0.0008048	0.999189	0.0143373	0.031933	LIHC
hsa-mir-376a-1	49	0.838763	0.622453	-0.21631	0.742108	8.7011e-12	1.06588e-10	LIHC
hsa-mir-376a-1	9	0.118975	0.0737673	-0.0452076	0.620024	0.00318366	0.00917642	LIHC
hsa-mir-376a-2	55	0.816857	0.640729	-0.176128	0.784384	3.36485e-08	2.35539e-07	LIHC
hsa-mir-376a-2	15	0.381415	0.200716	-0.180699	0.52624	0.00643694	0.016475	LIHC
hsa-mir-376c	48	0.165576	0.123702	-0.0418739	0.747101	0.000251728	0.000947732	LIHC
hsa-mir-503	7	0.0173157	0.00913426	-0.00818141	0.527514	7.4613e-05	0.000365604	LIHC
hsa-mir-532	34	0.00249921	0.00139115	-0.00110806	0.556636	1.40807e-09	1.14992e-08	LIHC
hsa-mir-381	52	0.416336	0.347384	-0.0689521	0.834383	6.33909e-10	6.21231e-09	LIHC
hsa-mir-944	59	0.00882353	0.0307271	0.0219036	3.48241	0.00744249	0.0173658	LIHC
hsa-mir-98	32	0.0657841	0.0430516	-0.0227325	0.654438	3.68948e-05	0.00022598	LIHC
hsa-mir-1304	57	0.0708741	0.108696	0.0378222	1.53365	1.13376e-05	2.80106e-05	LUAD
hsa-mir-1301	52	0.0012837	0.00431183	0.00302813	3.35892	0.00108484	0.00227816	LUAD
hsa-mir-497	25	0.171074	0.0473417	-0.123732	0.276732	9.74934e-24	2.22091e-22	LUAD
hsa-mir-379	10	0.0434576	0.0215056	-0.021952	0.494863	2.97076e-14	1.38636e-13	LUAD
hsa-mir-200b	61	0.00781409	0.0159767	0.0081626	2.0446	2.44803e-07	6.85449e-07	LUAD
hsa-let-7c	27	0.0105718	0.0280822	0.0175104	2.65632	5.687e-09	1.83734e-08	LUAD
hsa-mir-378a	58	0.035841	0.0127841	-0.0230569	0.356689	3.68608e-17	2.21165e-16	LUAD
hsa-mir-411	20	0.358051	0.205013	-0.153038	0.572582	2.69508e-13	1.02903e-12	LUAD
hsa-let-7d	66	0.00695829	0.00210774	-0.00485055	0.30291	1.20718e-20	1.01403e-19	LUAD
hsa-let-7e	57	0.00705266	0.00475759	-0.00229507	0.674581	0.0274576	0.0480508	LUAD
hsa-mir-455	32	0.0913025	0.0120144	-0.0792881	0.131589	1.05758e-23	2.22091e-22	LUAD
hsa-mir-27a	10	0.011806	0.0101615	-0.00164452	0.860705	0.00206421	0.00412842	LUAD
hsa-mir-24-2	18	0.0529501	0.0063406	-0.0466095	0.119747	7.46005e-21	7.83305e-20	LUAD
hsa-mir-301a	70	0.0366976	0.00410476	-0.0325929	0.111853	3.6245e-06	9.51431e-06	LUAD
hsa-mir-376c	48	0.0991948	0.151285	0.0520901	1.52513	0.00980582	0.0187202	LUAD
hsa-mir-625	58	0.0581771	0.116699	0.0585223	2.00593	7.08647e-18	4.96053e-17	LUAD
hsa-mir-4662a	8	0.0568686	0.0142763	-0.0425923	0.25104	2.43656e-13	1.02335e-12	LUAD
hsa-mir-99a	13	0.116658	0.0325051	-0.0841529	0.278636	5.59309e-23	7.83032e-22	LUAD
hsa-mir-381	55	0.00439757	0.0084336	0.00403602	1.91778	0.000160181	0.000354083	LUAD
hsa-mir-381	52	0.266758	0.353792	0.0870338	1.32626	2.06171e-11	7.21597e-11	LUAD
hsa-mir-99b	47	0.0067738	0.00302491	-0.00374888	0.446561	1.98852e-08	5.96557e-08	LUAD
hsa-mir-130b	71	0.0207438	0.00443431	-0.0163095	0.213765	1.53249e-05	3.57582e-05	LUAD
hsa-mir-944	59	0.00649207	0.01454	0.00804792	2.23965	0.0116621	0.0212959	LUAD
hsa-mir-98	32	0.06856	0.0363955	-0.0321645	0.530856	1.6185e-15	8.49712e-15	LUAD
hsa-mir-598	62	0.000996869	0.000562858	-0.00043401	0.564626	3.24189e-08	8.77217e-08	LUSC
hsa-mir-497	83	0.694468	0.490177	-0.204291	0.705831	1.8904e-07	4.34792e-07	LUSC
hsa-mir-497	25	0.133835	0.0223898	-0.111445	0.167294	8.76208e-26	5.75794e-25	LUSC
hsa-mir-664a	18	0.0309419	0.014128	-0.0168139	0.456599	2.98084e-05	6.23266e-05	LUSC
hsa-mir-379	10	0.0589627	0.0155361	-0.0434267	0.26349	1.95822e-23	1.12598e-22	LUSC
hsa-mir-377	54	0.0231911	0.0040996	-0.0190915	0.176775	0.0336706	0.0499628	LUSC
hsa-let-7c	27	0.0169944	0.0418413	0.0248469	2.46206	4.45723e-05	8.91446e-05	LUSC
hsa-mir-378a	58	0.0445888	0.00897074	-0.035618	0.201188	8.63557e-27	7.94472e-26	LUSC
hsa-mir-411	20	0.372425	0.177714	-0.194711	0.477181	2.55927e-17	9.81054e-17	LUSC
hsa-let-7d	66	0.00739952	0.00115538	-0.00624414	0.156143	3.12915e-27	3.59852e-26	LUSC
hsa-let-7e	57	0.00580093	0.00305497	-0.00274597	0.526634	2.59849e-10	7.96869e-10	LUSC
hsa-mir-455	32	0.0582529	0.00638628	-0.0518667	0.10963	5.13173e-29	7.86865e-28	LUSC
hsa-mir-539	18	0.110739	0.0370909	-0.0736486	0.334938	5.34069e-05	0.000102363	LUSC
hsa-mir-27a	10	0.011152	0.00875415	-0.00239783	0.784986	8.86671e-05	0.000163147	LUSC
hsa-mir-27a	56	0.00150981	0.00114366	-0.000366149	0.757487	1.8644e-07	4.34792e-07	LUSC
hsa-mir-1251	10	0.0320513	0	-0.0320513	0	0.0151258	0.0248495	LUSC
hsa-mir-24-2	18	0.043043	0.00269006	-0.0403529	0.062497	5.14612e-36	2.36722e-34	LUSC
hsa-mir-151a	49	0.0162953	0.00840618	-0.00788909	0.515866	2.67514e-21	1.23057e-20	LUSC
hsa-mir-301a	70	0.0210073	0.0018298	-0.0191775	0.0871033	8.63484e-23	4.41336e-22	LUSC
hsa-mir-376a-1	49	0.792657	0.682137	-0.11052	0.860571	0.0296724	0.0454976	LUSC
hsa-mir-376a-2	55	0.821313	0.691053	-0.13026	0.8414	0.0175941	0.0279079	LUSC
hsa-mir-376c	48	0.194062	0.147262	-0.0468008	0.758836	0.000848626	0.00150142	LUSC
hsa-mir-625	58	0.0749699	0.123651	0.0486812	1.64934	4.04719e-08	1.03428e-07	LUSC
hsa-mir-421	61	0.0468399	0.0163554	-0.0304845	0.349177	8.13615e-06	1.7822e-05	LUSC
hsa-mir-4662a	8	0.0669908	0.00500921	-0.0619816	0.0747745	5.92896e-31	1.36366e-29	LUSC
hsa-mir-99a	13	0.120129	0.0158887	-0.104241	0.132263	4.31164e-26	3.30559e-25	LUSC
hsa-mir-381	52	0.340847	0.364464	0.0236162	1.06929	0.00980436	0.0167037	LUSC
hsa-mir-99b	47	0.00551884	0.0015712	-0.00394764	0.284697	6.4668e-21	2.7043e-20	LUSC
hsa-mir-130b	71	0.0193227	0.00193535	-0.0173873	0.10016	4.55941e-12	1.49809e-11	LUSC
hsa-mir-944	59	0.0103578	0.00973906	-0.000618757	0.940262	1.67e-09	4.80125e-09	LUSC
hsa-mir-98	32	0.0600606	0.0281509	-0.0319097	0.468708	1.5739e-12	5.5692e-12	LUSC
hsa-mir-1301	52	0.00387597	0.0290821	0.0252061	7.50318	0.0123095	0.0395565	PCPG
hsa-mir-379	10	0.00571166	0.0296924	0.0239807	5.19855	0.0046708	0.0306192	PCPG
hsa-mir-488	56	0	0.0437032	0.0437032	Inf	0.0124915	0.0395565	PCPG
hsa-mir-411	20	0.0972859	0.390563	0.293277	4.01459	0.00394903	0.0306192	PCPG
hsa-mir-27a	56	0.00270975	0.0157601	0.0130503	5.81606	0.00701151	0.0380625	PCPG
hsa-mir-151a	49	0.0141978	0.0704376	0.0562398	4.96115	0.00483462	0.0306192	PCPG
hsa-mir-376c	48	0.128111	0.482055	0.353944	3.76278	0.00475702	0.0306192	PCPG
hsa-mir-532	34	0.000969887	0.00634618	0.0053763	6.54322	0.00483462	0.0306192	PCPG
hsa-mir-381	55	0.0065293	0.015573	0.00904374	2.3851	0.00940833	0.0395565	PCPG
hsa-mir-381	52	0.43688	0.639366	0.202487	1.46348	0.0121265	0.0395565	PCPG
hsa-mir-99b	47	0.0021751	0.0148317	0.0126566	6.81889	0.00910994	0.0395565	PCPG
hsa-mir-98	32	0.195611	0.0205261	-0.175085	0.104934	0.00306138	0.0306192	PCPG
hsa-mir-497	25	0.0136375	0.00801288	-0.00562463	0.587562	3.53171e-05	0.000276651	PRAD
hsa-mir-379	10	0.0109729	0.0126967	0.00172379	1.15709	0.00898805	0.0384035	PRAD
hsa-let-7c	27	0.00141126	0.00482685	0.00341559	3.42025	1.93376e-16	9.08868e-15	PRAD
hsa-mir-378a	58	0.0463788	0.0284934	-0.0178855	0.614361	9.12581e-09	1.42971e-07	PRAD
hsa-mir-27a	56	0.00239975	0.0016141	-0.000785642	0.672614	6.6404e-06	6.35985e-05	PRAD
hsa-mir-151a	49	0.0114208	0.0138291	0.00240827	1.21087	0.00013452	0.000903208	PRAD
hsa-mir-1260b	18	0.991424	0.995721	0.00429721	1.00433	6.76579e-06	6.35985e-05	PRAD
hsa-mir-301a	70	0.0128335	0.00294517	-0.00988837	0.22949	0.00611883	0.0287585	PRAD
hsa-mir-376c	48	0.318992	0.257096	-0.0618961	0.805964	0.000317532	0.0018655	PRAD
hsa-mir-381	52	0.361687	0.433274	0.0715873	1.19793	1.41667e-15	3.32918e-14	PRAD
hsa-mir-98	32	0.073512	0.102488	0.0289761	1.39417	0.000842574	0.00440011	PRAD
hsa-mir-379	10	0	0.00767739	0.00767739	Inf	0.00329386	0.0235541	READ
hsa-mir-378a	58	0.0257695	0.00553692	-0.0202326	0.214863	0.00441405	0.0235541	READ
hsa-let-7e	57	0.00718263	0.00233667	-0.00484596	0.325322	0.00471081	0.0235541	READ
hsa-mir-1260b	18	0.94069	0.986448	0.0457581	1.04864	0.00352018	0.0235541	READ
hsa-mir-1304	57	0.039282	0.0720678	0.0327859	1.83463	2.29879e-05	9.82209e-05	STAD
hsa-mir-497	25	0.0323079	0.00897845	-0.0233294	0.277903	8.1918e-13	1.28338e-11	STAD
hsa-mir-664a	18	0.030589	0.0161091	-0.0144799	0.52663	0.0184715	0.043408	STAD
hsa-mir-379	10	0.0236988	0.00914079	-0.014558	0.385706	2.15765e-18	1.01409e-16	STAD
hsa-mir-200b	61	0.00208871	0.00492366	0.00283495	2.35727	9.92581e-08	7.77522e-07	STAD
hsa-let-7c	27	0.0168516	0.0577657	0.040914	3.4279	0.00288398	0.00797335	STAD
hsa-mir-378a	58	0.0798311	0.0126469	-0.0671843	0.15842	1.11781e-11	1.31343e-10	STAD
hsa-mir-411	20	0.254042	0.184817	-0.0692253	0.727504	3.93292e-05	0.000154039	STAD
hsa-let-7d	66	0.00303114	0.00112595	-0.00190519	0.371462	8.77987e-08	7.77522e-07	STAD
hsa-mir-455	32	0.0097919	0.0024223	-0.0073696	0.247378	4.95928e-06	2.58985e-05	STAD
hsa-mir-24-2	18	0.0135181	0.00224686	-0.0112713	0.166211	8.69675e-06	4.08747e-05	STAD
hsa-mir-151a	49	0.0114645	0.00743696	-0.00402754	0.648695	5.65199e-07	3.32055e-06	STAD
hsa-mir-301a	70	0.0150438	0.000885635	-0.0141581	0.0588705	1.38121e-07	9.27383e-07	STAD
hsa-mir-376a-1	9	0.174261	0.078292	-0.0959691	0.44928	0.00151694	0.00475307	STAD
hsa-mir-376a-1	49	0.888136	0.78942	-0.0987163	0.88885	0.00282408	0.00797335	STAD
hsa-mir-4662a	8	0.00894108	0.00598015	-0.00296094	0.668839	0.00543081	0.0134341	STAD
hsa-mir-99a	13	0.0193676	0.00738722	-0.0119804	0.381421	1.73363e-13	4.07403e-12	STAD
hsa-mir-381	52	0.318911	0.365908	0.0469978	1.14737	6.85616e-05	0.000247877	STAD
hsa-mir-381	55	0.00593594	0.00846113	0.0025252	1.42541	0.000473429	0.00158937	STAD
hsa-mir-98	32	0.0508492	0.0329318	-0.0179174	0.647636	0.00331046	0.00864398	STAD
hsa-mir-497	25	0.0222957	0.0141968	-0.00809898	0.636748	2.47771e-07	1.699e-06	THCA
hsa-mir-379	10	0.0270632	0.0186226	-0.00844059	0.688115	1.37903e-10	1.32387e-09	THCA
hsa-mir-200b	61	0.00768482	0.0149633	0.00727849	1.94713	6.06555e-12	1.45573e-10	THCA
hsa-mir-378a	58	0.043482	0.018163	-0.025319	0.417714	1.54108e-11	2.46572e-10	THCA
hsa-mir-411	20	0.29036	0.224354	-0.0660064	0.772674	0.000105098	0.000504471	THCA
hsa-let-7d	66	0.00147905	0.00182567	0.000346611	1.23435	0.0177201	0.0447665	THCA
hsa-mir-27a	10	0.0138521	0.0148397	0.000987564	1.07129	0.0082694	0.0248082	THCA
hsa-mir-1251	10	0.0132675	0.026714	0.0134464	2.01348	1.21043e-10	1.32387e-09	THCA
hsa-mir-301b	64	0.0138889	0.0552473	0.0413584	3.9778	0.0134889	0.0380863	THCA
hsa-mir-1260b	18	0.97562	0.986042	0.010422	1.01068	0.00015433	0.00067344	THCA
hsa-mir-589	66	0.649695	0.694588	0.0448927	1.0691	0.00285665	0.00914129	THCA
hsa-mir-376c	48	0.237955	0.168728	-0.0692273	0.709074	0.000211387	0.000845547	THCA
hsa-mir-625	58	0.0865898	0.106285	0.0196953	1.22746	0.0017814	0.00610767	THCA
hsa-mir-532	34	0.00108818	0.00166864	0.000580467	1.53343	1.56929e-06	9.41575e-06	THCA
hsa-mir-99a	13	0.010662	0.00726835	-0.00339368	0.681704	7.6247e-14	3.65985e-12	THCA
hsa-mir-381	55	0.00867302	0.00834309	-0.000329934	0.961959	0.0170362	0.0447665	THCA
hsa-mir-381	52	0.462438	0.387233	-0.0752046	0.837374	1.05109e-09	8.40871e-09	THCA
hsa-mir-99b	47	0.0020569	0.00434427	0.00228737	2.11205	1.66799e-05	8.89592e-05	THCA
hsa-mir-98	32	0.0516915	0.0798975	0.0282061	1.54566	0.000856565	0.0031627	THCA
hsa-mir-497	25	0.0112594	0.00199972	-0.00925964	0.177605	1.00433e-20	4.82076e-19	UCEC
hsa-mir-497	83	0.376634	0.154354	-0.22228	0.409825	8.64217e-08	3.77113e-07	UCEC
hsa-mir-664a	18	0.0357572	0.0174507	-0.0183065	0.488033	2.88926e-06	1.0668e-05	UCEC
hsa-mir-379	10	0.0146717	0.0084651	-0.00620663	0.576967	7.02935e-10	3.74899e-09	UCEC
hsa-mir-3622a	52	0.323606	0.246371	-0.0772347	0.761331	0.0270287	0.043246	UCEC
hsa-let-7c	27	0.00636921	0.0413587	0.0349895	6.49353	1.42447e-11	1.36749e-10	UCEC
hsa-mir-378a	58	0.0263941	0.00686092	-0.0195332	0.259941	3.27866e-13	5.24585e-12	UCEC
hsa-mir-411	20	0.22032	0.169427	-0.0508924	0.769007	0.000383346	0.000968452	UCEC
hsa-let-7d	66	0.00194505	0.00102935	-0.000915703	0.529215	1.07427e-06	4.2971e-06	UCEC
hsa-let-7e	57	0.00236737	0.00207631	-0.00029106	0.877053	0.0182435	0.0312746	UCEC
hsa-mir-337	66	0.00875524	0.00786381	-0.000891423	0.898184	0.00372736	0.00745472	UCEC
hsa-mir-455	32	0.00587258	0.00263537	-0.0032372	0.44876	1.24979e-10	8.56999e-10	UCEC
hsa-mir-539	18	0.0399654	0.0234437	-0.0165216	0.586601	0.0201448	0.0333432	UCEC
hsa-mir-27a	56	0.00189682	0.00123455	-0.000662277	0.650849	0.00234109	0.00510784	UCEC
hsa-mir-1251	10	0.0430411	0.00743619	-0.0356049	0.17277	7.80902e-05	0.00020824	UCEC
hsa-mir-24-2	18	0.0084846	0.00148749	-0.0069971	0.175317	1.36517e-08	6.55283e-08	UCEC
hsa-mir-151a	49	0.0145125	0.0113991	-0.00311343	0.785466	3.65893e-05	0.000103311	UCEC
hsa-mir-1260b	18	0.972509	0.980104	0.00759462	1.00781	0.0162321	0.0288571	UCEC
hsa-mir-301a	70	0.00475111	0.000186414	-0.00456469	0.039236	9.0263e-11	7.22104e-10	UCEC
hsa-mir-376a-1	9	0.11422	0.0461164	-0.0681038	0.40375	0.00350385	0.00731238	UCEC
hsa-mir-376a-1	49	0.850111	0.758451	-0.0916594	0.892179	0.014368	0.0265256	UCEC
hsa-mir-376a-2	55	0.865959	0.747222	-0.118736	0.862885	0.000425361	0.000972254	UCEC
hsa-mir-625	58	0.0620266	0.1063	0.0442733	1.71378	3.59881e-05	0.000103311	UCEC
hsa-mir-421	61	0.0383338	0.0160406	-0.0222932	0.418444	0.0132838	0.0255049	UCEC
hsa-mir-4662a	8	0.00601929	0.0023284	-0.00369089	0.386823	1.29995e-05	4.45699e-05	UCEC
hsa-mir-503	7	0.0173152	0.00637552	-0.0109397	0.368204	2.44756e-12	2.93707e-11	UCEC
hsa-mir-532	34	0.00155426	0.00125025	-0.000304007	0.804403	0.00040998	0.000972254	UCEC
hsa-mir-99a	13	0.00893202	0.00331362	-0.0056184	0.370982	2.47952e-15	5.95085e-14	UCEC
hsa-mir-99b	47	0.00276955	0.00122255	-0.001547	0.441426	2.96774e-05	9.49676e-05	UCEC
hsa-mir-98	32	0.0705139	0.0280635	-0.0424504	0.397985	4.12054e-10	2.47233e-09	UCEC

## Sheet: Table S5
	pv	classification
BLCA	5.64758e-17	0.969626
BRCA	3.71022e-57	0.927242
CHOL	3.90762e-09	1
COAD	4.05127e-14	1
ESCA	8.47109e-06	0.954315
HNSC	2.60655e-33	0.968254
KICH	8.51733e-13	1
KIRC	1.49133e-42	0.942078
KIRP	4.2078e-21	0.963077
LIHC	4.56179e-39	0.973934
LUAD	1.69256e-43	0.991055
LUSC	3.95033e-47	1
PCPG	0.00228003	1
PRAD	1.34672e-30	0.932234
READ	5.00508e-06	1
STAD	3.99743e-35	0.968553
THCA	5.54113e-31	0.925664
UCEC	1.80472e-25	0.977233
pv- p value
classification- classification accuracy of the model

## Sheet: Table S6
	Accuracy	Sensitivty	Specificity	Precision	Recall	AUC	p value
BLCA	0.962617	0.987775	0.421053	0.973494	0.987775	0.950071	0.286756
BRCA	0.919628	0.974954	0.346154	0.939231	0.974954	0.921168	0.192274
CHOL	0.933333	0.944444	0.888889	0.971429	0.944444	0.981481	0.0128858
COAD	0.997788	1	0.875	0.997753	1	1	0.00285544
ESCA	0.944162	0.994565	0.230769	0.948187	0.994565	0.774247	0.346194
HNSC	0.955908	0.978967	0.681818	0.973384	0.978967	0.940379	0.000935142
KICH	0.879121	0.878788	0.88	0.95082	0.878788	0.942424	0.000334432
KIRC	0.923339	0.959302	0.661972	0.953757	0.959302	0.938421	0.000324878
KIRP	0.929231	0.962199	0.647059	0.958904	0.962199	0.923691	0.0239779
LIHC	0.945498	0.97043	0.76	0.967828	0.97043	0.974785	6.00085e-06
LUAD	0.958855	0.980507	0.717391	0.974806	0.980507	0.894864	8.1239e-05
LUSC	0.967495	0.979079	0.844444	0.985263	0.979079	0.923245	7.11237e-07
PCPG	0.978022	0.977654	1	1	0.977654	0.993482	0.816669
PRAD	0.924908	0.975709	0.442308	0.943249	0.975709	0.924712	0.059286
READ	1	1	1	1	1	1	0.0484231
STAD	0.947589	0.974771	0.658537	0.968109	0.974771	0.942605	0.00366219
THCA	0.911504	0.964427	0.457627	0.938462	0.964427	0.929658	0.119587
UCEC	0.943958	0.97026	0.515152	0.97026	0.97026	0.952743	0.474776

## Sheet: Table S7
Cancer	mir	locus	median	median surv. low editing	median surv. high editing	N low editing	N high editing	mean editing low	mean editing high	p value	corrected p	Longer Survival
ACC	hsa-mir-411	20	0.076087	1355	NA	30	31	0.0410375	0.144673	0.01532	0.148093	high editing
ACC	hsa-mir-151a	49	0.0130231	1750	NA	40	40	0.00849137	0.0281585	0.02888	0.165252	high editing
ACC	hsa-mir-376a-1	49	0.506	1750	NA	28	28	0.355498	0.648155	0.01458	0.148093	high editing
ACC	hsa-mir-376a-2	15	0.0871212	1204	NA	21	21	0.0337211	0.25733	0.03419	0.165252	high editing
ACC	hsa-mir-532	34	0.000856996	2105	NA	40	40	0.000498801	0.00195729	0.03071	0.165252	high editing
ACC	hsa-mir-381	52	0.313525	1750	NA	40	40	0.231045	0.417825	0.00784	0.148093	high editing
ACC	hsa-mir-381	55	0.00998089	2105	NA	40	40	0.00571187	0.0148143	0.04513	0.186967	high editing
BLCA	hsa-let-7c	27	0.0470947	795	3183	202	205	0.0178581	0.194292	0.00335	0.051925	high editing
BLCA	hsa-mir-378a	58	0.00974745	2954	734	204	203	0.00561608	0.0529246	0.0004	0.0124	low editing
BLCA	hsa-mir-378b	53	1	374	3183	2	60	0.961111	1	0.0074	0.0764667	high editing
CESC	hsa-mir-378b	53	1	829	NA	4	66	0.936329	1	0.00365	0.09536	high editing
CESC	hsa-mir-381	52	0.369349	2052	NA	153	153	0.316127	0.418077	0.00596	0.09536	high editing
COAD	hsa-mir-379	10	0.00757673	3042	1881	220	221	0.00523575	0.0113408	0.00901	0.11713	low editing
COAD	hsa-mir-376a-2	55	0.785714	972	1910	40	42	0.645598	0.868876	0.00602	0.11713	high editing
ESCA	hsa-mir-556	60	0.0909091	171	NA	5	6	0.0278846	0.101136	0.00266	0.06916	high editing
HNSC	hsa-mir-200b	61	0.00443319	1972	1289	259	262	0.00256245	0.00893827	0.01566	0.10962	low editing
HNSC	hsa-mir-376a-2	55	0.737986	580	1748	89	88	0.584238	0.837531	0.00462	0.04312	high editing
HNSC	hsa-mir-99a	13	0.00413223	2083	1134	260	261	0.00199736	0.00770322	0.0026	0.0364	low editing
HNSC	hsa-mir-381	52	0.317726	1134	2083	259	262	0.25521	0.375949	0.00058	0.01624	high editing
KIRC	hsa-mir-379	10	0.0232558	2256	NA	255	257	0.0128823	0.0401426	0.00358	0.0895	high editing
KIRC	hsa-mir-200b	61	0.0134262	NA	2564	256	257	0.00750509	0.0269868	0.04747	0.197792	low editing
KIRC	hsa-mir-1260b	18	1	NA	3554	57	143	0.922891	1	0.01925	0.142875	low editing
KIRC	hsa-mir-376a-2	55	0.632609	640.5	NA	4	4	0.436179	0.837879	0.02286	0.142875	high editing
KIRC	hsa-mir-376c	48	0.0909091	1337	NA	39	40	0.0343133	0.178504	0.01231	0.142875	high editing
KIRC	hsa-mir-381	52	0.349206	2256	NA	237	239	0.278297	0.42767	0.03091	0.15455	high editing
KIRP	hsa-mir-376c	48	0.117143	1468	2941	40	40	0.0617154	0.220505	0.00073	0.0219	high editing
LGG	hsa-mir-664a	18	0.0526316	1891	2988	231	251	0.0186374	0.0986611	2e-05	0.00082	high editing
LGG	hsa-mir-539	18	0.0687965	1915	3470	243	244	0.0407145	0.0995219	0.0159	0.13038	high editing
LGG	hsa-mir-151a	49	0.0491215	2000	3978	255	255	0.033449	0.0730854	0.00348	0.04756	high editing
LGG	hsa-mir-376a-1	49	0.705882	1585	2835	116	117	0.600008	0.807399	0.00476	0.04879	high editing
LGG	hsa-mir-532	34	0.00284495	1933	3571	255	255	0.00176619	0.00470726	0.00118	0.02419	high editing
LUAD	hsa-mir-497	25	0.0361101	1209	1798	254	249	0.0163637	0.0783198	0.00051	0.00816	high editing
LUAD	hsa-mir-379	10	0.0183968	1197	1531	251	253	0.0117868	0.0311866	0.00538	0.0573867	high editing
LUAD	hsa-mir-376c	48	0.138889	1229	1790	153	160	0.0700032	0.232062	0.01638	0.13104	high editing
LUAD	hsa-mir-99a	13	0.0260223	1209	2027	253	251	0.0141311	0.0508077	0.00038	0.00816	high editing
LUAD	hsa-mir-381	52	0.354269	1268	1531	252	251	0.29563	0.411954	0.03095	0.19808	high editing
LUSC	hsa-mir-99a	13	0.0101862	2160	1190	235	237	0.00494758	0.0268298	0.00433	0.13423	low editing
SARC	hsa-mir-301b	64	0.0357143	688	2464	29	30	0.00332473	0.0990792	0.00706	0.0558	high editing
SARC	hsa-mir-589	66	0.714286	1825	2324	110	115	0.569377	0.819449	0.03708	0.170063	high editing
SARC	hsa-mir-376a-1	9	0.0231407	1235	2575	55	55	0.00340421	0.067696	0.04535	0.170063	high editing
SARC	hsa-mir-376a-1	49	0.557201	1424	NA	71	71	0.409418	0.67666	0.00217	0.03255	high editing
SARC	hsa-mir-376a-2	15	0.0714286	995	NA	24	25	0.0166855	0.191032	0.00046	0.0138	high editing
SARC	hsa-mir-376a-2	55	0.579514	1366	NA	72	72	0.432661	0.695494	0.00744	0.0558	high editing
SARC	hsa-mir-376c	48	0.0680628	1536	2575	86	87	0.0367215	0.143723	0.04119	0.170063	high editing
SARC	hsa-mir-381	52	0.333333	1466	2575	124	129	0.242427	0.445624	0.01554	0.09324	high editing
THYM	hsa-mir-1304	57	0.0292565	NA	NA	62	61	0.0203742	0.071653	0.01572	0.125424	low editing
THYM	hsa-mir-200b	61	0.0176549	NA	NA	61	62	0.0125782	0.0488591	0.01608	0.125424	low editing
THYM	hsa-mir-589	66	0.545739	NA	3488	61	62	0.422752	0.696385	0.0007	0.0273	low editing
THYM	hsa-mir-625	58	0.0478884	NA	NA	61	62	0.0309227	0.106882	0.00648	0.08424	low editing
THYM	hsa-mir-532	34	0.00151592	NA	NA	61	62	0.00106406	0.00272488	0.00452	0.08424	low editing
UCEC	hsa-let-7c	27	0.0226079	3349	NA	269	268	0.0103413	0.072376	0.01122	0.1413	high editing
UCEC	hsa-mir-378a	58	0.00587453	NA	NA	269	268	0.00286054	0.0108613	0.01413	0.1413	low editing
UCEC	hsa-mir-1260b	18	0.987151	3349	NA	245	246	0.962431	0.997777	0.00056	0.0168	high editing
UVM	hsa-let-7c	27	0.0279227	NA	945	40	40	0.0148702	0.154088	0	0	low editing
UVM	hsa-let-7d	66	0.000450079	1581	1269	40	40	0.000236893	0.000815256	0.00325	0.039	low editing
UVM	hsa-mir-99a	13	0.0027376	1581	1314	40	40	0.00161962	0.00748715	0.00872	0.06976	low editing

## Sheet: Table S8
mir/targets	unedited targets	edited targets	shared targets	unedited only	edited only	% shared
hsa-miR-376a-2-5p	4284	5345	2062	2222	3283	27.2499
hsa-miR-376a-3p	5280	6209	2777	2503	3432	31.8756
hsa-miR-376c-3p	5995	7848	3832	2163	4016	38.2779
hsa-miR-381-3p	9147	7413	5468	3679	1945	49.2968
hsa-miR-411-5p	6891	6648	3644	3247	3004	36.8267
hsa-miR-497-5p	8599	7575	4974	3625	2601	44.4107
hsa-miR-589-3p	7628	8574	4868	2760	3706	42.9504
hsa-miR-6503-3p	4603	6059	2320	2283	3739	27.8111
hsa-miR-411-5p.2*	5122	4571	2171	2951	2400	28.862
*miR-411 has an alternative seed

## Sheet: Table S9
hsa-miR-376a-2-5p
© 2000-2017 QIAGEN. All rights reserved.
Canonical Pathways
Ingenuity Canonical Pathways	-log(p-value)	zScore	Ratio	Molecules
14-3-3-mediated Signaling	0		0.14	PLCB1,AKT3,STRADA,YWHAG,PLCB2,TNFRSF1A,PLCB4,MRAS,PIK3R1,AKT2,ELK1,PRKCA,CDKN1B,TP73,RPS6KA1,PLCG1,TSC1,FOXO1
4-1BB Signaling in T Lymphocytes	0		0.0645	IKBKB,NFKBIA
Acetone Degradation I (to Methylglyoxal)	0		0.115	CYP51A1,CYP3A4,CYP2C19
Actin Nucleation by ARP-WASP Complex	0		0.107	ARPC5,NCK2,MRAS,ARPC4,ARPC5L,RHOU
Activation of IRF by Cytosolic Pattern Recognition Receptors	0		0.1	TANK,LTA,IKBKB,CD40,IL6,NFKBIA
Acute Myeloid Leukemia Signaling	0		0.1	AKT3,TCF3,CSF2RB,LEF1,MRAS,CSF3R,PIK3R1,EIF4EBP1,AKT2
Acute Phase Response Signaling	0		0.155	SOCS5,AKT3,C3,TNFRSF1A,MRAS,IL36B,PIK3R1,IL6,NFKBIA,ELK1,FN1,IL1R1,F8,RBP5,F2,MAP3K7,TCF3,IKBKB,TRADD,AKT2,RBP2,APOA1,TAB1,SERPINE1,C1S,SERPING1
Acyl-CoA Hydrolysis	0		0.0909	THEM4,
Agranulocyte Adhesion and Diapedesis	0		0.149	CCL4L1/CCL4L2,CLDN10,GNAI1,CXCL12,CCL8,TNFRSF1A,SELL,IL36B,CCL16,PODXL,GLG1,FN1,IL1R1,C5AR1,MYH11,MYL2,CLDN18,CCL1,CCL11,MMP17,CCL22,SELPLG,MMP20,AOC3,JAM3,MMP24
Antiproliferative Role of Somatostatin Receptor 2	0		0.153	NPR1,RACK1,CDKN1B,MRAS,GNG4,CDKN1A,GNG7,RAP1B,GNG2,PIK3R1,ELK1
April Mediated Signaling	0		0.0789	IKBKB,NFKBIA,ELK1
Aspartate Degradation II	0		0.143	MDH1B,
Assembly of RNA Polymerase III Complex	0		0.0833	GTF3C4,
B Cell Activating Factor Signaling	0		0.1	TNFRSF13C,IKBKB,NFKBIA,ELK1
B Cell Receptor Signaling	0		0.154	PTEN,AKT3,CREB1,CALM1 (includes others),MRAS,CAMK2D,PIK3R1,NFKBIA,PPP3CC,ELK1,MALT1,INPP5B,OCRL,BCL10,SYNJ2,FOXO1,VAV3,MAP3K7,TCF3,INPP5F,PPP3CB,IKBKB,AKT2,MEF2C,CFL2,GAB2,MAP3K2,RAP1B
Bladder Cancer Signaling	0		0.128	FGF5,FGF12,MRAS,CDKN1A,FGF19,MMP20,SIN3A,MMP17,VEGFC,TP53,MMP24
Breast Cancer Regulation by Stathmin1	0		0.158	GNAI1,PPP2R5E,ARHGEF15,CALM1 (includes others),PLCB2,MRAS,LIMK1,GNG7,CAMK2D,PPP2R3A,PIK3R1,TP53,ARHGEF6,PPP1R3C,GNG4,E2F2,CDKN1A,ADCY2,ARHGEF18,PRKAR2A,PLCB1,LIMK2,ARHGEF10,RACK1,PLCB4,PAK1,PRKCA,CDKN1B,ARHGEF2,GNG2,ARHGEF9,ADCY9
Bupropion Degradation	0		0.125	CYP51A1,CYP3A4,CYP2C19
CD27 Signaling in Lymphocytes	0		0.0784	MAP3K7,MAP3K2,IKBKB,NFKBIA
CD40 Signaling	0		0.0909	TANK,MAP3K7,LTA,IKBKB,PIK3R1,CD40,NFKBIA
CDK5 Signaling	0		0.122	PPP2R5E,CDK5R1,PPP1R3C,MRAS,LAMC1,ADCY2,FOSB,PPP2R3A,BDNF,CABLES1,ADCY9,PRKAR2A
CNTF Signaling	0		0.05	MRAS,RPS6KA1,PIK3R1
CTLA4 Signaling in Cytotoxic T Lymphocytes	0		0.143	PPP2R5E,AKT3,CD3G,CLTC,PTPN22,B2M,PPP2R3A,PIK3R1,AKT2,HLA-A,CD28,PLCG1,AP2M1,CD86
Cell Cycle Regulation by BTG Family Proteins	0		0.143	PPP2R5E,BTG2,E2F2,HOXB9,PPP2R3A
Cell Cycle: G1/S Checkpoint Regulation	0		0.143	HDAC5,CDKN1B,SMAD3,E2F2,CDKN1A,SIN3A,HDAC11,FOXO1,TP53
Ceramide Degradation	0		0.143	NAAA,
Ceramide Signaling	0		0.118	S1PR2,PPP2R5E,AKT3,TNFRSF1A,CERK,MRAS,SPHK2,S1PR3,PPP2R3A,PIK3R1,AKT2
Cholecystokinin/Gastrin-mediated Signaling	0		0.129	PLCB1,PLCB2,PLCB4,MRAS,PXN,IL36B,BORCS8-MEF2B,MEF2C,ELK1,PRKCA,MEF2B,RHOU,MEF2A
Choline Biosynthesis III	0		0.154	PLD6,PLD1
Circadian Rhythm Signaling	0		0.0606	CREB1,PER2
Cleavage and Polyadenylation of Pre-mRNA	0		0.0833	CPSF6,
Colorectal Cancer Metastasis Signaling	0		0.157	AKT3,WNT5A,TNFRSF1A,MRAS,GNG7,PIK3R1,IL6,TP53,ARRB1,WNT8B,WNT2,SMAD3,GNG4,ADCY2,TGFBR1,FZD3,TLR6,TLR2,VEGFC,WNT3A,PRKAR2A,TCF3,RACK1,LEF1,WNT7B,WNT5B,MMP17,AKT2,MSH3,TLR3,MMP20,WNT4,GNG2,RHOU,MSH2,MMP24,ADCY9,WNT9A
Cyclins and Cell Cycle Regulation	0		0.156	PPP2R5E,HDAC5,MYT1,CCNH,CDKN1B,E2F2,CDKN1A,SIN3A,PPP2R3A,HDAC11,TP53,CCNB1
Cytotoxic T Lymphocyte-mediated Apoptosis of Target Cells	0		0.129	HLA-A,CD3G,B2M,FAS
Death Receptor Signaling	0		0.154	PARP12,TANK,MAP4K4,TNFRSF1A,LIMK1,IKBKB,TRADD,NFKBIA,ACIN1,NAIP,TNFRSF10A,GAS2,FAS,CASP2
Differential Regulation of Cytokine Production in Intestinal Epithelial Cells by IL-17A and IL-17F	0		0.0435	IL12A,
Differential Regulation of Cytokine Production in Macrophages and T Helper Cells by IL-17A and IL-17F	0		0.111	IL12A,IL6
Docosahexaenoic Acid (DHA) Signaling	0		0.115	AKT3,PNPLA2,PIK3R1,FOXO1,AKT2,ALOX15
Dolichyl-diphosphooligosaccharide Biosynthesis	0		0.0909	DPAGT1,
Dopamine Receptor Signaling	0		0.158	PPP2R5E,GCH1,SLC6A3,PPP1R3C,NCS1,ADCY2,PPP2R3A,QDPR,ADCY9,PCBD1,MAOA,PRKAR2A
EGF Signaling	0		0.0882	AKT3,PRKCA,PLCG1,PIK3R1,AKT2,ELK1
EIF2 Signaling	0		0.123	AKT3,RPL32,MRAS,EIF2B3,PIK3R1,EIF2B1,EIF4A3,EIF2B2,RPL27A,RPS6,SREBF1,EIF3A,PABPC1,INSR,RPL7L1,EIF1,AKT2,EIF5,RPS3,RPS12,EIF1AY,EIF2AK4,HSPA5,PPP1R15A,RPS4X,RPL15
Eicosanoid Signaling	0		0.154	PLA2G4E,LTB4R,PLA2G16,PLA2G4F,PNPLA8,HPGDS,PTGES,PLA2R1,ALOX15,PTGIS
Endometrial Cancer Signaling	0		0.125	PTEN,AKT3,LEF1,MRAS,PIK3R1,AKT2,TP53,ELK1
Endothelin-1 Signaling	0		0.137	GNAI1,PLA2G4E,PLCB2,GNAO1,PLA2G16,MRAS,PLD1,PIK3R1,ECE1,ADCY2,PNPLA8,NOS3,CASP2,ECE2,PLCB1,PLCB4,PLA2G4F,SHC3,PRKCA,PLD6,CASP5,PLCG1,GNAT1,ADCY9,PLA2R1
Ephrin A Signaling	0		0.15	EPHA10,PAK1,LIMK1,EPHA3,EFNA5,PIK3R1,CFL2,EFNA2,VAV3
ErbB Signaling	0		0.124	PAK2,PRKCA,NCK2,MRAS,PAK1,PLCG1,NRG2,PAK4,PIK3R1,FOXO1,ELK1,NRG4
ErbB2-ErbB3 Signaling	0		0.118	PTEN,CDKN1B,MRAS,NRG2,PIK3R1,FOXO1,ELK1,NRG4
ErbB4 Signaling	0		0.1	PRKCA,MRAS,PLCG1,NRG2,PIK3R1,NRG4,PSEN1
Erythropoietin Signaling	0		0.114	EPO,AKT3,PRKCA,MRAS,PLCG1,PIK3R1,NFKBIA,AKT2,ELK1
Estrogen Biosynthesis	0		0.105	HSD17B13,CYP51A1,CYP3A4,CYP2C19
Estrogen-Dependent Breast Cancer Signaling	0		0.104	AKT3,CREB1,MRAS,HSD17B13,PIK3R1,AKT2,ESR1,ELK1
Ethanol Degradation II	0		0.156	ALDH1A2,ALDH3B1,ALDH1L2,ADH6,ALDH1B1
FGF Signaling	0		0.133	FGF5,FGF12,AKT3,PRKCA,CREB1,CRKL,FGF19,MET,PLCG1,CRK,PIK3R1,AKT2
FLT3 Signaling in Hematopoietic Progenitor Cells	0		0.11	AKT3,GAB2,CREB1,MRAS,RPS6KA1,PIK3R1,EIF4EBP1,AKT2,ELK1
FXR/RXR Activation	0		0.136	FOXA3,AKT3,SREBF1,C3,FGF19,IL36B,SLC10A2,NR5A2,APOC3,AKT2,APOB,FOXA1,RXRA,APOA1,FOXO1,APOL1,G6PC2
Fatty Acid β-oxidation I	0		0.1	ACSL4,SLC27A1,ACSL6
Fc Epsilon RI Signaling	0		0.118	PLA2G4E,AKT3,INPP5F,MRAS,PLA2G4F,PIK3R1,AKT2,MS4A2,INPP5B,OCRL,PRKCA,SYNJ2,PLCG1,VAV3
FcγRIIB Signaling in B Lymphocytes	0		0.0566	DOK1,MRAS,PIK3R1
GADD45 Signaling	0		0.158	CDKN1A,TP53,CCNB1
GDNF Family Ligand-Receptor Interactions	0		0.0921	GDNF,DOK1,CREB1,MRAS,GFRA2,PLCG1,PIK3R1
GM-CSF Signaling	0		0.151	HCK,AKT3,RACK1,CSF2RB,MRAS,PPP3CB,CAMK2D,PIK3R1,PPP3CC,AKT2,ELK1
GNRH Signaling	0		0.142	PLCB1,GNAI1,MAP3K7,PAK2,CREB1,PLCB2,PLCB4,MRAS,PAK1,CAMK2D,ELK1,PRKCA,FSHB,MAP3K2,ADCY2,PAK4,ADCY9,PRKAR2A
GPCR-Mediated Integration of Enteroendocrine Signaling Exemplified by an L Cell	0		0.155	PLCB1,GNAI1,PLCB2,PLCB4,ADRB1,PLCG1,ADCY2,GRPR,ADCY9,PRKAR2A,GIPR
Gap Junction Signaling	0		0.145	PLCB1,GNAI1,CSNK1A1,LPAR1,AKT3,NPR1,PLCB2,PLCB4,MRAS,ADRB1,PRKG1,PPP3CB,PIK3R1,PPP3CC,AKT2,PRKCA,MAP3K2,SP3,PLCG1,ADCY2,CSNK1G1,ADCY9,HTR2A,PRKAR2A
Germ Cell-Sertoli Cell Junction Signaling	0		0.124	MAP3K7,PAK2,LAMC3,EPN2,LIMK2,TNFRSF1A,MRAS,PAK1,NECTIN2,LIMK1,PXN,FER,PIK3R1,MTMR2,CFL2,MAP3K2,MYO7A,TGFBR1,PAK4,ACTN4,RHOU
Glioma Invasiveness Signaling	0		0.1	F2R,MRAS,TIMP3,ITGB3,PIK3R1,RHOU,TIMP2
Glioma Signaling	0		0.156	PDGFRB,PDGFD,PTEN,AKT3,CALM1 (includes others),PDGFRA,MRAS,CAMK2D,PIK3R1,AKT2,TP53,IGF2R,PRKCA,E2F2,CDKN1A,SIN3A,PLCG1
Glucocorticoid Biosynthesis	0		0.125	HSD3B7,
Gluconeogenesis I	0		0.12	MDH1B,ME2,FBP2
Glutaryl-CoA Degradation	0		0.133	GCDH,L3HYPDH
Glutathione Redox Reactions I	0		0.0455	GPX5,
Glutathione-mediated Detoxification	0		0.0833	GSTM4,HPGDS
Glycine Betaine Degradation	0		0.1	SARDH,
Glycoaminoglycan-protein Linkage Region Biosynthesis	0		0.143	B4GALT7,
Glycogen Degradation III	0		0.154	PGM2,PGM3
Glycolysis I	0		0.0833	FBP2,PFKL
Graft-versus-Host Disease Signaling	0		0.159	HLA-A,CD28,HLA-DOA,IL36B,FAS,IL6,CD86
Granulocyte Adhesion and Diapedesis	0		0.152	CCL4L1/CCL4L2,CLDN10,GNAI1,CXCL12,CCL8,TNFRSF1A,SELL,CSF3R,IL36B,CCL16,GLG1,IL1R1,C5AR1,IL1RL2,ITGB3,CLDN18,CCL1,CCL11,MMP17,CCL22,SELPLG,MMP20,JAM3,MMP24,HRH2
Granzyme A Signaling	0		0.0588	APEX1,
Growth Hormone Signaling	0		0.0988	SOCS5,PRKCA,SLC2A4,GHR,RPS6KA1,PLCG1,PIK3R1,ELK1
Gustation Pathway	0		0.149	PDE12,LPAR6,PDE4A,PLCB2,GNG7,PDE1B,TAS2R20,PDE2A,PLD6,PDE7B,SCNN1B,P2RY2,PDE1C,ADCY2,GNG2,APEX1,ADCY9,PRKAR2A
HER-2 Signaling in Breast Cancer	0		0.148	AKT3,MRAS,PIK3R1,AKT2,TP53,PRKCA,CDKN1B,PARD6B,CDKN1A,PLCG1,ITGB3,TSC1,FOXO1
HGF Signaling	0		0.158	MAP3K7,AKT3,CRKL,MRAS,PAK1,PXN,PIK3R1,IL6,AKT2,ELK1,ELF1,PRKCA,MAP3K2,CDKN1A,ELF4,RAP1B,MET,PLCG1
HIPPO signaling	0		0.116	PATJ,PPP2R5E,AMOT,LLGL1,YWHAG,PPP1R3C,LATS2,SMAD3,TEAD1,PPP2R3A
HMGB1 Signaling	0		0.107	AGER,AKT3,IL12A,TNFRSF1A,MRAS,LTA,PIK3R1,IL6,AKT2,ELK1,IL11,IL1R1,SERPINE1,RHOU
Heme Biosynthesis II	0		0.111	FECH,
Hepatic Cholestasis	0		0.159	IL12A,TNFRSF1A,TIRAP,FGF19,SLCO3A1,IL36B,NR5A2,IL6,NFKBIA,HSD3B7,IL11,IL1R1,IL1RL2,RXRA,ADCY2,ESR1,PRKAR2A,MAP3K7,SREBF1,LTA,INSR,IKBKB,SLC10A2,PRKCA,ADCY9
Hepatic Fibrosis / Hepatic Stellate Cell Activation	0		0.16	CCR7,PDGFD,TNFRSF1A,KLF12,COL27A1,COL4A4,COL1A1,CD40,IL6,FN1,IL1R1,SMAD3,ECE1,MYH11,IL1RL2,MET,TGFBR1,VEGFC,PDGFRB,COL4A1,PDGFRA,MYL2,COL21A1,COL22A1,TIMP2,CSF1,LEP,SERPINE1,FAS
Histidine Degradation VI	0		0.154	HAL,MICAL3
IGF-1 Signaling	0		0.123	GRB10,SOCS5,AKT3,YWHAG,MRAS,PXN,PIK3R1,AKT2,ELK1,NEDD4,FOXO1,PRKAR2A,IGFBP6
IL-12 Signaling and Production in Macrophages	0		0.111	AKT3,IL12A,IKBKB,PIK3R1,CD40,APOC3,AKT2,LYZ,APOB,PRKCA,RXRA,APOA1,TLR2,APOL1,ALOX15,IL12RB1
IL-15 Production	0		0.111	PTK6,IL6,TXK
IL-15 Signaling	0		0.0789	AKT3,MRAS,PLCG1,PIK3R1,IL6,AKT2
IL-17 Signaling	0		0.106	MAP3K7,IL17RA,AKT3,MRAS,CCL11,PIK3R1,IL6,AKT2,ELK1
IL-17A Signaling in Airway Cells	0		0.13	MAP3K7,IL17RA,PTEN,AKT3,IKBKB,CCL11,PIK3R1,IL6,NFKBIA,AKT2
IL-17A Signaling in Fibroblasts	0		0.143	MAP3K7,IL17RA,IKBKB,IL6,NFKBIA
IL-17A Signaling in Gastric Cells	0		0.04	IL17RA,
IL-2 Signaling	0		0.0781	AKT3,MRAS,PIK3R1,AKT2,ELK1
IL-22 Signaling	0		0.0833	AKT3,AKT2
IL-4 Signaling	0		0.116	INPP5B,OCRL,AKT3,HLA-A,HLA-DOA,INPP5F,MRAS,SYNJ2,PIK3R1,AKT2
IL-6 Signaling	0		0.126	MAP3K7,MAP4K4,AKT3,TNFRSF1A,MRAS,IL36B,IKBKB,COL1A1,PIK3R1,IL6,NFKBIA,AKT2,ELK1,IL1R1,IL1RL2,TAB1
IL-8 Signaling	0		0.122	GNAI1,MAP4K4,PAK2,AKT3,LIMK2,PLCB2,RACK1,MRAS,MYL2,LIMK1,GNG7,IKBKB,PLD1,PIK3R1,LASP1,AKT2,PRKCA,GNG4,PLD6,ITGB3,GNG2,EIF4EBP1,VEGFC,RHOU
IL-9 Signaling	0		0.0222	PIK3R1,
ILK Signaling	0		0.13	PPP2R5E,PTEN,AKT3,CREB1,TNFRSF1A,LIMS2,PPP2R3A,PIK3R1,SNAI1,FN1,ARHGEF6,MYH11,ITGB3,ACTN4,VEGFC,LEF1,MYL2,PXN,PARVB,AKT2,CFL2,KRT18,HIF1A,NCK2,RHOU
Induction of Apoptosis by HIV1	0		0.136	NAIP,TNFRSF1A,IKBKB,FAS,TRADD,NFKBIA,SLC25A13,TP53
Inflammasome pathway	0		0.143	NAIP,CASP5,PYCARD
Inhibition of Angiogenesis by TSP1	0		0.156	AKT3,NOS3,TGFBR1,AKT2,TP53
Inhibition of Matrix Metalloproteases	0		0.132	TIMP3,MMP20,MMP17,TIMP2,MMP24
Interferon Signaling	0		0.0278	IFIT1,
Isoleucine Degradation I	0		0.143	ACADSB,BCAT2
JAK/Stat Signaling	0		0.0964	SOCS5,AKT3,MRAS,CDKN1A,PIK3R1,IL6,AKT2,PTPN1
LPS-stimulated MAPK Signaling	0		0.105	MAP3K7,PRKCA,CREB1,MRAS,PAK1,IKBKB,PIK3R1,NFKBIA,ELK1
LXR/RXR Activation	0		0.157	SREBF1,C3,TNFRSF1A,ABCG1,IL36B,IL6,APOC3,LYZ,APOB,LDLR,IL1R1,TLR3,ARG2,IL1RL2,RXRA,APOA1,CYP51A1,NCOR1,APOL1
Leucine Degradation I	0		0.111	BCAT2,
Leukocyte Extravasation Signaling	0		0.141	CLDN10,GNAI1,CXCL12,NCF1,PIK3R1,DLC1,ITGB3,CRK,ACTN4,VAV3,JAM2,CTTN,CRKL,ARHGAP35,CLDN18,PXN,ARHGAP1,FER,MMP17,TXK,TIMP2,PRKCA,SELPLG,TIMP3,RAP1B,MMP20,PLCG1,JAM3,MMP24
Lipid Antigen Presentation by CD1	0		0.125	CANX,B2M,AP2M1
Lymphotoxin β Receptor Signaling	0		0.119	AKT3,TNFSF14,LTA,IKBKB,TRAF4,PIK3R1,NFKBIA,AKT2
MIF Regulation of Innate Immunity	0		0.0976	PLA2G4E,PLA2G4F,NFKBIA,TP53
MIF-mediated Glucocorticoid Regulation	0		0.0909	PLA2G4E,PLA2G4F,NFKBIA
MSP-RON Signaling Pathway	0		0.102	IL12A,CSF2RB,CSF1,KLK3,PIK3R1,TLR2
Macropinocytosis Signaling	0		0.136	PDGFD,PRKCA,USP6NL,MRAS,PAK1,CSF1,MET,PLCG1,ITGB3,PIK3R1,ACTN4
Mechanisms of Viral Exit from Host Cells	0		0.0976	NEDD4,PRKCA,SH3GLB1,VPS28
Melanocyte Development and Pigmentation Signaling	0		0.137	CREB1,MRAS,PIK3R1,MC1R,SOX10,RPS6KA1,PLCG1,ADCY2,TYRP1,CRK,POMC,ADCY9,PRKAR2A
Melanoma Signaling	0		0.127	PTEN,AKT3,MRAS,CDKN1A,PIK3R1,AKT2,TP53
Melatonin Degradation I	0		0.0727	CYP51A1,CYP3A4,CYP2C19,CSGALNACT1
Melatonin Signaling	0		0.159	PLCB1,GNAI1,PRKCA,CALM1 (includes others),PLCB2,SLC2A4,GNAO1,PLCB4,CAMK2D,PLCG1,PRKAR2A
Methylglyoxal Degradation III	0		0.0909	AKR1C1/AKR1C2,
Mevalonate Pathway I	0		0.0833	IDI2,
Mineralocorticoid Biosynthesis	0		0.143	HSD3B7,
Mitochondrial Dysfunction	0		0.133	ATP5S,PINK1,GLRX2,CPT1A,NDUFA4L2,ATP5I,COX5B,ATP5G1,COX6B2,BACE2,COX6B1,NDUFA3,UQCR11,NDUFA11,ATP5A1,ACO1,NDUFS6,NDUFB5,ATPAF2,TXNRD2,MAOA,PSEN1
Mitotic Roles of Polo-Like Kinase	0		0.111	PPP2R5E,CHEK2,HSP90B1,SMC1A,PPP2R3A,CCNB1,ANAPC1
Myc Mediated Apoptosis Signaling	0		0.1	AKT3,YWHAG,MRAS,PIK3R1,FAS,AKT2,TP53
NAD Phosphorylation and Dephosphorylation	0		0.1	ACP2,
NF-κB Activation by Viruses	0		0.105	AKT3,PRKCA,MRAS,IKBKB,CD4,ITGB3,PIK3R1,NFKBIA,AKT2
NGF Signaling	0		0.129	MAP3K7,AKT3,CREB1,MRAS,IKBKB,PIK3R1,AKT2,TP53,ELK1,MAP3K2,RAP1B,RPS6KA1,PLCG1,CRK,TRAF4
NRF2-mediated Oxidative Stress Response	0		0.116	MAP3K7,DNAJB1,CBR1,DNAJC17,DNAJC16,MRAS,DNAJC5,NQO2,TXNRD1,PIK3R1,DNAJC14,DNAJC3,SOD3,FKBP5,PRKCA,DNAJA3,DNAJC18,AOX1,GSTM4,MAFG,FTH1,FOSL1
Natural Killer Cell Signaling	0		0.125	PAK2,AKT3,INPP5F,MRAS,PAK1,PIK3R1,AKT2,INPP5B,OCRL,PRKCA,SYNJ2,PLCG1,PAK4,SH2D1A,VAV3
Neuropathic Pain Signaling In Dorsal Horn Neurons	0		0.133	PLCB1,CREB1,PLCB2,PLCB4,CAMK2D,PIK3R1,ELK1,KCNQ2,GRIA3,PRKCA,GRM4,PLCG1,BDNF,KCNQ3,PRKAR2A
Neuroprotective Role of THOP1 in Alzheimer's Disease	0		0.15	IDE,HLA-A,CREB1,ECE1,ECE2,PRKAR2A
Neurotrophin/TRK Signaling	0		0.0921	CREB1,MRAS,RPS6KA1,PLCG1,KLK3,PIK3R1,BDNF
Nicotine Degradation II	0		0.151	AOX1,CYP51A1,CYP3A4,CYP2C19,CSGALNACT1,INMT,FMO3,FMO2
Nicotine Degradation III	0		0.106	AOX1,CYP51A1,CYP3A4,CYP2C19,CSGALNACT1
Non-Small Cell Lung Cancer Signaling	0		0.117	AKT3,PRKCA,MRAS,RXRA,SIN3A,PLCG1,PIK3R1,AKT2,TP53
Notch Signaling	0		0.135	MFNG,HEY2,RFNG,NOTCH2,PSEN1
OX40 Signaling Pathway	0		0.13	HLA-DPB1,HLA-A,HLA-DOA,CD3G,CD4,B2M,NFKBIA
Oncostatin M Signaling	0		0.0882	MRAS,TIMP3,ELK1
Oxidative Phosphorylation	0		0.125	ATP5S,ATP5I,COX5B,ATP5G1,COX6B2,COX6B1,NDUFA3,UQCR11,NDUFA11,ATP5A1,NDUFS6,NDUFB5,ATPAF2
P2Y Purigenic Receptor Signaling Pathway	0		0.153	PLCB1,GNAI1,AKT3,CREB1,PLCB2,RACK1,PLCB4,MRAS,GNG7,PIK3R1,AKT2,PRKCA,GNG4,P2RY2,PLCG1,ADCY2,ITGB3,GNG2,ADCY9,PRKAR2A
Pancreatic Adenocarcinoma Signaling	0		0.127	AKT3,PLD1,PIK3R1,AKT2,TP53,ELK1,RALBP1,CDKN1B,SMAD3,E2F2,PLD6,CDKN1A,SIN3A,TGFBR1,VEGFC
Pathogenesis of Multiple Sclerosis	0		0.111	CCR1,
Paxillin Signaling	0		0.118	PAK2,MRAS,PAK1,PXN,ITGA11,PIK3R1,ITGA9,ARHGEF6,NCK2,ITGB3,CRK,PAK4,ACTN4
Phagosome Formation	0		0.113	PLCB1,PLCB2,PLCB4,FCAMR,PIK3R1,FN1,PRKCA,TLR3,PLCG1,TLR6,TLR2,RHOU,PLA2R1
Phagosome Maturation	0		0.149	CTSS,ATP6V0D2,ATP6V1C2,SNAP25,STX16,B2M,ATP6V1C1,RAB5C,CTSH,HLA-A,VTI1A,RAB5B,VAMP3,ATP6AP1L,VPS33A,VPS28,CANX,VPS41,DYNC1LI2,TPO
Phenylalanine Degradation IV (Mammalian, via Side Chain)	0		0.0714	MAOA,
Phosphatidylcholine Biosynthesis I	0		0.143	CHKA,
Phototransduction Pathway	0		0.157	OPN4,CNGB1,RCVRN,GNGT1,OPN5,GNAT1,RHO,PRKAR2A
Polyamine Regulation in Colon Cancer	0		0.0455	PSMF1,
Pregnenolone Biosynthesis	0		0.1	MICAL3,
Production of Nitric Oxide and Reactive Oxygen Species in Macrophages	0		0.125	PPP2R5E,MAP3K7,AKT3,TNFRSF1A,NCF1,IKBKB,PPP2R3A,PIK3R1,NFKBIA,APOC3,AKT2,LYZ,APOB,PRKCA,PPP1R3C,MAP3K2,ARG2,RAP1B,APOA1,PLCG1,SIRPA,TLR2,RHOU,APOL1
Prolactin Signaling	0		0.0602	SOCS5,PRKCA,MRAS,PLCG1,PIK3R1
Pyrimidine Ribonucleotides De Novo Biosynthesis	0		0.14	UMPS,NME3,AK9,CAD,AK5,CTPS1
Pyrimidine Ribonucleotides Interconversion	0		0.0976	NME3,AK9,AK5,CTPS1
RANK Signaling in Osteoclasts	0		0.131	MAP3K7,AKT3,CALM1 (includes others),CHP1,PPP3CB,IKBKB,PIK3R1,NFKBIA,PPP3CC,AKT2,ELK1,MAP3K2,TNFRSF11A
RAR Activation	0		0.155	PTEN,AKT3,GTF2H3,PBRM1,ZBTB16,RDH13,PIK3R1,ALDH1A2,SMAD3,NT5C1B,RXRA,ADCY2,SDR9C7,NCOR1,RBP5,PRKAR2A,ERCC2,CSF2RB,MED1,SDR16C5,NR2F6,AKT2,NRIP2,PRKCA,CCNH,ARID2,RBP2,RDH10,ADCY9
Reelin Signaling in Neurons	0		0.13	ARHGEF15,DAB1,HCK,CDK5R1,ARHGEF6,ARHGEF10,CRKL,ARHGEF2,ITGB3,ARHGEF9,PIK3R1,CNR2
Regulation of Actin-based Motility by Rho	0		0.138	ARPC5,PAK2,MYL2,ARPC4,PAK1,LIMK1,MYLK,PIP5K1C,ARPC5L,PAK4,PIP5K1B,RHOU
Regulation of eIF4 and p70S6K Signaling	0		0.123	PPP2R5E,RPS6,AKT3,EIF3A,MRAS,PABPC1,EIF2B3,PPP2R3A,PIK3R1,EIF1,AKT2,RPS3,RPS12,EIF1AY,EIF2B1,RPS4X,EIF4A3,EIF2B2,EIF4EBP1
Remodeling of Epithelial Adherens Junctions	0		0.106	ARPC5,RAB5C,RAB5B,ARPC4,MET,ARPC5L,ACTN4
Renin-Angiotensin Signaling	0		0.101	PAK2,PRKCA,MRAS,PAK1,PLCG1,ADCY2,PAK4,PIK3R1,ADCY9,ELK1,PRKAR2A,SHC3
Retinoic acid Mediated Apoptosis Signaling	0		0.0517	PARP12,TNFRSF10A,RXRA
Role of Cytokines in Mediating Communication between Immune Cells	0		0.0577	IL12A,IL36B,IL6
Role of Hypercytokinemia/hyperchemokinemia in the Pathogenesis of Influenza	0		0.0976	IL12A,CCR1,IL36B,IL6
Role of IL-17A in Arthritis	0		0.0597	IL17RA,RPS6KA1,PIK3R1,NFKBIA
Role of IL-17A in Psoriasis	0		0.0769	IL17RA,
Role of IL-17F in Allergic Inflammatory Airway Diseases	0		0.122	IL11,IL17RA,CREB1,RPS6KA1,IL6
Role of JAK family kinases in IL-6-type Cytokine Signaling	0		0.04	IL6,
Role of JAK1 and JAK3 in γc Cytokine Signaling	0		0.058	IL7R,MRAS,FES,PIK3R1
Role of JAK2 in Hormone-like Cytokine Signaling	0		0.156	EPO,SOCS5,GHR,SIRPA,PTPN1
Role of MAPK Signaling in the Pathogenesis of Influenza	0		0.143	PLA2G4E,AKT3,PRKCA,RABGEF1,PLA2G16,MRAS,PLA2G4F,PNPLA8,AKT2,PLA2R1
Role of PI3K/AKT Signaling in the Pathogenesis of Influenza	0		0.11	GNAI1,ZNF346,AKT3,CRKL,CRK,PIK3R1,NFKBIA,AKT2
Role of PKR in Interferon Induction and Antiviral Response	0		0.15	MAP3K7,TLR3,TNFRSF1A,IKBKB,NFKBIA,TP53
Role of Pattern Recognition Receptors in Recognition of Bacteria and Viruses	0		0.107	IL12A,CREB1,C3,LTA,C1QB,OAS2,PIK3R1,IL6,IL11,PRKCA,TLR3,C5AR1,TLR6,TLR2
Role of RIG1-like Receptors in Antiviral Innate Immunity	0		0.0732	TANK,IKBKB,NFKBIA
Role of p14/p19ARF in Tumor Suppression	0		0.0476	PIK3R1,TP53
SAPK/JNK Signaling	0		0.136	MAP3K7,MAP4K4,CRKL,MRAS,GNG7,PIK3R1,TRADD,TP53,ELK1,MAP3K2,TAB1,CRK,GNG2,DUSP4
Salvage Pathways of Pyrimidine Deoxyribonucleotides	0		0.125	AICDA,
Serotonin Degradation	0		0.111	ALDH1A2,ALDH3B1,ALDH1L2,ADH6,ALDH1B1,CSGALNACT1,MAOA
Sertoli Cell-Sertoli Cell Junction Signaling	0		0.139	CLDN10,MAP3K7,JAM2,PTEN,AKT3,EPN2,NECTIN1,TNFRSF1A,MRAS,CLDN18,PRKG1,NECTIN2,SPTBN2,MTMR2,MAGI2,AKT2,ELK1,EPB41,MAP3K2,MYO7A,JAM3,NOS3,ACTN4,PRKAR2A
Small Cell Lung Cancer Signaling	0		0.131	PTEN,AKT3,CDKN1B,RXRA,SIN3A,IKBKB,TRAF4,PIK3R1,NFKBIA,AKT2,TP53
Sphingosine and Sphingosine-1-phosphate Metabolism	0		0.111	NAAA,
Sphingosine-1-phosphate Signaling	0		0.156	PLCB1,GNAI1,S1PR2,PDGFRB,PDGFD,AKT3,PLCB2,PDGFRA,PLCB4,S1PR3,PIK3R1,AKT2,NAAA,CASP5,PLCG1,ADCY2,CASP2,RHOU,ADCY9
Sucrose Degradation V (Mammalian)	0		0.125	TKFC,
Superpathway of Cholesterol Biosynthesis	0		0.148	DHCR24,CYP51A1,SC5D,IDI2
Superpathway of Geranylgeranyldiphosphate Biosynthesis I (via Mevalonate)	0		0.0625	IDI2,
Superpathway of Melatonin Degradation	0		0.0833	CYP51A1,CYP3A4,CYP2C19,CSGALNACT1,MAOA
Superpathway of Serine and Glycine Biosynthesis I	0		0.143	PHGDH,
Systemic Lupus Erythematosus Signaling	0		0.101	AKT3,CD3G,CD72,MRAS,IL36B,BDKRB2,LSM4,PIK3R1,CD40,IL6,LSM12,AKT2,LSM5,LSM10,HLA-A,CD28,SNRNP35,TNFRSF13C,PLCG1,SNRPD3,LSM3,CD86
T Cell Receptor Signaling	0		0.157	CALM1 (includes others),CD3G,MRAS,PPP3CB,IKBKB,PIK3R1,NFKBIA,PPP3CC,TXK,ELK1,MALT1,PTPRH,CD28,BCL10,PLCG1,CD4,VAV3
TCA Cycle II (Eukaryotic)	0		0.087	MDH1B,ACO1
TR/RXR Activation	0		0.133	AKT3,SREBF1,MED1,ADRB1,PIK3R1,SLC2A1,AKT2,SLC16A3,LDLR,HIF1A,RXRA,AKR1C1/AKR1C2,NCOR1
TWEAK Signaling	0		0.121	NAIP,IKBKB,TRADD,NFKBIA
Tec Kinase Signaling	0		0.125	GNAI1,HCK,PAK2,GNAO1,RACK1,MRAS,PAK1,GNG7,PIK3R1,TXK,MS4A2,TNFRSF10A,PRKCA,GNG4,PLCG1,GNG2,PAK4,GNAT1,FAS,RHOU,VAV3
Telomerase Signaling	0		0.157	POT1,PPP2R5E,HDAC5,AKT3,TERF2,MRAS,HSP90B1,PPP2R3A,PIK3R1,AKT2,TP53,ELF1,TERF1,TINF2,CDKN1A,ELF4,HDAC11
Th1 Pathway	0		0.138	HLA-DPB1,IL12A,HLA-DOA,CD3G,LTA,ICOSLG/LOC102723996,PIK3R1,CD40,IL6,NOTCH2,GATA3,HLA-A,CD28,RUNX3,CD4,CD86,PSEN1,IL12RB1
Th1 and Th2 Activation Pathway	0		0.139	IL12A,CCR1,PIK3R1,CD40,IL6,NOTCH2,GATA3,CD4,TGFBR1,CCR4,IL17RB,CD86,PSEN1,HLA-DPB1,HLA-DOA,CD3G,LTA,ICOSLG/LOC102723996,TIMD4,ACVR1B,BMPR2,HLA-A,CD28,RUNX3,IL12RB1
Th2 Pathway	0		0.158	HLA-DPB1,IL12A,HLA-DOA,CD3G,CCR1,ICOSLG/LOC102723996,PIK3R1,CD40,TIMD4,NOTCH2,ACVR1B,GATA3,BMPR2,HLA-A,CD28,RUNX3,CD4,TGFBR1,CCR4,IL17RB,CD86,PSEN1,IL12RB1
Thrombopoietin Signaling	0		0.0769	GAB2,PRKCA,MRAS,PLCG1,PIK3R1
Thyroid Hormone Metabolism II (via Conjugation and/or Degradation)	0		0.0294	CSGALNACT1,
Tumoricidal Function of Hepatic Natural Killer Cells	0		0.0417	FAS,
Type I Diabetes Mellitus Signaling	0		0.142	MAP3K7,SOCS5,IL12A,HLA-DOA,CD3G,TNFRSF1A,LTA,IKBKB,TRADD,NFKBIA,HLA-A,CD28,IL1R1,FAS,CD86
Type II Diabetes Mellitus Signaling	0		0.136	SLC27A1,MAP3K7,SOCS5,AKT3,TNFRSF1A,SLC2A2,INSR,IKBKB,PIK3R1,TRADD,NFKBIA,AKT2,ACSL6,ACSL4,PRKCA,SLC2A4,PRKAB2
UVA-Induced MAPK Signaling	0		0.099	PLCB1,PARP12,PRKCA,PLCB2,PLCB4,MRAS,RPS6KA1,PLCG1,PIK3R1,TP53
UVB-Induced MAPK Signaling	0		0.0909	HIST1H3C,PRKCA,H3F3A/H3F3B,PIK3R1,EIF4EBP1,TP53
UVC-Induced MAPK Signaling	0		0.0714	PRKCA,MRAS,TP53
Ubiquinol-10 Biosynthesis (Eukaryotic)	0		0.0588	MICAL3,
VEGF Family Ligand-Receptor Interactions	0		0.125	PLA2G4E,AKT3,PRKCA,MRAS,NRP1,PLA2G4F,PLCG1,NOS3,PIK3R1,AKT2,VEGFC
Valine Degradation I	0		0.111	ACADSB,BCAT2
Virus Entry via Endocytic Pathways	0		0.108	HLA-A,PRKCA,ITSN1,MRAS,CLTC,CD55,PLCG1,ITGB3,B2M,AP2M1,PIK3R1
Xenobiotic Metabolism Signaling	0		0.145	PPP2R5E,MRAS,NQO2,CAMK2D,CYP3A4,PPP2R3A,CYP2C19,PIK3R1,IL6,FMO2,MGMT,ALDH1A2,ALDH3B1,ALDH1L2,RXRA,ARNT,ALDH1B1,CHST1,FMO3,MAOA,HS3ST3B1,HDAC5,MAP3K7,CHST3,HS6ST3,ALDH3B2,NDST3,AHRR,MED1,HSP90B1,UST,ESD,SOD3,PRKCA,MAP3K2,CHST7,GSTM4,NDST4,HS3ST1
autophagy	0		0.154	CTSS,NBR1,CTSH,ATG5,VPS33A,VPS41,BECN1,MAP1LC3B
iNOS Signaling	0		0.093	CALM1 (includes others),IKBKB,TAB1,NFKBIA
mTOR Signaling	0		0.133	PPP2R5E,AKT3,MRAS,EIF4B,PPP2R3A,PLD1,PIK3R1,EIF4A3,TSC1,EIF4EBP1,VEGFC,PRR5L,RPS6,EIF3A,INSR,AKT2,RPS3,RPS12,PRKCA,RPTOR,HIF1A,PLD6,RPS6KA1,RPS4X,RHOU,PRKAB2
p70S6K Signaling	0		0.146	PLCB1,GNAI1,PPP2R5E,RPS6,F2RL1,AKT3,YWHAG,PLCB2,PLCB4,MRAS,PPP2R3A,PLD1,PIK3R1,AKT2,EEF2K,F2R,PRKCA,PLCG1,F2
tRNA Charging	0		0.0526	DARS,YARS2
γ-glutamyl Cycle	0		0.0625	GGACT,
Acetyl-CoA Biosynthesis I (Pyruvate Dehydrogenase Complex)	0.187		0.167	PDHB,
Adenine and Adenosine Salvage III	0.187		0.167	CECR1,
Urea Cycle	0.187		0.167	ARG2,
Zymosterol Biosynthesis	0.187		0.167	CYP51A1,
Androgen Biosynthesis	0.224		0.167	HSD3B7,SRD5A3
BER pathway	0.224		0.167	LIG3,APEX1
Hematopoiesis from Multipotent Stem Cells	0.224		0.167	EPO,CSF1
2-oxobutanoate Degradation I	0.234		0.2	PCCB,
CMP-N-acetylneuraminate Biosynthesis I (Eukaryotes)	0.234		0.2	NAGK,
Citrulline-Nitric Oxide Cycle	0.234		0.2	NOS3,
Creatine-phosphate Biosynthesis	0.234		0.2	MAP4K4,
Galactose Degradation I (Leloir Pathway)	0.234		0.2	GALE,
Lysine Degradation II	0.234		0.2	AADAT,
Lysine Degradation V	0.234		0.2	AADAT,
Myo-inositol Biosynthesis	0.234		0.2	INPP5F,
Pyruvate Fermentation to Lactate	0.234		0.2	LDHAL6B,
Rapoport-Luebering Glycolytic Shunt	0.234		0.2	TIGAR,
Serine Biosynthesis	0.234		0.2	PHGDH,
Tyrosine Degradation I	0.234		0.2	TAT,
dTMP De Novo Biosynthesis	0.234		0.2	DHFR,
Wnt/Ca+ pathway	0.256		0.161	PLCB1,PRKCA,CREB1,PLCB2,WNT5A,PLCB4,WNT5B,PLCG1,FZD3
Estrogen-mediated S-phase Entry	0.258		0.167	CDKN1B,E2F2,CDKN1A,ESR1
Glycogen Degradation II	0.262		0.182	PGM2,PGM3
Purine Nucleotides De Novo Biosynthesis II	0.262		0.182	GART,ATIC
PCP pathway	0.262		0.161	WNT8B,EFNB1,WNT2,WNT5A,WNT7B,WNT5B,WNT4,FZD3,WNT3A,WNT9A
Cancer Drug Resistance By Drug Efflux	0.268		0.163	PTEN,AKT3,MRAS,PIK3R1,FOXO1,AKT2,TP53,FOXO6
γ-linolenate Biosynthesis II (Animals)	0.276		0.176	ACSL4,SLC27A1,ACSL6
Mouse Embryonic Stem Cell Pluripotency	0.279		0.162	NANOG,MAP3K7,AKT3,TCF3,LEF1,MRAS,PIK3R1,AKT2,TP53,BMPR1A,BMPR2,BMP4,FOXD3,TAB1,FZD3,SOX2,WNT3A
p53 Signaling	0.283		0.162	PTEN,AKT3,CHEK2,MED1,ST13,PIK3R1,AKT2,TP53,PERP,TNFRSF10A,TRIM29,HIF1A,CDKN1A,TP73,FAS,GML,TIGAR,CHEK1
Autoimmune Thyroid Disease Signaling	0.283		0.167	HLA-A,CD28,HLA-DOA,FAS,CD40,CD86,TPO
Hematopoiesis from Pluripotent Stem Cells	0.283		0.167	EPO,IL11,IL12A,CD3G,CSF1,CD4,IL6
Agrin Interactions at Neuromuscular Junction	0.285		0.164	PAK2,ARHGEF6,CTTN,MRAS,PAK1,PXN,LAMC1,ITGB3,NRG2,PAK4,NRG4
Synaptic Long Term Potentiation	0.286		0.162	PLCB1,CREB1,CALM1 (includes others),PLCB2,PLCB4,MRAS,CHP1,PPP3CB,CAMK2D,PPP3CC,GRIA3,PRKCA,PPP1R3C,GRM4,CACNA1C,RAP1B,RPS6KA1,PLCG1,PRKAR2A
Tryptophan Degradation III (Eukaryotic)	0.286		0.174	GCDH,L3HYPDH,HAAO,KYNU
Allograft Rejection Signaling	0.289		0.167	HLA-DPB1,HLA-A,CD28,HLA-DOA,B2M,FAS,CD40,CD86
ERK/MAPK Signaling	0.289		0.162	PPP2R5E,PLA2G4E,CREB1,MRAS,MKNK2,PPP2R3A,PIK3R1,ELK1,ELF1,HIST1H3C,PPP1R3C,CRK,EIF4EBP1,ESR1,DUSP4,PRKAR2A,PAK2,MAPKAPK5,YWHAG,CRKL,PAK1,PXN,H3F3A/H3F3B,PLA2G4F,DUSP2,PRKCA,ELF4,LAMTOR3,RAP1B,RPS6KA1,PLCG1,PAK4
STAT3 Pathway	0.289		0.164	BMPR1A,BMPR2,PDGFRB,SOCS5,PDGFRA,MRAS,GHR,CDKN1A,INSR,TGFBR1,TNFRSF11A,IGF2R
Cdc42 Signaling	0.293		0.163	HLA-DPB1,PAK2,LIMK2,HLA-DOA,CD3G,MYL2,PAK1,EXOC8,LIMK1,B2M,ARPC5L,CFL2,EXOC6,ARPC5,LLGL1,HLA-A,ARHGEF6,ARPC4,MYLK,IQGAP2,PAK4
B Cell Development	0.294		0.172	HLA-A,HLA-DOA,IL7R,CD40,CD86
Dopamine Degradation	0.294		0.172	ALDH1A2,ALDH3B1,ALDH1L2,ALDH1B1,MAOA
Sonic Hedgehog Signaling	0.294		0.172	SUFU,PTCH1,HKR1,CCNB1,PRKAR2A
Arginine Degradation I (Arginase Pathway)	0.298		0.25	ARG2,
Glutathione Redox Reactions II	0.298		0.25	GLRX,
Heme Biosynthesis from Uroporphyrinogen-III I	0.298		0.25	FECH,
Melatonin Degradation II	0.298		0.25	MAOA,
Methylmalonyl Pathway	0.298		0.25	PCCB,
Molybdenum Cofactor Biosynthesis	0.298		0.25	NFS1,
N-acetylglucosamine Degradation II	0.298		0.25	NAGK,
Phenylethylamine Degradation I	0.298		0.25	AOC3,
Proline Biosynthesis I	0.298		0.25	PYCRL,
Spermine and Spermidine Degradation I	0.298		0.25	PAOX,
Thymine Degradation	0.298		0.25	DPYSL2,
Trans, trans-farnesyl Diphosphate Biosynthesis	0.298		0.25	IDI2,
Uracil Degradation II (Reductive)	0.298		0.25	DPYSL2,
Rac Signaling	0.3		0.164	PAK2,LIMK2,MRAS,PAK1,LIMK1,ARPC5L,PLD1,PIK3R1,ELK4,CFL2,ELK1,ARPC5,CDK5R1,CYFIP1,ARPC4,IQGAP2,PIP5K1C,PAK4,PIP5K1B
Noradrenaline and Adrenaline Degradation	0.3		0.171	ALDH1A2,ALDH3B1,ALDH1L2,ADH6,ALDH1B1,MAOA
Phospholipase C Signaling	0.304		0.162	ARHGEF15,PLA2G4E,CREB1,CALM1 (includes others),PLCB2,MRAS,GNG7,CHP1,PLD1,PPP3CC,RALB,ARHGEF6,GNG4,ADCY2,MEF2B,HDAC11,ARHGEF18,PLCB1,HDAC5,ARHGEF10,RACK1,CD3G,PLCB4,MYL2,PPP3CB,PLA2G4F,BORCS8-MEF2B,MEF2C,PRKCA,ARHGEF2,PLD6,RAP1B,PLCG1,GNG2,ARHGEF9,RHOU,MEF2A,ADCY9
Calcium Transport I	0.306		0.2	ATP2B2,ANXA5
Ketogenesis	0.306		0.2	BDH1,BDH2
Oleate Biosynthesis II (Animals)	0.306		0.2	SCD5,UFSP2
Chronic Myeloid Leukemia Signaling	0.308		0.165	HDAC5,AKT3,CRKL,MRAS,IKBKB,PIK3R1,AKT2,TP53,GAB2,CDKN1B,SMAD3,E2F2,CDKN1A,SIN3A,CRK,TGFBR1,HDAC11
Methionine Degradation I (to Homocysteine)	0.313		0.188	MGMT,MAT2B,AHCY
Leptin Signaling in Obesity	0.314		0.167	PLCB1,AKT3,PLCB2,PLCB4,PIK3R1,AKT2,PLCG1,ADCY2,LEP,POMC,FOXO1,ADCY9,NPY,PRKAR2A
PEDF Signaling	0.314		0.167	AKT3,MRAS,IKBKB,PIK3R1,NFKBIA,AKT2,ARHGAP22,TP53,ELK1,GDNF,PNPLA2,FAS,BDNF,HNF1B
PDGF Signaling	0.318		0.167	PDGFRB,PDGFD,INPP5F,CRKL,PDGFRA,MRAS,PIK3R1,ELK1,INPP5B,OCRL,PRKCA,SPHK2,SYNJ2,PLCG1,CRK
PKCθ Signaling in T Lymphocytes	0.32		0.165	POU2F1,MAP3K7,HLA-DOA,CD3G,MRAS,CHP1,PPP3CB,CAMK2D,IKBKB,PIK3R1,NFKBIA,PPP3CC,MALT1,HLA-A,CD28,BCL10,MAP3K2,PLCG1,CD4,CD86,VAV3
CXCR4 Signaling	0.322		0.165	GNAI1,CXCL12,AKT3,PLCB2,GNAO1,MRAS,GNG7,PIK3R1,ELK1,GNG4,ADCY2,CD4,CRK,PLCB1,PAK2,RACK1,PLCB4,MYL2,PAK1,PXN,AKT2,PRKCA,GNG2,PAK4,GNAT1,RHOU,ADCY9
TNFR2 Signaling	0.323		0.179	TANK,NAIP,LTA,IKBKB,NFKBIA
Dendritic Cell Maturation	0.329		0.165	CCR7,AKT3,IL12A,CREB1,PLCB2,TNFRSF1A,IL36B,COL1A1,PIK3R1,CD40,IL6,NFKBIA,IL1RL2,TLR2,CD86,PLCB1,HLA-DOA,CD58,PLCB4,LTA,IKBKB,B2M,LY75,AKT2,HLA-A,TLR3,PLCG1,TAB1,LEP,DDR2
Triacylglycerol Degradation	0.331		0.175	DDHD2,CES3,PNLIPRP1,NDST3,PNPLA2,NDST4,FAAH
IL-3 Signaling	0.332		0.169	AKT3,CRKL,CSF2RB,MRAS,PAK1,CHP1,PPP3CB,PIK3R1,PPP3CC,AKT2,ELK1,GAB2,PRKCA,FOXO1
Factors Promoting Cardiogenesis in Vertebrates	0.335		0.169	MAP3K7,TCF3,LEF1,MYL2,TDGF1,MEF2C,ACVR1B,BMP8A,BMPR1A,BMPR2,PRKCA,BMP4,BMP1,TGFBR1,FZD3
Thrombin Signaling	0.336		0.165	GNAI1,ARHGEF15,AKT3,CREB1,PLCB2,GNAO1,MRAS,GNG7,CAMK2D,PIK3R1,ELK1,GATA3,F2R,ARHGEF6,GNG4,ADCY2,F2,PLCB1,ARHGEF10,RACK1,PLCB4,MYL2,IKBKB,AKT2,PRKCA,ARHGEF2,MYLK,PLCG1,GNG2,GNAT1,ARHGEF9,RHOU,ADCY9
Regulation of the Epithelial-Mesenchymal Transition Pathway	0.344		0.166	FGF5,PDGFD,AKT3,WNT5A,MRAS,FGF19,ZEB2,PIK3R1,NOTCH2,SNAI1,WNT8B,WNT2,SMAD3,PARD6B,MET,TGFBR1,FZD3,SMURF1,WNT3A,PSEN1,PDGFRB,FGF12,TCF3,LEF1,WNT7B,WNT5B,AKT2,HIF1A,TWIST2,WNT4,WNT9A
HIF1α Signaling	0.345		0.168	AKT3,MRAS,EGLN3,SLC2A2,MMP17,PIK3R1,SLC2A1,AKT2,TP53,VHL,EPO,SLC2A4,HIF1A,MMP20,ARNT,NOS3,APEX1,VEGFC,MMP24
Communication between Innate and Adaptive Immune Cells	0.35		0.171	CCR7,IL12A,IL36B,B2M,CD40,IL6,HLA-A,CD28,TLR3,TNFRSF13C,CD4,TLR6,TLR2,CD86
Ovarian Cancer Signaling	0.356		0.168	PTEN,AKT3,TCF3,WNT5A,LEF1,MRAS,WNT7B,WNT5B,PIK3R1,AKT2,TP53,ARRB1,WNT8B,FSHB,WNT2,SIN3A,WNT4,FZD3,LHCGR,VEGFC,MSH2,WNT3A,PRKAR2A,WNT9A
Glucose and Glucose-1-phosphate Degradation	0.36		0.222	PGM2,PGM3
ERK5 Signaling	0.364		0.175	YWHAG,CREB1,MAP3K2,MRAS,RPS6KA1,MEF2B,BORCS8-MEF2B,ELK4,MEF2C,FOSL1,MEF2A
PXR/RXR Activation	0.364		0.175	CES3,AKT3,CPT1A,RXRA,INSR,CYP3A4,CYP2C19,IL6,FOXO1,AKT2,PRKAR2A
T Helper Cell Differentiation	0.366		0.174	GATA3,HLA-A,IL12A,CD28,HLA-DOA,TNFRSF1A,ICOSLG/LOC102723996,TGFBR1,CD40,IL6,CD86,IL12RB1
Gα12/13 Signaling	0.367		0.169	CDH13,LPAR6,LPAR1,F2RL1,AKT3,MRAS,MYL2,CDH7,PXN,IKBKB,BORCS8-MEF2B,PIK3R1,NFKBIA,AKT2,MEF2C,ELK1,CDH18,F2R,MEF2B,MEF2A,F2,VAV3
Actin Cytoskeleton Signaling	0.367		0.167	FGF5,PDGFD,MRAS,LIMK1,FGF19,ARPC5L,PIK3R1,MYLK3,ARPC5,F2R,FN1,ARHGEF6,CYFIP1,SSH3,ARPC4,MYH11,CRK,IQGAP2,PIP5K1C,TIAM2,ACTN4,F2,VAV3,FGF12,PAK2,LIMK2,CRKL,MYL2,PAK1,ARHGAP35,PXN,CFL2,SSH1,NCKAP1L,MYLK,PAK4,PIP5K1B
Signaling by Rho Family GTPases	0.374		0.167	GNAI1,ARHGEF15,GNAO1,MRAS,LIMK1,GNG7,ARPC5L,SEPT12,PLD1,PIK3R1,ELK1,ARPC5,ARHGEF6,CYFIP1,ARPC4,GNG4,PIP5K1C,ARHGEF18,CDH13,PAK2,LIMK2,ARHGEF10,CDC42EP4,RACK1,MYL2,PAK1,CDH7,SEPT6,SEPT2,CFL2,CDH18,NEDD4,ARHGEF2,CIT,MYLK,GNG2,PAK4,GNAT1,ARHGEF9,PIP5K1B,RHOU
Primary Immunodeficiency Signaling	0.386		0.182	TAP2,IL7R,AICDA,TNFRSF13C,CD4,CD40,RFX5,CIITA
IL-10 Signaling	0.388		0.176	MAP3K7,MAP4K4,IL1R1,CCR1,ARG2,IL1RL2,IL36B,IKBKB,TAB1,IL6,NFKBIA,ELK1
BMP signaling pathway	0.389		0.176	MAP3K7,CREB1,MRAS,GREM1,BMP8A,BMPR1A,BMPR2,BMP4,BMP1,ZNF423,TAB1,SMURF1,PRKAR2A
5-aminoimidazole Ribonucleotide Biosynthesis I	0.389		0.333	GART,
Ascorbate Recycling (Cytosolic)	0.389		0.333	GLRX,
Diphthamide Biosynthesis	0.389		0.333	DPH5,
Glycerol-3-phosphate Shuttle	0.389		0.333	GPD1L,
Inosine-5'-phosphate Biosynthesis II	0.389		0.333	ATIC,
L-carnitine Biosynthesis	0.389		0.333	TMLHE,
Methionine Salvage II (Mammalian)	0.389		0.333	MTR,
Oxidized GTP and dGTP Detoxification	0.389		0.333	NUDT1,
PRPP Biosynthesis I	0.389		0.333	PRPS1,
S-adenosyl-L-methionine Biosynthesis	0.389		0.333	MAT2B,
Tetrahydrobiopterin Biosynthesis I	0.389		0.333	GCH1,
Tetrahydrobiopterin Biosynthesis II	0.389		0.333	GCH1,
Thyroid Hormone Biosynthesis	0.389		0.333	TPO,
Antiproliferative Role of TOB in T Cell Signaling	0.39		0.192	CDKN1B,SMAD3,PABPC1,RPS6KA1,TGFBR1
Aldosterone Signaling in Epithelial Cells	0.391		0.17	HSPA2,PLCB2,DNAJC17,HSPA12A,DNAJC16,HSPA13,DNAJC5,DNAJC2,PIK3R1,SLC12A2,PIP5K1C,AHCY,PLCB1,DNAJC30,DNAJB1,PLCB4,HSP90B1,DNAJC14,DNAJC3,NEDD4,PRKCA,DNAJC28,DNAJC18,HSPA5,SCNN1B,PLCG1,ICMT,PIP5K1B
Prostate Cancer Signaling	0.392		0.174	PTEN,AKT3,CREB1,LEF1,MRAS,HSP90B1,KLK3,PIK3R1,NFKBIA,AKT2,TP53,AR,CDKN1B,CDKN1A,SIN3A,FOXO1
DNA Methylation and Transcriptional Repression Signaling	0.394		0.2	MECP2,SIN3A,SAP130,RBBP4
Colanic Acid Building Blocks Biosynthesis	0.403		0.214	MPI,GALE,GMPPB
DNA Double-Strand Break Repair by Homologous Recombination	0.403		0.214	RAD50,RPA1,MRE11
DNA Double-Strand Break Repair by Non-Homologous End Joining	0.403		0.214	LIG3,RAD50,MRE11
Dermatan Sulfate Degradation (Metazoa)	0.403		0.214	GM2A,CEMIP,HEXA
Superpathway of Citrulline Metabolism	0.403		0.214	ARG2,NOS3,GLS
Urate Biosynthesis/Inosine 5'-phosphate Degradation	0.403		0.214	NT5C1B,AOX1,NT5E
nNOS Signaling in Skeletal Muscle Cells	0.403		0.214	CALM1 (includes others),SNTB2,RYR2
Toll-like Receptor Signaling	0.41		0.178	MAP3K7,MAP4K4,IL12A,TIRAP,IL36B,IKBKB,NFKBIA,ELK1,TLR3,TAB1,TLR6,TRAF4,TLR2
CCR5 Signaling in Macrophages	0.41		0.179	GNAI1,PRKCA,CALM1 (includes others),RACK1,CD3G,MRAS,GNG4,GNG7,PLCG1,CD4,GNG2,FAS
Renal Cell Carcinoma Signaling	0.41		0.177	PAK2,AKT3,MRAS,PAK1,EGLN3,PIK3R1,SLC2A1,AKT2,VHL,HIF1A,MET,ARNT,CRK,PAK4
α-Adrenergic Signaling	0.411		0.176	GNAI1,PHKA2,CALM1 (includes others),RACK1,MRAS,GNG7,PRKCA,GYS1,GNG4,PLCG1,ADCY2,GNG2,ADRA1A,ADCY9,PRKAR2A
IL-1 Signaling	0.411		0.176	GNAI1,MAP3K7,GNAO1,RACK1,MRAS,GNG7,IKBKB,NFKBIA,IL1R1,GNG4,ADCY2,TAB1,GNG2,GNAT1,ADCY9,PRKAR2A
Integrin Signaling	0.415		0.17	PTEN,AKT3,MRAS,ARPC5L,CAPN8,PIK3R1,MYLK3,RALB,ARPC5,ARPC4,TSPAN5,BCAR3,ITGB3,CRK,ACTN4,CAPNS1,CAPN7,TSPAN6,PAK2,CTTN,CRKL,MYL2,PAK1,PXN,ITGA11,ITGA9,PARVB,AKT2,CAPN5,NCK2,CAPN6,MYLK,RAP1B,PLCG1,PAK4,RHOU
Hereditary Breast Cancer Signaling	0.417		0.173	HDAC5,RFC3,PTEN,AKT3,CHEK2,RAD50,PBRM1,FANCC,MRAS,POLR2F,MRE11,PIK3R1,FANCM,AKT2,TP53,ARID2,CDKN1A,RFC2,RPA1,HDAC11,POLR2J2/POLR2J3,CCNB1,MSH2,CHEK1
Superpathway of Methionine Degradation	0.421		0.194	MGMT,MTR,MAT2B,PCCB,CTH,AHCY
Citrulline Biosynthesis	0.425		0.25	ARG2,GLS
GDP-glucose Biosynthesis	0.425		0.25	PGM2,PGM3
Phosphatidylethanolamine Biosynthesis II	0.425		0.25	CHKA,ETNK2
Superoxide Radicals Degradation	0.425		0.25	SOD3,TYRP1
GPCR-Mediated Nutrient Sensing in Enteroendocrine Cells	0.432		0.179	PLCB1,GNAI1,PLCB2,PLCB4,GNG7,CASR,FFAR3,PRKCA,GNG4,PLCG1,ADCY2,GNG2,FFAR4,ADCY9,PRKAR2A
fMLP Signaling in Neutrophils	0.432		0.175	PLCB1,GNAI1,CALM1 (includes others),PLCB2,RACK1,PLCB4,MRAS,NCF1,GNG7,CHP1,PPP3CB,ARPC5L,PIK3R1,NFKBIA,PPP3CC,ELK1,ARPC5,PRKCA,ARPC4,GNG4,GNG2
CCR3 Signaling in Eosinophils	0.433		0.175	PLCB1,GNAI1,PLA2G4E,PAK2,LIMK2,CALM1 (includes others),PLCB2,RACK1,PLCB4,MRAS,PAK1,LIMK1,GNG7,PLA2G4F,CCL11,PIK3R1,CFL2,PRKCA,GNG4,MYLK,GNG2,PAK4
CD28 Signaling in T Helper Cells	0.433		0.175	AKT3,CALM1 (includes others),HLA-DOA,CD3G,PAK1,CHP1,PPP3CB,IKBKB,ARPC5L,PIK3R1,NFKBIA,PPP3CC,AKT2,MALT1,ARPC5,HLA-A,CD28,BCL10,ARPC4,PLCG1,CD4,CD86
Role of Wnt/GSK-3β Signaling in the Pathogenesis of Influenza	0.433		0.181	CSNK1A1,TCF3,WNT5A,LEF1,WNT7B,WNT5B,WNT8B,WNT2,WNT4,FZD3,CSNK1G1,WNT3A,WNT9A
Calcium-induced T Lymphocyte Apoptosis	0.436		0.183	HLA-A,CABIN1,PRKCA,CALM1 (includes others),HLA-DOA,CD3G,CHP1,PPP3CB,PLCG1,CD4,PPP3CC
Purine Nucleotides Degradation II (Aerobic)	0.438		0.211	NT5C1B,AOX1,NT5E,CECR1
The Visual Cycle	0.438		0.211	RBP2,RDH13,RDH10,RBP5
Serotonin Receptor Signaling	0.445		0.19	GCH1,ADCY2,QDPR,ADCY9,HTR2A,PCBD1,MAOA,HTR4
Crosstalk between Dendritic Cells and Natural Killer Cells	0.453		0.18	CCR7,MICA,IL12A,CD226,CSF2RB,LTA,NECTIN2,CAMK2D,CD40,IL6,CD69,HLA-A,CD28,TLR3,FAS,CD86
VDR/RXR Activation	0.455		0.182	GTF2B,IL12A,MED1,CASR,THBD,PRKCA,CDKN1B,CDKN1A,YY1,RXRA,VDR,NCOR1,FOXO1,IGFBP6
Cholesterol Biosynthesis I	0.458		0.231	DHCR24,CYP51A1,SC5D
Cholesterol Biosynthesis II (via 24,25-dihydrolanosterol)	0.458		0.231	DHCR24,CYP51A1,SC5D
Cholesterol Biosynthesis III (via Desmosterol)	0.458		0.231	DHCR24,CYP51A1,SC5D
Chondroitin Sulfate Degradation (Metazoa)	0.458		0.231	GM2A,CEMIP,HEXA
Fatty Acid Activation	0.458		0.231	ACSL4,SLC27A1,ACSL6
Guanosine Nucleotides Degradation III	0.458		0.231	NT5C1B,AOX1,NT5E
Phospholipases	0.462		0.186	PLCB1,PLA2G4E,PLCB2,PLA2G16,PLCB4,PLD6,PLA2G4F,PLCG1,PNPLA8,PLD1,PLA2R1
Tight Junction Signaling	0.468		0.175	CLDN10,PPP2R5E,PTEN,AKT3,SNAP25,TNFRSF1A,STX16,PPP2R3A,MAGI2,PATJ,LLGL1,VTI1A,EPB41,VAMP3,MYH11,TGFBR1,SMURF1,PRKAR2A,JAM2,NECTIN1,MYL2,CLDN18,NECTIN2,CPSF6,AKT2,ARHGEF2,MYLK,CRB3,JAM3
PAK Signaling	0.472		0.18	PDGFRB,PAK2,PDGFD,LIMK2,PDGFRA,MRAS,MYL2,PAK1,LIMK1,EPHA3,PXN,PIK3R1,CFL2,DSCAM,ARHGEF6,NCK2,MYLK,PAK4
VEGF Signaling	0.472		0.18	AKT3,MRAS,PXN,EIF2B3,PIK3R1,EIF1,AKT2,EIF1AY,PRKCA,HIF1A,EIF2B1,PLCG1,ARNT,NOS3,EIF2B2,ACTN4,FOXO1,VEGFC
Angiopoietin Signaling	0.479		0.184	ANGPT4,PAK2,AKT3,MRAS,PAK1,IKBKB,PIK3R1,NFKBIA,AKT2,ANGPTL1,CRK,NOS3,PAK4,FOXO1
Aryl Hydrocarbon Receptor Signaling	0.487		0.178	ALDH3B2,AHRR,CHEK2,MCM7,MED1,HSP90B1,NQO2,IL6,TP53,NFIC,ALDH1A2,DHFR,CDKN1B,ALDH3B1,ALDH1L2,CDKN1A,TP73,RXRA,GSTM4,ARNT,ALDH1B1,FAS,ESR1,CHEK1
Cysteine Biosynthesis III (mammalia)	0.488		0.222	MGMT,MAT2B,CTH,AHCY
iCOS-iCOSL Signaling in T Helper Cells	0.489		0.179	PTEN,AKT3,CALM1 (includes others),HLA-DOA,CD3G,ICOSLG/LOC102723996,CHP1,PPP3CB,CAMK2D,IKBKB,PIK3R1,CD40,NFKBIA,PPP3CC,AKT2,HLA-A,CD28,GAB2,PLEKHA1,PLCG1,CD4
TGF-β Signaling	0.498		0.184	MAP3K7,MRAS,ACVR1B,BMPR1A,BMPR2,BMP4,SMAD3,TGIF1,RUNX3,ZNF423,VDR,TAB1,PMEPA1,SERPINE1,TGFBR1,SMURF1
CREB Signaling in Neurons	0.501		0.176	GNAI1,GTF2B,AKT3,CREB1,CALM1 (includes others),PLCB2,GNAO1,MRAS,GNG7,GRID1,POLR2F,CAMK2D,PIK3R1,ELK1,GRIA3,GRM4,GNG4,ADCY2,POLR2J2/POLR2J3,GRIK3,PRKAR2A,PLCB1,RACK1,PLCB4,AKT2,PRKCA,GRID2,RPS6KA1,PLCG1,GNG2,GNAT1,ADCY9
Gαq Signaling	0.502		0.177	AKT3,CALM1 (includes others),PLCB2,MRAS,GNG7,CHP1,PLD1,PIK3R1,NFKBIA,PPP3CC,ELK1,GNG4,ADRA1A,HTR2A,PLCB1,RGS18,RACK1,PLCB4,PPP3CB,IKBKB,AKT2,PRKCA,GYS1,PLD6,PLCG1,GNG2,RGS4,RHOU
Ceramide Biosynthesis	0.504		0.286	SPTSSA,SPTLC2
Ketolysis	0.504		0.286	BDH1,BDH2
Synaptic Long Term Depression	0.504		0.179	GNAI1,PPP2R5E,PLA2G4E,NPR1,PLCB2,GNAO1,PLA2G16,MRAS,GRID1,PPP2R3A,GRIA3,GRM4,PPP1R17,PNPLA8,NOS3,PLCB1,PLCB4,PRKG1,PLA2G4F,PRKCA,GRID2,PLCG1,GNAT1,RYR2,PLA2R1
Tryptophan Degradation to 2-amino-3-carboxymuconate Semialdehyde	0.504		0.286	HAAO,KYNU
Transcriptional Regulatory Network in Embryonic Stem Cells	0.512		0.2	NANOG,GJD2,CDX2,CDYL,FOXD3,SOX2,SKIL,HAND1
Pyrimidine Deoxyribonucleotides De Novo Biosynthesis I	0.515		0.217	RRM2,RRM1,NME3,AK9,AK5
FAK Signaling	0.516		0.184	PAK2,PTEN,AKT3,TNS1,MRAS,PAK1,PXN,CAPN8,PIK3R1,AKT2,ARHGEF6,CAPN5,CAPN6,PLCG1,CRK,PAK4,CAPNS1,CAPN7
4-hydroxyproline Degradation I	0.53		0.5	HOGA1,
All-trans-decaprenyl Diphosphate Biosynthesis	0.53		0.5	PDSS1,
Anandamide Degradation	0.53		0.5	FAAH,
Cardiolipin Biosynthesis II	0.53		0.5	PTPMT1,
Choline Degradation I	0.53		0.5	CHDH,
Cysteine Biosynthesis/Homocysteine Degradation	0.53		0.5	CTH,
Dolichol and Dolichyl Phosphate Biosynthesis	0.53		0.5	DHDDS,
Formaldehyde Oxidation II (Glutathione-dependent)	0.53		0.5	ESD,
Glutamine Degradation I	0.53		0.5	GLS,
Glycine Biosynthesis III	0.53		0.5	AGXT,
Spermine Biosynthesis	0.53		0.5	SMS,
Role of Macrophages, Fibroblasts and Endothelial Cells in Rheumatoid Arthritis	0.531		0.173	PLCB2,TNFRSF1A,MRAS,CHP1,NFKBIA,C5AR1,IL1RL2,TLR2,VEGFC,LEF1,PLCB4,IKBKB,TRADD,IL17RA,SFRP4,DKK4,CXCL12,CSNK1A1,PDGFD,F2RL1,AKT3,CREB1,CALM1 (includes others),WNT5A,GNAO1,CAMK2D,IL36B,PIK3R1,IL6,PPP3CC,WNT8B,FN1,IL1R1,WNT2,FZD3,TLR6,TRAF4,WNT3A,PLCB1,MAP3K7,TCF3,WNT7B,LTA,WNT5B,PPP3CB,AKT2,PRKCA,TLR3,CSF1,PLCG1,WNT4,WNT9A
Intrinsic Prothrombin Activation Pathway	0.541		0.214	THBD,KLK3,F8,COL1A1,F5,F2
Mitochondrial L-carnitine Shuttle Pathway	0.543		0.235	ACSL4,SLC27A1,CPT1A,ACSL6
Oxidative Ethanol Degradation III	0.543		0.235	ALDH1A2,ALDH3B1,ALDH1L2,ALDH1B1
Netrin Signaling	0.549		0.205	NTN1,NCK2,PRKG1,CHP1,PPP3CB,PPP3CC,RYR2,PRKAR2A
Gαi Signaling	0.549		0.183	GNAI1,LPAR1,APLNR,RACK1,MRAS,S1PR3,GNG7,ADRA2B,CNR2,FFAR3,RALB,LTB4R,GRM4,GNG4,ADCY2,GNG2,CCR4,RGS4,RXFP4,ADCY9,XCR1,PRKAR2A
Glutamate Receptor Signaling	0.551		0.196	HOMER1,GRIA3,CALM1 (includes others),GRM4,GNG7,HOMER2,GRID2,GRID1,GNG2,GRIK3,GLS
Gαs Signaling	0.555		0.185	HCK,ADORA2A,CREB1,CNGB1,RACK1,MRAS,ADRB1,GNG7,MC1R,ELK1,ADORA2B,GNG4,ADCY2,GNG2,LHCGR,RYR2,ADCY9,HRH2,HTR4,PRKAR2A
D-myo-inositol (1,4,5,6)-Tetrakisphosphate Biosynthesis	0.563		0.182	NUDT1,PPP2R5E,PTEN,DOT1L,PTPN22,PPP2R3A,MTMR2,DUSP28,PTPRH,INPP5B,OCRL,TNS3,SSH3,PTPRF,SIRPA,G6PC2,PALD1,INPP5F,DUSP27,PDCD1,DUSP2,PTPN1,CILP,PPM1K,PPFIA4
D-myo-inositol (3,4,5,6)-tetrakisphosphate Biosynthesis	0.563		0.182	NUDT1,PPP2R5E,PTEN,DOT1L,PTPN22,PPP2R3A,MTMR2,DUSP28,PTPRH,INPP5B,OCRL,TNS3,SSH3,PTPRF,SIRPA,G6PC2,PALD1,INPP5F,DUSP27,PDCD1,DUSP2,PTPN1,CILP,PPM1K,PPFIA4
Sumoylation Pathway	0.563		0.188	GDI1,RFC3,SENP5,SP100,MYB,NFKBIA,TP53,AR,KDM1A,UBE2I,RFC2,SP3,RPA1,FAS,TDG,RHOU,ZNF217,RCOR1
Clathrin-mediated Endocytosis Signaling	0.566		0.179	FGF5,PDGFD,FGF19,CHP1,ARPC5L,PIK3R1,APOC3,PPP3CC,ARRB1,ARPC5,RAB5C,F2R,LDLR,ARPC4,MET,ITGB3,PIP5K1C,VEGFC,APOL1,F2,FGF12,CTTN,SNX9,CLTC,PPP3CB,EPHB2,LYZ,STON2,APOB,RAB5B,PICALM,SH3GLB1,MYO1E,APOA1,AP2M1
Role of Tissue Factor in Cancer	0.571		0.185	PLCB1,FGF5,HCK,PTEN,F2RL1,AKT3,LIMK2,MRAS,PAK1,LIMK1,PIK3R1,AKT2,TP53,CFL2,ARRB1,PRKCA,CSF1,RPS6KA1,F3,ITGB3,VEGFC,F2
eNOS Signaling	0.578		0.182	HSPA2,LPAR6,LPAR1,AKT3,CALM1 (includes others),CNGB1,CHRNA10,PIK3R1,ADCY2,NOS3,VEGFC,ESR1,PRKAR2A,CHRNA5,AQP9,SLC7A1,HSP90B1,PRKG1,BDKRB2,AKT2,CHRNB4,PRKCA,HSPA5,PLCG1,CHRNA4,ADCY9,PRKAB2
Regulation of Cellular Mechanics by Calpain Protease	0.583		0.2	CAPN5,CNGB1,CDKN1B,MRAS,CAPN6,PXN,CAST,CAPN8,ACTN4,CAPNS1,CAPN7
Antigen Presentation Pathway	0.588		0.211	HLA-DPB1,HLA-A,TAP2,HLA-DOA,NLRC5,CANX,B2M,CIITA
Cell Cycle Control of Chromosomal Replication	0.588		0.211	DNA2,TOP2A,CHEK2,MCM7,POLA2,MCM2,RPA1,PRIM1
Atherosclerosis Signaling	0.59		0.185	CXCL12,PLA2G4E,PDGFD,PLA2G16,TNFSF14,IL36B,PLA2G4F,COL1A1,CCL11,CD40,IL6,APOC3,LYZ,GLG1,APOB,CSF1,SELPLG,APOA1,F3,PNPLA8,APOL1,PLA2R1,ALOX15
GABA Receptor Signaling	0.595		0.197	GABRR2,GABRG2,MRAS,GABARAP,SLC6A13,GABRG1,KCNQ2,GABRG3,ADCY2,AP2M1,SLC6A1,KCNQ3,ADCY9
UDP-N-acetyl-D-galactosamine Biosynthesis II	0.596		0.273	GALE,UAP1,PGM3
Altered T Cell and B Cell Signaling in Rheumatoid Arthritis	0.6		0.193	SLAMF1,IL12A,HLA-DOA,LTA,IL36B,CD40,IL6,HLA-A,CD28,TLR3,CSF1,TNFRSF13C,TLR6,FAS,TLR2,CD86
Arginine Degradation VI (Arginase 2 Pathway)	0.605		0.333	ARG2,PYCRL
Chondroitin and Dermatan Biosynthesis	0.605		0.333	CHSY3,CSGALNACT1
GDP-mannose Biosynthesis	0.605		0.333	MPI,GMPPB
Glycine Cleavage Complex	0.605		0.333	GCSH,OCA2
NAD Biosynthesis from 2-amino-3-carboxymuconate Semialdehyde	0.605		0.333	NMNAT2,NMNAT1
Proline Biosynthesis II (from Arginine)	0.605		0.333	PADI4,PYCRL
Purine Ribonucleosides Degradation to Ribose-1-phosphate	0.605		0.333	PGM2,CECR1
Adenosine Nucleotides Degradation II	0.606		0.25	NT5C1B,AOX1,NT5E,CECR1
Extrinsic Prothrombin Activation Pathway	0.606		0.25	THBD,F3,F5,F2
Endoplasmic Reticulum Stress Pathway	0.621		0.238	DNAJC3,MBTPS2,HSP90B1,HSPA5,XBP1
Ethanol Degradation IV	0.621		0.238	ALDH1A2,ALDH3B1,ALDH1L2,TYRP1,ALDH1B1
NAD Salvage Pathway II	0.621		0.238	ACP2,NMNAT2,NMNAT1,NT5C1B,NT5E
Heparan Sulfate Biosynthesis	0.627		0.2	HS3ST3B1,CHST3,HS6ST3,NDST3,EXT1,UST,EXTL3,B4GALT7,CES3,CHST7,NDST4,HS3ST1,CHST1
Unfolded protein response	0.653		0.208	HSPA2,DNAJC3,OS9,MBTPS2,SREBF1,HSP90B1,HSPA5,AMFR,XBP1,PPP1R15A,CANX
Huntington's Disease Signaling	0.656		0.181	HSPA2,AKT3,CREB1,PLCB2,SNAP25,DNAJC5,GNG7,POLR2F,CACNA1B,STX16,PSMF1,CAPN8,PIK3R1,TP53,VTI1A,VAMP3,HAP1,GNG4,SIN3A,NCOR1,HDAC11,POLR2J2/POLR2J3,CASP2,BDNF,CAPNS1,CAPN7,RCOR1,PLCB1,HDAC5,DNAJB1,RACK1,PLCB4,CLTC,AKT2,CPLX2,CDK5R1,PRKCA,CAPN5,CAPN6,HSPA5,CASP5,GNG2,GLS
LPS/IL-1 Mediated Inhibition of RXR Function	0.667		0.183	FABP3,TNFRSF1A,CPT1A,IL36B,CYP3A4,CYP2C19,NR5A2,FMO2,ACSL6,MGMT,ALDH1A2,IL1R1,ALDH3B1,ALDH1L2,IL1RL2,RXRA,ALDH1B1,CHST1,FMO3,MAOA,SLC27A1,HS3ST3B1,MAP3K7,CHST3,HS6ST3,ALDH3B2,NDST3,SREBF1,FABP4,ABCG1,UST,ACSL4,SOD3,FABP1,CHST7,GSTM4,NDST4,HS3ST1
TNFR1 Signaling	0.671		0.213	TANK,NAIP,PAK2,TNFRSF1A,PAK1,IKBKB,PAK4,TRADD,CASP2,NFKBIA
Heparan Sulfate Biosynthesis (Late Stages)	0.674		0.207	HS3ST3B1,CES3,CHST3,HS6ST3,NDST3,EXT1,CHST7,NDST4,HS3ST1,CHST1,UST,EXTL3
Retinol Biosynthesis	0.676		0.222	DDHD2,PNLIPRP1,PNPLA2,RBP2,RDH13,RDH10,RBP5,ESD
Tryptophan Degradation X (Mammalian, via Tryptamine)	0.682		0.25	ALDH1A2,ALDH3B1,ALDH1L2,ALDH1B1,MAOA
Assembly of RNA Polymerase I Complex	0.682		0.3	POLR1B,TAF1B,POLR1D
Embryonic Stem Cell Differentiation into Cardiac Lineages	0.682		0.3	NANOG,MESP1,SOX2
Role of NANOG in Mammalian Embryonic Stem Cell Pluripotency	0.684		0.192	NANOG,AKT3,WNT5A,MRAS,WNT7B,WNT5B,PIK3R1,AKT2,TP53,BMP8A,BMPR1A,WNT8B,BMPR2,CDX2,WNT2,BMP4,BMP1,FOXD3,WNT4,FZD3,SOX2,WNT3A,WNT9A
Epithelial Adherens Junction Signaling	0.685		0.189	PTEN,AKT3,EPN2,SSX2IP,MRAS,ARPC5L,MAGI2,NOTCH2,SNAI1,ARPC5,ARPC4,MYH11,MET,CRK,TGFBR1,ACTN4,TCF3,NECTIN1,LEF1,MYL2,NECTIN2,FER,AKT2,ACVR1B,BMPR2,MYO7A,RAP1B
Protein Ubiquitination Pathway	0.685		0.181	HSPA2,UBE2J1,USP54,DNAJC17,HSPA12A,DNAJC16,HSPA13,DNAJC5,DNAJC2,USP5,ANAPC1,PSMD11,PSMC4,UBE2E2,USP46,UBE2V2,USP24,SMURF1,DNAJC30,USP22,UBE2H,DNAJB1,HSP90B1,UBR1,AMFR,BAG1,B2M,DNAJC14,UBE2G1,USP40,UBE3A,VHL,PSMD12,DNAJC3,NEDD4,HLA-A,TAP2,DNAJC28,DNAJC18,UBE4A,UBE2I,HSPA5,PSMD13,PSMD8,USP33,USP47
Nitric Oxide Signaling in the Cardiovascular System	0.698		0.194	CACNA1E,AKT3,CALM1 (includes others),SLC7A1,HSP90B1,ADRB1,PRKG1,PDE1B,BDKRB2,PDE2A,PIK3R1,AKT2,PRKCA,ARG2,CACNA1C,PDE1C,NOS3,VEGFC,CACNA1D,RYR2,PRKAR2A
NF-κB Signaling	0.702		0.186	AKT3,TNFRSF1A,MRAS,TIRAP,IL36B,PIK3R1,CD40,NFKBIA,MALT1,IL1R1,BCL10,BMP4,GHR,TGFBR1,TLR6,TNFRSF11A,TLR2,TANK,MAP3K7,PDGFRB,MAP4K4,TAB3,PDGFRA,LTA,INSR,IKBKB,TRADD,AKT2,IGF2R,BMPR1A,BMPR2,TLR3,TAB1
nNOS Signaling in Neurons	0.713		0.217	PRKCA,CAPN5,CALM1 (includes others),CAPN6,CHP1,PPP3CB,CAPN8,PPP3CC,CAPNS1,CAPN7
Chemokine Signaling	0.714		0.206	PLCB1,GNAI1,CXCL12,LIMK2,CALM1 (includes others),PLCB2,PLCB4,MRAS,MYL2,LIMK1,CAMK2D,CCL11,PRKCA,PLCG1
ATM Signaling	0.719		0.203	PPM1D,RNF168,CHEK2,CREB1,RAD50,RNF8,SMC1A,MRE11,NFKBIA,TP53,RBBP8,CDKN1A,TP73,CCNB1,TRRAP,CHEK1
Coagulation System	0.724		0.229	F2R,THBD,F3,F8,SERPINE1,BDKRB2,F5,F2
Corticotropin Releasing Hormone Signaling	0.725		0.196	GNAI1,CREB1,CALM1 (includes others),NPR1,GNAO1,PTCH1,BORCS8-MEF2B,MEF2C,ELK1,ARPC5,PRKCA,RAP1B,PLCG1,ADCY2,MEF2B,NOS3,POMC,BDNF,MEF2A,ADCY9,PRKAR2A
PPAR Signaling	0.726		0.2	MAP3K7,PDGFRB,MAP4K4,PDGFD,PDGFRA,TNFRSF1A,MRAS,MED1,HSP90B1,INSR,IL36B,IKBKB,NFKBIA,IL1R1,IL1RL2,RXRA,TAB1,NCOR1
3-phosphoinositide Biosynthesis	0.732		0.187	NUDT1,PPP2R5E,PTEN,DOT1L,PTPN22,PPP2R3A,PIK3R1,MTMR2,DUSP28,PTPRH,INPP5B,OCRL,TNS3,SSH3,MET,PTPRF,PIP5K1C,SIRPA,CD86,G6PC2,PALD1,PDGFRB,INPP5F,PDGFRA,DUSP27,PDCD1,DUSP2,PTPN1,CILP,PI4KB,CD28,PI4K2A,PPM1K,CDIPT,PIP5K1B,PPFIA4
Folate Polyglutamylation	0.734		0.4	MTHFD1L,FPGS
Glycerol Degradation I	0.734		0.4	GK,GK5
NAD Salvage Pathway III	0.734		0.4	NMNAT2,NMNAT1
Protein Citrullination	0.734		0.4	PADI4,PADI3
Sperm Motility	0.735		0.195	PLCB1,PLA2G4E,PDE4A,CALM1 (includes others),NPR1,CNGB1,PLCB2,PTK6,PLA2G16,PLCB4,MRAS,PRKG1,PDE1B,PLA2G4F,PDE2A,TXK,SLC12A2,PRKCA,PLCG1,PDE1C,PNPLA8,PLA2R1,PRKAR2A
Glioblastoma Multiforme Signaling	0.738		0.19	PDGFD,PTEN,AKT3,PLCB2,WNT5A,MRAS,PIK3R1,TP53,WNT8B,WNT2,E2F2,CDKN1A,FZD3,TSC1,FOXO1,WNT3A,PLCB1,PDGFRB,TCF3,PDGFRA,LEF1,PLCB4,WNT7B,WNT5B,AKT2,CDKN1B,PLCG1,WNT4,RHOU,WNT9A
DNA damage-induced 14-3-3σ Signaling	0.75		0.263	AKT3,AKT2,RAD1,TP53,CCNB1
Putrescine Degradation III	0.75		0.263	ALDH1A2,ALDH3B1,ALDH1L2,ALDH1B1,MAOA
Regulation of IL-2 Expression in Activated and Anergic T Lymphocytes	0.752		0.205	CALM1 (includes others),CD3G,MRAS,CHP1,PPP3CB,IKBKB,NFKBIA,PPP3CC,ELK1,MALT1,CD28,BCL10,SMAD3,PLCG1,TGFBR1,VAV3
CDP-diacylglycerol Biosynthesis I	0.754		0.25	GPAT4,LPCAT1,LPCAT3,MBOAT7,GPAM,CDS2
Glucocorticoid Receptor Signaling	0.775		0.183	POU2F1,HSPA2,GTF2B,MRAS,CHP1,POLR2F,NFKBIA,KRT32,ELK1,SMAD3,GTF2E1,TGFBR1,POLR2J2/POLR2J3,POMC,ESR1,TAF1,ERCC2,MED1,HSP90B1,IKBKB,CCL11,TAT,AR,CREBZF,SERPINE1,PRKAB2,AKT3,GTF2H3,CREB1,PBRM1,TAF3,TAF5,PIK3R1,IL6,PPP3CC,FKBP5,TSC22D3,GTF2F1,CDKN1A,NCOR1,MAP3K7,TAF2,CD3G,PPP3CB,BAG1,AKT2,CCNH,PBX1,UBE2I,ARID2,HSPA5,TAB1
Prostanoid Biosynthesis	0.785		0.333	HPGDS,PTGES,PTGIS
Thyroid Cancer Signaling	0.788		0.231	CXCL12,GDNF,TCF3,LEF1,MRAS,RXRA,KLK3,BDNF,TP53
tRNA Splicing	0.788		0.231	PDE12,PDE4A,PLD6,TSEN2,PDE7B,PDE1B,PDE1C,PDE2A,APEX1
G Beta Gamma Signaling	0.789		0.205	GNAI1,AKT3,GNAO1,RACK1,MRAS,PAK1,GNG7,AKT2,KCNJ3,ARHGEF6,PRKCA,GNG4,KCNJ5,PLCG1,ADCY2,GNG2,GNAT1,PRKAR2A
4-hydroxybenzoate Biosynthesis	0.794		1	TAT,
4-hydroxyphenylpyruvate Biosynthesis	0.794		1	TAT,
Acetyl-CoA Biosynthesis III (from Citrate)	0.794		1	ACLY,
Alanine Biosynthesis III	0.794		1	NFS1,
D-mannose Degradation	0.794		1	MPI,
L-cysteine Degradation II	0.794		1	CTH,
Phosphatidylethanolamine Biosynthesis III	0.794		1	PTDSS2,
Thiamin Salvage III	0.794		1	TPK1,
UDP-N-acetyl-D-galactosamine Biosynthesis I	0.794		1	GALE,
Amyotrophic Lateral Sclerosis Signaling	0.8		0.2	RNF19A,CACNA1E,AKT3,PAK1,GRID1,CAPN8,PIK3R1,TP53,GDNF,RAB5C,NAIP,GRIA3,RAB5B,CAPN5,CAPN6,GRID2,CACNA1C,GRIK3,VEGFC,CACNA1D,CAPNS1,CAPN7
Triacylglycerol Biosynthesis	0.802		0.227	GPAT4,LPIN1,LPCAT1,LPCAT3,MBOAT7,GPAM,DGAT1,LIPT2,ELOVL6,PLPP1
D-myo-inositol-5-phosphate Metabolism	0.809		0.194	NUDT1,PPP2R5E,PTEN,TMEM55A,PLCB2,DOT1L,PTPN22,PPP2R3A,MTMR2,DUSP28,PTPRH,INPP5B,OCRL,TNS3,SSH3,PTPRF,SIRPA,G6PC2,PALD1,PLCB1,INPP5F,PLCB4,DUSP27,PDCD1,DUSP2,PTPN1,CILP,PPM1K,PLCG1,PPFIA4
Relaxin Signaling	0.816		0.195	GNAI1,AKT3,CREB1,PDE4A,NPR1,GNAO1,MRAS,GNG7,PIK3R1,NFKBIA,ELK1,GNG4,PDE7B,PDE1C,ADCY2,NOS3,PRKAR2A,PDE12,RACK1,PDE1B,PDE2A,AKT2,PLD6,RAP1B,GNG2,GNAT1,APEX1,RLN3,ADCY9
Cell Cycle: G2/M DNA Damage Checkpoint Regulation	0.817		0.224	TOP2A,PPM1D,YWHAG,CHEK2,PTPMT1,CDKN1A,TRIP12,RPS6KA1,TP53,CCNB1,CHEK1
Fatty Acid α-oxidation	0.825		0.278	ALDH1A2,ALDH3B1,ALDH1L2,ALDH1B1,TMLHE
TREM1 Signaling	0.841		0.214	AKT3,NLRC5,CD40,IL6,AKT2,LAT2,NLRP10,TLR3,CASP5,PLCG1,TLR6,NLRP6,TLR2,CD86,CIITA
Bile Acid Biosynthesis, Neutral Pathway	0.846		0.308	AKR1D1,HSD3B7,CYP3A4,AKR1C1/AKR1C2
NAD biosynthesis II (from tryptophan)	0.846		0.308	NMNAT2,NMNAT1,HAAO,KYNU
Cardiac β-adrenergic Signaling	0.861		0.199	PPP2R5E,AKAP10,PDE4A,MRAS,GNG7,PPP2R3A,PPP1R3C,GNG4,PDE7B,PDE1C,ADCY2,CACNA1D,AKAP1,PRKAR2A,PDE12,CACNA1E,RACK1,ADRB1,AKAP8,PDE1B,PDE2A,PLD6,CACNA1C,GNG2,APEX1,RYR2,ADCY9
PTEN Signaling	0.865		0.202	PDGFRB,PTEN,AKT3,INPP5F,PDGFRA,MRAS,INSR,IKBKB,PIK3R1,MAGI2,AKT2,IGF2R,FOXO6,BMPR1A,BMPR2,INPP5B,OCRL,CDKN1B,GHR,CDKN1A,SYNJ2,TGFBR1,TNFRSF11A,FOXO1
Dopamine-DARPP32 Feedback in cAMP Signaling	0.876		0.196	GNAI1,PPP2R5E,CSNK1A1,CREB1,CALM1 (includes others),PLCB2,CHP1,PPP2R3A,PPP3CC,PPP1R3C,KCNJ12,ADCY2,CAMKK2,CSNK1G1,CACNA1D,PRKAR2A,PLCB1,CACNA1E,PLCB4,PRKG1,PPP3CB,KCNJ4,KCNJ14,CAMKK1,KCNJ3,PRKCA,CACNA1C,KCNJ5,PLCG1,KCNJ16,ADCY9
Chondroitin Sulfate Biosynthesis	0.877		0.226	B4GALT7,HS3ST3B1,CHST3,HS6ST3,NDST3,CHSY3,CHST7,NDST4,CSGALNACT1,HS3ST1,CHST1,UST
Cardiac Hypertrophy Signaling	0.882		0.19	GNAI1,CREB1,CALM1 (includes others),PLCB2,GNAO1,MRAS,GNG7,CHP1,EIF2B3,PIK3R1,IL6,PPP3CC,ELK1,GNG4,EIF2B1,ADCY2,MEF2B,TGFBR1,EIF2B2,CACNA1D,ADRA1A,PRKAR2A,PLCB1,MAP3K7,CACNA1E,RACK1,PLCB4,MYL2,ADRB1,PPP3CB,ADRA2B,BORCS8-MEF2B,MEF2C,HAND1,MAP3K2,CACNA1C,RPS6KA1,PLCG1,TAB1,GNG2,GNAT1,RHOU,MEF2A,ADCY9
PI3K Signaling in B Lymphocytes	0.883		0.202	PTEN,AKT3,CREB1,CALM1 (includes others),C3,PLCB2,MRAS,CHP1,CAMK2D,PIK3R1,CD40,NFKBIA,PPP3CC,ELK1,MALT1,BCL10,PLEKHA1,VAV3,PLCB1,PLCB4,PPP3CB,IKBKB,AKT2,ATF7,PLCG1
Dermatan Sulfate Biosynthesis (Late Stages)	0.903		0.238	HS3ST3B1,CHST3,HS6ST3,NDST3,CHST7,NDST4,HS3ST1,CHST1,UST,CHST14
Histidine Degradation III	0.908		0.375	HAL,MTHFD1L,MTHFD2
Arsenate Detoxification I (Glutaredoxin)	0.908		0.5	GLRX2,AS3MT
NAD Biosynthesis III	0.908		0.5	NMNAT2,NMNAT1
Retinoate Biosynthesis II	0.908		0.5	RBP2,RBP5
3-phosphoinositide Degradation	0.912		0.199	NUDT1,PPP2R5E,PTEN,TMEM55A,DOT1L,PTPN22,PPP2R3A,MTMR2,MTMR3,DUSP28,PTPRH,INPP5B,OCRL,TNS3,SSH3,SYNJ2,PTPRF,SIRPA,G6PC2,PALD1,MTMR1,INPP5F,PTPMT1,DUSP27,PDCD1,DUSP2,PTPN1,CILP,PPM1K,PPFIA4
p38 MAPK Signaling	0.926		0.205	MAP3K7,PLA2G4E,MAPKAPK5,CREB1,TNFRSF1A,MKNK2,H3F3A/H3F3B,IL36B,PLA2G4F,BORCS8-MEF2B,TRADD,MEF2C,TP53,EEF2K,ELK1,HIST1H3C,IL1R1,IL1RL2,RPS6KA1,TAB1,MEF2B,TGFBR1,FAS,MEF2A
Estrogen Receptor Signaling	0.929		0.203	GTF2B,GTF2H3,MRAS,POLR2F,TAF3,TAF5,RBFOX2,MED18,HIST1H3C,GTF2F1,NCOR1,GTF2E1,POLR2J2/POLR2J3,ESR1,NR0B1,TAF1,TRRAP,G6PC2,ERCC2,MED13L,TAF2,MED1,H3F3A/H3F3B,CDK8,CCNH,PHB2
G-Protein Coupled Receptor Signaling	0.93		0.189	ADORA2A,LPAR1,APLNR,PLCB2,MRAS,NFKBIA,GRM4,PDE1C,CCR4,RXFP4,DUSP4,PRKAR2A,PDE12,PLCB4,IKBKB,ADRA2B,LAMTOR3,HRH2,GNAI1,AKT3,CREB1,PDE4A,GNAO1,S1PR3,CAMK2D,PIK3R1,FFAR3,PDE7B,ADCY2,LHCGR,ADRA1A,HTR2A,PLCB1,RGS18,GRK4,ADRB1,PDE1B,PDE2A,CNR2,AKT2,MC1R,ADORA2B,LTB4R,PRKCA,PLD6,RPS6KA1,RGS4,APEX1,ADCY9,XCR1,HTR4
Role of BRCA1 in DNA Damage Response	0.951		0.218	POU2F1,RFC3,CHEK2,RAD50,PBRM1,FANCC,MRE11,FANCM,TP53,RBBP8,ARID2,E2F2,CDKN1A,RFC2,RPA1,MSH2,CHEK1
Retinoate Biosynthesis I	0.951		0.258	ALDH1A2,NT5C1B,RBP2,SDR9C7,RDH13,SDR16C5,RDH10,RBP5
Role of NFAT in Cardiac Hypertrophy	0.951		0.196	GNAI1,CSNK1A1,AKT3,CALM1 (includes others),PLCB2,RCAN3,MRAS,GNG7,CHP1,CAMK2D,PIK3R1,IL6,PPP3CC,IL11,GNG4,ADCY2,MEF2B,TGFBR1,HDAC11,PRKAR2A,PLCB1,HDAC5,MAP3K7,RCAN1,RACK1,PLCB4,PPP3CB,BORCS8-MEF2B,AKT2,MEF2C,HAND1,CABIN1,PRKCA,PLCG1,GNG2,MEF2A,ADCY9
Complement System	0.952		0.25	MASP1,CD59,C3,C5AR1,C1QB,CD55,C1S,CFD,SERPING1
Phosphatidylglycerol Biosynthesis II (Non-plastidic)	0.956		0.269	GPAT4,LPCAT1,LPCAT3,MBOAT7,PTPMT1,GPAM,CDS2
Salvage Pathways of Pyrimidine Ribonucleotides	0.96		0.213	POMK,CSNK1A1,PAK2,DMPK,LIMK2,GRK4,NME3,AK9,PAK1,HIPK1,LIMK1,AICDA,UPP2,CDK8,AKT2,PYCRL,AK5,APOBEC3F,FAM20B,GRK6
Wnt/β-catenin Signaling	0.962		0.199	PPP2R5E,CSNK1A1,AKT3,WNT5A,GNAO1,PPP2R3A,NR5A2,TP53,WNT8B,AXIN2,WNT2,TGFBR1,FZD3,CSNK1G1,SOX2,WNT3A,SOX6,MAP3K7,TCF3,SOX5,LEF1,WNT7B,WNT5B,AKT2,ACVR1B,SOX10,BMPR2,TLE3,SFRP4,TAB1,WNT4,DKK4,WNT9A
Androgen Signaling	0.974		0.209	GNAI1,GTF2B,ERCC2,GTF2H3,CALM1 (includes others),DNAJB1,TAF2,GNAO1,RACK1,MRAS,GNG7,POLR2F,AR,PRKCA,CCNH,GTF2F1,SMAD3,GNG4,GTF2E1,GNG2,GNAT1,POLR2J2/POLR2J3,PRKAR2A
Antioxidant Action of Vitamin C	0.976		0.212	PLCB1,PLA2G4E,NXN,GLRX,PLCB2,PLA2G16,CSF2RB,PLCB4,SLC2A2,TXNRD1,PLA2G4F,IKBKB,PLD1,SLC2A1,NFKBIA,SLC2A4,PLD6,PLCG1,PNPLA8,TXNRD2,PLA2R1
Apoptosis Signaling	0.981		0.216	MAP4K4,TNFRSF1A,MRAS,IKBKB,CAPN8,NFKBIA,ACIN1,TP53,NAIP,PRKCA,CAPN5,CAPN6,RPS6KA1,PLCG1,GAS2,FAS,CASP2,CAPNS1,CAPN7
Role of Osteoblasts, Osteoclasts and Chondrocytes in Rheumatoid Arthritis	0.993		0.194	CSNK1A1,AKT3,SP7,CALM1 (includes others),WNT5A,TNFRSF1A,CHP1,IL36B,COL1A1,PIK3R1,IL6,NFKBIA,PPP3CC,BMP8A,WNT8B,IL11,IL1R1,WNT2,BMP4,IL1RL2,ITGB3,FZD3,TNFRSF11A,SMURF1,FOXO1,WNT3A,MAP3K7,TCF3,LEF1,WNT7B,WNT5B,PPP3CB,IKBKB,TRADD,AKT2,BMPR1A,BMPR2,NAIP,SFRP4,BMP1,CSF1,WNT4,DKK4,WNT9A
Superpathway of Inositol Phosphate Compounds	0.993		0.194	NUDT1,PPP2R5E,PTEN,TMEM55A,PLCB2,DOT1L,PTPN22,PPP2R3A,PIK3R1,MTMR2,DUSP28,PTPRH,INPP5B,OCRL,TNS3,SSH3,MET,SYNJ2,PTPRF,PIP5K1C,SIRPA,CD86,SEC16A,PMPCA,G6PC2,PALD1,PLCB1,PDGFRB,INPP5F,PDGFRA,PLCB4,DUSP27,PDCD1,DUSP2,PTPN1,CILP,PI4KB,CD28,PI4K2A,PPM1K,CDIPT,PLCG1,PIP5K1B,PPFIA4
Mismatch Repair in Eukaryotes	1		0.312	RFC3,RFC2,RPA1,MSH2,MSH3
RAN Signaling	1		0.312	KPNA1,CSE1L,RANBP1,KPNB1,TNPO1
RhoA Signaling	1.01		0.208	LPAR6,LPAR1,LIMK1,ARPC5L,SEPT12,PLD1,MYLK3,RHPN2,ARPC5,DLC1,ARPC4,PIP5K1C,LIMK2,CDC42EP4,MYL2,ARHGAP35,ARHGAP1,SEPT6,SEPT2,CFL2,PLXNA1,NEDD4,CIT,MYLK,PIP5K1B
Stearate Biosynthesis I (Animals)	1.01		0.25	ACSL4,SLC27A1,SRD5A3,DHCR24,MBOAT7,BDH2,LIPT2,THEM4,ACSL6,ELOVL6
Chondroitin Sulfate Biosynthesis (Late Stages)	1.02		0.244	HS3ST3B1,CHST3,HS6ST3,NDST3,CHSY3,CHST7,NDST4,CSGALNACT1,HS3ST1,CHST1,UST
Cellular Effects of Sildenafil (Viagra)	1.02		0.208	PDE4A,CALM1 (includes others),PLCB2,CACNG3,KCNQ2,MYH11,PDE1C,ADCY2,SLC4A5,NOS3,CACNA1D,PRKAR2A,PLCB1,CACNA1E,PLCB4,MYL2,PRKG1,PDE1B,PDE2A,SLC4A10,MYLK,CACNA1C,PLCG1,KCNQ3,ADCY9,CACNG4
Amyloid Processing	1.02		0.24	CSNK1A1,CDK5R1,AKT3,CAPN5,BACE2,CAPN6,CAPN8,AKT2,CAPNS1,CAPN7,PSEN1,PRKAR2A
Dermatan Sulfate Biosynthesis	1.03		0.236	HS3ST3B1,CHST3,HS6ST3,NDST3,CHSY3,CSGALNACT1,UST,B4GALT7,CHST7,NDST4,HS3ST1,CHST1,CHST14
Role of CHK Proteins in Cell Cycle Checkpoint Control	1.03		0.236	PPP2R5E,RFC3,CHEK2,RAD50,PPP2R3A,MRE11,RAD1,TP53,E2F2,CDKN1A,RFC2,RPA1,CHEK1
Molecular Mechanisms of Cancer	1.04		0.188	PLCB2,MRAS,NFKBIA,ELK1,BMP8A,RALB,ARHGEF6,BMP4,SMAD3,TGFBR1,PRKAR2A,ARHGEF10,LEF1,PLCB4,BMPR1A,BMPR2,RALBP1,CDKN1B,ARHGEF2,LAMTOR3,RAP1B,GNAT1,ARHGEF9,FAS,RHOU,GNAI1,ARHGEF15,RASGRF1,AKT3,CHEK2,WNT5A,GNAO1,PTCH1,CAMK2D,PIK3R1,TP53,WNT8B,WNT2,E2F2,CDKN1A,SIN3A,ADCY2,CRK,FZD3,FOXO1,WNT3A,ARHGEF18,PSEN1,PLCB1,MAP3K7,PAK2,TCF3,WNT7B,PAK1,WNT5B,ZBTB17,AKT2,NAIP,SUFU,GAB2,PRKCA,HIF1A,BMP1,TAB1,WNT4,PAK…
Neuregulin Signaling	1.06		0.221	RPS6,PTEN,AKT3,ERBIN,CRKL,MRAS,HSP90B1,NRG2,PIK3R1,AKT2,ELK1,CDK5R1,PRKCA,CDKN1B,DCN,PLCG1,CRK,NRG4,PSEN1
Pyridoxal 5'-phosphate Salvage Pathway	1.1		0.234	POMK,CSNK1A1,PAK2,DMPK,LIMK2,GRK4,PAK1,HIPK1,LIMK1,CDK8,AKT2,FAM20B,GRK6,PDXK,PNPO
Histamine Degradation	1.1		0.333	HNMT,ALDH1A2,ALDH3B1,ALDH1L2,ALDH1B1
Superpathway of D-myo-inositol (1,4,5)-trisphosphate Metabolism	1.11		0.292	INPP5B,PTEN,OCRL,INPP5F,SYNJ2,SEC16A,PMPCA
PPARα/RXRα Activation	1.12		0.205	PLCB2,MRAS,CYP2C19,IL6,NFKBIA,NR2C2,IL1R1,GHR,SMAD3,IL1RL2,RXRA,ADCY2,NCOR1,TGFBR1,CHD5,PRKAR2A,PLCB1,SLC27A1,MAP3K7,MAP4K4,PLCB4,MED1,HSP90B1,INSR,IKBKB,MEF2C,ACVR1B,BMPR2,GK,PRKCA,APOA1,PLCG1,ADCY9,PRKAB2
PI3K/AKT Signaling	1.12		0.213	PPP2R5E,PTEN,AKT3,MRAS,PPP2R3A,PIK3R1,NFKBIA,TP53,INPP5B,OCRL,CDKN1A,SYNJ2,NOS3,TSC1,EIF4EBP1,FOXO1,NANOG,YWHAG,INPP5F,HSP90B1,IKBKB,AKT2,THEM4,GAB2,GYS1,CDKN1B
AMPK Signaling	1.12		0.202	PPP2R5E,PPM1D,AKT3,STRADA,CREB1,PBRM1,CHRNA10,MRAS,CPT1A,PPP2R3A,PIK3R1,FOXO6,CDKN1A,AK5,NOS3,CAMKK2,TSC1,EIF4EBP1,FOXO1,ADRA1A,PRKAR2A,CHRNA5,MAP3K7,ADRB1,INSR,ADRA2B,SLC2A1,AKT2,EEF2K,CHRNB4,RPTOR,SLC2A4,GYS1,ARID2,LEP,CHRNA4,PRKAB2,PFKL
Nur77 Signaling in T Lymphocytes	1.14		0.245	CALM1 (includes others),HLA-DOA,CD3G,CHP1,PPP3CB,PPP3CC,HLA-A,CD28,CABIN1,MAP3K2,RXRA,SIN3A,CD86
1D-myo-inositol Hexakisphosphate Biosynthesis II (Mammalian)	1.15		0.316	INPP5B,OCRL,INPP5F,SYNJ2,SEC16A,PMPCA
Cardiomyocyte Differentiation via BMP Receptors	1.15		0.316	BMPR1A,BMPR2,MAP3K7,BMP4,MYL2,MEF2C
Tyrosine Biosynthesis IV	1.16		0.667	PAH,PCBD1
Calcium Signaling	1.16		0.206	CREB1,CALM1 (includes others),CHRNA10,RCAN3,TPM4,CHP1,TNNI1,CAMK2D,MICU1,PPP3CC,ATP2B2,GRIA3,CHRND,MYH11,MEF2B,TPM2,CAMKK2,HDAC11,TPM1,PRKAR2A,HDAC5,CHRNA5,TRPC4,RCAN1,MYL2,PPP3CB,CAMKK1,BORCS8-MEF2B,MEF2C,CABIN1,CHRNB4,RAP1B,CHRNA4,RYR2,MEF2A
Insulin Receptor Signaling	1.17		0.212	GRB10,PTEN,AKT3,VAMP2,MRAS,EIF2B3,PIK3R1,INPP5B,OCRL,PPP1R3C,EIF2B1,SYNJ2,PTPRF,CRK,EIF2B2,TSC1,EIF4EBP1,FOXO1,PRKAR2A,INPP5F,CRKL,INSR,AKT2,PTPN1,RPTOR,SLC2A4,GYS1,ACLY,SCNN1B
Axonal Guidance Signaling	1.17		0.188	C9orf3,PLCB2,MRAS,LIMK1,GNG7,CHP1,EFNA5,PLXNB1,BMP8A,CHMP1A,ARPC5,ARHGEF6,BMP4,GNG4,SEMA3C,HKR1,FES,BDNF,VEGFC,PRKAR2A,EFNB1,CRKL,PLCB4,SEMA6A,DPYSL2,EPHB2,SEMA4B,CFL2,PLXNA1,SLIT2,SHANK2,NCK2,NRP1,RAP1B,GNAT1,SEMA4D,GNAI1,ARHGEF15,CXCL12,PDGFD,AKT3,SEMA3E,WNT5A,GNAO1,PTCH1,EPHA3,ARPC5L,PIK3R1,PPP3CC,WNT8B,WNT2,ARPC4,MET,CRK,FZD3,ECE2,KALRN,EFNA2,WNT3A,EPHA10,PLCB1,PLXNB3,PAK2,LIMK2,ITSN1,NTN1,RA…
Role of NFAT in Regulation of the Immune Response	1.19		0.206	GNAI1,CSNK1A1,AKT3,CALM1 (includes others),PLCB2,GNAO1,RCAN3,MRAS,GNG7,CHP1,PIK3R1,NFKBIA,PPP3CC,MS4A2,GNG4,CD4,MEF2B,CSNK1G1,CD86,PLCB1,HLA-DOA,RCAN1,RACK1,CD3G,PLCB4,PPP3CB,IKBKB,BORCS8-MEF2B,AKT2,MEF2C,HLA-A,CD28,CABIN1,PLCG1,GNG2,GNAT1,MEF2A
Fcγ Receptor-mediated Phagocytosis in Macrophages and Monocytes	1.21		0.226	HCK,PTEN,AKT3,PAK1,NCF1,PXN,ARPC5L,PLD1,PIK3R1,AKT2,ARPC5,MYO5A,GAB2,PRKCA,VAMP3,NCK2,ARPC4,PLD6,PLCG1,CRK,VAV3
Glycogen Biosynthesis II (from UDP-D-Glucose)	1.25		0.5	GYG2,GYS1,GYG1
Thioredoxin Pathway	1.25		0.5	NXN,TXNRD1,TXNRD2
D-myo-inositol (1,4,5)-trisphosphate Degradation	1.25		0.333	INPP5B,OCRL,INPP5F,SYNJ2,SEC16A,PMPCA
Caveolar-mediated Endocytosis Signaling	1.26		0.239	ITSN1,INSR,ITGA11,B2M,ITGA9,FLOT2,PTPN1,RAB5C,HLA-A,RAB5B,PRKCA,MAP3K2,COPA,COPE,CD55,ITGB3,ARCN1
RhoGDI Signaling	1.27		0.209	GNAI1,ARHGEF15,GNAO1,MRAS,LIMK1,GNG7,ARPC5L,ARPC5,ARHGEF6,DLC1,ARPC4,GNG4,PIP5K1C,ESR1,ARHGEF18,GDI1,CDH13,PAK2,LIMK2,ARHGEF10,RACK1,MYL2,PAK1,ARHGAP35,CDH7,ARHGAP1,CFL2,CDH18,PRKCA,ARHGEF2,GNG2,PAK4,GNAT1,ARHGEF9,PIP5K1B,RHOU
Assembly of RNA Polymerase II Complex	1.31		0.26	GTF2B,ERCC2,DR1,GTF2H3,TAF2,POLR2F,TAF3,TAF5,CCNH,GTF2F1,GTF2E1,POLR2J2/POLR2J3,TAF1
Protein Kinase A Signaling	1.35		0.194	PTEN,DUSP3,CNGB1,PLCB2,GNG7,CHP1,KDELR3,MTMR3,MYLK3,NFKBIA,ANAPC1,ELK1,PTPN18,HIST1H3C,SMAD3,GNG4,PTPN21,PTPRF,PDE1C,NOS3,TGFBR1,DUSP4,AKAP1,PRKAR2A,PDE12,YWHAG,LEF1,PLCB4,H3F3A/H3F3B,RHO,DUSP2,PTPN1,GYS1,MYLK,RAP1B,DUSP7,GNAI1,CDC14B,AKAP10,PHKA2,CREB1,PDE4A,CALM1 (includes others),PTCH1,TNNI1,CAMK2D,PTPN22,PPP3CC,PTPRH,KDELR1,PPP1R3C,PDE7B,ADCY2,SIRPA,PLCB1,TCF3,NTN1,RACK1,MYL2,AKAP8,PDE1B,PXN,…
Nucleotide Excision Repair Pathway	1.36		0.286	RAD23B,ERCC1,ERCC2,ERCC4,GTF2H3,CCNH,ERCC8,POLR2F,RPA1,POLR2J2/POLR2J3
Folate Transformations I	1.37		0.444	MTR,MTHFD1L,MTHFR,MTHFD2
cAMP-mediated signaling	1.48		0.209	GNAI1,AKAP10,ADORA2A,LPAR1,APLNR,CREB1,PDE4A,CALM1 (includes others),CNGB1,GNAO1,S1PR3,CAMK2D,FFAR3,PPP3CC,GRM4,PDE7B,PDE1C,ADCY2,CCR4,LHCGR,RXFP4,DUSP4,AKAP1,PRKAR2A,PDE12,RGS18,GRK4,ADRB1,AKAP8,PDE1B,PPP3CB,ADRA2B,PDE2A,CNR2,MC1R,ADORA2B,LTB4R,PLD6,LAMTOR3,RPS6KA1,RGS4,APEX1,ADCY9,HRH2,XCR1,HTR4
Tetrahydrofolate Salvage from 5,10-methenyltetrahydrofolate	1.49		0.6	GART,MTHFD1L,MTHFD2
Maturity Onset Diabetes of Young (MODY) Signaling	1.51		0.35	FABP1,CACNA1E,SLC2A2,CACNA1C,INSR,HNF1B,CACNA1D
L-glutamine Biosynthesis II (tRNA-dependent)	1.59		1	QRSL1,GATB
Uridine-5'-phosphate Biosynthesis	1.59		1	UMPS,CAD
D-myo-inositol (1,3,4)-trisphosphate Biosynthesis	1.64		0.368	INPP5B,PTEN,OCRL,INPP5F,SYNJ2,SEC16A,PMPCA
Telomere Extension by Telomerase	1.64		0.4	POT1,TERF2,TERF1,RAD50,TINF2,MRE11
Basal Cell Carcinoma Signaling	1.65		0.261	TCF3,WNT5A,PTCH1,LEF1,WNT7B,WNT5B,TP53,BMP8A,WNT8B,SUFU,WNT2,BMP4,BMP1,WNT4,HKR1,FZD3,WNT3A,WNT9A
D-myo-inositol (1,4,5)-Trisphosphate Biosynthesis	1.68		0.333	PLCB1,PI4KB,PI4K2A,PLCB2,PLCB4,CDIPT,PLCG1,PIP5K1C,PIP5K1B
Ephrin B Signaling	1.71		0.26	GNAI1,CXCL12,EFNB1,ITSN1,GNAO1,RACK1,MRAS,PAK1,LIMK1,GNG7,PXN,EPHB2,CFL2,NCK2,GNG4,GNG2,GNAT1,KALRN,VAV3
Hypoxia Signaling in the Cardiovascular System	1.73		0.27	UBE2J1,PTEN,CREB1,UBE2H,HSP90B1,NFKBIA,TP53,UBE2G1,UBE2E2,VHL,EPO,SLC2A4,UBE2I,HIF1A,UBE2V2,ARNT,NOS3
Adipogenesis pathway	1.78		0.235	GTF2H3,ATG5,WNT5A,TNFRSF1A,PER2,TP53,LPIN1,BMP4,SMAD3,SIN3A,RBBP4,FZD3,HDAC11,FOXO1,HDAC5,ERCC2,SREBF1,FABP4,RPS6KC1,BMPR1A,BMPR2,KDM1A,CCNH,SLC2A4,HIF1A,XBP1,ZNF423,RPS6KA1,EGR2,SAP130,LEP
Vitamin-C Transport	1.8		0.429	NXN,GLRX,SLC2A4,TXNRD1,SLC2A1,TXNRD2
Phenylalanine Degradation I (Aerobic)	1.84		0.75	QDPR,PAH,PCBD1
Ephrin Receptor Signaling	1.85		0.227	GNAI1,ARHGEF15,CXCL12,PDGFD,AKT3,CREB1,GNAO1,MRAS,LIMK1,GNG7,EPHA3,EFNA5,ARPC5L,ARPC5,ARPC4,GNG4,CRK,VEGFC,KALRN,EFNA2,EPHA10,DOK1,MAP4K4,EFNB1,PAK2,LIMK2,ITSN1,CRKL,RACK1,PAK1,PXN,EPHB2,AKT2,CFL2,NCK2,RAP1B,GNG2,PAK4,GNAT1
UDP-N-acetyl-D-glucosamine Biosynthesis II	2.12		0.667	GFPT2,UAP1,PGM3,FMO3
Human Embryonic Stem Cell Pluripotency	2.13		0.243	S1PR2,PDGFD,AKT3,WNT5A,MRAS,S1PR3,KLK3,PIK3R1,BMP8A,WNT8B,WNT2,BMP4,SMAD3,TGFBR1,FZD3,BDNF,SOX2,FOXO1,WNT3A,NANOG,PDGFRB,TCF3,PDGFRA,LEF1,WNT7B,WNT5B,TDGF1,AKT2,BMPR1A,BMPR2,BMP1,FOXD3,WNT4,WNT9A
G Protein Signaling Mediated by Tubby	2.18		0.355	PLCB1,PLCB2,RACK1,PLCB4,MRAS,GNG4,TUB,GNG7,INSR,PLCG1,GNG2
Semaphorin Signaling in Neurons	2.22		0.308	SEMA4D,PAK2,LIMK2,PAK1,LIMK1,ARHGAP1,CRMP1,DPYSL2,PLXNB1,CFL2,PLXNA1,NRP1,MET,PAK4,FES,RHOU
Role of Oct4 in Mammalian Embryonic Stem Cell Pluripotency	2.48		0.333	NANOG,NR5A2,NR2F6,TP53,CDX2,FOXA1,SH3GLB1,JARID2,FOXD3,WWP2,SOX2,NR6A1,CCNF,MEF2A,KDM5B
Upstream Regulators
Analysis	Upstream Regulator	Molecule Type	Predicted Activation State	Activation z-score	Notes	Bias Term	Bias-corrected z-score	p-value of overlap	Target molecules in dataset	Mechanistic Network
hsa-miR-376a-2-5p	PRKAA2	kinase						0.000719	CDKN1A,EPO,HIF1A,TP53
hsa-miR-376a-2-5p	mir-10	microrna						0.00142	AR,BMPR2,DGAT1,EPHB2,FOXA1,GAB2,KLF13,MKNK2,PSMD8,RPS6KA1,SGPL1,TDG,TGFBR1,TP53,TRA2B
hsa-miR-376a-2-5p	miR-221-3p (and other miRNAs w/seed GCUACAU)	mature microrna						0.00184	CDKN1B,KLK3,PIK3R1,PTEN,TIMP3
hsa-miR-376a-2-5p	FSH	complex						0.00273	ACP2,ADCY9,AMOTL2,ARHGAP1,ARHGAP35,ARL4C,ARPC4,ATP9A,AXL,BAG1,BDNF,BECN1,BMPR1A,BMPR2,BTG2,CD55,CDC42EP4,CDK14,CREBZF,CSNK1A1,DUSP3,FDX1,FILIP1L,FKBP5,FOXK2,GBP1,GK,GNLY,HDAC5,IL6,ING1,ING2,KLF10,KRT18,LDLR,LHCGR,MAMLD1,MAP1LC3B,MAP3K7,MAP4K4,MT1H,NPC2,PDLIM3,PDXK,PHKA2,PI4K2A,PLPP1,PPFIA4,PRNP,PTPN1,PTPN21,PTPRF,RAB5C,RASSF2,RGS4,SNAP23,TP53,TPM1,TPM2,VEGFC,YTHDF2,ZBED1
hsa-miR-376a-2-5p	CTBP1-AS2	other						0.00439	CDKN1A,SMAD3,TP53
hsa-miR-376a-2-5p	HOXB1	transcription regulator						0.00439	HOXB2,HOXB3,HOXB4
hsa-miR-376a-2-5p	PRLR	transmembrane receptor						0.00439	CDKN1A,GHR,VDR
hsa-miR-376a-2-5p	SMAD2	transcription regulator						0.00577	CDX2,FN1,HAS2,MIXL1,NANOG,SERPINE1,SNAI1,SOX2,TIMP3,VEGFC
hsa-miR-376a-2-5p	BRD7	transcription regulator						0.00725	CDKN1A,DICER1,ESR1,PYCARD,TRIM22,VCAN
hsa-miR-376a-2-5p	PTEN	phosphatase						0.00784	AR,CCNB1,CDKN1A,CDKN1B,ESR1,IL6,ING4,PTEN,PXN,TP53
hsa-miR-376a-2-5p	FZD8	g-protein coupled receptor						0.00816	COL1A1,FN1,TP53,VCAN
hsa-miR-376a-2-5p	TNFRSF11A	transmembrane receptor						0.00816	FN1,NANOG,SNAI1,SOX2
hsa-miR-376a-2-5p	RXRA	ligand-dependent nuclear receptor						0.00888	AKR1C1/AKR1C2,APOA1,APOC3,CTSH,CYP3A4,DR1,ENG,FOXA1,FOXA3,HAS2,HIF1A,HNF1B,NPC1L1,RXRA,SLC10A2,THBD
hsa-miR-376a-2-5p	mir-218	microrna						0.0116	LEF1,MMP24,NT5E,PDGFRA,VAV3,ZEB2
hsa-miR-376a-2-5p	USP7	peptidase						0.0134	FABP1,FKBP5,GK,KLK3,SLC2A2,TP53,TRPC4
hsa-miR-376a-2-5p	CSF1	cytokine						0.0136	CDKN1A,FAS,FN1,HSP90B1,HSPA5,IL12A,IL6,TNFRSF1A,TP53,XBP1
hsa-miR-376a-2-5p	EFNA2	kinase						0.0142	CDC5L,DCBLD2,DSC1,DUSP4,FOSL1,FOXI1,FOXL1,KLK7,KRT13,KRT18,KRT7,NT5E,PXN,TCF3,TRIM5
hsa-miR-376a-2-5p	GFI1B	transcription regulator						0.0144	ARNT,CSDE1,ELF4,GABPB2,ITSN1
hsa-miR-376a-2-5p	SFN	other						0.0144	AMOT,BTG2,F3,FKBP5,IL1R1
hsa-miR-376a-2-5p	TSC22D3	transcription regulator						0.0144	CD86,CDKN1A,CDKN1B,TLR2,TP53
hsa-miR-376a-2-5p	Cyclin E	group						0.0154	CDKN1A,CDKN1B,HIF1A
hsa-miR-376a-2-5p	DACH1	transcription regulator						0.0154	IL6,KLK3,SERPINE1
hsa-miR-376a-2-5p	H2AFZ	other						0.0154	CD69,CDKN1A,HPSE
hsa-miR-376a-2-5p	LARP1	translation regulator						0.0154	PABPC1,RPL32,RPS6
hsa-miR-376a-2-5p	NCF1	enzyme						0.0154	CDKN1A,FN1,SERPINE1
hsa-miR-376a-2-5p	RCHY1	enzyme						0.0154	CDKN1B,KLK3,TP73
hsa-miR-376a-2-5p	miR-103-3p (and other miRNAs w/seed GCAGCAU)	mature microrna						0.0154	ARNT,GRN,RPS6
hsa-miR-376a-2-5p	miR-516a-3p (and other miRNAs w/seed GCUUCCU)	mature microrna						0.0154	AR,WNT3A,WNT5A
hsa-miR-376a-2-5p	SMAD3	transcription regulator						0.0164	APOC3,C3,CD59,CDKN1A,COL1A1,FN1,HAS2,IL11,KLK3,LPAR1,NANOG,PTP4A3,SERPINE1,SNAI1,SOX2,TIMP3,VEGFC
hsa-miR-376a-2-5p	Alpha catenin	group						0.0166	AXIN2,KLK3,LEF1,NKD1
hsa-miR-376a-2-5p	C3AR1	g-protein coupled receptor						0.0166	C3,CD55,HSPA5,SREBF1
hsa-miR-376a-2-5p	XPO1	transporter						0.0166	CDKN1A,CDKN1B,MET,TP53
hsa-miR-376a-2-5p	PRKCD	kinase						0.0178	CAMSAP1,CD4,CDKN1A,CEMIP,CIITA,COL1A1,CXCL12,DENND3,ERCC6L,FOSL1,FOXP1,GRHL2,HJURP,ICOSLG/LOC102723996,IL6,LDLR,MAST4,MRPS11,NFKBIA,PLAGL2,PPP1R15A,PTCH1,SERPINE1,SETBP1,SIK3,SLITRK3,TLR2,TP53
hsa-miR-376a-2-5p	CTGF	growth factor						0.0189	EGLN3,ESR1,FN1,NANOG,SERPINE1,SOX2,TIMP3,TP53
hsa-miR-376a-2-5p	miR-22-3p (miRNAs w/seed AGCUGCC)	mature microrna						0.0189	ACVR1B,AGBL5,ARRB1,CLIP2,MTHFD2,MVB12B,PDSS1,PPP1R9A
hsa-miR-376a-2-5p	Histone h3	group						0.0211	ADGRA2,ATF7IP,B2M,CD69,CDK14,CDKN1A,CDKN1B,CIITA,ESR1,FKBP5,FOXA1,FOXP4,GABPB2,HPSE,IGF2R,IL6,ING5,KIAA0895,KLHDC10,KLK3,LARP1B,MET,MGMT,MYT1,NANOG,NCF1,NFKBIA,NKD1,NOS3,PADI3,PSG5,PTEN,PTGES,RCAN1,RPS6,SHANK3,SNUPN,SPATS2L,STOM,TGFBR1,TLR2,TOP2A,WLS,WNT8B,XBP1,ZNF423,ZNF790
hsa-miR-376a-2-5p	ATR	kinase						0.0228	CDK14,MET,MICA,RRM2,SOX10
hsa-miR-376a-2-5p	NR1H3	ligand-dependent nuclear receptor						0.0228	APOA1,APOC3,CDKN1B,SLC2A4,SREBF1
hsa-miR-376a-2-5p	SH3KBP1	other						0.0228	FN1,SERPINE1,SNAI1,TGFBR1,XBP1
hsa-miR-376a-2-5p	EFNA5	kinase						0.023	DCBLD2,DSC1,DUSP4,FOSL1,FOXD3,KLK7,KRT13,KRT18,KRT7,LPXN,NT5E,NTM
hsa-miR-376a-2-5p	MYOCD	transcription regulator						0.0239	CACNA1C,CACNA1D,CLSTN2,COL1A1,GJC1,HAND1,HCN4,KCNJ3,LMOD1,MEF2C,MYH11,MYL2,PDLIM3,TNNI1,TPM1
hsa-miR-376a-2-5p	mir-122	microrna						0.0246	ACTR1A,ARHGAP1,BCAT2,CREB1,GALNT10,GYS1,KHDRBS1,KIF5B,LAMC1,MTHFD2,PTPN1,PXN,RBM3,RIMS1,SEMA4D,SEPT2,SLC1A5,SLC7A1,TPD52L2,VAMP3,VAV3
hsa-miR-376a-2-5p	FOXP1	other						0.0253	NANOG,NR5A2,S1PR2,SFRP4,TDGF1,XBP1
hsa-miR-376a-2-5p	TREM1	transmembrane receptor						0.0256	ADORA2B,CASP5,CCR7,CD86,CENPU,CSF1,DUSP4,EGR2,F3,FABP3,FOSL1,GIPR,GREM1,HOMER1,HS3ST3B1,HSD3B7,IL6,LAMP3,MOAP1,NRIP3,NT5E,OASL,PHLDA1,PLCXD1,PLD1,RCAN1,RHOU,S1PR3,SFMBT2,SLAMF7,SLCO4A1,SNUPN,SYNJ2,THBD,TMEM158,TMPO,TNFSF14,WNT5A
hsa-miR-376a-2-5p	APOC3	transporter						0.0268	APOA1,APOC3
hsa-miR-376a-2-5p	CCNA2	other						0.0268	CDKN1A,CDKN1B
hsa-miR-376a-2-5p	CERS4	transcription regulator						0.0268	CERS2,CERS6
hsa-miR-376a-2-5p	CREB3L1	transcription regulator						0.0268	HSP90B1,HSPA5
hsa-miR-376a-2-5p	DUOX2	enzyme						0.0268	CDKN1A,TP53
hsa-miR-376a-2-5p	DUSP6	phosphatase						0.0268	ERCC1,ERCC4
hsa-miR-376a-2-5p	ELK4	transcription regulator						0.0268	FOSL1,INSIG2
hsa-miR-376a-2-5p	EXOC7	transporter						0.0268	SNAI1,ZEB2
hsa-miR-376a-2-5p	ING4	transcription regulator						0.0268	CDKN1A,IL6
hsa-miR-376a-2-5p	MAGEA11	other						0.0268	CDKN1B,FKBP5
hsa-miR-376a-2-5p	MAPKAP1	other						0.0268	HIF1A,PTEN
hsa-miR-376a-2-5p	PMEPA1	other						0.0268	AR,KLK3
hsa-miR-376a-2-5p	POMC	other						0.0268	LEP,POMC
hsa-miR-376a-2-5p	PPP1R13B	phosphatase						0.0268	CDKN1A,LATS2
hsa-miR-376a-2-5p	PRDM16	transcription regulator						0.0268	CDKN1A,SERPINE1
hsa-miR-376a-2-5p	PRKAA1	kinase						0.0268	IL6,TP53
hsa-miR-376a-2-5p	PSENEN	peptidase						0.0268	PSEN1,TP53
hsa-miR-376a-2-5p	RALA	enzyme						0.0268	CDKN1A,TP53
hsa-miR-376a-2-5p	S100B	other						0.0268	CDKN1A,TP53
hsa-miR-376a-2-5p	SFTPA2	other						0.0268	HSPA5,XBP1
hsa-miR-376a-2-5p	SPAG9	other						0.0268	CDKN1A,FOXK1
hsa-miR-376a-2-5p	SSH2	phosphatase						0.0268	SSH1,SSH3
hsa-miR-376a-2-5p	TOP3A	enzyme						0.0268	CDKN1A,TP53
hsa-miR-376a-2-5p	TSPYL2	other						0.0268	CDKN1A,TP53
hsa-miR-376a-2-5p	ZFYVE16	transporter						0.0268	CDKN1A,SERPINE1
hsa-miR-376a-2-5p	ZNF385B	other						0.0268	FAS,PERP
hsa-miR-376a-2-5p	UXT	transcription regulator						0.0276	CHEK1,F5,FKBP5,KDELR3,KLK3,KRT18,NCOR1,NFKBIA,PMEPA1,TLR3
hsa-miR-376a-2-5p	let-7	microrna						0.0276	AR,BMPR1A,BTG2,FN1,FOSL1,GAB2,ITGB3,LEF1,RDH10,TGFBR1
hsa-miR-376a-2-5p	miR-34a-5p (and other miRNAs w/seed GGCAGUG)	mature microrna						0.0276	CDKN1A,CREB1,DHFR,E2F2,IKBIP,MCM10,MET,NOTCH2,SOX2,TP53
hsa-miR-376a-2-5p	Lh	complex						0.0279	ACP2,ADCY9,AR,ARHGAP1,ARHGAP35,ARL4C,ARPC4,ATP9A,AXL,BAG1,BECN1,CD55,CDC42EP4,CDK14,CSNK1A1,DUSP3,FDX1,FKBP5,GBP1,GK,GNLY,IL6,KRT18,LHCGR,MAP1LC3B,MAP3K7,MAP4K4,NPC2,PDLIM3,PDXK,PHKA2,PI4K2A,PLPP1,PPFIA4,PRKAR2A,PTPN1,PTPN21,PTPRF,RAB5C,RGS4,SNAP23,TP53,TPM1,TPM2,VEGFC
hsa-miR-376a-2-5p	SMURF2	enzyme						0.0289	FN1,SERPINE1,SKIL,TGIF1
hsa-miR-376a-2-5p	NEUROG1	transcription regulator						0.0291	C1S,C3,CEMIP,FABP3,FN1,GAS2,GFPT2,GREM1,HAS2,IL6,ITGB3,LRIG1,PPIC,PXDN,TMTC2,TRIM22
hsa-miR-376a-2-5p	WISP2	growth factor						0.0308	ESR1,FN1,FOXA1,GATA3,HIF1A,KRT18,PROCR,SERPINE1,SMAD3,TGFBR1,XBP1
hsa-miR-376a-2-5p	HMGB1	transcription regulator						0.0322	AGER,CD40,CD58,CD86,CDKN1A,HIF1A,IFIT1,IL6
hsa-miR-376a-2-5p	REST	transcription regulator						0.0322	CDKN1B,GJD2,INA,KCNQ2,KCNQ3,NRP1,SNAP25,SYP
hsa-miR-376a-2-5p	EFNA3	kinase						0.0333	DCBLD2,DSC1,DUSP4,FOSL1,FOXD3,KLK7,KRT13,KRT18,KRT7,LPXN,NT5E,NTM
hsa-miR-376a-2-5p	EFNA4	kinase						0.0333	DCBLD2,DSC1,DUSP4,FOSL1,FOXD3,KLK7,KRT13,KRT18,KRT7,LPXN,NT5E,NTM
hsa-miR-376a-2-5p	CYBA	enzyme						0.0339	CDKN1A,FN1,SERPINE1
hsa-miR-376a-2-5p	JAG1	growth factor						0.0339	CD86,CDKN1A,TP53
hsa-miR-376a-2-5p	JINK1/2	group						0.0339	FOXO1,IL6,PTGES
hsa-miR-376a-2-5p	RASSF6	other						0.0339	BTG2,CDKN1A,TP53
hsa-miR-376a-2-5p	SIAH2	transcription regulator						0.0339	CHEK2,NCOR1,SIAH2
hsa-miR-376a-2-5p	SPRY2	other						0.0339	MET,PTEN,PTPN1
hsa-miR-376a-2-5p	URI1	transcription regulator						0.0339	CCNB1,FKBP5,KLK3
hsa-miR-376a-2-5p	WBSCR22	enzyme						0.0339	FKBP5,IL6,TSC22D3
hsa-miR-376a-2-5p	mir-221	microrna						0.0339	CDKN1B,KLK3,PIK3R1
hsa-miR-376a-2-5p	TRPC1	ion channel						0.0339	CDKN1A,CDKN1B,FOXO1,HIF1A,S1PR3
hsa-miR-376a-2-5p	ATF1	transcription regulator						0.035	CIITA,CREB1,CYP51A1,FOSL1,FTH1,TEAD1
hsa-miR-376a-2-5p	estrogen receptor	group						0.0367	ABCG1,AKT2,AKT3,AXL,C3,CALB2,CALD1,CD5,CD59,CDH13,CNNM1,COL4A1,CXCL12,DICER1,FGF12,FGF5,FN1,GATA3,GREB1,IL6,KLF10,KRT18,KRT7,LOXL2,MAN1A1,MMP17,MMP24,NT5E,PCDH19,PDGFD,SELL,SERPINE1,SMAD3,TGFBR1,TIMP2,TIMP3,TMEFF1,TP53,TSC22D3,VEGFC,WNT5A,WNT5B,XBP1
hsa-miR-376a-2-5p	miR-122-5p (miRNAs w/seed GGAGUGU)	mature microrna						0.0368	AKT3,ANK2,ANXA11,CLDN18,DUSP2,EGLN3,FOXP1,GALNT10,MECP2,NCAM1,NFATC2IP,SLC7A1,TPD52L2,TTYH3
hsa-miR-376a-2-5p	BCL6	transcription regulator						0.0379	ALCAM,CCR7,CD69,CD72,CDKN1A,CDKN2AIP,CHEK1,CIITA,COL1A1,FTH1,SERPINE1,SOX5,SOX6,TP53,XBP1
hsa-miR-376a-2-5p	ERBB2	kinase						0.0386	AR,BMP1,CADM1,CCNB1,CD59,CDC14B,CDCP1,CDKN1A,CDKN1B,CENPA,CHD6,CHDH,COL1A1,DHFR,E2F2,EPHB2,FN1,FOXA1,FOXO1,GART,GINS1,HIF1A,IL6,KDM5B,KLK3,KRT7,LIG3,MCM10,MCM2,MCM7,MXD3,PINK1,PMEPA1,POLA2,POLE4,POLR1B,POLR1D,POLR2J2/POLR2J3,PRIM1,PRIMA1,PRPS1,RAD51AP1,RAD51C,RALB,RFC2,RFC3,RPA1,RRM1,RRM2,SERPINE1,SMAD3,TGIF1,TOP2A,TP53,TPM1,VEGFC,WNT5B,XBP1
hsa-miR-376a-2-5p	FOXA1	transcription regulator						0.0396	ARHGEF9,CD58,DSCAM,EFHD1,FOXA1,FOXA3,FSTL1,GBP2,GLS,GREB1,HNF1B,KLK3,MALT1,PAM,PRDM15,PRNP,SIAH2,XBP1
hsa-miR-376a-2-5p	CCND1	transcription regulator						0.0402	AFAP1,AR,ARHGEF2,BCLAF1,C12orf76,CDKN1A,CDKN1B,DDIAS,EIF5,ENDOD1,FAM83D,GAS2L3,H2AFJ,HIST2H2BE,HJURP,HN1,ITGB3,LASP1,LCORL,MACF1,MAGI2,MCM7,MELK,MTMR1,MYO7A,MYT1,NT5E,PAH,PBLD,PDLIM3,RCN1,RHPN2,RPL27A,RPS6,RUFY3,SEC22A,SERINC3,STOM,THNSL1,TMEM204,TP53,TRAPPC2,VPS13D,ZNF423,ZNF610
hsa-miR-376a-2-5p	E2F6	transcription regulator						0.0413	CHEK2,DDX11,E2F2,EFNA5,MCM2,POLA2,RAD51AP1,RBBP4,RBBP8,RFX5,RRM2,RYR2,USP47
hsa-miR-376a-2-5p	IL5	cytokine						0.0413	ATXN1,CCR1,CD69,CIITA,CSF2RB,EGR2,GK,IL5RA,MS4A2,RBM3,SLC1A5,TPM4,XBP1
hsa-miR-376a-2-5p	EFNA1	other						0.0427	DCBLD2,DSC1,DUSP4,FOSL1,FOXI1,HERC6,KLK7,KRT13,KRT18,NT5E,NTM,PXN,TCF3,TRIM5
hsa-miR-376a-2-5p	SPDEF	transcription regulator						0.0436	CD40,CDKN1A,COL1A1,COL4A1,CYFIP1,HIF1A,KLK3,LAMC1,LASP1,LEF1,PRKCA,PTPRF,SERPINE1,SMAD3,WNT5A
hsa-miR-376a-2-5p	CHI3L1	enzyme						0.0441	ARL4C,CALD1,NNMT,PEG10,SERPINE1,TGIF2,TMEM158
hsa-miR-376a-2-5p	NUPR1	transcription regulator						0.0442	ADCY9,AEN,ANP32E,AP5M1,ARHGEF26,AS3MT,CACNA2D2,CAMK2N1,CASP2,CCDC77,CCNF,CENPI,CEP170B,CERK,CHMP1B,CHTF8,CTU1,CYB5B,DDX46,DHCR24,DIDO1,DSN1,ERCC6L,ERMP1,ETV6,FAM111A,FAM114A1,FAM120B,FCF1,FLVCR1,GAB2,GBP2,GCH1,GCNT2,GINS1,GK,HIST1H3C,HIST1H3E,HIST1H3F,HIVEP3,HJURP,HSPA2,ING2,ISCA1,JADE2,JOSD1,KBTBD7,LMAN2L,MAFG,MAN2B2,MCM10,MMS22L,MTFMT,NAA40,NAAA,NCKIPSD,NEMP1,NT5DC3,PHLDA1,PIK3R1,PLEKHM3,PMPCA,…
hsa-miR-376a-2-5p	SP1	transcription regulator						0.0446	AR,B4GALT5,BMP4,CD59,CDKN1A,CDKN1B,CHRNA5,CHRNB4,CIITA,COL1A1,CTH,CYP51A1,DLC1,EDA,ENG,ESR1,F2R,FES,FN1,FOSL1,GLTP,HAS2,HIF1A,HINT1,HPSE,HSPA5,INSR,KCNQ2,KCNQ3,KRT18,LDLR,LHCGR,MAOA,MAT2B,MET,MIER1,NOS3,PADI4,PRKCA,PROCR,SLC2A1,SLC2A12,SMAD3,TEAD1,TGFBR1,TIMP2,TLR2,TNFSF14,TP53,TP73,TXNRD1,WNT9A,ZEB2
hsa-miR-376a-2-5p	RLIM	enzyme						0.0454	CDKN1A,FN1,SERPINE1,SKIL
hsa-miR-376a-2-5p	SPARC	other						0.0454	IL6,NOTCH2,SERPINE1,SNAI1
hsa-miR-376a-2-5p	TOP1	enzyme						0.0454	CDKN1A,HIF1A,MECP2,TP53
hsa-miR-376a-2-5p	ATM	kinase						0.0459	CDKN1A,CDKN1B,FN1,IL6,LPIN1,MICA,RRM2,SERPINE1,TP53
hsa-miR-376a-2-5p	LDL	complex						0.0465	C3,ECE1,FABP4,HSP90B1,HSPA5,NOS3,OLR1,SERPINE1,SMAD3,SREBF1,TP53,XBP1
hsa-miR-376a-2-5p	STOX1	other						0.0479	AHCY,CALM1 (includes others),FANK1,PSMF1,RAB10
hsa-miR-376a-2-5p	mir-515	microrna						0.0479	AR,ERCC8,HIF1A,IL6,SERPINE1
hsa-miR-376a-2-5p	ANLN	other						0.0481	AEN,BTG2,CDKN1A,CMBL,FAM196A,GAL3ST4,PDE2A,PSTPIP2,STOM,TCEA3,TIGAR,TNFRSF10A,VWCE
hsa-miR-376a-2-5p	AURK	group						0.0481	AEN,BTG2,CDKN1A,CMBL,FAM196A,GAL3ST4,PDE2A,PSTPIP2,STOM,TCEA3,TIGAR,TNFRSF10A,VWCE
hsa-miR-376a-2-5p	P38 MAPK	group						0.0483	AGER,ANXA5,CCL8,CCNF,CCR7,CD40,CD55,CD86,CDKN1A,CXCL12,EGR2,FABP4,FAS,FN1,GBP1,IL6,ITGB3,KDELR1,KDELR3,MAP4K4,MSH2,MYH11,PPM1D,RCAN1,SERPINE1,SNAI1,SP7,TLR2,TOP2A,TP53,TRADD,VDR
hsa-miR-376a-2-5p	BMI1	transcription regulator						0.0496	CADM1,CDKN1B,DLC1,HOXB9,KIF1B,MET,MYT1,SMAD3,ST18,TP53
Causal Networks
Diseases and Bio Functions
Categories	Functions	Diseases or Functions Annotation	p-Value	Predicted Activation State	Activation z-score	Notes	Bias-corrected z-score	Molecules	# Molecules
Cancer, Organismal Injury and Abnormalities	adenocarcinoma	adenocarcinoma	1.28e-17					PPP2R5E,PAOX,RNF219,SUPT3H,RIC8A,CCL8,NTSR1,CERCAM,RTN2,TESPA1,NDE1,TTC29,FAM104B,AMER3,SORL1,MTO1,YIPF1,CDRT1,C1orf106,TOP2A,S100A7A,CPPED1,AMFR,TM2D3,KCNJ4,SAMD9L,FAM105A,GNLY,WHAMM,TMEM239,TMCC3,TTC28,KIAA0355,NUDT1,RASGRF1,PLA2G4E,MRGPRF,ASB12,INHBE,PPP2R3A,TMUB2,C16orf45,AGK,C19orf44,SCML4,HIC2,NLRP10,GTF2F1,CCDC40,ZNF280D,DCN,CDH13,ZNF154,FCF1,UBR1,HOXD12,BAG1,ZBTB17,MXD3,TM9SF4,SKIDA1,PCNX…	2342
Cancer, Organismal Injury and Abnormalities	tumorigenesis	tumorigenesis of tissue	1.76e-14					PPP2R5E,PAOX,RNF219,SUPT3H,RIC8A,CCL8,NTSR1,CERCAM,RTN2,TESPA1,NDE1,TTC29,FAM104B,AMER3,SORL1,MTO1,YIPF1,CDRT1,C1orf106,TOP2A,S100A7A,CPPED1,AMFR,TM2D3,KCNJ4,SAMD9L,FAM105A,GNLY,WHAMM,TMEM239,TMCC3,TTC28,KIAA0355,NUDT1,RASGRF1,PLA2G4E,MRGPRF,XPNPEP2,ASB12,INHBE,PPP2R3A,TMUB2,C16orf45,AGK,C19orf44,SCML4,HIC2,NLRP10,GTF2F1,CCDC40,ZNF280D,DCN,CDH13,ZNF154,VMA21,FCF1,UBR1,HOXD12,BAG1,ZBTB17,SLC30A10,…	2623
Cancer, Gastrointestinal Disease, Organismal Injury and Abnormalities	large intestine adenocarcinoma	large intestine adenocarcinoma	3.36e-14					PPP2R5E,PAOX,RNF219,SUPT3H,CCL8,NTSR1,RTN2,TESPA1,TTC29,FAM104B,AMER3,SORL1,MTO1,C1orf106,TOP2A,CPPED1,TM2D3,KCNJ4,SAMD9L,TMEM239,TMCC3,TTC28,KIAA0355,NUDT1,RASGRF1,PLA2G4E,MRGPRF,INHBE,PPP2R3A,TMUB2,C16orf45,C19orf44,SCML4,HIC2,NLRP10,GTF2F1,CCDC40,ZNF280D,DCN,CDH13,ZNF154,FCF1,UBR1,HOXD12,BAG1,ZBTB17,MXD3,TM9SF4,SKIDA1,PCNX4,TRIM56,FAM46A,MASP1,RASD2,GSDMB,SLC47A1,NEBL,MIER1,NT5DC2,C11orf57,STO…	1866
Cancer, Organismal Injury and Abnormalities	neoplasia	neoplasia of epithelial tissue	4.67e-14					PPP2R5E,PAOX,RNF219,SUPT3H,RIC8A,CCL8,NTSR1,CERCAM,RTN2,TESPA1,NDE1,TTC29,FAM104B,AMER3,SORL1,MTO1,YIPF1,CDRT1,C1orf106,TOP2A,S100A7A,CPPED1,AMFR,TM2D3,KCNJ4,SAMD9L,FAM105A,GNLY,WHAMM,TMEM239,TMCC3,TTC28,KIAA0355,NUDT1,RASGRF1,PLA2G4E,MRGPRF,ASB12,INHBE,PPP2R3A,TMUB2,C16orf45,AGK,C19orf44,SCML4,HIC2,NLRP10,GTF2F1,CCDC40,ZNF280D,DCN,CDH13,ZNF154,VMA21,FCF1,UBR1,HOXD12,BAG1,ZBTB17,SLC30A10,MXD3,TM9…	2596
Cancer, Gastrointestinal Disease, Organismal Injury and Abnormalities	large intestine carcinoma	large intestine carcinoma	1.01e-13					PPP2R5E,PAOX,RNF219,SUPT3H,CCL8,NTSR1,RTN2,TESPA1,TTC29,FAM104B,AMER3,SORL1,MTO1,C1orf106,TOP2A,CPPED1,TM2D3,KCNJ4,SAMD9L,TMEM239,TMCC3,TTC28,KIAA0355,NUDT1,RASGRF1,PLA2G4E,MRGPRF,INHBE,PPP2R3A,TMUB2,C16orf45,C19orf44,SCML4,HIC2,NLRP10,GTF2F1,CCDC40,ZNF280D,DCN,CDH13,ZNF154,FCF1,UBR1,HOXD12,BAG1,ZBTB17,MXD3,TM9SF4,SKIDA1,PCNX4,TRIM56,FAM46A,MASP1,RASD2,GSDMB,SLC47A1,NEBL,MIER1,NT5DC2,C11orf57,STO…	1878
Cancer, Organismal Injury and Abnormalities	epithelial cancer	carcinoma	1.08e-13					PPP2R5E,PAOX,RNF219,SUPT3H,RIC8A,CCL8,NTSR1,CERCAM,RTN2,TESPA1,NDE1,TTC29,FAM104B,AMER3,SORL1,MTO1,YIPF1,CDRT1,C1orf106,TOP2A,S100A7A,CPPED1,AMFR,TM2D3,KCNJ4,SAMD9L,FAM105A,GNLY,WHAMM,TMEM239,TMCC3,TTC28,KIAA0355,NUDT1,RASGRF1,PLA2G4E,MRGPRF,ASB12,INHBE,PPP2R3A,TMUB2,C16orf45,AGK,C19orf44,SCML4,HIC2,NLRP10,GTF2F1,CCDC40,ZNF280D,DCN,CDH13,ZNF154,VMA21,FCF1,UBR1,HOXD12,BAG1,ZBTB17,MXD3,TM9SF4,SKIDA…	2585
Cancer, Gastrointestinal Disease, Organismal Injury and Abnormalities	intestinal carcinoma	intestinal carcinoma	1.28e-13					PPP2R5E,PAOX,RNF219,SUPT3H,CCL8,NTSR1,RTN2,TESPA1,TTC29,FAM104B,AMER3,SORL1,MTO1,C1orf106,TOP2A,CPPED1,TM2D3,KCNJ4,SAMD9L,TMEM239,TMCC3,TTC28,KIAA0355,NUDT1,RASGRF1,PLA2G4E,MRGPRF,INHBE,PPP2R3A,TMUB2,C16orf45,C19orf44,SCML4,HIC2,NLRP10,GTF2F1,CCDC40,ZNF280D,DCN,CDH13,ZNF154,FCF1,UBR1,HOXD12,BAG1,ZBTB17,MXD3,TM9SF4,SKIDA1,PCNX4,TRIM56,FAM46A,MASP1,RASD2,GSDMB,SLC47A1,NEBL,MIER1,NT5DC2,C11orf57,STO…	1881
Cancer, Organismal Injury and Abnormalities	abdominal neoplasm	abdominal neoplasm	1.43e-12					PPP2R5E,PAOX,RNF219,SUPT3H,RIC8A,CCL8,NTSR1,CERCAM,RTN2,TESPA1,NDE1,TTC29,FAM104B,AMER3,SORL1,MTO1,YIPF1,CDRT1,C1orf106,TOP2A,CPPED1,AMFR,TM2D3,KCNJ4,SAMD9L,FAM105A,GNLY,TMEM239,TMCC3,TTC28,KIAA0355,NUDT1,RASGRF1,PLA2G4E,MRGPRF,ASB12,TPM4,INHBE,PPP2R3A,TMUB2,C16orf45,AGK,C19orf44,SCML4,HIC2,NLRP10,GTF2F1,CCDC40,ZNF280D,DCN,CDH13,ZNF154,VMA21,FCF1,UBR1,HOXD12,BAG1,ZBTB17,SLC30A10,MXD3,TM9SF4,SKIDA…	2572
Cancer, Organismal Injury and Abnormalities	non-melanoma solid tumor	non-melanoma solid tumor	1.74e-12					PPP2R5E,PAOX,RNF219,SUPT3H,RIC8A,CCL8,NTSR1,CERCAM,RTN2,TESPA1,NDE1,TTC29,FAM104B,AMER3,SORL1,MTO1,YIPF1,CDRT1,C1orf106,TOP2A,S100A7A,CPPED1,AMFR,TM2D3,KCNJ4,SAMD9L,FAM105A,GNLY,WHAMM,TMEM239,TMCC3,TTC28,KIAA0355,NUDT1,RASGRF1,PLA2G4E,MRGPRF,ASB12,INHBE,PPP2R3A,TMUB2,C16orf45,AGK,C19orf44,SCML4,HIC2,NLRP10,GTF2F1,CCDC40,ZNF280D,DCN,CDH13,ZNF154,VMA21,FCF1,UBR1,HOXD12,BAG1,ZBTB17,SLC30A10,MXD3,TM9…	2629
Cancer, Organismal Injury and Abnormalities	cancer	cancer	2.52e-12					PPP2R5E,PAOX,RNF219,SUPT3H,RIC8A,CCL8,NTSR1,CERCAM,RTN2,TESPA1,NDE1,TTC29,FAM104B,AMER3,SORL1,MTO1,YIPF1,CDRT1,C1orf106,TOP2A,S100A7A,CPPED1,RSRC2,AMFR,TM2D3,KCNJ4,SDR16C5,SAMD9L,FAM105A,GNLY,WHAMM,TMEM239,TMEM189,TMCC3,TTC28,KIAA0355,NUDT1,RASGRF1,PLA2G4E,MRGPRF,XPNPEP2,ASB12,TPM4,PRM1,INHBE,PPP2R3A,TMUB2,C16orf45,AGK,C19orf44,SCML4,HIC2,NLRP10,GTF2F1,CCDC40,ZNF280D,DCN,NANOG,CDH13,ZNF154,MS4A3,…	2836
Cancer, Organismal Injury and Abnormalities	malignant solid tumor	malignant solid tumor	4.41e-12					PPP2R5E,PAOX,RNF219,SUPT3H,RIC8A,CCL8,NTSR1,CERCAM,RTN2,TESPA1,NDE1,TTC29,FAM104B,AMER3,SORL1,MTO1,YIPF1,CDRT1,C1orf106,TOP2A,S100A7A,CPPED1,RSRC2,AMFR,TM2D3,KCNJ4,SDR16C5,SAMD9L,FAM105A,GNLY,WHAMM,TMEM239,TMEM189,TMCC3,TTC28,KIAA0355,NUDT1,RASGRF1,PLA2G4E,MRGPRF,XPNPEP2,ASB12,TPM4,PRM1,INHBE,PPP2R3A,TMUB2,C16orf45,AGK,C19orf44,SCML4,HIC2,NLRP10,GTF2F1,CCDC40,ZNF280D,DCN,NANOG,CDH13,ZNF154,MS4A3,…	2817
Cancer, Organismal Injury and Abnormalities	abdominal cancer	abdominal cancer	5.4e-12					PPP2R5E,PAOX,RNF219,SUPT3H,RIC8A,CCL8,NTSR1,CERCAM,RTN2,TESPA1,NDE1,TTC29,FAM104B,AMER3,SORL1,MTO1,YIPF1,CDRT1,C1orf106,TOP2A,CPPED1,AMFR,TM2D3,KCNJ4,SAMD9L,FAM105A,GNLY,TMEM239,TMCC3,TTC28,KIAA0355,NUDT1,RASGRF1,PLA2G4E,MRGPRF,ASB12,TPM4,INHBE,PPP2R3A,TMUB2,C16orf45,AGK,C19orf44,SCML4,HIC2,NLRP10,GTF2F1,CCDC40,ZNF280D,DCN,CDH13,ZNF154,VMA21,FCF1,UBR1,HOXD12,BAG1,ZBTB17,MXD3,TM9SF4,SKIDA1,PCNX4,T…	2543
Cancer, Organismal Injury and Abnormalities	solid tumor	solid tumor	6e-12					PPP2R5E,PAOX,RNF219,SUPT3H,RIC8A,CCL8,NTSR1,CERCAM,RTN2,TESPA1,NDE1,TTC29,FAM104B,AMER3,SORL1,MTO1,YIPF1,CDRT1,C1orf106,TOP2A,S100A7A,CPPED1,RSRC2,AMFR,TM2D3,KCNJ4,SDR16C5,SAMD9L,FAM105A,GNLY,WHAMM,TMEM239,TMEM189,TMCC3,TTC28,KIAA0355,NUDT1,RASGRF1,PLA2G4E,MRGPRF,XPNPEP2,ASB12,TPM4,PRM1,INHBE,PPP2R3A,TMUB2,C16orf45,AGK,C19orf44,SCML4,HIC2,NLRP10,GTF2F1,CCDC40,ZNF280D,DCN,NANOG,CDH13,ZNF154,MS4A3,…	2837
Cancer, Organismal Injury and Abnormalities	abdominal adenocarcinoma	abdominal adenocarcinoma	9.86e-12					PPP2R5E,PAOX,RNF219,RIC8A,NTSR1,CERCAM,RTN2,TESPA1,NDE1,TTC29,AMER3,SORL1,YIPF1,CDRT1,C1orf106,TOP2A,AMFR,TM2D3,KCNJ4,SAMD9L,FAM105A,GNLY,TMEM239,TMCC3,TTC28,KIAA0355,RASGRF1,PLA2G4E,MRGPRF,ASB12,TMUB2,AGK,C19orf44,HIC2,NLRP10,GTF2F1,CCDC40,ZNF280D,DCN,CDH13,ZNF154,HOXD12,BAG1,ZBTB17,MXD3,TM9SF4,SKIDA1,TRIM56,FAM46A,MASP1,RASD2,SLC47A1,NEBL,NR6A1,ZNF790,C11orf57,STOX2,LMOD3,SKA3,SLC16A3,CECR1,TME…	1903
Cancer, Gastrointestinal Disease, Organismal Injury and Abnormalities	gastrointestinal carcinoma	gastrointestinal carcinoma	3.23e-11					PPP2R5E,PAOX,RNF219,SUPT3H,CCL8,NTSR1,RTN2,TESPA1,TTC29,FAM104B,AMER3,SORL1,MTO1,YIPF1,C1orf106,TOP2A,S100A7A,CPPED1,TM2D3,KCNJ4,SAMD9L,WHAMM,TMEM239,TMCC3,TTC28,KIAA0355,NUDT1,RASGRF1,PLA2G4E,MRGPRF,INHBE,PPP2R3A,TMUB2,C16orf45,C19orf44,SCML4,HIC2,NLRP10,GTF2F1,CCDC40,ZNF280D,DCN,CDH13,ZNF154,FCF1,UBR1,HOXD12,BAG1,ZBTB17,MXD3,TM9SF4,SKIDA1,PCNX4,TRIM56,FAM46A,MASP1,RASD2,GSDMB,SLC47A1,NEBL,MIER1…	1959
Cancer, Organismal Injury and Abnormalities	abdominal carcinoma	abdominal carcinoma	2.21e-10					PPP2R5E,PAOX,RNF219,RIC8A,NTSR1,CERCAM,RTN2,TESPA1,NDE1,TTC29,AMER3,SORL1,YIPF1,CDRT1,C1orf106,TOP2A,AMFR,TM2D3,KCNJ4,SAMD9L,FAM105A,GNLY,TMEM239,TMCC3,TTC28,KIAA0355,RASGRF1,PLA2G4E,MRGPRF,ASB12,TMUB2,AGK,C19orf44,HIC2,NLRP10,GTF2F1,CCDC40,ZNF280D,DCN,CDH13,ZNF154,HOXD12,BAG1,ZBTB17,MXD3,TM9SF4,SKIDA1,TRIM56,FAM46A,MASP1,RASD2,SLC47A1,NEBL,NR6A1,ZNF790,C11orf57,STOX2,LMOD3,SKA3,SLC16A3,CECR1,TME…	1913
Cancer, Gastrointestinal Disease, Organismal Injury and Abnormalities	digestive organ tumor	digestive organ tumor	4.23e-10					PPP2R5E,PAOX,RNF219,SUPT3H,RIC8A,CCL8,NTSR1,RTN2,TESPA1,NDE1,TTC29,FAM104B,AMER3,SORL1,MTO1,YIPF1,CDRT1,C1orf106,TOP2A,S100A7A,CPPED1,AMFR,TM2D3,KCNJ4,SAMD9L,WHAMM,TMEM239,TMCC3,TTC28,KIAA0355,NUDT1,RASGRF1,PLA2G4E,MRGPRF,ASB12,INHBE,PPP2R3A,TMUB2,C16orf45,AGK,C19orf44,SCML4,HIC2,NLRP10,GTF2F1,CCDC40,ZNF280D,DCN,CDH13,ZNF154,VMA21,FCF1,UBR1,HOXD12,BAG1,ZBTB17,SLC30A10,MXD3,TM9SF4,SKIDA1,PCNX4,TRI…	2394
Cancer, Gastrointestinal Disease, Organismal Injury and Abnormalities	digestive system cancer	digestive system cancer	1.81e-09					PPP2R5E,PAOX,RNF219,SUPT3H,RIC8A,CCL8,NTSR1,RTN2,TESPA1,NDE1,TTC29,FAM104B,AMER3,SORL1,MTO1,YIPF1,CDRT1,C1orf106,TOP2A,S100A7A,CPPED1,AMFR,TM2D3,KCNJ4,SAMD9L,WHAMM,TMEM239,TMCC3,TTC28,KIAA0355,NUDT1,RASGRF1,PLA2G4E,MRGPRF,ASB12,INHBE,PPP2R3A,TMUB2,C16orf45,AGK,C19orf44,SCML4,HIC2,NLRP10,GTF2F1,CCDC40,ZNF280D,DCN,CDH13,ZNF154,VMA21,FCF1,UBR1,HOXD12,BAG1,ZBTB17,MXD3,TM9SF4,SKIDA1,PCNX4,TRIM56,FAM46…	2365
Cancer, Organismal Injury and Abnormalities	tumorigenesis	tumorigenesis of epithelial neoplasm	2.99e-09					PPP2R5E,RIC8A,NTSR1,CERCAM,RTN2,TESPA1,TTC29,AMER3,SORL1,YIPF1,CDRT1,C1orf106,TOP2A,TM2D3,KCNJ4,SAMD9L,FAM105A,GNLY,TMEM239,TMCC3,TTC28,KIAA0355,RASGRF1,PLA2G4E,MRGPRF,ASB12,TMUB2,AGK,HIC2,NLRP10,GTF2F1,CCDC40,ZNF280D,DCN,CDH13,ZNF154,HOXD12,BAG1,ZBTB17,SLC30A10,MXD3,TM9SF4,SKIDA1,FAM46A,MASP1,RASD2,SLC47A1,NEBL,NR6A1,ZNF790,C11orf57,STOX2,LMOD3,SKA3,MYEF2,CECR1,TMEM127,ABCC6,PTPN21,C10orf76,TMTC…	1769
Cancer, Gastrointestinal Disease, Organismal Injury and Abnormalities	intestinal tumor	intestinal tumor	5.72e-09					PPP2R5E,PAOX,RNF219,SUPT3H,CCL8,NTSR1,RTN2,TESPA1,TTC29,FAM104B,AMER3,SORL1,MTO1,C1orf106,TOP2A,CPPED1,TM2D3,KCNJ4,SAMD9L,TMEM239,TMCC3,TTC28,KIAA0355,NUDT1,RASGRF1,PLA2G4E,MRGPRF,INHBE,PPP2R3A,TMUB2,C16orf45,C19orf44,SCML4,HIC2,NLRP10,GTF2F1,CCDC40,ZNF280D,DCN,CDH13,ZNF154,FCF1,UBR1,HOXD12,BAG1,ZBTB17,SLC30A10,MXD3,TM9SF4,SKIDA1,PCNX4,TRIM56,FAM46A,MASP1,RASD2,GSDMB,SLC47A1,NEBL,MIER1,NT5DC2,C11…	1963
Cancer, Gastrointestinal Disease, Organismal Injury and Abnormalities	large intestine neoplasm	large intestine neoplasm	6.11e-09					PPP2R5E,PAOX,RNF219,SUPT3H,CCL8,NTSR1,RTN2,TESPA1,TTC29,FAM104B,AMER3,SORL1,MTO1,C1orf106,TOP2A,CPPED1,TM2D3,KCNJ4,SAMD9L,TMEM239,TMCC3,TTC28,KIAA0355,NUDT1,RASGRF1,PLA2G4E,MRGPRF,INHBE,PPP2R3A,TMUB2,C16orf45,C19orf44,SCML4,HIC2,NLRP10,GTF2F1,CCDC40,ZNF280D,DCN,CDH13,ZNF154,FCF1,UBR1,HOXD12,BAG1,ZBTB17,SLC30A10,MXD3,TM9SF4,SKIDA1,PCNX4,TRIM56,FAM46A,MASP1,RASD2,GSDMB,SLC47A1,NEBL,MIER1,NT5DC2,C11…	1955
Cancer, Organismal Injury and Abnormalities	tumorigenesis	tumorigenesis of carcinoma	9.43e-09					PPP2R5E,RIC8A,NTSR1,CERCAM,RTN2,TESPA1,TTC29,AMER3,SORL1,YIPF1,CDRT1,C1orf106,TOP2A,TM2D3,KCNJ4,SAMD9L,FAM105A,GNLY,TMEM239,TMCC3,TTC28,KIAA0355,RASGRF1,PLA2G4E,MRGPRF,ASB12,TMUB2,AGK,HIC2,NLRP10,GTF2F1,CCDC40,ZNF280D,DCN,CDH13,ZNF154,HOXD12,BAG1,ZBTB17,MXD3,TM9SF4,SKIDA1,FAM46A,MASP1,RASD2,SLC47A1,NR6A1,ZNF790,C11orf57,STOX2,LMOD3,SKA3,MYEF2,CECR1,TMEM127,ABCC6,PTPN21,C10orf76,TMTC1,KANK3,SLX4IP…	1746
Cancer, Gastrointestinal Disease, Organismal Injury and Abnormalities	malignant neoplasm of large intestine	malignant neoplasm of large intestine	1.06e-08					PPP2R5E,PAOX,RNF219,SUPT3H,CCL8,NTSR1,RTN2,TESPA1,TTC29,FAM104B,AMER3,SORL1,MTO1,C1orf106,TOP2A,CPPED1,TM2D3,KCNJ4,SAMD9L,TMEM239,TMCC3,TTC28,KIAA0355,NUDT1,RASGRF1,PLA2G4E,MRGPRF,INHBE,PPP2R3A,TMUB2,C16orf45,C19orf44,SCML4,HIC2,NLRP10,GTF2F1,CCDC40,ZNF280D,DCN,CDH13,ZNF154,FCF1,UBR1,HOXD12,BAG1,ZBTB17,MXD3,TM9SF4,SKIDA1,PCNX4,TRIM56,FAM46A,MASP1,RASD2,GSDMB,SLC47A1,NEBL,MIER1,NT5DC2,C11orf57,STO…	1943
Cancer, Gastrointestinal Disease, Organismal Injury and Abnormalities	intestinal cancer	intestinal cancer	1.37e-08					PPP2R5E,PAOX,RNF219,SUPT3H,CCL8,NTSR1,RTN2,TESPA1,TTC29,FAM104B,AMER3,SORL1,MTO1,C1orf106,TOP2A,CPPED1,TM2D3,KCNJ4,SAMD9L,TMEM239,TMCC3,TTC28,KIAA0355,NUDT1,RASGRF1,PLA2G4E,MRGPRF,INHBE,PPP2R3A,TMUB2,C16orf45,C19orf44,SCML4,HIC2,NLRP10,GTF2F1,CCDC40,ZNF280D,DCN,CDH13,ZNF154,FCF1,UBR1,HOXD12,BAG1,ZBTB17,MXD3,TM9SF4,SKIDA1,PCNX4,TRIM56,FAM46A,MASP1,RASD2,GSDMB,SLC47A1,NEBL,MIER1,NT5DC2,C11orf57,STO…	1949
Cancer, Gastrointestinal Disease, Organismal Injury and Abnormalities	neoplasia	gastrointestinal neoplasia	1.7e-08					PPP2R5E,PAOX,RNF219,SUPT3H,RIC8A,CCL8,NTSR1,RTN2,TESPA1,TTC29,FAM104B,AMER3,SORL1,MTO1,YIPF1,C1orf106,TOP2A,S100A7A,CPPED1,TM2D3,KCNJ4,SAMD9L,WHAMM,TMEM239,TMCC3,TTC28,KIAA0355,NUDT1,RASGRF1,PLA2G4E,MRGPRF,INHBE,PPP2R3A,TMUB2,C16orf45,C19orf44,SCML4,HIC2,NLRP10,GTF2F1,CCDC40,ZNF280D,DCN,CDH13,ZNF154,FCF1,UBR1,HOXD12,BAG1,ZBTB17,SLC30A10,MXD3,TM9SF4,SKIDA1,PCNX4,TRIM56,FAM46A,MASP1,RASD2,GSDMB,SLC…	2060
Cancer, Organismal Injury and Abnormalities	tumorigenesis	tumorigenesis of malignant tumor	4.84e-08					PPP2R5E,RIC8A,NTSR1,CERCAM,RTN2,TESPA1,TTC29,AMER3,SORL1,YIPF1,CDRT1,C1orf106,TOP2A,TM2D3,KCNJ4,SAMD9L,FAM105A,GNLY,TMEM239,TMCC3,TTC28,KIAA0355,RASGRF1,PLA2G4E,MRGPRF,ASB12,TMUB2,AGK,HIC2,NLRP10,GTF2F1,CCDC40,ZNF280D,DCN,CDH13,ZNF154,HOXD12,BAG1,ZBTB17,MXD3,TM9SF4,SKIDA1,FAM46A,MASP1,RASD2,SLC47A1,NR6A1,ZNF790,C11orf57,STOX2,LMOD3,SKA3,MYEF2,CECR1,TMEM127,ABCC6,PTPN21,C10orf76,TMTC1,KANK3,SLX4IP…	1753
Cancer, Gastrointestinal Disease, Organismal Injury and Abnormalities	gastrointestinal tract cancer	gastrointestinal tract cancer	8.1e-08					PPP2R5E,PAOX,RNF219,SUPT3H,CCL8,NTSR1,RTN2,TESPA1,TTC29,FAM104B,AMER3,SORL1,MTO1,YIPF1,C1orf106,TOP2A,S100A7A,CPPED1,TM2D3,KCNJ4,SAMD9L,WHAMM,TMEM239,TMCC3,TTC28,KIAA0355,NUDT1,RASGRF1,PLA2G4E,MRGPRF,INHBE,PPP2R3A,TMUB2,C16orf45,C19orf44,SCML4,HIC2,NLRP10,GTF2F1,CCDC40,ZNF280D,DCN,CDH13,ZNF154,FCF1,UBR1,HOXD12,BAG1,ZBTB17,MXD3,TM9SF4,SKIDA1,PCNX4,TRIM56,FAM46A,MASP1,RASD2,GSDMB,SLC47A1,NEBL,MIER1…	2028
Cancer, Gastrointestinal Disease, Organismal Injury and Abnormalities	tumorigenesis	tumorigenesis of digestive organ tumor	2.91e-06					GTF2B,PPP2R5E,KIAA1217,NTSR1,TMEM43,RTN2,TESPA1,TTC29,USP6NL,AMER3,SORL1,LUZP2,YIPF1,TOP2A,SEMA5B,TM2D3,ASAP2,KCNJ4,SAMD9L,GPR83,DENND2A,TCERG1L,TMEM239,SLC35D2,TTC28,TMEM97,KIAA0355,RASGRF1,PLA2G4E,MRGPRF,CTCFL,MESP1,HIC2,NLRP10,GTF2F1,CCDC40,ALDH1L2,ZNF280D,ATXN7,CDH13,AMOT,ZNF154,CD3G,PSTPIP2,HOXD12,BAG1,ZBTB17,ARMC5,MXD3,TM9SF4,SKIDA1,NPLOC4,B4GALT7,FAM46A,MASP1,RASD2,SH3RF2,LONRF2,ZMYM4,PRRG…	1264
Cancer, Gastrointestinal Disease, Organismal Injury and Abnormalities	colon adenocarcinoma	colon adenocarcinoma	5.74e-06					GTF2B,PPP2R5E,NTSR1,TMEM43,RTN2,TTC29,USP6NL,AMER3,TOP2A,SEMA5B,ASAP2,KCNJ4,SAMD9L,GPR83,DENND2A,TCERG1L,SLC35D2,TTC28,TMEM97,KIAA0355,RASGRF1,PLA2G4E,MRGPRF,CTCFL,MESP1,HIC2,NLRP10,CCDC40,ALDH1L2,ZNF280D,ATXN7,CDH13,AMOT,ZNF154,CD3G,PSTPIP2,HOXD12,BAG1,ZBTB17,ARMC5,MXD3,TM9SF4,SKIDA1,NPLOC4,FAM46A,MASP1,RASD2,SH3RF2,LONRF2,ZMYM4,PRRG3,C11orf57,STOX2,LMOD3,IPO11,TOMM22,CECR1,PTPN18,CES3,GGCX,C14o…	1087
Cancer, Gastrointestinal Disease, Organismal Injury and Abnormalities	gastrointestinal adenocarcinoma	gastrointestinal adenocarcinoma	6.29e-06					GTF2B,PPP2R5E,RNF219,KIAA1217,NTSR1,TMEM43,RTN2,TESPA1,TTC29,USP6NL,AMER3,SORL1,LUZP2,YIPF1,TOP2A,SEMA5B,S100A7A,TM2D3,ASAP2,KCNJ4,SAMD9L,RPS6KC1,GPR83,DENND2A,WHAMM,TCERG1L,TMEM239,SLC35D2,TTC28,TMEM97,KIAA0355,RASGRF1,PLA2G4E,MRGPRF,CTCFL,MESP1,HIC2,NLRP10,GTF2F1,CCDC40,ALDH1L2,ZNF280D,ATXN7,CDH13,AMOT,ZNF154,CD3G,PSTPIP2,HOXD12,BAG1,ZBTB17,ARMC5,MXD3,TM9SF4,SKIDA1,NPLOC4,B4GALT7,FAM46A,MASP1,R…	1270
Cancer, Gastrointestinal Disease, Organismal Injury and Abnormalities	tumorigenesis	tumorigenesis of colorectal tumor	7e-06					GTF2B,PPP2R5E,NTSR1,TMEM43,RTN2,TTC29,USP6NL,AMER3,SORL1,LUZP2,TOP2A,SEMA5B,ASAP2,KCNJ4,SAMD9L,GPR83,DENND2A,TCERG1L,TMEM239,SLC35D2,TTC28,TMEM97,KIAA0355,RASGRF1,PLA2G4E,MRGPRF,CTCFL,MESP1,HIC2,NLRP10,GTF2F1,CCDC40,ALDH1L2,ZNF280D,ATXN7,CDH13,AMOT,ZNF154,CD3G,PSTPIP2,HOXD12,BAG1,ZBTB17,ARMC5,MXD3,TM9SF4,SKIDA1,NPLOC4,FAM46A,MASP1,RASD2,SH3RF2,LONRF2,ZMYM4,PRRG3,C11orf57,STOX2,LMOD3,IPO11,TOMM22,…	1149
Cancer, Gastrointestinal Disease, Organismal Injury and Abnormalities	colorectal adenocarcinoma	colorectal adenocarcinoma	7.45e-06					GTF2B,PPP2R5E,NTSR1,TMEM43,RTN2,TTC29,USP6NL,AMER3,SORL1,LUZP2,TOP2A,SEMA5B,ASAP2,KCNJ4,SAMD9L,GPR83,DENND2A,TCERG1L,TMEM239,SLC35D2,TTC28,TMEM97,KIAA0355,RASGRF1,PLA2G4E,MRGPRF,CTCFL,MESP1,HIC2,NLRP10,GTF2F1,CCDC40,ALDH1L2,ZNF280D,ATXN7,CDH13,AMOT,ZNF154,CD3G,PSTPIP2,HOXD12,BAG1,ZBTB17,ARMC5,MXD3,TM9SF4,SKIDA1,NPLOC4,FAM46A,MASP1,RASD2,SH3RF2,LONRF2,ZMYM4,PRRG3,C11orf57,STOX2,LMOD3,IPO11,TOMM22,…	1124
Cancer, Gastrointestinal Disease, Organismal Injury and Abnormalities	colorectal carcinoma	colorectal carcinoma	7.93e-06					GTF2B,PPP2R5E,NTSR1,TMEM43,RTN2,TTC29,USP6NL,AMER3,SORL1,LUZP2,TOP2A,SEMA5B,ASAP2,KCNJ4,SAMD9L,GPR83,DENND2A,TCERG1L,TMEM239,SLC35D2,TTC28,TMEM97,KIAA0355,RASGRF1,PLA2G4E,MRGPRF,CTCFL,MESP1,HIC2,NLRP10,GTF2F1,CCDC40,ALDH1L2,ZNF280D,ATXN7,CDH13,AMOT,ZNF154,CD3G,PSTPIP2,HOXD12,BAG1,ZBTB17,ARMC5,MXD3,TM9SF4,SKIDA1,NPLOC4,FAM46A,MASP1,RASD2,SH3RF2,LONRF2,ZMYM4,PRRG3,C11orf57,STOX2,LMOD3,IPO11,TOMM22,…	1148
Cancer, Gastrointestinal Disease, Organismal Injury and Abnormalities	colon carcinoma	colon carcinoma	1.37e-05					GTF2B,PPP2R5E,NTSR1,TMEM43,RTN2,TTC29,USP6NL,AMER3,TOP2A,SEMA5B,ASAP2,KCNJ4,SAMD9L,GPR83,DENND2A,TCERG1L,SLC35D2,TTC28,TMEM97,KIAA0355,RASGRF1,PLA2G4E,MRGPRF,CTCFL,MESP1,HIC2,NLRP10,CCDC40,ALDH1L2,ZNF280D,ATXN7,CDH13,AMOT,ZNF154,CD3G,PSTPIP2,HOXD12,BAG1,ZBTB17,ARMC5,MXD3,TM9SF4,SKIDA1,NPLOC4,FAM46A,MASP1,RASD2,SH3RF2,LONRF2,ZMYM4,PRRG3,C11orf57,STOX2,LMOD3,IPO11,TOMM22,CECR1,PTPN18,CES3,GGCX,C14o…	1096
Cellular Assembly and Organization, Cellular Movement, Nervous System Development and Function	transport	transport of synaptic vesicles	1.54e-05					STON2,ITSN1,SNAP25,VAMP2,DNAJC5,TOR1A,RIMS1,PIP5K1C,PPP3CC,SPG11	10
Cancer, Gastrointestinal Disease, Organismal Injury and Abnormalities	colon tumor	colon tumor	2.06e-05					GTF2B,PPP2R5E,NTSR1,TMEM43,RTN2,TTC29,USP6NL,AMER3,TOP2A,SEMA5B,ASAP2,KCNJ4,SAMD9L,GPR83,DENND2A,TCERG1L,SLC35D2,TTC28,TMEM97,KIAA0355,RASGRF1,PLA2G4E,MRGPRF,CTCFL,MESP1,HIC2,NLRP10,CCDC40,ALDH1L2,ZNF280D,ATXN7,CDH13,AMOT,ZNF154,CD3G,PSTPIP2,HOXD12,BAG1,ZBTB17,ARMC5,MXD3,TM9SF4,SKIDA1,NPLOC4,FAM46A,MASP1,RAB3A,RASD2,SH3RF2,LONRF2,ZMYM4,PRRG3,C11orf57,STOX2,LMOD3,IPO11,TOMM22,MYEF2,CECR1,PTPN18,CE…	1148
Cancer, Gastrointestinal Disease, Organismal Injury and Abnormalities	colon cancer	colon cancer	2.98e-05					GTF2B,PPP2R5E,NTSR1,TMEM43,RTN2,TTC29,USP6NL,AMER3,TOP2A,SEMA5B,ASAP2,KCNJ4,SAMD9L,GPR83,DENND2A,TCERG1L,SLC35D2,TTC28,TMEM97,KIAA0355,RASGRF1,PLA2G4E,MRGPRF,CTCFL,MESP1,HIC2,NLRP10,CCDC40,ALDH1L2,ZNF280D,ATXN7,CDH13,AMOT,ZNF154,CD3G,PSTPIP2,HOXD12,BAG1,ZBTB17,ARMC5,MXD3,TM9SF4,SKIDA1,NPLOC4,FAM46A,MASP1,RAB3A,RASD2,SH3RF2,LONRF2,ZMYM4,PRRG3,C11orf57,STOX2,LMOD3,IPO11,TOMM22,MYEF2,CECR1,PTPN18,CE…	1138
Cellular Movement	cell movement	cell movement	4.02e-05					ROPN1B,CCR7,AGER,CORO1A,LPAR1,CCL8,CD72,TNFRSF1A,SELL,MIA3,GALNT2,DPAGT1,SH3PXD2B,COL1A1,CSE1L,GRN,LRIG1,NKX2-1,BCL10,PIP5K1C,FES,TNFRSF11A,RNF20,NPY,EFNB1,S100A7A,TRPM7,ASAP2,CDX1,CCL11,DPYSL2,VASH1,CTNNAL1,SSH1,AR,GDNF,RALBP1,DNAJA3,DNAH5,NRP1,TP73,APOA1,VPS28,FOXD3,FAS,RHOU,ZNF217,KIAA0319,WNT5A,GNAO1,FOXP1,CCL16,IL6,HACE1,HOXA4,AGK,PTPRH,BTG2,CCDC40,BCAR3,DCN,BCAM,PRKD2,EFNA2,HTR2A,SHOC2,CDH1…	358
Cancer, Organismal Injury and Abnormalities	melanoma	melanoma	6.66e-05					PAOX,RNF219,CCL8,NTSR1,CERCAM,TESPA1,TTC29,AMER3,SORL1,YIPF1,CDRT1,C1orf106,S100A7A,CPPED1,RSRC2,KCNJ4,SDR16C5,SAMD9L,FAM105A,TMEM189,TMCC3,TTC28,KIAA0355,NUDT1,RASGRF1,MRGPRF,XPNPEP2,ASB12,PRM1,PPP2R3A,AGK,C19orf44,SCML4,NLRP10,GTF2F1,CCDC40,ZNF280D,DCN,NANOG,CDH13,ZNF154,MS4A3,UBR1,HOXD12,SLC30A10,MXD3,NT5DC1,TM9SF4,SKIDA1,PCNX4,TRIM56,FAM46A,MASP1,RASD2,NCKAP1L,GSDMB,SLC47A1,NEBL,NKAIN1,MIER1,…	1810
Dermatological Diseases and Conditions, Organismal Injury and Abnormalities	skin lesion	skin lesion	9.92e-05					RNF219,CCL8,NTSR1,CERCAM,TESPA1,TTC29,AMER3,SORL1,YIPF1,CDRT1,C1orf106,TOP2A,S100A7A,CPPED1,RSRC2,AMFR,KCNJ4,SDR16C5,SAMD9L,FAM105A,TMEM189,TMCC3,TTC28,KIAA0355,NUDT1,RASGRF1,MRGPRF,XPNPEP2,ASB12,PRM1,PPP2R3A,AGK,C19orf44,SCML4,NLRP10,CCDC40,ZNF280D,DCN,CDH13,MS4A3,UBR1,HOXD12,SLC30A10,TM9SF4,SKIDA1,PCNX4,TRIM56,FAM46A,MASP1,RASD2,NCKAP1L,GSDMB,SLC47A1,NEBL,NKAIN1,MIER1,ARID5A,NT5DC2,ZNF790,SKA3,…	1619
Cancer, Dermatological Diseases and Conditions, Organismal Injury and Abnormalities	skin cancer	skin cancer	0.0001					RNF219,CCL8,NTSR1,CERCAM,TESPA1,TTC29,AMER3,SORL1,YIPF1,CDRT1,C1orf106,TOP2A,S100A7A,CPPED1,RSRC2,AMFR,KCNJ4,SDR16C5,SAMD9L,FAM105A,TMEM189,TMCC3,TTC28,KIAA0355,NUDT1,RASGRF1,MRGPRF,XPNPEP2,ASB12,PRM1,PPP2R3A,AGK,C19orf44,SCML4,NLRP10,CCDC40,ZNF280D,DCN,CDH13,MS4A3,UBR1,HOXD12,SLC30A10,TM9SF4,SKIDA1,PCNX4,TRIM56,FAM46A,MASP1,RASD2,NCKAP1L,GSDMB,SLC47A1,NEBL,NKAIN1,MIER1,ARID5A,NT5DC2,ZNF790,SKA3,…	1617
Cardiovascular System Development and Function, Cellular Development, Cellular Function and Maintenance, Cellular Growth and Proliferation, Organismal Development, Tissue Development	proliferation	proliferation of endothelial cells	0.000123					AGER,C3,KLK3,F2R,PDCL3,DICER1,BMP4,ATP5A1,TGFBR1,VEGFC,COL4A1,FABP4,RCAN1,TRPM7,SEMA6A,ENG,CCL11,VASH1,TIMP2,EGFL7,PTPN1,BMPR2,EPO,CDKN1B,NRP1,STX6,BCLAF1,SERPINE1,HRH2,GBP1,CXCL12,CSNK1A1,F2RL1,MYDGF,WNT5A,HIPK1,SYNJ2BP,TP53,FN1,CDKN1A,ITGB3,PRKD2,FOXO1,NANOG,CDH13,ZG16B,PLXNB3,PDE2A,STK39,NDP,ANGPTL1,ING4,CHGA,LOXL2,PRKCA,HIF1A,HSPA5,CSF1,F3,PROCR,LEP,AXL	62
Gene Expression	transcription	transcription of DNA	0.000191					CNBP,FOXJ1,SUPT3H,KLF15,TNFRSF1A,RAX,POLR2F,ZNHIT3,COL1A1,ELF1,CHMP1A,OR7D2,KLF14,NKX2-1,BCL10,RNF20,TGFBRAP1,USP22,DR1,FOXN3,CDX1,GREM1,ZC3H8,AR,GDNF,FOXE1,CDK5R1,DNAJA3,CRTC1,ZNF274,RBAK,YY1,TP73,ZNF423,FOXD3,BCLAF1,SAP130,ZNF177,ZNF217,NUP62,WNT5A,CTCFL,PTCH1,FOXP1,NLRC5,CXXC1,IL6,ELK4,MESP1,SIN3A,DCN,NCOR1,ARID5B,PRKD2,WWP2,WNT3A,NANOG,CDH13,TRPS1,TAF2,ASXL2,PDE2A,KLF2,EID2,ING4,NACC1,TGIF1,H…	270
Cancer, Dermatological Diseases and Conditions, Organismal Injury and Abnormalities	cutaneous melanoma	cutaneous melanoma	0.000204					ROPN1B,RNF219,S100Z,CCL8,KIAA1217,NTSR1,TMEM43,SAR1B,CERCAM,TESPA1,TTC29,DCAF16,KLF14,USP6NL,AMER3,SORL1,LUZP2,YIPF1,CDRT1,C1orf106,ABTB2,SEMA5B,SENP5,KCNK17,S100A7A,CPPED1,RSRC2,KCNJ4,SDR16C5,SAMD9L,SEMA4B,GPR83,FAM105A,DENND2A,COMMD8,TMEM189,DKK4,TMCC3,ZNF20,TTC28,KIAA0355,NUDT1,RASGRF1,MRGPRF,XPNPEP2,CTCFL,SLAMF8,ASB12,PRM1,PPP2R3A,BCAS4,AGK,C19orf44,SCML4,VTI1A,NLRP10,CCDC40,ALDH1L2,ZNF280D,A…	1534
Tissue Development	development	development of epithelial tissue	0.000209					AGER,FOXJ1,C3,KLK3,MYCL,GDF11,KLHL20,F2R,PDCL3,DICER1,BMP4,ATP5A1,TGFBR1,SOX2,VEGFC,COL4A1,FABP4,RCAN1,TRPM7,SEMA6A,ENG,CCL11,VASH1,TIMP2,EGFL7,PTPN1,BMPR2,EPO,SLIT2,CDKN1B,NRP1,GRHL2,STX6,BCLAF1,SERPINE1,RIPK4,HRH2,GBP1,CXCL12,CSNK1A1,F2RL1,MYDGF,WNT5A,HIPK1,SYNJ2BP,COL4A4,TP53,FN1,CEP104,CDKN1A,MET,ITGB3,PRKD2,FOXO1,NANOG,CDH13,ZG16B,PLXNB3,PAK1,PDE2A,STK39,KRT18,NDP,ANGPTL1,ING4,CHGA,LOXL2,PRK…	76
Cancer, Organismal Injury and Abnormalities	cancer	cancer of secretory structure	0.000224					ROPN1B,PAOX,RNF219,NTSR1,TESPA1,NDE1,AMER3,MTO1,TOP2A,ABTB2,SEMA5B,AMFR,TM2D3,KCNJ4,RPS6KC1,GPR83,DENND2A,TCERG1L,RASGRF1,ENOPH1,ASB12,C19orf44,STRIP1,AMOT,PSTPIP2,NASP,BAG1,TM9SF4,SKIDA1,TRIM56,FAM46A,MASP1,SLC47A1,NEBL,LONRF2,IPO11,SLC16A3,ELK1,RRM2,GGCX,SMG6,ANO6,HHLA1,KANK3,TAB3,STUM,ADRA2B,PPP1R9A,PXDN,SLIT2,TLE3,JOSD1,IRX2,SELPLG,DEPDC5,ASXL3,BFAR,ERVW-1,ATXN7L1,NXF1,GLG1,GRIA3,PNPLA8,USP24…	816
Cancer, Gastrointestinal Disease, Organismal Injury and Abnormalities	gastric epithelial cancer	gastric carcinoma	0.000244					CORO1A,LAMC3,KIAA1217,FAM135B,DPP6,CCDC25,DPAGT1,RTN2,COL1A1,NEUROD4,TESPA1,PI3,LILRB4,DERL2,LRIG1,USP6NL,ARID1B,SLCO5A1,CEP63,SCUBE1,YIPF1,KYNU,TOP2A,C9orf84,ZBED1,SIAH2,HSP90B1,TM2D3,KCNJ4,DHX33,AR,TAP2,DNAH5,TCERG1L,TP73,ZNF423,IQSEC2,FYCO1,TPO,ZNF217,TMEM97,KIAA2022,MCM7,PTCH1,FOXP1,HPSE,C17orf74,MAGI2,FFAR3,SIK2,EXTL3,SLC22A11,AXIN2,ERGIC2,HIC2,RTTN,OR10J1,HAP1,CCDC40,ADCY2,BCAM,ARID5B,PCDH1…	309
Cardiovascular System Development and Function, Cellular Development, Cellular Function and Maintenance, Cellular Growth and Proliferation, Organismal Development, Tissue Development	cell proliferation	cell proliferation of vascular endothelial cells	0.000254					AGER,CXCL12,CSNK1A1,F2RL1,C3,HIPK1,KLK3,F2R,FN1,PDCL3,DICER1,CDKN1A,FOXO1,NANOG,CDH13,ZG16B,FABP4,RCAN1,SEMA6A,ENG,PDE2A,VASH1,PTPN1,STK39,NDP,ING4,CHGA,CDKN1B,HIF1A,NRP1,HSPA5,STX6,BCLAF1,LEP,HRH2	35
Cellular Movement	migration	migration of cells	0.000273					CCR7,AGER,CORO1A,LPAR1,CCL8,CD72,TNFRSF1A,SELL,MIA3,GALNT2,DPAGT1,SH3PXD2B,COL1A1,CSE1L,GRN,NKX2-1,BCL10,PIP5K1C,TNFRSF11A,RNF20,NPY,EFNB1,S100A7A,TRPM7,ASAP2,CDX1,CCL11,DPYSL2,VASH1,CTNNAL1,SSH1,AR,GDNF,RALBP1,DNAJA3,NRP1,TP73,APOA1,VPS28,FOXD3,FAS,RHOU,KIAA0319,WNT5A,GNAO1,FOXP1,CCL16,IL6,HACE1,HOXA4,AGK,PTPRH,BTG2,BCAR3,DCN,BCAM,PRKD2,SHOC2,CDH13,AMOT,ARFGEF1,PACSIN2,CD58,BAG1,LPP,PDE2A,KLF2,P…	311
Cancer, Endocrine System Disorders, Organismal Injury and Abnormalities, Reproductive System Disease	epithelial ovarian tumor	malignant epithelial ovarian tumor	0.000337					ZNF100,HOXC8,FAM107A,DPP6,CERCAM,NEUROD4,FOXO6,WTIP,OR7D2,DCAF16,LRIG1,LUC7L3,BCL10,AMER3,ARID1B,PMFBP1,ZC3H7B,FES,KPNA1,TGFBRAP1,TOP2A,EFNB1,KRTAP4-2,HSP90B1,KCNJ4,ADAMTS10,CTNNAL1,AR,FAM105A,THNSL1,DNAH5,NRP1,ZNF274,ARG2,TP73,BCLAF1,AKR1C1/AKR1C2,OCA2,GTF2IRD1,TPO,KIAA0355,PTX4,ERCC1,KRTAP1-5,PBRM1,ELAVL3,CLEC17A,ABCC11,ARHGAP44,GRID1,EPHA3,PROSER3,MAGI2,POLR1D,SIK2,AGK,AXIN2,FAM69A,SIN3A,ADCY2…	359
Cancer, Organismal Injury and Abnormalities, Reproductive System Disease	genital tract cancer	genital tract cancer	0.000338					PAOX,TMEM11,RIC8A,S100Z,KIAA1217,CERCAM,DCAF16,USP6NL,AMER3,SORL1,MTO1,MMAA,CDRT1,C1orf106,TOP2A,HDX,SENP5,KCNK17,AMFR,TM2D3,KCNJ4,SAMD9L,RPS6KC1,FAM105A,DENND2A,PHLDA3,TMCC3,TTC28,KIAA0355,MRGPRF,ASB12,TPM4,TMUB2,HOXA4,C16orf45,AGK,C19orf44,NLRP10,DCN,STRIP1,ATF7IP2,CDH13,NASP,CEP44,ZBTB17,SKIDA1,MASP1,RNF220,GSDMB,SH3RF2,RGS4,NR6A1,ZNF790,C11orf57,STOX2,IPO11,SKA3,SLC16A3,TMEM127,RRM2,GGCX,SMG6…	1115
Cancer, Gastrointestinal Disease, Organismal Injury and Abnormalities	gastric adenocarcinoma	gastric adenocarcinoma	0.000341					CORO1A,LAMC3,KIAA1217,FAM135B,DPP6,CCDC25,DPAGT1,RTN2,NEUROD4,TESPA1,PI3,LILRB4,DERL2,LRIG1,USP6NL,ARID1B,SLCO5A1,CEP63,SCUBE1,YIPF1,KYNU,TOP2A,C9orf84,ZBED1,SIAH2,HSP90B1,TM2D3,KCNJ4,DHX33,AR,TAP2,DNAH5,TCERG1L,ZNF423,IQSEC2,FYCO1,TPO,ZNF217,KIAA2022,MCM7,PTCH1,FOXP1,HPSE,C17orf74,MAGI2,FFAR3,SIK2,EXTL3,SLC22A11,AXIN2,ERGIC2,HIC2,RTTN,OR10J1,HAP1,CCDC40,ADCY2,BCAM,ARID5B,PCDH17,WWP2,ANKRD40,ZNF7…	296
Cell Cycle	G2/M phase	arrest in G2/M phase of colorectal cancer cell lines	0.000356					MGMT,LIMK2,CHEK2,CELF2,TP53,CHEK1	6
Cancer, Endocrine System Disorders, Organismal Injury and Abnormalities, Reproductive System Disease	ovarian adenocarcinoma	ovarian adenocarcinoma	0.000359					ZNF100,HOXC8,FAM107A,DPP6,CERCAM,NEUROD4,FOXO6,WTIP,OR7D2,DCAF16,LRIG1,LUC7L3,BCL10,AMER3,ARID1B,PMFBP1,ZC3H7B,FES,KPNA1,TGFBRAP1,TOP2A,EFNB1,KRTAP4-2,HSP90B1,KCNJ4,ADAMTS10,CTNNAL1,AR,FAM105A,THNSL1,DNAH5,NRP1,ZNF274,ARG2,BCLAF1,AKR1C1/AKR1C2,GTF2IRD1,TPO,KIAA0355,PTX4,ERCC1,PBRM1,ELAVL3,CLEC17A,ABCC11,ARHGAP44,GRID1,EPHA3,PROSER3,MAGI2,POLR1D,SIK2,AGK,AXIN2,FAM69A,SIN3A,ADCY2,NCOR1,ARID5B,PCDH1…	338
Cancer, Endocrine System Disorders, Organismal Injury and Abnormalities, Reproductive System Disease	ovarian cancer	ovarian cancer	0.000409					CERCAM,WTIP,DCAF16,AMER3,TOP2A,KCNJ4,CTNNAL1,FAM105A,THNSL1,RALBP1,NRP1,GTF2IRD1,KIAA0355,PTX4,ELAVL3,TPM4,MAGI2,IL6,HOXA4,SIK2,AGK,FAM69A,SIN3A,PCDH17,STRIP1,ATF7IP2,PNLIPRP1,CEACAM7,NPC1L1,OTUD4,NCAM1,GART,SH3RF2,C9orf3,ZNF790,EXT1,VRTN,SLC16A3,TMEM127,AKNA,RRM2,SMG6,KANK3,COL4A1,C2CD3,BDH1,KIAA0825,ACVR1B,ZZEF1,SLIT2,CABIN1,CDKN1B,SHANK2,DEPDC5,PRIM1,SMC1A,SLC39A13,GLG1,ALDH1A2,E2F2,LRRC47,PTC…	403
Cancer, Organismal Injury and Abnormalities, Reproductive System Disease	tumorigenesis	tumorigenesis of genital tumor	0.000434					TMEM11,RIC8A,S100Z,KIAA1217,CERCAM,DCAF16,AMER3,SORL1,MMAA,CDRT1,C1orf106,TOP2A,HDX,SENP5,KCNK17,KCNJ4,SAMD9L,FAM105A,DENND2A,TMCC3,TTC28,KIAA0355,ASB12,TMUB2,AGK,NLRP10,DCN,STRIP1,ATF7IP2,CDH13,CEP44,ZBTB17,SKIDA1,MASP1,RNF220,SH3RF2,RGS4,NR6A1,ZNF790,C11orf57,STOX2,SKA3,TMEM127,RRM2,SMG6,ABCC6,BCOR,NR0B1,UBE2QL1,NOP14,SLC2A2,BDH1,LRRC27,PPP1R9A,ZNF195,SLIT2,CABIN1,PICALM,SLC24A3,EDEM3,WBSCR22,I…	844
Cancer, Organismal Injury and Abnormalities	breast or ovarian carcinoma	breast or ovarian carcinoma	0.000451					ZNF799,NTSR1,PYHIN1,CERCAM,WTIP,DCAF16,AMER3,SORL1,IGFN1,TOP2A,AMFR,KCNJ4,THEM4,CTNNAL1,GREM1,FAM105A,SYT17,WDR55,ATP10A,THNSL1,RALBP1,NRP1,CHST7,CCDC30,GTF2IRD1,TMEM97,KIAA0355,PTX4,ELAVL3,MAGI2,SIK2,AGK,ZNF114,FKBP5,FAM69A,SIN3A,PCDH17,STRIP1,ATF7IP2,AMOT,PNLIPRP1,CEACAM7,PSTPIP2,NASP,NPC1L1,OTUD4,BAG1,PTPN3,MAP1LC3B,UBE3A,NCAM1,GART,GSDMB,RPS6KA1,SH3RF2,C9orf3,ZNF790,EXT1,VRTN,CECR1,TMEM127,AK…	525
Gene Expression	expression	expression of RNA	0.000479					CNBP,GTF2B,AGER,FOXJ1,SUPT3H,LPAR1,TERF2,KLF15,TNFRSF1A,EIF4B,RAX,POLR2F,ZNHIT3,COL1A1,FLOT2,ELF1,CHMP1A,CSE1L,OR7D2,KLF14,NKX2-1,BCL10,ARID1B,TNFRSF11A,RNF20,TGFBRAP1,USP22,CD3EAP,DR1,DARS,FOXN3,CDX1,RFX5,GREM1,ZC3H8,AR,GDNF,FOXE1,CDK5R1,DNAJA3,CRTC1,ZNF274,RBAK,YY1,TP73,ZNF423,FOXD3,BCLAF1,SAP130,ZNF177,FAS,ZNF217,RASGRF1,NUP62,WNT5A,CTCFL,PTCH1,FOXP1,HPSE,NLRC5,CXXC1,PTPN22,IL6,ELK4,MESP1,BTG2…	375
Gene Expression	transcription	transcription	0.000492					CNBP,GTF2B,AGER,FOXJ1,SUPT3H,LPAR1,TERF2,KLF15,TNFRSF1A,RAX,POLR2F,ZNHIT3,COL1A1,FLOT2,ELF1,CHMP1A,CSE1L,OR7D2,KLF14,NKX2-1,BCL10,ARID1B,RNF20,TGFBRAP1,USP22,CD3EAP,DR1,FOXN3,CDX1,RFX5,GREM1,ZC3H8,AR,GDNF,FOXE1,CDK5R1,DNAJA3,CRTC1,ZNF274,RBAK,YY1,TP73,ZNF423,FOXD3,BCLAF1,SAP130,ZNF177,ZNF217,RASGRF1,NUP62,WNT5A,CTCFL,PTCH1,FOXP1,HPSE,NLRC5,CXXC1,PTPN22,IL6,ELK4,MESP1,BTG2,SIN3A,DCN,NCOR1,ARID5B,P…	352
Cancer, Endocrine System Disorders, Gastrointestinal Disease, Organismal Injury and Abnormalities	pancreatic ductal adenocarcinoma	pancreatic ductal adenocarcinoma	0.000503					ROPN1B,DNA2,PAOX,RNF219,VWA2,TERF2,PYHIN1,MIA3,TESPA1,NDE1,LILRB4,AMER1,AMER3,RPA1,SLITRK3,IGFN1,ABTB2,SEMA5B,CPN2,AMFR,PABPC1,CCL11,UBE2G1,PCMTD2,GPR83,ANP32E,SYT17,ATP10A,THNSL1,TGM4,DENND2A,TCERG1L,ZNF423,GNPTG,CTH,TSPEAR,RASGRF1,ENOPH1,ASB12,MAGI2,SIK2,R3HDM2,C19orf44,GREB1,TPRG1,FIBCD1,SIN3A,STRIP1,AMOT,FIGNL1,PSTPIP2,NPC1L1,LPP,PTPN3,TM9SF4,TRIM56,MASP1,CELF2,DPY19L1,SLC47A1,NEBL,LONRF2,HEG…	542
Cancer, Organismal Injury and Abnormalities, Reproductive System Disease	female genital tract adenocarcinoma	female genital tract adenocarcinoma	0.000624					TMEM11,RIC8A,S100Z,KIAA1217,CERCAM,DCAF16,AMER3,SORL1,MMAA,CDRT1,C1orf106,TOP2A,HDX,SENP5,KCNK17,KCNJ4,SAMD9L,FAM105A,DENND2A,TMCC3,TTC28,KIAA0355,ASB12,TMUB2,AGK,NLRP10,DCN,STRIP1,ATF7IP2,CDH13,CEP44,ZBTB17,SKIDA1,MASP1,RNF220,SH3RF2,RGS4,NR6A1,ZNF790,C11orf57,STOX2,SKA3,SLC16A3,TMEM127,RRM2,SMG6,ABCC6,BCOR,NR0B1,UBE2QL1,NOP14,SLC2A2,BDH1,LRRC27,PPP1R9A,FGL2,ZNF195,SLIT2,CABIN1,PICALM,SLC24A3,ED…	866
Gene Expression	transcription	transcription of RNA	0.000637					CNBP,GTF2B,AGER,FOXJ1,SUPT3H,LPAR1,KLF15,TNFRSF1A,RAX,POLR2F,ZNHIT3,COL1A1,ELF1,CHMP1A,CSE1L,OR7D2,KLF14,NKX2-1,BCL10,ARID1B,RNF20,TGFBRAP1,USP22,CD3EAP,DR1,FOXN3,CDX1,RFX5,GREM1,ZC3H8,AR,GDNF,FOXE1,CDK5R1,DNAJA3,CRTC1,ZNF274,RBAK,YY1,TP73,ZNF423,FOXD3,BCLAF1,SAP130,ZNF177,ZNF217,RASGRF1,NUP62,WNT5A,CTCFL,PTCH1,FOXP1,HPSE,NLRC5,CXXC1,IL6,ELK4,MESP1,BTG2,SIN3A,DCN,NCOR1,ARID5B,PRKD2,WWP2,WNT3A,NAN…	325
Cellular Development, Cellular Function and Maintenance, Connective Tissue Development and Function	adipogenesis	adipogenesis of hepatoma cell lines	0.000663					LPIN1,SREBF1,FMO3,TRA2B	4
Cell-To-Cell Signaling and Interaction	binding	binding of lymphoma cell lines	0.000766					S1PR2,CXCL12,CD59,HCK,RCAN1,TNFRSF8,ELN,IL6,NFKBIA,F2R,FN1,PRKCA,PNPLA2,VCAN,SELPLG,CD55,DCN,JAM3,NOS3,SH2D1A,FOXO1,F2,WNT3A	23
Cancer, Organismal Injury and Abnormalities, Reproductive System Disease	tumorigenesis	tumorigenesis of genital organ	0.00078					PAOX,TMEM11,RIC8A,S100Z,KIAA1217,NTSR1,CERCAM,DCAF16,USP6NL,AMER3,SORL1,MTO1,MMAA,CDRT1,C1orf106,TOP2A,HDX,SENP5,KCNK17,AMFR,TM2D3,KCNJ4,SAMD9L,RPS6KC1,FAM105A,DENND2A,PHLDA3,TMCC3,TTC28,KIAA0355,MRGPRF,ASB12,TPM4,TMUB2,HOXA4,C16orf45,AGK,C19orf44,NLRP10,DCN,STRIP1,ATF7IP2,CDH13,NASP,CEP44,ZBTB17,SKIDA1,MASP1,RNF220,GSDMB,SH3RF2,RGS4,NR6A1,ZNF790,C11orf57,STOX2,IPO11,SKA3,SLC16A3,TMEM127,RRM2,GGC…	1139
Cancer, Endocrine System Disorders, Gastrointestinal Disease, Organismal Injury and Abnormalities	pancreatic tumor	pancreatic tumor	0.000806					ROPN1B,DNA2,PAOX,RNF219,VWA2,TERF2,NTSR1,PYHIN1,MIA3,TESPA1,NDE1,LILRB4,TBX20,AMER1,AMER3,RPA1,SLITRK3,IGFN1,PELI3,TOP2A,ABTB2,SEMA5B,SENP5,CPN2,AMFR,PABPC1,CCL11,UBE2G1,PCMTD2,ISLR2,GPR83,ANP32E,SYT17,ATP10A,THNSL1,TGM4,DENND2A,TCERG1L,ZNF423,RAVER2,ZNF277,GNPTG,CTH,CCDC30,TSPEAR,RASGRF1,ENOPH1,ASB12,PTPN22,MAGI2,IL6,SIK2,R3HDM2,C19orf44,GREB1,NLRP10,TPRG1,FIBCD1,SIN3A,STRIP1,AMOT,FIGNL1,ZNF154,…	669
Cardiovascular System Development and Function, Cellular Development, Cellular Function and Maintenance, Cellular Growth and Proliferation, Organismal Development, Tissue Development	development	endothelial cell development	0.000808					AGER,C3,KLK3,KLHL20,F2R,PDCL3,DICER1,BMP4,ATP5A1,TGFBR1,VEGFC,COL4A1,FABP4,RCAN1,TRPM7,SEMA6A,ENG,CCL11,VASH1,TIMP2,EGFL7,PTPN1,BMPR2,EPO,CDKN1B,NRP1,STX6,BCLAF1,SERPINE1,HRH2,GBP1,CXCL12,CSNK1A1,F2RL1,MYDGF,WNT5A,HIPK1,SYNJ2BP,TP53,FN1,CDKN1A,MET,ITGB3,PRKD2,FOXO1,NANOG,CDH13,ZG16B,PLXNB3,PDE2A,STK39,NDP,ANGPTL1,ING4,CHGA,LOXL2,PRKCA,HIF1A,HSPA5,CSF1,F3,PROCR,LEP,ECT2,AXL	65
Cancer, Endocrine System Disorders, Gastrointestinal Disease, Organismal Injury and Abnormalities	carcinoma	carcinoma in pancreas	0.000816					ROPN1B,DNA2,PAOX,RNF219,VWA2,TERF2,PYHIN1,MIA3,TESPA1,NDE1,LILRB4,AMER1,AMER3,RPA1,SLITRK3,IGFN1,ABTB2,SEMA5B,CPN2,AMFR,PABPC1,CCL11,UBE2G1,PCMTD2,GPR83,ANP32E,SYT17,ATP10A,THNSL1,TGM4,DENND2A,TCERG1L,ZNF423,GNPTG,CTH,TSPEAR,RASGRF1,ENOPH1,ASB12,MAGI2,SIK2,R3HDM2,C19orf44,GREB1,TPRG1,FIBCD1,SIN3A,STRIP1,AMOT,FIGNL1,PSTPIP2,NPC1L1,LPP,PTPN3,TM9SF4,TRIM56,MASP1,CELF2,DPY19L1,SLC47A1,NEBL,LONRF2,HEG…	553
Cancer, Organismal Injury and Abnormalities, Reproductive System Disease	genital tumor	genital tumor	0.000835					PAOX,TMEM11,RIC8A,S100Z,KIAA1217,NTSR1,CERCAM,DCAF16,USP6NL,AMER3,SORL1,MTO1,MMAA,CDRT1,C1orf106,TOP2A,HDX,SENP5,KCNK17,AMFR,TM2D3,KCNJ4,SAMD9L,RPS6KC1,FAM105A,DENND2A,PHLDA3,TMCC3,TTC28,KIAA0355,MRGPRF,ASB12,TPM4,TMUB2,HOXA4,C16orf45,AGK,C19orf44,NLRP10,DCN,STRIP1,ATF7IP2,CDH13,NASP,CEP44,ZBTB17,SKIDA1,MASP1,RNF220,GSDMB,SH3RF2,RGS4,NR6A1,ZNF790,C11orf57,STOX2,IPO11,SKA3,SLC16A3,TMEM127,RRM2,GGC…	1139
Cancer, Endocrine System Disorders, Organismal Injury and Abnormalities, Reproductive System Disease	gonadal tumor	gonadal tumor	0.000847					CERCAM,WTIP,DCAF16,USP6NL,AMER3,TOP2A,KCNJ4,CTNNAL1,FAM105A,THNSL1,RALBP1,NRP1,GTF2IRD1,KIAA0355,PTX4,ELAVL3,TPM4,MAGI2,IL6,HOXA4,SIK2,AGK,FAM69A,SIN3A,PCDH17,STRIP1,ATF7IP2,PNLIPRP1,CEACAM7,NPC1L1,OTUD4,NCAM1,GART,RPS6KA1,SH3RF2,C9orf3,ZNF790,EXT1,VRTN,SLC16A3,MYCL,TMEM127,AKNA,RRM2,SMG6,KANK3,COL4A1,C2CD3,BDH1,KIAA0825,ACVR1B,ZZEF1,SLIT2,CABIN1,TLE3,CDKN1B,SHANK2,DEPDC5,PRIM1,SMC1A,SLC39A13,GLG…	420
Cancer, Endocrine System Disorders, Organismal Injury and Abnormalities, Reproductive System Disease	neoplasia	Ovarian Cancer and Tumors	0.000852					CERCAM,WTIP,DCAF16,AMER3,TOP2A,KCNJ4,CTNNAL1,FAM105A,THNSL1,RALBP1,NRP1,GTF2IRD1,KIAA0355,PTX4,ELAVL3,TPM4,MAGI2,IL6,HOXA4,SIK2,AGK,FAM69A,SIN3A,PCDH17,STRIP1,ATF7IP2,PNLIPRP1,CEACAM7,NPC1L1,OTUD4,NCAM1,GART,SH3RF2,C9orf3,ZNF790,EXT1,VRTN,SLC16A3,TMEM127,AKNA,RRM2,SMG6,KANK3,COL4A1,C2CD3,BDH1,KIAA0825,ACVR1B,ZZEF1,SLIT2,CABIN1,CDKN1B,SHANK2,DEPDC5,PRIM1,SMC1A,SLC39A13,GLG1,ALDH1A2,E2F2,LRRC47,PTC…	406
Cancer, Gastrointestinal Disease, Organismal Injury and Abnormalities	colorectal neoplasia	colorectal neoplasia	0.000871					GTF2B,PPP2R5E,NTSR1,TMEM43,RTN2,TTC29,USP6NL,AMER3,SORL1,LUZP2,TOP2A,SEMA5B,ASAP2,KCNJ4,SAMD9L,GPR83,DENND2A,TCERG1L,TMEM239,SLC35D2,TTC28,TMEM97,KIAA0355,RASGRF1,PLA2G4E,MRGPRF,CTCFL,CCL16,MESP1,HIC2,NLRP10,GTF2F1,CCDC40,ALDH1L2,ZNF280D,ATXN7,CDH13,AMOT,ZNF154,CD3G,PSTPIP2,HOXD12,BAG1,ZBTB17,SLC30A10,ARMC5,MXD3,TM9SF4,SKIDA1,NPLOC4,FAM46A,MASP1,RAB3A,RASD2,NEBL,SH3RF2,RGS4,LONRF2,ZMYM4,PRRG3,C11…	1280
Cancer, Endocrine System Disorders, Gastrointestinal Disease, Organismal Injury and Abnormalities	pancreatic adenocarcinoma	pancreatic adenocarcinoma	0.000914					ROPN1B,DNA2,PAOX,RNF219,VWA2,TERF2,PYHIN1,MIA3,TESPA1,NDE1,LILRB4,AMER1,AMER3,RPA1,SLITRK3,IGFN1,ABTB2,SEMA5B,CPN2,AMFR,PABPC1,CCL11,UBE2G1,PCMTD2,GPR83,ANP32E,SYT17,ATP10A,THNSL1,TGM4,DENND2A,TCERG1L,ZNF423,GNPTG,CTH,TSPEAR,RASGRF1,ENOPH1,ASB12,MAGI2,SIK2,R3HDM2,C19orf44,GREB1,TPRG1,FIBCD1,SIN3A,STRIP1,AMOT,FIGNL1,PSTPIP2,NPC1L1,LPP,PTPN3,TM9SF4,TRIM56,MASP1,CELF2,DPY19L1,SLC47A1,NEBL,LONRF2,HEG…	549
Cancer, Gastrointestinal Disease, Organismal Injury and Abnormalities	gastroesophageal adenocarcinoma	gastroesophageal adenocarcinoma	0.000987					RNF219,CORO1A,LAMC3,KIAA1217,FAM135B,DPP6,CCDC25,DPAGT1,RTN2,NEUROD4,TESPA1,PI3,LILRB4,DERL2,LRIG1,USP6NL,ARID1B,KIF6,SLCO5A1,CEP63,SCUBE1,YIPF1,KYNU,TOP2A,C9orf84,ZBED1,S100A7A,SIAH2,HSP90B1,TM2D3,KCNJ4,DHX33,SPOCK2,RPS6KC1,AR,TAP2,DNAH5,WHAMM,TCERG1L,ZNF423,C11orf84,IQSEC2,FYCO1,TPO,ZNF217,KIAA2022,PBRM1,MCM7,PTCH1,FOXP1,HPSE,EPHA3,C17orf74,MAGI2,FFAR3,SIK2,EXTL3,SLC22A11,AXIN2,ERGIC2,HIC2,RTTN…	360
Cardiovascular System Development and Function, Cellular Movement	migration	migration of endothelial cells	0.000999					KLK3,GATA3,KLHL20,F2R,ARHGEF6,DICER1,BMP4,NOS3,TGFBR1,COL4A1,MAPKAPK5,ALCAM,RCAN1,SP100,TRPM7,PRKG1,ENG,TDGF1,VASH1,TIMP2,OLR1,BMPR2,EPO,SLIT2,CDKN1B,NRP1,STX6,SERPINE1,CXCL12,F2RL1,SEMA3E,WNT5A,FOXP1,DGKE,FN1,DLC1,MET,DCN,ITGB3,PRKD2,FOXO1,ANGPT4,CXXC5,CDH13,AMOT,ZG16B,MAP3K7,PDGFRB,PDE2A,ITGA9,KLF2,NDP,ANGPTL1,CHGA,LOXL2,THBD,PRKCA,HIF1A,HSPA5,TIMP3,PLCG1,LEP,AXL,PTP4A3	64
Cancer, Organismal Injury and Abnormalities	ductal carcinoma	ductal carcinoma	0.00101					ROPN1B,DNA2,PAOX,RNF219,VWA2,TERF2,NTSR1,PYHIN1,MIA3,TESPA1,NDE1,LILRB4,AMER1,AMER3,RPA1,SLITRK3,IGFN1,TOP2A,ABTB2,SEMA5B,CPN2,AMFR,PABPC1,CCL11,UBE2G1,PCMTD2,THEM4,GREM1,GPR83,ANP32E,SYT17,ATP10A,THNSL1,TGM4,DENND2A,TCERG1L,ZNF423,GNPTG,CTH,CCDC30,TSPEAR,RASGRF1,ENOPH1,ASB12,MAGI2,SIK2,R3HDM2,C19orf44,GREB1,TPRG1,FIBCD1,SIN3A,STRIP1,AMOT,FIGNL1,PSTPIP2,NPC1L1,LPP,PTPN3,TM9SF4,MAP1LC3B,TRIM56,MAS…	582
Cancer, Gastrointestinal Disease, Hepatic System Disease, Organismal Injury and Abnormalities	hepatobiliary system cancer	hepatobiliary system cancer	0.00105					GTF2B,PAOX,RIC8A,KIAA1217,TESPA1,TTC29,KLF14,AMER3,SORL1,MTO1,LUZP2,CDRT1,TOP2A,HDX,SEMA5B,AMFR,ASAP2,SAMD9L,SEMA4B,LRRN4CL,DENND2A,TCERG1L,TMCC3,TTC28,KIAA0355,RASGRF1,PLA2G4E,HOXA4,AGK,NLRP10,CCDC40,ZNF280D,DCN,STRIP1,CDH13,AMOT,VMA21,PSTPIP2,NASP,HOXD12,CEP44,ZBTB17,ARMC5,MXD3,TM9SF4,SKIDA1,NPLOC4,FAM46A,MASP1,RNF220,CHDH,NCKAP1L,OSBPL11,RGS4,LONRF2,MIER1,ZMYM4,PRRG3,ZNF790,SKA3,MYEF2,ELK1,TME…	1097
Cancer, Gastrointestinal Disease, Hepatic System Disease, Organismal Injury and Abnormalities	cancer	liver cancer	0.00111					GTF2B,PAOX,RIC8A,KIAA1217,TESPA1,TTC29,KLF14,AMER3,SORL1,MTO1,LUZP2,CDRT1,TOP2A,HDX,SEMA5B,AMFR,ASAP2,SAMD9L,SEMA4B,LRRN4CL,DENND2A,TCERG1L,TMCC3,TTC28,KIAA0355,RASGRF1,PLA2G4E,HOXA4,AGK,NLRP10,CCDC40,ZNF280D,DCN,STRIP1,CDH13,AMOT,VMA21,PSTPIP2,NASP,HOXD12,CEP44,ZBTB17,ARMC5,MXD3,TM9SF4,SKIDA1,NPLOC4,FAM46A,MASP1,RNF220,CHDH,NCKAP1L,OSBPL11,RGS4,LONRF2,MIER1,ZMYM4,PRRG3,ZNF790,SKA3,MYEF2,ELK1,TME…	1076
Cancer, Gastrointestinal Disease, Hepatic System Disease, Organismal Injury and Abnormalities	liver carcinoma	liver carcinoma	0.00113					GTF2B,PAOX,RIC8A,KIAA1217,TESPA1,TTC29,KLF14,AMER3,SORL1,MTO1,LUZP2,CDRT1,TOP2A,HDX,SEMA5B,AMFR,ASAP2,SAMD9L,SEMA4B,LRRN4CL,DENND2A,TCERG1L,TMCC3,TTC28,KIAA0355,RASGRF1,PLA2G4E,HOXA4,AGK,NLRP10,CCDC40,ZNF280D,DCN,STRIP1,CDH13,AMOT,VMA21,PSTPIP2,NASP,HOXD12,CEP44,ZBTB17,ARMC5,MXD3,TM9SF4,SKIDA1,NPLOC4,FAM46A,RNF220,CHDH,NCKAP1L,OSBPL11,RGS4,LONRF2,MIER1,ZMYM4,PRRG3,ZNF790,SKA3,MYEF2,ELK1,TMEM127,A…	1053
Cellular Assembly and Organization, Cellular Function and Maintenance	maintenance	maintenance of telomeres	0.00115					DNA2,POT1,ERCC4,TERF2,RAD50,SP100,CTC1,TPP2,MRE11,SMG6,TERF1,TINF2,RPA1,SMG1,APEX1	15
Cancer, Gastrointestinal Disease, Organismal Injury and Abnormalities	gastric cancer	gastric cancer	0.00117					DNA2,CORO1A,LAMC3,KIAA1217,FAM135B,DPP6,CCDC25,DPAGT1,TMEM196,RTN2,COL1A1,NEUROD4,TESPA1,PI3,LILRB4,DERL2,LRIG1,USP6NL,BACE2,BCL10,ARID1B,SLCO5A1,CEP63,SCUBE1,YIPF1,KYNU,TOP2A,C9orf84,ZBED1,SIAH2,HSP90B1,TM2D3,KCNJ4,ADAMTS10,DHX33,RFX5,TBC1D23,AR,WDR55,TAP2,DNAH5,CRTC1,TCERG1L,CASP5,TP73,ZNF423,IQSEC2,FYCO1,TPO,ZNF217,TMEM97,KIAA2022,ERCC1,WNT5A,MCM7,PTCH1,ELAVL3,FOXP1,HPSE,TNRC6C,C17orf74,MAGI2,…	378
Tissue Development	growth	growth of epithelial tissue	0.00125					AGER,PBLD,ADORA2A,C3,LAMC1,KLK3,F2R,PDCL3,DICER1,BMP4,C5AR1,PEX2,SMAD3,ZFP36L1,ATP5A1,TGFBR1,POMC,SOX2,TLR2,VEGFC,COL4A1,FABP4,RCAN1,MED1,TRPM7,SEMA6A,ENG,SDR16C5,CASR,CCL11,VASH1,TIMP2,EGFL7,PTPN1,BMPR2,EPO,CDKN1B,NRP1,STX6,BCLAF1,SERPINE1,HRH2,GBP1,CXCL12,CSNK1A1,F2RL1,MYDGF,WNT5A,HIPK1,SYNJ2BP,IL6,TP53,IL11,FN1,DLC1,CDKN1A,MET,ITGB3,PRKD2,FOXO1,NANOG,CDH13,ZG16B,MAP3K7,PLXNB3,ZNF304,HPN,PDE2A,…	86
Gastrointestinal Disease, Hepatic System Disease, Organismal Injury and Abnormalities	liver lesion	liver lesion	0.00126					GTF2B,PAOX,RIC8A,CCL8,KIAA1217,TESPA1,TTC29,KLF14,AMER3,SORL1,MTO1,LUZP2,CDRT1,TOP2A,HDX,SEMA5B,AMFR,ASAP2,SAMD9L,SEMA4B,LRRN4CL,DENND2A,TCERG1L,TMCC3,TTC28,KIAA0355,RASGRF1,PLA2G4E,SLCO4A1,IFNLR1,HOXA4,AGK,NLRP10,CCDC40,ZNF280D,DCN,STRIP1,CDH13,AMOT,VMA21,PSTPIP2,NASP,HOXD12,CEP44,ZBTB17,ARMC5,MXD3,TM9SF4,SKIDA1,NPLOC4,FAM46A,MASP1,RNF220,CHDH,NCKAP1L,OSBPL11,RGS4,LONRF2,MIER1,ZMYM4,PRRG3,ZNF790…	1121
Cancer, Gastrointestinal Disease, Organismal Injury and Abnormalities	stomach tumor	stomach tumor	0.00127					DNA2,CORO1A,LAMC3,KIAA1217,FAM135B,DPP6,CCDC25,DPAGT1,TMEM196,RTN2,COL1A1,NEUROD4,TESPA1,PI3,LILRB4,DERL2,LRIG1,USP6NL,BACE2,BCL10,ARID1B,SLCO5A1,CEP63,SCUBE1,YIPF1,KYNU,TOP2A,C9orf84,ZBED1,SIAH2,HSP90B1,TM2D3,KCNJ4,ADAMTS10,DHX33,RFX5,TBC1D23,AR,WDR55,TAP2,DNAH5,CRTC1,TCERG1L,CASP5,TP73,ZNF423,IQSEC2,FYCO1,TPO,ZNF217,TMEM97,KIAA2022,ERCC1,WNT5A,MCM7,PTCH1,ELAVL3,FOXP1,HPSE,TNRC6C,C17orf74,MAGI2,…	380
Cancer, Gastrointestinal Disease, Hepatic System Disease, Organismal Injury and Abnormalities	liver tumor	liver tumor	0.00128					GTF2B,PAOX,RIC8A,KIAA1217,TESPA1,TTC29,KLF14,AMER3,SORL1,MTO1,LUZP2,CDRT1,TOP2A,HDX,SEMA5B,AMFR,ASAP2,SAMD9L,SEMA4B,LRRN4CL,DENND2A,TCERG1L,TMCC3,TTC28,KIAA0355,RASGRF1,PLA2G4E,SLCO4A1,HOXA4,AGK,NLRP10,CCDC40,ZNF280D,DCN,STRIP1,CDH13,AMOT,VMA21,PSTPIP2,NASP,HOXD12,CEP44,ZBTB17,ARMC5,MXD3,TM9SF4,SKIDA1,NPLOC4,FAM46A,MASP1,RNF220,CHDH,NCKAP1L,OSBPL11,RGS4,LONRF2,MIER1,ZMYM4,PRRG3,ZNF790,SKA3,MYEF2,…	1099
Cancer, Endocrine System Disorders, Gastrointestinal Disease, Organismal Injury and Abnormalities	pancreatic cancer	pancreatic cancer	0.00131					ROPN1B,DNA2,PAOX,RNF219,VWA2,TERF2,NTSR1,PYHIN1,MIA3,TESPA1,NDE1,LILRB4,AMER1,AMER3,RPA1,SLITRK3,IGFN1,TOP2A,ABTB2,SEMA5B,CPN2,AMFR,PABPC1,CCL11,UBE2G1,PCMTD2,GPR83,ANP32E,SYT17,ATP10A,THNSL1,TGM4,DENND2A,TCERG1L,ZNF423,GNPTG,CTH,TSPEAR,RASGRF1,ENOPH1,ASB12,MAGI2,IL6,SIK2,R3HDM2,C19orf44,GREB1,TPRG1,FIBCD1,SIN3A,STRIP1,AMOT,FIGNL1,PSTPIP2,NPC1L1,LPP,PTPN3,TM9SF4,TRIM56,MASP1,CELF2,DPY19L1,SLC47A1…	583
Cardiovascular System Development and Function, Cellular Movement	cell movement	cell movement of endothelial cells	0.00133					KLK3,GATA3,KLHL20,F2R,ARHGEF6,DICER1,BMP4,NOS3,TGFBR1,VEGFC,EFNB1,COL4A1,MAPKAPK5,ALCAM,RCAN1,SP100,TRPM7,PRKG1,ENG,CCL11,TDGF1,VASH1,TIMP2,OLR1,BMPR2,EPO,SLIT2,CDKN1B,NRP1,STX6,SERPINE1,CXCL12,F2RL1,SEMA3E,WNT5A,FOXP1,DGKE,FN1,DLC1,MET,DCN,ITGB3,CRK,PRKD2,FOXO1,ANGPT4,CXXC5,CDH13,AMOT,ZG16B,MAP3K7,PDGFRB,CCL1,PDE2A,ITGA9,KLF2,NDP,ANGPTL1,CHGA,LOXL2,THBD,PRKCA,HIF1A,HSPA5,TIMP3,PLCG1,LEP,AXL,PTP4…	69
Cancer, Cellular Movement, Organismal Injury and Abnormalities	invasion	invasion of endothelial cells	0.00139					GBP1,CHGA,THBD,SP100,KLK3,CCL1,RGS4,VEGFC,TIMP2	9
Cancer, Gastrointestinal Disease, Organismal Injury and Abnormalities	colorectal cancer	colorectal cancer	0.00144					GTF2B,PPP2R5E,NTSR1,TMEM43,RTN2,TTC29,USP6NL,AMER3,SORL1,LUZP2,TOP2A,SEMA5B,ASAP2,KCNJ4,SAMD9L,GPR83,DENND2A,TCERG1L,TMEM239,SLC35D2,TTC28,TMEM97,KIAA0355,RASGRF1,PLA2G4E,MRGPRF,CTCFL,CCL16,MESP1,HIC2,NLRP10,GTF2F1,CCDC40,ALDH1L2,ZNF280D,ATXN7,CDH13,AMOT,ZNF154,CD3G,PSTPIP2,HOXD12,BAG1,ZBTB17,ARMC5,MXD3,TM9SF4,SKIDA1,NPLOC4,FAM46A,MASP1,RAB3A,RASD2,SH3RF2,RGS4,LONRF2,ZMYM4,PRRG3,C11orf57,STOX2,LM…	1259
Cellular Assembly and Organization, Cellular Function and Maintenance	organization	organization of cytoskeleton	0.00145					AGER,CORO1A,CNTN4,MAP6D1,TNFRSF1A,FAM107A,LIMK1,EFNA5,ARAP1,CLRN1,CFAP20,WTIP,ARPC5,F2R,OCRL,DNMBP,PARD6B,EMP2,PIP5K1C,FES,POMC,PSRC1,EFNB1,MAPKAPK5,CCL11,DPYSL2,TMEM216,GAS2L3,SSH1,AR,GDNF,LMCD1,DNAJA3,DNAH5,NRP1,MYLK,WHAMM,ARHGEF9,FAS,RHOU,AMIGO1,TUBGCP6,CXCL12,RNF19A,ARHGAP44,EPHA3,CRMP1,DZIP1L,IL6,HOXA4,TP53,BTG2,FN1,DLC1,ATXN7,MAP1A,CRK,STRIP1,KLHL42,WNT3A,NANOG,CDH13,AMOT,PDGFRB,SPATA13,GRK…	173
Cancer, Organismal Injury and Abnormalities	tumorigenesis	tumorigenesis of adenocarcinoma	0.00149					KIAA1217,CERCAM,WTIP,DCAF16,NKX2-1,AMER3,TOP2A,TRPM7,KCNJ4,SAMD9L,CTNNAL1,LYZ,FAM105A,ATP10A,THNSL1,RALBP1,NRP1,GNLY,COMMD8,GTF2IRD1,UFSP2,KIAA0355,PTX4,SLCO4A1,ELAVL3,MAGI2,IL6,SIK2,R3HDM2,AGK,GREB1,FAM69A,TPRG1,TSPAN5,SIN3A,PCDH17,STRIP1,ATF7IP2,PNLIPRP1,CEACAM7,PSTPIP2,NASP,NPC1L1,C3orf67,OTUD4,BAG1,PTPN3,PDE2A,WSCD2,NCAM1,GART,DPY19L1,CAMSAP1,SLC47A1,SH3RF2,LONRF2,C9orf3,ZNF790,EXT1,VRTN,MYEF…	566
Cancer, Organismal Injury and Abnormalities	genitourinary carcinoma	genitourinary carcinoma	0.00151					PAOX,TMEM11,RIC8A,S100Z,KIAA1217,CERCAM,DCAF16,USP6NL,AMER3,SORL1,MTO1,MMAA,CDRT1,C1orf106,TOP2A,HDX,SENP5,KCNK17,TM2D3,KCNJ4,SAMD9L,FAM105A,DENND2A,GNLY,PHLDA3,TMCC3,TTC28,KIAA0355,ASB12,TMUB2,AGK,C19orf44,NLRP10,DCN,STRIP1,ATF7IP2,CDH13,PSTPIP2,NASP,BAG1,CEP44,ZBTB17,SKIDA1,MASP1,RNF220,SLC47A1,SH3RF2,RGS4,LONRF2,NR6A1,ZNF790,C11orf57,STOX2,IPO11,SKA3,TMEM127,RRM2,GGCX,SMG6,ABCC6,BCOR,NR0B1,KAN…	1126
Cancer, Hematological Disease, Immunological Disease, Organismal Injury and Abnormalities	adult T cell leukemia	adult T cell leukemia	0.00163					CCR7,CSNK1A1,ZNF835,TP53,GATA3,RRM2,DHFR,PDE7B,JARID2,VMP1,CD4,CCR4,CD86,TRRAP,POT1,TOP2A,POLE4,CD58,CD5,HSP90B1,IKBKB,B2M,RRM1,CD28,PLCG1,FAS,ATXN1	27
Cell Morphology, Cell-To-Cell Signaling and Interaction	morphology	morphology of focal adhesions	0.00167					PAK2,PAK1,MGAT5,ACTN4,NCKIPSD,AKT2,TP53,SLC12A2	8
Cellular Assembly and Organization, Cellular Function and Maintenance, Cellular Movement, Molecular Transport, Nervous System Development and Function	exocytosis	exocytosis of synaptic vesicles	0.00168					SNAP25,VAMP2,DNAJC5,RIMS1,PIP5K1C	5
Cancer, Organismal Injury and Abnormalities	urogenital cancer	urogenital cancer	0.00171					PAOX,TMEM11,RIC8A,S100Z,KIAA1217,CERCAM,DCAF16,USP6NL,AMER3,SORL1,MTO1,MMAA,CDRT1,C1orf106,TOP2A,HDX,SENP5,KCNK17,AMFR,TM2D3,KCNJ4,SAMD9L,RPS6KC1,FAM105A,DENND2A,GNLY,PHLDA3,TMCC3,TTC28,KIAA0355,MRGPRF,ASB12,TPM4,TMUB2,HOXA4,C16orf45,AGK,C19orf44,NLRP10,DCN,STRIP1,ATF7IP2,CDH13,PSTPIP2,NASP,BAG1,CEP44,ZBTB17,SKIDA1,MASP1,RNF220,GSDMB,SLC47A1,SH3RF2,RGS4,LONRF2,NR6A1,ZNF790,C11orf57,STOX2,IPO11,SK…	1240
Infectious Diseases	infection	Viral Infection	0.00174					CCR7,PPP2R5E,PIWIL3,LAMC3,TERF2,KLF15,CHRNA10,TNFRSF1A,SELL,HID1,RTN2,ENGASE,FLOT2,CLEC4G,SMU1,CHMP1A,CSE1L,CYYR1,ZC3H7B,PIP5K1C,NUDCD3,MRPL10,TOP2A,ERICH6B,NECTIN1,SEMA5B,SENP5,RBM7,HSP90B1,CCL11,DHX33,TAT,BECN1,AR,PSMD12,NECAB3,FABP1,DNAJA3,TP73,APOA1,VPS28,BCLAF1,PCBP2,FAS,CHST6,ERCC1,FBXO24,NUP62,EPN2,PADI4,NLRC5,IFNLR1,KDM4D,IL6,SLC22A11,RAB5C,BTG2,PDE7B,MAP1A,MVB12B,WWP2,HTR2A,PARP12,ZNF785…	375
Cardiovascular Disease, Hereditary Disorder, Organismal Injury and Abnormalities	familial cardiovascular disease	familial cardiovascular disease	0.0018					PTEN,TMEM43,LIMK1,DPP6,SH3PXD2B,HTRA1,JPH2,GPD1L,TBX20,GHR,SMAD3,MYH11,TMPO,TGFBR1,SCN3B,F2,COL4A1,MED13L,PRKG1,ADRA2B,BMPR2,VHL,APOB,SLC6A3,PRNP,EIF2AK4,MYLK,APOA1,KCNJ5,FAS,FBN2,APOC3,KCNK3,PDLIM3,LDLR,FKTN,ECE1,PPP1R17,TPM1,TXNRD2,EIF4EBP1,CACNA1D,ADRA1A,HTR2A,PSEN1,SHOC2,PDGFRB,HEY2,MYL2,NPC1L1,ADRB1,ANK2,KCNE1,HCN4,B4GALT7,SLC2A10,NEBL,CACNA1C,SCNN1B,RPS6KA1,RYR2,ATXN1,MEF2A	63
Cellular Development, Cellular Growth and Proliferation	proliferation	proliferation of lymphoblastoid cell lines	0.00184					CDH13,MAP4K4,C4orf45,INPP5F,FANCC,PIK3R1,NFKBIA,MGMT,FKBP5,GHR,SPHKAP,CDKN1A,RANBP17,RUNX3,LUZP2,ARL2BP,KIF1A,CASP2,CENPB,TRRAP	20
Cancer, Dermatological Diseases and Conditions, Hematological Disease, Immunological Disease, Inflammatory Disease, Inflammatory Response, Organismal Injury and Abnormalities	large cell transformed mycosis fungoides	large cell transformed mycosis fungoides	0.00191					RRM2,TOP2A,RRM1,DHFR,POLE4,FPGS,TNFRSF8	7
Cancer, Hematological Disease, Immunological Disease, Organismal Injury and Abnormalities	non-Sezary/visceral disease	non-Sezary/visceral disease	0.00191					RRM2,TOP2A,RRM1,DHFR,POLE4,FPGS,TNFRSF8	7
Cell Morphology, Cellular Assembly and Organization, Cellular Function and Maintenance	extension	extension of cellular protrusions	0.00199					AGER,F2RL1,CTTN,CRKL,PDGFRA,LIMK1,PPP3CB,IL6,PLXNB1,LMCD1,F2R,CYFIP1,MACF1,CRK,WNT3A	15
Cellular Assembly and Organization, Cellular Function and Maintenance	organization	organization of cytoplasm	0.00216					AGER,CORO1A,TMEM11,TNFRSF1A,FAM107A,WTIP,USP6NL,DNMBP,PIP5K1C,FES,EFNB1,CCL11,DPYSL2,SSH1,AR,GDNF,DNAJA3,DNAH5,NRP1,WHAMM,ARHGEF9,FAS,RHOU,AMIGO1,ARHGAP44,EPHA3,IL6,HACE1,HOXA4,BTG2,ATXN7,MAP1A,STRIP1,KLHL42,WNT3A,NANOG,CDH13,AMOT,ARFGEF1,GRK4,TOR1A,MICAL3,NPLOC4,NCAM1,NCKAP1L,CAMSAP1,CSF1,CETN2,ZMYM4,PTEN,RALB,CYFIP1,ACTN4,BDNF,ESR1,AVIL,PDGFRA,CLTC,PRKG1,ENG,TMED2,VHL,SLIT2,PRNP,STMN3,ARHGEF2,O…	197
Gene Expression, RNA Damage and Repair, RNA Post-Transcriptional Modification	stabilization	stabilization of mRNA	0.0025					AXIN2,GDNF,MAP3K7,LARP1,ZFP36L1,PABPC1,TAB1,PUM1,YTHDF2,APEX1	10
Infectious Diseases	infection	infection of cells	0.00262					PPP2R5E,PIWIL3,LAMC3,TERF2,HID1,RTN2,ZC3H7B,PIP5K1C,MRPL10,ERICH6B,NECTIN1,SEMA5B,SENP5,RBM7,HSP90B1,DHX33,PSMD12,NECAB3,FABP1,BCLAF1,PCBP2,FAS,ERCC1,NUP62,EPN2,KDM4D,RAB5C,BTG2,HTR2A,ZNF785,SHCBP1,CEACAM7,HLA-DOA,FCF1,ASXL2,CD58,STAU1,KLF2,IGF2R,MICAL3,TRIM56,POU6F1,RAB3A,LTB4R,TLR3,BMP1,CSF1,APOBEC3F,LSM3,AEBP2,PFKL,ARID5A,C3,GABPB2,VWC2L,MYEF2,BICD2,RANBP1,TMEM127,PSMC4,RALB,SSR3,CAD,EXOSC3,UB…	198
Cancer, Hematological Disease, Immunological Disease, Organismal Injury and Abnormalities	adult leukemia	adult leukemia	0.00287					CCR7,CSNK1A1,ZNF835,CSF3R,PPP3CC,TP53,GATA3,RRM2,DHFR,PDE7B,JARID2,RXRA,VMP1,CD4,CCR4,CD86,TRRAP,POT1,TOP2A,PDGFRB,POLE4,PDGFRA,CD58,CD5,HSP90B1,PPP3CB,TXNRD1,IKBKB,B2M,RRM1,CD28,PLCG1,FAS,PRIM1,ATXN1,DDR2	36
Cellular Assembly and Organization, Cellular Function and Maintenance	organization	microtubule dynamics	0.00288					AGER,CNTN4,MAP6D1,TNFRSF1A,FAM107A,LIMK1,EFNA5,ARAP1,CLRN1,CFAP20,F2R,OCRL,DNMBP,PARD6B,FES,POMC,PSRC1,DPYSL2,TMEM216,GAS2L3,AR,GDNF,LMCD1,DNAH5,MYLK,WHAMM,ARHGEF9,FAS,AMIGO1,TUBGCP6,CXCL12,RNF19A,ARHGAP44,EPHA3,CRMP1,DZIP1L,IL6,HOXA4,TP53,BTG2,FN1,ATXN7,MAP1A,CRK,KLHL42,WNT3A,NANOG,CDH13,PDGFRB,SPATA13,GRK4,SREBF1,CDC42EP4,MYL2,PAK1,TOR1A,TXNRD1,FER,NCAM1,CAMSAP1,FUZ,CSF1,MACF1,KIF18B,SNAP29,CET…	132
Nervous System Development and Function	fasciculation	fasciculation	0.00289					AR,CNTN4,SLIT2,AMIGO1	4
Cancer, Cardiovascular Disease, Dermatological Diseases and Conditions, Developmental Disorder, Hereditary Disorder, Neurological Disease, Organismal Injury and Abnormalities	von Hippel-Lindau syndrome	von Hippel-Lindau syndrome	0.00289					VHL,PTEN,RPS6KA1,EIF4EBP1	4
Cancer, Organismal Injury and Abnormalities	pelvic cancer	pelvic cancer	0.00294					PAOX,TMEM11,RIC8A,S100Z,KIAA1217,CERCAM,DCAF16,AMER3,SORL1,MTO1,LUZP2,MMAA,CDRT1,C1orf106,TOP2A,HDX,SENP5,KCNK17,AMFR,TM2D3,KCNJ4,SAMD9L,RPS6KC1,FAM105A,DENND2A,PHLDA3,TMEM239,TMCC3,TTC28,KIAA0355,MRGPRF,ASB12,TPM4,TMUB2,HOXA4,C16orf45,AGK,C19orf44,NLRP10,GTF2F1,DCN,STRIP1,ATF7IP2,CDH13,NASP,CEP44,ZBTB17,ARMC5,SKIDA1,FAM46A,MASP1,RNF220,GSDMB,SH3RF2,RGS4,NR6A1,ZNF790,C11orf57,STOX2,IPO11,SKA3,SLC…	1165
Gene Expression	repression	repression of RNA	0.00298					GTF2B,MECP2,ZBTB16,PAX9,IL6,TP53,BCAT2,MAFG,BCOR,ESR1,TAF1,SKIL,RCOR1,ERCC2,DR1,PAK1,ING1,AR,RBBP8,MXI1,SHOX,HIF1A,SAP130,NSD2,GTF2IRD1,KDM5B	26
Cancer, Organismal Injury and Abnormalities, Reproductive System Disease	female genital tract cancer	female genital tract cancer	0.00308					PAOX,TMEM11,RIC8A,S100Z,KIAA1217,CERCAM,DCAF16,AMER3,SORL1,MMAA,CDRT1,C1orf106,TOP2A,HDX,SENP5,KCNK17,KCNJ4,SAMD9L,FAM105A,DENND2A,PHLDA3,TMCC3,TTC28,KIAA0355,MRGPRF,ASB12,TPM4,TMUB2,HOXA4,C16orf45,AGK,NLRP10,DCN,STRIP1,ATF7IP2,CDH13,CEP44,ZBTB17,SKIDA1,MASP1,RNF220,GSDMB,SH3RF2,RGS4,NR6A1,ZNF790,C11orf57,STOX2,SKA3,SLC16A3,TMEM127,RRM2,SMG6,ABCC6,BCOR,NR0B1,KANK3,UBE2QL1,NOP14,SLC2A2,BDH1,LRRC27…	963
Cardiovascular Disease, Gastrointestinal Disease, Hematological Disease, Hepatic System Disease, Organismal Injury and Abnormalities	Budd-Chiari syndrome	Budd-Chiari syndrome	0.00325					PDGFRB,COL4A1,THBD,PDGFRA,F3,F5,IL6,VEGFC,F2	9
Cancer, Neurological Disease, Organismal Injury and Abnormalities	medulloblastoma SHH subtype	medulloblastoma SHH subtype	0.00325					LDB1,SUFU,PPM1D,PTEN,PTCH1,ARID1B,BCOR,GABRG1,TP53	9
Developmental Disorder, Neurological Disease	neural tube defect	neural tube defect	0.00325					VANGL2,AR,MTR,DHFR,MTHFD1L,SNAP25,FUZ,MTHFR,ESR1	9
Cancer, Organismal Injury and Abnormalities	tumorigenesis	tumorigenesis of head and neck tumor	0.00325					GLTSCR2,VHL,LOXL2,PTCH1,CDKN1A,CSF3R,H3F3A/H3F3B,CYP51A1,TP53	9
Cardiovascular Disease, Organismal Injury and Abnormalities, Organismal Survival	sudden cardiac death	sudden cardiac death	0.00329					GPD1L,NEBL,DPP6,CACNA1C,ANK2,SCN3B,RYR2	7
Cancer, Organismal Injury and Abnormalities	cancer of head	cancer of head	0.00337					LPAR1,CCL8,TERF2,LIMK1,DPAGT1,COL1A1,BMP4,ARID1B,TAF1,AKAP1,DCBLD2,TOP2A,HSP90B1,H3F3A/H3F3B,GDF10,CCL11,LY75,LDB1,RRM1,TP73,GNAI1,CXCL12,PDGFD,TBR1,PTCH1,ASB5,IL6,TP53,MGMT,TSHZ1,FN1,DCN,NANOG,CDH13,FRRS1,ADRB1,BAG1,GBP2,RAD1,EEF2K,CILP,PYCARD,ING4,NCAM1,CTSH,GART,KDM1A,THBD,TGIF1,CYP51A1,ZNF346,PPM1D,PTEN,CSF3R,CPXM2,MYCL,MALT1,RRM2,MAP7,DICER1,BCOR,SOX2,VEGFC,POT1,KRT7,COL4A1,CALB2,ADRA2B,EPHB…	107
Cellular Assembly and Organization, Cellular Compromise	formation	formation of cellular inclusion bodies	0.00363					HSPA2,BAG5,DNAJB1,SIAH2,ARX,PSMC4,KRT18,AR,HAP1,ATXN7,ATXN1,TARDBP,PSEN1	13
Cancer, Hematological Disease, Immunological Disease, Organismal Injury and Abnormalities	prolymphocytic leukemia	prolymphocytic leukemia	0.00363					TOP2A,MTCP1,CD5,PPP3CB,GBP2,PPP3CC,TP53,RRM2,RRM1,CD4,PRIM1,ATXN1,CIITA	13
Cellular Development, Cellular Function and Maintenance, Connective Tissue Development and Function	adipogenesis	adipogenesis of tumor cell lines	0.00388					LPIN1,SREBF1,HSPA5,FMO3,TRA2B	5
Hematological System Development and Function	hemostasis	hemostasis	0.0041					CXCL12,CD59,ADORA2A,F2RL1,C3,STX2,DGKE,IL6,SPINT2,SCARA5,F2R,GGCX,FN1,ITGB3,NOS3,BLOC1S3,TLR2,F2,PLPP1,EFNB1,PDGFRA,LMAN1,ANXA5,BDKRB2,F5,FAM46A,CCL22,THBD,CLEC4M,SELPLG,F3,JAM3,PROCR	33
Cellular Assembly and Organization	accumulation	accumulation of actin filaments	0.00413					LMCD1,FXYD5,PLD1	3
Cell-To-Cell Signaling and Interaction, Cellular Assembly and Organization, Tissue Development	adhesion	adhesion of fibronectin matrix	0.00413					VCAN,RBM17,SS18	3
Cancer, Cell Cycle, Organismal Injury and Abnormalities	G1 phase	arrest in G1 phase of cancer cells	0.00413					PTEN,CDKN1A,DCN	3
Cancer, Endocrine System Disorders, Organismal Injury and Abnormalities, Reproductive System Disease	benign neoplasm of epididymis	benign neoplasm of epididymis	0.00413					PTEN,RPS6KA1,EIF4EBP1	3
Cell Morphology, Cellular Assembly and Organization, Cellular Development, Cellular Function and Maintenance, Cellular Growth and Proliferation, Embryonic Development, Nervous System Development and Function, Organismal Development, Tissue Development	branching	branching of axons	0.00413					SLIT2,EFNA5,BDNF	3
Cell Cycle	G1/S phase transition	delay in G1/S phase transition of cervical cancer cell lines	0.00413					NASP,PHF8,SNX33	3
Cell Morphology, Cellular Function and Maintenance	depolarization	depolarization of tumor cell lines	0.00413					FAS,SCN11A,BDNF	3
Cellular Assembly and Organization	generation	generation of lamellipodia	0.00413					SSH1,CXCL12,LIMK1	3
Cancer, Organismal Injury and Abnormalities, Reproductive System Disease	hyperplasia	hyperplasia of breast	0.00413					CSF1,TP53,ESR1	3
Cancer, Cell Cycle, Organismal Injury and Abnormalities	interphase	interphase of carcinoma cells	0.00413					PTEN,CDKN1A,DCN	3
Organismal Injury and Abnormalities	bleeding	major bleeding	0.00413					F2R,CYP2C19,F2	3
Cancer, Dermatological Diseases and Conditions, Developmental Disorder, Hematological Disease, Immunological Disease, Organismal Injury and Abnormalities	mucosa associated lymphoid tissue lymphoma of skin	mucosa associated lymphoid tissue lymphoma of skin	0.00413					MALT1,BCL10,FOXP1	3
Developmental Disorder, Neurological Disease, Organismal Injury and Abnormalities	neonatal encephalopathy	neonatal encephalopathy	0.00413					EPO,MECP2,PNPO	3
Infectious Diseases	production	production of hepatitis B virus	0.00413					ATG5,ST13,BECN1	3
Cellular Development, Cellular Growth and Proliferation, Embryonic Development, Organismal Development, Tissue Development	proliferation	proliferation of trophoblast cells	0.00413					F2R,KCNIP3,F2	3
Nervous System Development and Function, Tissue Morphology	size	size of nervous tissue	0.00413					OXTR,GDNF,BDNF	3
Cancer	transformation	transformation of brain cancer cell lines	0.00413					CRK,SIRPA,TP53	3
Infectious Diseases	infection	infection by RNA virus	0.00442					CCR7,PPP2R5E,PIWIL3,LAMC3,TERF2,CHRNA10,HID1,RTN2,ZC3H7B,PIP5K1C,MRPL10,TOP2A,ERICH6B,SEMA5B,SENP5,RBM7,HSP90B1,CCL11,DHX33,AR,PSMD12,NECAB3,FABP1,APOA1,BCLAF1,PCBP2,FAS,ERCC1,NUP62,EPN2,IFNLR1,KDM4D,IL6,SLC22A11,RAB5C,BTG2,PDE7B,ZNF785,SHCBP1,CEACAM7,HLA-DOA,FCF1,ASXL2,NPC1L1,STAU1,KLF2,MICAL3,TRIM56,POU6F1,RAB3A,LTB4R,TLR3,BMP1,CSF1,LEP,LSM3,AEBP2,PFKL,ARID5A,ADORA2A,C3,GABPB2,CSF3R,VWC2L,MYEF2…	227
Cancer, Organismal Injury and Abnormalities, Reproductive System Disease	female genital neoplasm	female genital neoplasm	0.00443					PAOX,TMEM11,RIC8A,S100Z,KIAA1217,NTSR1,CERCAM,DCAF16,AMER3,SORL1,MMAA,CDRT1,C1orf106,TOP2A,HDX,SENP5,KCNK17,KCNJ4,SAMD9L,FAM105A,DENND2A,PHLDA3,TMCC3,TTC28,KIAA0355,MRGPRF,ASB12,TPM4,TMUB2,HOXA4,C16orf45,AGK,NLRP10,DCN,STRIP1,ATF7IP2,CDH13,CEP44,ZBTB17,SKIDA1,MASP1,RNF220,GSDMB,SH3RF2,RGS4,NR6A1,ZNF790,C11orf57,STOX2,SKA3,SLC16A3,TMEM127,RRM2,SMG6,ABCC6,BCOR,NR0B1,KANK3,UBE2QL1,NOP14,SLC2A2,BDH1,…	995
Cellular Assembly and Organization	transport	transport of vesicles	0.00447					ITSN1,SNAP25,VAMP2,DNAJC5,TOR1A,RIMS1,PPP3CC,COG3,MYO5A,STON2,APOA1,PIP5K1C,ACTN4,SPG11	14
Cancer, Hematological Disease, Organismal Injury and Abnormalities	lymphocytic neoplasm	lymphocytic neoplasm	0.00448					CCR7,SIGLEC10,LPAR1,CCL8,SELL,RTN2,COL1A1,FNDC1,CLEC4G,CSE1L,LRIG1,KLF14,BCL10,AMER3,ARID1B,IL1RL2,RPA1,HDAC11,CORO2A,KPNA1,TOP2A,USP22,SEMA5B,RBM7,HSP90B1,CLMP,ASAP2,DUSP2,ATP10A,DNAH5,NRP1,TP73,ZNF423,FCMR,DSC3,FAS,RHOU,TPO,KIAA2022,RASGRF1,ZNF835,FOXP1,TNRC6C,CLEC17A,EPHA3,MAGI2,IL6,ZNF37A,R3HDM2,GREB1,ZNF490,BTG2,RTTN,ADAMTS15,ALDH1L2,PDE7B,ARID5B,PCDH17,PRKD2,ANKRD40,KLHL42,HTR2A,AMOT,CD3G,O…	349
Cancer, Organismal Injury and Abnormalities	pelvic tumor	pelvic tumor	0.00452					PAOX,TMEM11,RIC8A,S100Z,KIAA1217,CERCAM,DCAF16,AMER3,SORL1,MTO1,LUZP2,MMAA,CDRT1,C1orf106,TOP2A,HDX,SENP5,KCNK17,AMFR,TM2D3,KCNJ4,SAMD9L,RPS6KC1,FAM105A,DENND2A,PHLDA3,TMEM239,TMCC3,TTC28,KIAA0355,MRGPRF,ASB12,TPM4,TMUB2,HOXA4,C16orf45,AGK,C19orf44,NLRP10,GTF2F1,DCN,STRIP1,ATF7IP2,CDH13,NASP,CEP44,ZBTB17,ARMC5,SKIDA1,FAM46A,MASP1,RNF220,GSDMB,SH3RF2,RGS4,NR6A1,ZNF790,C11orf57,STOX2,IPO11,SKA3,SLC…	1166
Cancer, Organismal Injury and Abnormalities, Reproductive System Disease	tumorigenesis	tumorigenesis of reproductive tract	0.00453					PAOX,TMEM11,RIC8A,S100Z,KIAA1217,NTSR1,CERCAM,DCAF16,AMER3,SORL1,MMAA,CDRT1,C1orf106,TOP2A,HDX,SENP5,KCNK17,KCNJ4,SAMD9L,FAM105A,DENND2A,PHLDA3,TMCC3,TTC28,KIAA0355,MRGPRF,ASB12,TPM4,TMUB2,HOXA4,C16orf45,AGK,NLRP10,DCN,STRIP1,ATF7IP2,CDH13,CEP44,ZBTB17,SKIDA1,MASP1,RNF220,GSDMB,SH3RF2,RGS4,NR6A1,ZNF790,C11orf57,STOX2,SKA3,SLC16A3,TMEM127,RRM2,SMG6,ABCC6,BCOR,NR0B1,KANK3,UBE2QL1,NOP14,SLC2A2,BDH1,…	994
Cardiovascular System Development and Function, Cellular Movement	migration	migration of vascular endothelial cells	0.00468					CXCL12,F2RL1,SEMA3E,KLK3,DGKE,KLHL20,F2R,FN1,ARHGEF6,DICER1,DLC1,MET,ITGB3,FOXO1,CXXC5,CDH13,ZG16B,MAP3K7,MAPKAPK5,RCAN1,SP100,PRKG1,PDE2A,ITGA9,KLF2,VASH1,TIMP2,NDP,CHGA,SLIT2,THBD,CDKN1B,HIF1A,NRP1,HSPA5,STX6,LEP	37
Dermatological Diseases and Conditions, Immunological Disease, Organismal Injury and Abnormalities	angioedema	angioedema	0.00501					AR,XPNPEP2,ADRB1,ADRA2B,BDKRB2,C1S,SERPING1,ESR1,ADRA1A,HTR2A,MS4A2	11
Gene Expression	activation	activation of DNA endogenous promoter	0.00503					FOXJ1,SUPT3H,KLF15,DCAF1,TNFRSF1A,RAX,POLR2F,ELF1,NFIC,ARNT2,GSC2,KLF14,NKX2-1,ZNF281,BMP4,POMC,TAF1,DR1,ZNF746,HDGF,SOX5,BATF3,CDX1,GREM1,AR,LDB1,GDNF,EPO,FOXE1,DNAJA3,FOXA1,CRTC1,GRHL2,YY1,TP73,FOXD3,SAP130,ZNF177,ZNF217,MYOCD,KLF13,GTF2H3,CREB1,WNT5A,CTCFL,PTCH1,ZBTB16,NLRC5,KLF12,KLF10,RBMX,IL6,ELK4,TP53,ARRB1,SNAI1,GCFC2,MESP1,SIN3A,DCN,MEF2B,NCOR1,CRK,ARID5B,PRKD2,WWP2,FOXO1,WNT3A,TARDBP,NA…	190
Cancer, Organismal Injury and Abnormalities	genitourinary tumor	genitourinary tumor	0.00519					PAOX,TMEM11,RIC8A,S100Z,KIAA1217,NTSR1,CERCAM,DCAF16,USP6NL,AMER3,SORL1,MTO1,MMAA,CDRT1,C1orf106,TOP2A,HDX,SENP5,KCNK17,AMFR,TM2D3,KCNJ4,SAMD9L,RPS6KC1,FAM105A,DENND2A,GNLY,PHLDA3,TMCC3,TTC28,KIAA0355,MRGPRF,ASB12,TPM4,TMUB2,HOXA4,C16orf45,AGK,C19orf44,NLRP10,DCN,STRIP1,ATF7IP2,CDH13,PSTPIP2,NASP,BAG1,CEP44,ZBTB17,SKIDA1,MASP1,RNF220,GSDMB,SLC47A1,SH3RF2,RGS4,LONRF2,NR6A1,ZNF790,C11orf57,STOX2,IP…	1264
Carbohydrate Metabolism, Lipid Metabolism, Small Molecule Biochemistry	dephosphorylation	dephosphorylation of phosphatidylinositol	0.00532					MTMR1,INPP5B,PTEN,INPP5F,TMEM55A,MTMR2,MTMR3	7
Cancer, Gastrointestinal Disease, Organismal Injury and Abnormalities	gastroesophageal cancer	gastroesophageal cancer	0.00563					DNA2,RNF219,KIAA1217,CCDC25,RTN2,TESPA1,PI3,LILRB4,TTC29,USP6NL,YIPF1,TOP2A,S100A7A,TM2D3,KCNJ4,RPS6KC1,WDR55,TAP2,WHAMM,TCERG1L,ZNF423,C11orf84,NXPH3,IQSEC2,FYCO1,TMEM97,ELAVL3,C17orf74,MAGI2,FFAR3,SIK2,HIC2,CCDC40,SIN3A,PCDH17,ANKRD40,IPCEF1,GRK4,CD3G,PSTPIP2,OAS2,PTPN3,PDE2A,WSCD2,EEF2K,SKIDA1,B4GALT7,NCAM1,GART,FTH1,EXT1,PTPN21,INMT,SCN3B,TMTC1,TTC14,PRR11,UMPS,C2CD3,CASR,TDGF1,ACVR1B,KNOP1,P…	461
Cancer, Organismal Injury and Abnormalities	endometrioid carcinoma	endometrioid carcinoma	0.00603					TMEM11,RIC8A,S100Z,KIAA1217,CERCAM,DCAF16,AMER3,SORL1,MMAA,CDRT1,C1orf106,TOP2A,HDX,SENP5,KCNK17,SAMD9L,FAM105A,DENND2A,TMCC3,TTC28,ASB12,TMUB2,AGK,NLRP10,DCN,STRIP1,ATF7IP2,CEP44,ZBTB17,SKIDA1,MASP1,RNF220,SH3RF2,RGS4,NR6A1,C11orf57,STOX2,SKA3,TMEM127,RRM2,SMG6,ABCC6,BCOR,NR0B1,UBE2QL1,NOP14,SLC2A2,BDH1,LRRC27,PPP1R9A,ZNF195,SLIT2,CABIN1,PICALM,SLC24A3,EDEM3,WBSCR22,ILVBL,SCLT1,KCNAB1,ERVW-1,GRI…	773
Cellular Movement	migration	migration of hepatoma cell lines	0.00615					GNAI1,CXCL12,PTEN,GALNT2,EFNA5,NR5A2,ELK1,MET,P2RY2,MGAT5,TMPO,HDGF,NTN1,PAK1,SLC2A1,AR,LMCD1,CTSH,PRKCA,CDKN1B,VCAN,PHACTR1,RAP1B,LEP,ZBTB7A	25
Lipid Metabolism, Small Molecule Biochemistry	dephosphorylation	dephosphorylation of phospholipid	0.00624					MTMR1,INPP5B,PTEN,INPP5F,TMEM55A,MTMR2,MTMR3,PLPP1	8
Cancer, Endocrine System Disorders, Organismal Injury and Abnormalities, Reproductive System Disease	adenosquamous ovarian cancer	adenosquamous ovarian carcinoma	0.00635					ZNF100,HOXC8,DPP6,CERCAM,NEUROD4,FOXO6,WTIP,OR7D2,LUC7L3,AMER3,PMFBP1,ZC3H7B,FES,KPNA1,TGFBRAP1,KRTAP4-2,ADAMTS10,FAM105A,THNSL1,DNAH5,NRP1,ARG2,BCLAF1,AKR1C1/AKR1C2,TPO,PTX4,ERCC1,ELAVL3,ABCC11,ARHGAP44,GRID1,EPHA3,PROSER3,MAGI2,POLR1D,AGK,ADCY2,NCOR1,ARID5B,PCDH17,SCN11A,WWP2,STRIP1,ATF7IP2,PNLIPRP1,CEACAM7,NPC1L1,GBP2,IGF2R,PHLDA1,NCAM1,LTB4R,SLC12A5,SH3RF2,SMG1,TAGAP,C9orf3,EXT1,ZDHHC14,CSF3R…	234
Infectious Diseases	infection	infection by Picornaviridae	0.00655					ARPC5,RAB3A,PICALM,CLTC,CD55,DCP1A	6
Cellular Movement	migration	migration of myeloma cell lines	0.00655					RALB,CXCL12,FN1,RALBP1,CD40,TP53	6
Cancer, Hematological Disease, Immunological Disease, Organismal Injury and Abnormalities	non-Sezary/visceral disease	stage IV non-Sezary/visceral disease	0.00655					RRM2,TOP2A,RRM1,DHFR,POLE4,FPGS	6
Cancer, Organismal Injury and Abnormalities	adenosquamous carcinoma	adenosquamous carcinoma	0.00661					ZNF100,HOXC8,DPP6,CERCAM,NEUROD4,FOXO6,WTIP,OR7D2,LUC7L3,AMER3,PMFBP1,ZC3H7B,FES,KPNA1,TGFBRAP1,TOP2A,KRTAP4-2,HSP90B1,ADAMTS10,FAM105A,THNSL1,DNAH5,NRP1,ARG2,BCLAF1,AKR1C1/AKR1C2,TPO,PTX4,ERCC1,ELAVL3,ABCC11,ARHGAP44,GRID1,EPHA3,PROSER3,MAGI2,POLR1D,AGK,ADCY2,NCOR1,ARID5B,PCDH17,SCN11A,WWP2,STRIP1,ATF7IP2,PNLIPRP1,CEACAM7,NPC1L1,GBP2,IGF2R,PHLDA1,NCAM1,LTB4R,SLC12A5,SH3RF2,SMG1,TAGAP,C9orf3,PTEN…	240
Cell Cycle	G1 phase	G1 phase of cervical cancer cell lines	0.00667					UBE3A,WNK2,NASP,TP73,PHF8,SNX33,NFKBIA,STK38,PSEN1	9
Cardiovascular Disease, Organismal Injury and Abnormalities	thoracic aortic dissection	thoracic aortic dissection	0.00667					EPO,SMAD3,SLC2A10,PRKG1,MYH11,MYLK,FBN2,TGFBR1,FAS	9
Cancer, Organismal Injury and Abnormalities	serous neoplasm	serous neoplasm	0.00675					FAM107A,DPP6,PI3,GALE,F2R,DCAF16,LRIG1,BCL10,NUCB1,ARID1B,MYH11,TAF1,TOP2A,EFNB1,DNAH7,HSP90B1,GDF10,KCNJ4,SPOCK2,CTNNAL1,AR,RRM1,DNAH5,SFRP4,VCAN,ZNF274,MYLK,GNAT1,GTF2IRD1,KIAA0355,CXCL12,PBRM1,ELAVL3,CLEC17A,ZBTB16,ABCC11,EPHA3,LMOD1,IL6,SIK2,TP53,INA,MS4A2,SPINT2,AXIN2,FN1,FAM69A,SIN3A,ADCY2,NCOR1,ARID5B,FZD3,PTGES,VGLL1,CASZ1,VAV3,PLPP1,CDH13,PDGFRB,POLE4,ARHGAP35,GYG1,LTA,OTUD4,LPP,B2M,CALC…	167
Cancer, Hereditary Disorder, Neurological Disease, Organismal Injury and Abnormalities	familial brain tumor syndrome	familial brain tumor syndrome	0.00678					VHL,PTEN,SLC6A3,PRKCA,CHEK2,RPS6KA1,TSC1,EIF4EBP1,TP53,MSH2	10
Tissue Morphology	quantity	quantity of cervical cancer cell lines	0.00678					DHFR,TTC19,TIMP3,NAT10,TXNRD1,ZBTB7A,NFKBIA,CCNB1,BECN1,VAV3	10
DNA Replication, Recombination, and Repair	excision repair	excision repair	0.00688					DNA2,ERCC1,ERCC2,ERCC4,EIF3A,TP53,RBBP8,LIG3,RAD23B,SMUG1,HUWE1,CDKN1A,ERCC8,RPA1,TDG,APEX1,FAN1,UVSSA,CETN2,USP47	20
Cellular Assembly and Organization, Cellular Function and Maintenance, Tissue Development	formation	formation of actin filaments	0.00688					S1PR2,HCK,CREB1,NPR1,GNAO1,TNS4,TPM4,GNG7,ARAP1,LMOD1,MYADM,ARRB1,F2R,FN1,TNS3,DLC1,CORO7/CORO7-PAM16,RBBP4,TPM2,KCTD13,TPM1,SIRPA,TSC1,SKIL,F2,AKAP1,SH3PXD2A,CXXC5,ARFGEF1,LIMK2,ARHGEF10,CTTN,PAK1,FER,CCL11,NCKIPSD,KLF2,AR,LMCD1,SLIT2,NCKAP1L,PHACTR1,NCK2,APOA1,GNG2,PAK4,CALD1	47
Cancer, Organismal Injury and Abnormalities, Reproductive System Disease	breast or ovarian cancer	breast or ovarian cancer	0.00706					ZNF799,NTSR1,PYHIN1,CERCAM,WTIP,DCAF16,AMER3,SORL1,IGFN1,TOP2A,NECTIN2,AMFR,KCNJ4,THEM4,RPS6KC1,CTNNAL1,GREM1,FAM105A,SYT17,WDR55,ATP10A,THNSL1,RALBP1,NRP1,CHST7,ZNF423,CCDC30,GTF2IRD1,TMEM97,KIAA0355,PTX4,ELAVL3,TPM4,NPC2,MAGI2,IL6,HOXA4,SIK2,AGK,ZNF114,GREB1,FKBP5,FAM69A,SIN3A,DCN,PCDH17,STRIP1,ATF7IP2,AMOT,PNLIPRP1,CEACAM7,PSTPIP2,NASP,NPC1L1,ADRB1,C3orf67,OTUD4,BAG1,PTPN3,MAP1LC3B,UBE3A,NCAM1…	668
Cell-To-Cell Signaling and Interaction	adhesion	adhesion of lymphoma cell lines	0.00711					S1PR2,CD59,RCAN1,ELN,IL6,NFKBIA,F2R,PNPLA2,VCAN,CD55,NOS3,FOXO1,F2,WNT3A	14
Cancer, Hematological Disease, Immunological Disease, Organismal Injury and Abnormalities	lymphocytic cancer	grade 1 lymphocytic cancer	0.00718					CCR7,ABCA13,FILIP1L,CNTN4,NDNF,SHROOM2,CSF3R,TRIP12,SHANK3,RTN2,ELK1,MALT1,LPIN1,CHD6,RRM2,SHROOM3,BCL10,OTUD7B,GNG4,CHD2,BCOR,TLR2,PCLO,POT1,KPNA1,TOP2A,PEG10,MED1,ASAP2,SLC6A5,BZW2,DUSP2,CD69,STK38,RRM1,ATP10A,DNAH5,GYS1,CLCC1,CCDC113,NCAN,KCNJ16,RIN3,PRIM1,RBCK1,ARHGEF15,CXCL12,ASXL3,CHEK2,FOXP1,CLEC17A,FBN2,C5orf22,ZNF37A,PPP3CC,TP53,NOTCH2,NXF1,GREB1,PDLIM3,STEAP3,KLHL6,GTPBP2,ANKRD40,ECE2,P…	79
Cancer, Organismal Injury and Abnormalities	serous adenocarcinoma	serous adenocarcinoma	0.00719					FAM107A,DPP6,PI3,GALE,F2R,DCAF16,LRIG1,BCL10,NUCB1,ARID1B,MYH11,TAF1,TOP2A,EFNB1,DNAH7,HSP90B1,GDF10,KCNJ4,SPOCK2,CTNNAL1,AR,RRM1,DNAH5,SFRP4,VCAN,ZNF274,MYLK,GNAT1,GTF2IRD1,KIAA0355,CXCL12,PBRM1,ELAVL3,CLEC17A,ZBTB16,ABCC11,EPHA3,LMOD1,IL6,SIK2,TP53,INA,MS4A2,SPINT2,AXIN2,FN1,FAM69A,SIN3A,ADCY2,NCOR1,ARID5B,FZD3,PTGES,VGLL1,CASZ1,VAV3,PLPP1,CDH13,PDGFRB,POLE4,ARHGAP35,GYG1,LTA,OTUD4,LPP,B2M,CALC…	165
Cancer, Gastrointestinal Disease, Organismal Injury and Abnormalities	gastro-esophageal carcinoma	gastro-esophageal carcinoma	0.0073					RNF219,KIAA1217,CCDC25,RTN2,TESPA1,PI3,LILRB4,TTC29,USP6NL,YIPF1,TOP2A,S100A7A,TM2D3,KCNJ4,RPS6KC1,TAP2,WHAMM,TCERG1L,ZNF423,C11orf84,NXPH3,IQSEC2,FYCO1,TMEM97,C17orf74,MAGI2,FFAR3,SIK2,HIC2,CCDC40,SIN3A,PCDH17,ANKRD40,IPCEF1,PSTPIP2,OAS2,PTPN3,PDE2A,WSCD2,EEF2K,B4GALT7,NCAM1,GART,FTH1,EXT1,PTPN21,INMT,SCN3B,TMTC1,TTC14,UMPS,C2CD3,CASR,ACVR1B,PXDN,SLIT2,CABIN1,TLE3,FBXO47,SLC24A3,CALD1,SESTD1,TFD…	388
Cell Morphology, Cellular Function and Maintenance	autophagy	autophagy of tumor cell lines	0.00731					CXCL12,AKT3,ATG5,GTF2IRD2/GTF2IRD2B,MTMR3,TP53,SNAI1,CHRND,DICER1,DCN,TACR2,FOXO1,CAPNS1,PINK1,MAP3K7,KIF5C,CISD1,IKBKB,AKT2,UBASH3B,EEF2K,BECN1,KRT18,MAP1LC3B,GABARAPL1,SORCS2,NACC1,DNAJA3,RPTOR,SH3GLB1,HIF1A,XBP1,TP73,FAS,ICMT,PPFIA4,CHEK1	37
Cell Cycle	G1 phase	G1 phase of bladder cancer cell lines	0.00757					PTEN,DARS,CDKN1A,TP53	4
Cell Cycle	S phase	S phase of lymphoma cell lines	0.00757					CDKN1B,CDKN1A,ARNT,TP53	4
Cellular Assembly and Organization	association	association of cytoskeleton	0.00757					CXCL12,FXYD5,TIMP2,F2	4
Embryonic Development, Organismal Development, Tissue Development	branching morphogenesis	branching morphogenesis of epithelial tubule	0.00757					SLIT2,BMP4,PAK1,MET	4
Embryonic Development, Organismal Development	development	development of blastocyst	0.00757					F2R,KCNIP3,LHCGR,F2	4
Cellular Development, Connective Tissue Development and Function, Tissue Development	differentiation	differentiation of fibrocytes	0.00757					F2R,F2RL1,SLIT2,F2	4
Cellular Assembly and Organization, Cellular Function and Maintenance, Cellular Movement, Nervous System Development and Function	endocytosis	endocytosis of synaptic vesicles	0.00757					STON2,ITSN1,PIP5K1C,PPP3CC	4
Developmental Disorder, Hereditary Disorder, Metabolic Disease, Organismal Injury and Abnormalities	hyperphenylalaninemia	hyperphenylalaninemia	0.00758					GCH1,NOS3,QDPR,PAH,PCBD1	5
Infectious Diseases	reactivation	reactivation of Herpesviridae	0.00758					SMAD3,XBP1,ZEB2,TGFBR1,CD40	5
Cancer, Organismal Injury and Abnormalities, Respiratory Disease	malignant pleural mesothelioma	unresectable malignant pleural mesothelioma	0.00758					GART,DHFR,HSP90B1,ATIC,PDCD1	5
Cell-To-Cell Signaling and Interaction	binding	binding of tumor cell lines	0.00763					SELL,FGF19,ZEB2,KLK3,PLD1,NFKBIA,CLEC4G,F2R,CD248,BCL10,PNPLA2,FUT4,SMAD3,SS18,NOS3,FES,ACTN4,TLR2,ESR1,F2,ALOX15,EFNB1,ALCAM,RCAN1,LEF1,NECTIN2,INSR,EGFL7,AR,VHL,PI4KB,SLIT2,CDCP1,PRNP,CD28,SFRP4,VCAN,SELPLG,CD55,JAM3,SERPINE1,FAS,RHOU,S1PR2,CHST6,CXCL12,CD59,HCK,CD226,FOXP1,GMFG,RBM17,PIK3R1,IL6,HOXA4,OXTR,SNAI1,HAS2,FN1,CDHR3,MGAT5,SIGMAR1,DCN,BCAN,ITGB3,CRK,GRK6,FOXO1,WNT3A,HS3ST3B1,PAK2,RACK…	93
Cancer, Endocrine System Disorders, Organismal Injury and Abnormalities, Reproductive System Disease	endometrioid ovarian cancer	ovarian endometrioid carcinoma	0.00778					ZNF100,HOXC8,DPP6,CERCAM,NEUROD4,FOXO6,WTIP,OR7D2,LUC7L3,AMER3,PMFBP1,ZC3H7B,FES,KPNA1,TGFBRAP1,TOP2A,KRTAP4-2,HSP90B1,ADAMTS10,FAM105A,THNSL1,DNAH5,NRP1,ARG2,BCLAF1,AKR1C1/AKR1C2,TPO,PTX4,ERCC1,ELAVL3,ABCC11,ARHGAP44,GRID1,EPHA3,PROSER3,MAGI2,POLR1D,AGK,ADCY2,NCOR1,ARID5B,PCDH17,SCN11A,WWP2,STRIP1,ATF7IP2,PNLIPRP1,CEACAM7,NPC1L1,GBP2,IGF2R,PHLDA1,NCAM1,LTB4R,SLC12A5,SH3RF2,SMG1,TAGAP,C9orf3,PTEN…	243
Cell Morphology, Cellular Assembly and Organization, Cellular Function and Maintenance	reorganization	reorganization of cytoskeleton	0.0078					S1PR2,CXCL12,HCK,EFNB1,F2RL1,MAPKAPK5,SEMA3E,CRKL,PAK1,EFNA5,ENG,ARAP1,CLRN1,PARVB,PTPN1,AR,FN1,PHACTR1,NRP1,PTPRF,ITGB3,TPM1,VEGFC	23
Cellular Assembly and Organization, Cellular Function and Maintenance	organization	organization of actin cytoskeleton	0.00781					S1PR2,CXCL12,CORO1A,HCK,F2RL1,FAM107A,MRAS,LIMK1,EPHA3,EFNA5,NUAK2,ARAP1,CLRN1,RALB,ARPC5,LLGL1,DLC1,SSH3,EMP2,RBBP4,CRK,PIP5K1C,STRIP1,ARHGEF18,AMOT,PAK1,PRKG1,IKBKB,ENG,PARVB,GAS2L3,PTPN1,SSH1,PRNP,DNAJA3,NCKAP1L,PHACTR1,ARHGEF2,WHAMM,OR2A4/OR2A7	40
Cancer, Hematological Disease, Immunological Disease, Organismal Injury and Abnormalities	B-cell non-Hodgkin disease	B-cell non-Hodgkin disease	0.00782					CCR7,ABCA13,SIGLEC10,CNTN4,RTN2,DCLK3,CHD6,KLF14,BCL10,TLL2,TLR2,PCLO,TAF1,CORO2A,KPNA1,TOP2A,USP22,PEG10,HSP90B1,ASAP2,BZW2,DUSP2,RRM1,ATP10A,DNAH5,DSC3,FAS,ARHGEF15,CXCL12,RASGRF1,FOXP1,TNRC6C,CLEC17A,EPHA3,FBN2,RNF213,IL6,ZNF37A,TP53,NOTCH2,GREB1,BTG2,RTTN,KIAA0100,HUWE1,ADAMTS15,ALDH1L2,MEF2B,ANKRD40,EIF4EBP1,FOXO1,POLE4,CD3G,CD58,CD5,LTA,TNFRSF8,GBP2,B2M,KLF2,AP4B1,OSBP,PDZD2,CAMTA1,TFCP2,LO…	141
Molecular Transport	transport	transport of molecule	0.00786					CCL8,SLC12A3,HID1,MIA3,SLC24A1,SLC6A7,CHMP1A,PITPNC1,GRM4,SORL1,NPY,TGFBRAP1,KCNK17,KCNJ4,AR,GDNF,RALBP1,BTN3A1,APOA1,AKR1C1/AKR1C2,FAS,PTCH1,ABCC11,NPC2,IL6,FXN,RHBG,AGK,FLVCR1,SLC22A11,SNAP23,SCN11A,WWP2,CD3G,SLC25A26,NPC1L1,ACSL4,HVCN1,KCNK6,SLC6A14,SCNN1B,GLRB,LEP,NUPL2,SMG1,FTH1,GRB10,MGRN1,C3,CNGB1,MICU1,SLC16A3,ATP2B2,ENSA,SMG6,ABCC6,ANO6,SCN3B,TTYH3,SNX9,SLC6A5,ADRA2B,CASR,MYO5B,OLR1,TMED…	217
DNA Replication, Recombination, and Repair	DNA damage response	DNA damage response of cells	0.0079					BAZ1B,TRIP12,FBXO45,FBXO31,RPA1,XRCC3,TAF1,TIGAR,AEN,TOP2A,MCM10,SP100,SOX10,CDKN1B,PHLDA3,YY1,TP73,PPP1R15A,GML,USP47,NUDT1,MICA,RNF168,CHEK2,MCM7,RNF169,CDKN2AIP,HINFP,MRE11,TP53,UBE2E2,NEK4,BTG2,DDX11,CDKN1A,VAV3,TANK,RAD50,RNF8,TFDP3,CDK9,FANCM,RAD1,SMC5,MMS22L,ING4,NABP2,ERCC8,CHEK1	49
Cancer, Neurological Disease, Organismal Injury and Abnormalities	central nervous system cancer	central nervous system cancer	0.00814					LPAR1,TERF2,TNFRSF1A,LIMK1,COL1A1,C2CD4B,FNDC1,NBEA,ARID1B,MYH11,SYNJ2,TAF1,RNF20,TOP2A,ALCAM,HSP90B1,CLMP,H3F3A/H3F3B,SETBP1,EGFL7,MXI1,LDB1,RRM1,FOXA1,ADGRA2,TP73,CLCN4,TPO,GNAI1,RASGRF1,PBRM1,TBR1,GNAO1,PTCH1,EPHA3,IL6,TP53,R3HDM2,SLC12A2,ARRB1,MGMT,AXIN2,ZNF490,FN1,SIN3A,NCOR1,ARID5B,FA2H,VAV3,NANOG,FRRS1,PINK1,PDGFRB,MAP4K4,ARHGAP35,LTA,GBP2,BDKRB2,FAM111A,RAD1,EEF2K,PYCARD,CAMTA1,NCAM1,GART…	147
Cancer, Hematological Disease, Organismal Injury and Abnormalities	atypical myeloproliferative neoplasm	atypical myeloproliferative neoplasm	0.00816					RRM2,PDGFRB,RRM1,PDGFRA,CSF3R,SETBP1,ASXL1	7
Cardiovascular Disease, Organismal Injury and Abnormalities	hemodynamically unstable ventricular tachycardia	hemodynamically unstable ventricular tachycardia	0.00816					KCNK3,ADRB1,KCNA7,KCNJ12,KCNJ5,CACNA2D2,KCNE1	7
Infectious Diseases	infection	infection of leukocyte cell lines	0.00816					CD28,C3,CD58,TRIM5,CD4,C1S,CD86	7
Cardiovascular Disease, Organismal Injury and Abnormalities, Skeletal and Muscular Disorders	recurrent ventricular fibrillation	recurrent ventricular fibrillation	0.00816					KCNK3,ADRB1,KCNA7,KCNJ12,KCNJ5,CACNA2D2,KCNE1	7
Cancer, Hematological Disease, Immunological Disease, Organismal Injury and Abnormalities	T-cell prolymphocytic leukemia	T-cell prolymphocytic leukemia	0.00823					RRM2,TOP2A,MTCP1,RRM1,CD5,PPP3CB,CD4,GBP2,PPP3CC,PRIM1,ATXN1,CIITA	12
Cellular Growth and Proliferation	colony formation	colony formation of colorectal cancer cell lines	0.00823					CDX2,DLC1,CDKN1B,HIF1A,TNS4,PRKG1,CEACAM5,VPS28,TRAF4,FXN,PTGES,TP53	12
Developmental Disorder, Hereditary Disorder, Neurological Disease, Organismal Injury and Abnormalities	X-linked mental retardation	X-linked mental retardation	0.00851					KIAA2022,MECP2,ZDHHC9,RBMX,GRIA3,SYP,ARHGEF6,ZNF81,HUWE1,PHF8,SCN11A,SCN3B,TAF1,ADRA1A,HTR2A,SMS,MAOA,GDI1,ZNF41,SCN8A,ADRA2B,OPHN1,MID2,ARX,ACSL4,SLC6A3,SRPX2,CLCN4,IQSEC2	29
Hematological Disease, Immunological Disease	B-cell lymphoproliferative disorder	B-cell lymphoproliferative disorder	0.0086					CCR7,ABCA13,SIGLEC10,CNTN4,RTN2,DCLK3,CHD6,KLF14,BCL10,TLL2,TLR2,PCLO,TAF1,CORO2A,KPNA1,TOP2A,USP22,PEG10,HSP90B1,ASAP2,BZW2,DUSP2,RRM1,ATP10A,DNAH5,TP73,DSC3,FAS,ARHGEF15,CXCL12,RASGRF1,FOXP1,TNRC6C,CLEC17A,EPHA3,FBN2,RNF213,IL6,ZNF37A,TP53,NOTCH2,GREB1,BTG2,RTTN,KIAA0100,HUWE1,ADAMTS15,ALDH1L2,MEF2B,ANKRD40,EIF4EBP1,FOXO1,POLE4,CD3G,CD58,CD5,LTA,TNFRSF8,GBP2,B2M,KLF2,AP4B1,OSBP,PDZD2,HVCN1,CAMT…	151
Cellular Movement	migration	migration of tumor cell lines	0.00867					CCR7,AGER,LPAR1,LIMK1,GALNT2,DPAGT1,SH3PXD2B,EFNA5,COL1A1,NR5A2,CSE1L,GRN,F2R,BCL10,PVR,TGFBR1,TLR2,DCBLD2,EFNB1,ALCAM,HDGF,CDX1,CCL11,DPYSL2,TIMP2,CTNNAL1,SSH1,AR,GDNF,EPO,LMCD1,RALBP1,DNAJA3,FOXA1,SFRP4,VCAN,NRP1,TWIST2,RAP1B,TP73,VPS28,FOXD3,RHOU,CLCN4,GNAI1,CXCL12,WNT5A,FOXP1,S1PR3,CRMP1,PODXL,IL6,USP5,HOXA4,TP53,MYADM,SLC12A2,NOTCH2,ARRB1,AGK,SNAI1,PTPRH,FN1,DLC1,P2RY2,BCAR3,DCN,BCAM,CRK,PRK…	191
Cardiovascular System Development and Function, Organismal Development	vasculogenesis	vasculogenesis	0.009					AGER,KLK3,COL1A1,KLHL20,F2R,TBX20,BMP4,ATP5A1,TGFBR1,ALCAM,TRPM7,CCL11,NCKIPSD,VASH1,TIMP2,EGFL7,EPO,NRP1,YY1,RAP1B,BCLAF1,ARHGEF15,CXCL12,CREB1,MYDGF,WNT5A,HPSE,S1PR3,HIPK1,SYNJ2BP,ARHGEF26,KLF10,IL6,TP53,FN1,DCN,PRKD2,RAB10,FOXO1,NANOG,CDH13,CCL1,PDE2A,KLF2,NDP,ING4,PRKCA,CSF1,PROCR,LEP,AXL,RGS4,NDNF,C3,PLD1,PATJ,PDCL3,DICER1,VEGFC,F2,TRPC4,COL4A1,FABP4,RCAN1,PRKG1,SEMA6A,ENG,PTPN1,OLR1,BMPR1A,…	97
Cancer, Dermatological Diseases and Conditions, Hematological Disease, Immunological Disease, Organismal Injury and Abnormalities	Sézary syndrome	Sézary syndrome	0.00903					TOP2A,TCF3,POLE4,FPGS,MNT,CD5,TNFRSF8,TP53,RASSF4,RRM2,MXI1,RRM1,DHFR,BCL10,TOX,RXRA,RPA1,PLCG1,CD4,CCR4,RDH10,KLHL42,DUSP4	23
Cancer, Organismal Injury and Abnormalities	invasion	invasion of epithelial tissue	0.00905					GBP1,MAP4K4,CHGA,THBD,SP100,KLK3,CCL1,RGS4,VEGFC,TIMP2	10
Cancer, Gastrointestinal Disease, Organismal Injury and Abnormalities	upper gastrointestinal tract cancer	upper gastrointestinal tract cancer	0.00909					DNA2,RNF219,CCL8,KIAA1217,CCDC25,RTN2,TESPA1,PI3,LILRB4,TTC29,USP6NL,YIPF1,TOP2A,S100A7A,TM2D3,ASAP2,KCNJ4,CCL11,RPS6KC1,WDR55,TAP2,WHAMM,TCERG1L,ZNF423,C11orf84,NXPH3,IQSEC2,FYCO1,TMEM97,ELAVL3,C17orf74,MAGI2,IL6,FFAR3,SIK2,HIC2,CCDC40,SIN3A,DCN,PCDH17,ANKRD40,CDH13,IPCEF1,GRK4,CD3G,PSTPIP2,ADRB1,OAS2,BAG1,PTPN3,PDE2A,WSCD2,EEF2K,SKIDA1,B4GALT7,NCAM1,GART,FTH1,C11orf57,EXT1,MYCL,RRM2,PTPN21,INMT…	514
Cancer, Organismal Injury and Abnormalities	childhood solid tumor	childhood solid tumor	0.00918					MGMT,RRM2,TOP2A,RRM1,HSP90B1,CSF3R,H3F3A/H3F3B,ENG,PRIM1	9
Hematological System Development and Function	coagulation	coagulation	0.00922					CD59,ADORA2A,F2RL1,PDGFRA,LMAN1,ANXA5,STX2,F5,IL6,SPINT2,SCARA5,FAM46A,F2R,GGCX,THBD,CLEC4M,F3,ITGB3,PROCR,NOS3,BLOC1S3,TLR2,F2,PLPP1	24
Cardiovascular Disease, Organismal Injury and Abnormalities	coronary disease	coronary disease	0.00937					ADORA2A,APLNR,SLC12A3,C3,CHRNA10,DPP6,CSF3R,MIA3,CYP2C19,EIF4H,GPD1L,F2R,LRIG1,SMG6,SMAD3,NOS3,SCN3B,TLR2,ESR1,F2,CORO2A,SNX29,CHRNA5,PSRC1,CACNA1E,INSR,ADRA2B,AR,EPO,APOB,SLC6A3,CDCP1,MTHFD1L,ZNF274,NCAN,CD55,APOA1,KCNJ5,SERPINE1,RCSD1,HRH2,NNMT,CXCL12,F2RL1,PDE4A,NPR1,KCNA7,FRMD4A,IL6,APOC3,PPP3CC,CA5B,KCNK3,CERS6,DHFR,LDLR,CHRND,IL1R1,PDE7B,KCNJ12,ITGB3,CACNA1D,KALRN,ADRA1A,CDH13,GABRR2,GABRG2…	94
Cellular Movement	cell movement	cell movement of hepatoma cell lines	0.00956					GNAI1,CXCL12,PTEN,CDK14,GALNT2,EFNA5,NR5A2,ELK1,DLC1,MET,P2RY2,MGAT5,TMPO,HDGF,NTN1,PAK1,SLC2A1,AR,LMCD1,CTSH,PRKCA,CDKN1B,VCAN,PHACTR1,RAP1B,LEP,ZBTB7A	27
Cancer, Cell-To-Cell Signaling and Interaction, Inflammatory Response	cytotoxic reaction	cytotoxic reaction of tumor cell lines	0.00963					TOP2A,PTEN,ATG5,IL6,TP53,BECN1,CDK5R1,DICER1,CDKN1A,MET,GSTM4,EIF4EBP1,MSH2	13
Cancer, Hematological Disease, Immunological Disease, Organismal Injury and Abnormalities	small lymphocytic lymphoma cancer	small B-cell lymphocytic lymphoma	0.0098					ABCA13,FILIP1L,CNTN4,NDNF,SHROOM2,TRIP12,SHANK3,RTN2,ELK1,LPIN1,CHD6,RRM2,SHROOM3,OTUD7B,GNG4,CHD2,BCOR,TLR2,PCLO,POT1,KPNA1,TOP2A,PEG10,MED1,ASAP2,SLC6A5,BZW2,DUSP2,STK38,RRM1,ATP10A,DNAH5,GYS1,CLCC1,CCDC113,NCAN,KCNJ16,RIN3,PRIM1,RBCK1,ARHGEF15,ASXL3,CHEK2,CLEC17A,FBN2,C5orf22,ZNF37A,PPP3CC,TP53,NOTCH2,NXF1,GREB1,PDLIM3,STEAP3,KLHL6,GTPBP2,ANKRD40,ECE2,PPP3CB,SLC4A10,OSBP,PDZD2,CSDE1,TMEM132D,T…	69
Cell Cycle	G2/M phase	arrest in G2/M phase	0.0102					CDH13,ERCC1,MCM10,PTEN,LIMK2,CHEK2,SIAH2,LIMK1,MRE11,IL6,TP53,MGMT,AR,CSE1L,MXI1,CELF2,SPHK2,RPA1,CCNB1,RBCK1,CHEK1,KDM5B	22
Cell Cycle	cell cycle progression	arrest in cell cycle progression of colorectal cancer cell lines	0.0105					VHL,TRIM39,PADI4,HEXIM1,CDKN1A,TP53	6
Cell Morphology, Cellular Assembly and Organization, Cellular Function and Maintenance	extension	extension of lamellipodia	0.0105					LMCD1,CTTN,CRKL,LIMK1,CRK,PLXNB1	6
Endocrine System Disorders, Hematological Disease	hypocalcemia	hypocalcemia	0.0105					GATA3,GHR,VDR,STX16,CASR,FAM111A	6
Cancer, Ophthalmic Disease, Organismal Injury and Abnormalities	retinoblastoma cancer	retinoblastoma	0.0105					GLTSCR2,VHL,LOXL2,CDKN1A,CSF3R,CYP51A1	6
Cell Morphology, Cell-To-Cell Signaling and Interaction, Cellular Assembly and Organization	size	size of focal adhesions	0.0105					PAK2,PAK1,ACTN4,AKT2,TP53,SLC12A2	6
Cancer, Organismal Injury and Abnormalities	breast or colorectal cancer	breast or colorectal cancer	0.0108					GTF2B,PPP2R5E,NTSR1,TMEM43,RTN2,TTC29,USP6NL,AMER3,SORL1,LUZP2,TOP2A,SEMA5B,AMFR,ASAP2,KCNJ4,SAMD9L,RPS6KC1,GPR83,DENND2A,TCERG1L,TMEM239,SLC35D2,TTC28,TMEM97,KIAA0355,RASGRF1,PLA2G4E,MRGPRF,CTCFL,CCL16,MESP1,HIC2,NLRP10,GTF2F1,CCDC40,ALDH1L2,ZNF280D,ATXN7,DCN,CDH13,AMOT,ZNF154,CD3G,PSTPIP2,NASP,HOXD12,BAG1,ZBTB17,ARMC5,MXD3,TM9SF4,SKIDA1,NPLOC4,FAM46A,MASP1,RAB3A,RASD2,GSDMB,SH3RF2,RGS4,LONRF2,Z…	1393
Cardiovascular Disease, Organismal Injury and Abnormalities	unstable angina	unstable angina	0.0109					CXCL12,F2RL1,KCNA7,KCNE1,KCNK3,F2R,SLC6A3,CACNA1C,KCNJ12,KCNJ5,ITGB3,ESR1,CACNA1D,F2	14
Cancer, Hematological Disease, Immunological Disease, Organismal Injury and Abnormalities	non-Hodgkin disease	grade 1 non-Hodgkin disease	0.0109					ABCA13,FILIP1L,CNTN4,NDNF,SHROOM2,CSF3R,TRIP12,SHANK3,RTN2,ELK1,LPIN1,CHD6,RRM2,SHROOM3,OTUD7B,GNG4,CHD2,BCOR,TLR2,PCLO,POT1,KPNA1,TOP2A,PEG10,MED1,ASAP2,SLC6A5,BZW2,DUSP2,STK38,RRM1,ATP10A,DNAH5,GYS1,CLCC1,CCDC113,NCAN,KCNJ16,RIN3,PRIM1,RBCK1,ARHGEF15,ASXL3,CHEK2,CLEC17A,FBN2,C5orf22,ZNF37A,PPP3CC,TP53,NOTCH2,NXF1,GREB1,PDLIM3,STEAP3,KLHL6,GTPBP2,ANKRD40,ECE2,PPP3CB,SLC4A10,OSBP,PDZD2,CSDE1,TMEM…	70
Cellular Assembly and Organization	formation	formation of cytoskeleton	0.0111					GNG7,ARAP1,F2R,CORO7/CORO7-PAM16,FES,SKIL,F2,AKAP1,PSRC1,EML2,ARHGEF10,CCL11,DPYSL2,NCKIPSD,AR,LMCD1,SLIT2,NCK2,APOA1,CALD1,S1PR2,HCK,CREB1,NPR1,GNAO1,TNS4,TPM4,LMOD1,MYADM,ARRB1,FN1,TNS3,DLC1,ITGB3,RBBP4,TPM2,KCTD13,TPM1,SIRPA,TSC1,SH3PXD2A,GDI1,CXXC5,ARFGEF1,LIMK2,CTTN,RP1,PAK1,FER,KLF2,RPS3,NCKAP1L,PHACTR1,GNG2,PAK4	55
Cellular Movement	cell movement	cell movement of lymphoma cell lines	0.0112					CCR7,CXCL12,CCL22,ARHGEF6,SELL,SELPLG,TNFRSF8,ENG,CCL1,CD40,IL6	11
Cancer, Endocrine System Disorders, Organismal Injury and Abnormalities, Reproductive System Disease	ovarian serous tumor	ovarian serous tumor	0.0115					FAM107A,F2R,DCAF16,LRIG1,BCL10,NUCB1,ARID1B,TAF1,TOP2A,EFNB1,DNAH7,HSP90B1,KCNJ4,CTNNAL1,AR,RRM1,DNAH5,VCAN,ZNF274,GNAT1,GTF2IRD1,KIAA0355,PBRM1,ELAVL3,CLEC17A,ABCC11,EPHA3,SIK2,TP53,SPINT2,AXIN2,FN1,FAM69A,SIN3A,ADCY2,NCOR1,ARID5B,FZD3,PTGES,CASZ1,VAV3,PLPP1,PDGFRB,POLE4,ARHGAP35,GYG1,LTA,OTUD4,B2M,CALCOCO2,GART,PLAGL2,GINS1,KCNK6,ERAP2,ADORA2A,ZNF790,PTEN,ZNF738,FCAMR,FLII,TMEM267,TNPO1,ZNF510,…	114
Infectious Diseases, Respiratory Disease	bacterial respiratory infection	bacterial respiratory infection	0.0119					TOP2A,DHFR,GABRG2,GABRG3,TIRAP,VDR,WBSCR22,IL6,TLR2,GABRG1	10
Cellular Assembly and Organization, Cellular Function and Maintenance	quantity	quantity of cellular protrusions	0.0119					CTTN,NTN1,MYL2,ARHGAP44,CRMP1,HOXA4,AR,HAS2,FN1,RBBP4,BDNF,ESR1,F2	13
Hematological System Development and Function, Organismal Functions	coagulation	coagulation of blood	0.012					CD59,ADORA2A,F2RL1,PDGFRA,LMAN1,ANXA5,STX2,IL6,SPINT2,SCARA5,FAM46A,F2R,GGCX,THBD,CLEC4M,F3,ITGB3,PROCR,NOS3,BLOC1S3,TLR2,F2,PLPP1	23
Hematological Disease, Infectious Diseases	infection	infection by Zaire ebolavirus	0.012					RPS6,CLEC4M,HSPA5,PAK1,HIST1H2BO,AXL,FCN2	7
Cancer, Gastrointestinal Disease, Organismal Injury and Abnormalities	upper gastrointestinal tract tumor	upper gastrointestinal tract tumor	0.012					DNA2,RNF219,RIC8A,CCL8,KIAA1217,CCDC25,RTN2,TESPA1,PI3,LILRB4,TTC29,USP6NL,YIPF1,TOP2A,S100A7A,TM2D3,ASAP2,KCNJ4,CCL11,RPS6KC1,WDR55,TAP2,WHAMM,TCERG1L,ZNF423,C11orf84,NXPH3,IQSEC2,FYCO1,TMEM97,ELAVL3,C17orf74,MAGI2,IL6,FFAR3,SIK2,HIC2,CCDC40,SIN3A,DCN,PCDH17,ANKRD40,CDH13,IPCEF1,GRK4,CD3G,PSTPIP2,ADRB1,OAS2,BAG1,PTPN3,PDE2A,WSCD2,EEF2K,SKIDA1,B4GALT7,NCAM1,GART,FTH1,C11orf57,EXT1,MYCL,RRM2,PTPN2…	522
Cell Morphology, Cellular Assembly and Organization, Cellular Development, Cellular Function and Maintenance, Cellular Growth and Proliferation, Nervous System Development and Function, Organismal Development, Tissue Development	neuritogenesis	neuritogenesis	0.0121					SEMA4D,AGER,DAB1,CNTN4,PDGFRA,TOR1A,EFNA5,ATRN,DPYSL2,IL6,TBC1D24,KIF13B,GDNF,NCAM1,BTG2,SLIT2,PRNP,FBXW8,CAMSAP1,PARD6B,POMC,BDNF,WNT3A,AMIGO1	24
Cell Signaling, Molecular Transport, Small Molecule Biochemistry, Vitamin and Mineral Metabolism	release	release of Ca2+	0.0122					CXCL12,F2RL1,PACS2,WNT5A,GNAO1,IL6,TP53,HOMER1,TRPM2,CERS6,F2R,FN1,HAP1,CD4,GRK6,TLR2,F2,HTR2A,PSEN1,CD5,SCN8A,PRND,PRNP,CD28,CSF1,KCNIP3,PLCG1,FAS,RYR2	29
Cell Death and Survival	cell death	cell death of lymphoblastoid cell lines	0.0122					WNT5A,FANCC,SNPH,PIK3R1,IL6,NFKBIA,TP53,LARP1B,LRIG1,TERF1,NT5C1B,CDKN1A,PJA1,IQGAP2,NT5E,CASP2,DUSP4,VAV3,PDE1B,MID2,CADM1,SLC28A1,FAS,MSH2,CHEK1	25
Neurological Disease, Organismal Injury and Abnormalities, Psychological Disorders	cerebral hemorrhage	cerebral hemorrhage	0.0123					ADORA2B,ADORA2A,COL4A1,PDE4A,INSR,F3,JAM3,F5,F2	9
Hereditary Disorder, Organismal Injury and Abnormalities	autosomal dominant disease	autosomal dominant disease	0.0124					DNA2,CNBP,TMEM43,TNFRSF1A,DPP6,RTN2,COL1A1,GRN,ARID1B,TNFRSF11A,TOP2A,MTFMT,SAMD9L,GREM1,PIEZO2,GDNF,APOA1,FAS,UFSP2,ARHGAP31,WNT5A,GNAO1,MCM7,PTCH1,TPM4,GCH1,ATXN7,SCN11A,HTR2A,ADRB1,TOR1A,FAM111A,ARMC5,CELF2,BMP1,TGIF1,SLC12A5,RPS6KA1,AOC3,RGS4,FTH1,ITM2B,PTEN,DMPK,EXT1,CSF3R,ZEB2,BICD2,IMPG2,PACS1,ACTN4,BDNF,SCN3B,POT1,CHST3,COL4A1,SPTLC2,PDGFRA,PRKG1,MELK,SLC6A5,ENG,ADRA2B,CASR,NPRL3,RHO,BMPR…	198
Cardiovascular Disease, Hereditary Disorder, Organismal Injury and Abnormalities	familial thoracic aortic aneurysm and dissection	familial thoracic aortic aneurysm and dissection	0.0125					SMAD3,SLC2A10,PRKG1,MYH11,MYLK,FBN2,TGFBR1,FAS	8
Cancer, Hematological Disease, Immunological Disease, Organismal Injury and Abnormalities	T-cell leukemia	T-cell leukemia	0.0127					CCR7,ADORA2A,PTEN,CSF3R,GATA3,RRM2,BCL10,RABGEF1,IL7R,PRICKLE2,JARID2,VMP1,CD4,CCR4,CD86,CIITA,POT1,TOP2A,PDGFRA,RBM7,LEF1,HSP90B1,IKBKB,MYB,CADM1,RRM1,CD28,FAS,TSR1,RHOU,PRIM1,CSNK1A1,MTCP1,ZNF835,HECTD1,PPP3CC,TP53,DHFR,OPN4,PDE7B,CDKN1A,ARID5B,TRRAP,PDGFRB,POLE4,CD58,CD5,PPP3CB,GBP2,B2M,PLCG1,ETV6,ATXN1	53
Cardiovascular System Development and Function, Hematological System Development and Function	blood pressure	blood pressure	0.0128					CDH13,CXCL12,ADRB1,DOT1L,CYP3A4,MTHFR,STK39,EPO,GCH1,CHGA,APOB,LDLR,NOS3,ERAP2,ADRA1A,NPY	16
Cardiovascular Disease, Organismal Injury and Abnormalities	acute coronary event	acute coronary event	0.013					CXCL12,ADORA2A,F2RL1,NPR1,C3,KCNA7,DPP6,CSF3R,IL6,PPP3CC,KCNK3,GPD1L,F2R,IL1R1,KCNJ12,ITGB3,NOS3,SCN3B,TLR2,ESR1,CACNA1D,ADRA1A,F2,NPC1L1,ADRB1,PPP3CB,INSR,ANK2,KCNE1,ADORA2B,AR,EPO,SLC6A3,NEBL,CACNA1C,APOA1,KCNJ5,SERPINE1,RYR2	39
Cell-To-Cell Signaling and Interaction	interaction	interaction of tumor cell lines	0.0132					SELL,FGF19,ZEB2,KLK3,PLD1,NFKBIA,CLEC4G,F2R,CD248,BCL10,PNPLA2,FUT4,SMAD3,SS18,NOS3,FES,ACTN4,TLR2,ESR1,F2,ALOX15,EFNB1,ALCAM,RCAN1,LEF1,NECTIN2,INSR,EGFL7,AR,VHL,PI4KB,SLIT2,CDCP1,PRNP,CD28,RPTOR,SFRP4,VCAN,SELPLG,CD55,JAM3,SERPINE1,FAS,RHOU,S1PR2,CHST6,CXCL12,CD59,HCK,CD226,FOXP1,GMFG,RBM17,PIK3R1,IL6,HOXA4,OXTR,SNAI1,HAS2,FN1,CDHR3,MGAT5,SIGMAR1,DCN,BCAN,ITGB3,CRK,GRK6,FOXO1,WNT3A,HS3ST3B1,PAK…	94
Cell Cycle	S phase	S phase of prostate cancer cell lines	0.0132					AGK,AR,CDKN1B,PMEPA1,F2	5
Cancer, Organismal Injury and Abnormalities, Renal and Urological Disease	transitional cell carcinoma of the renal pelvis	advanced transitional cell carcinoma of the renal pelvis	0.0132					RRM2,RRM1,POLE4,HSP90B1,PDCD1	5
Cancer, Organismal Injury and Abnormalities, Renal and Urological Disease	ureteral transitional cell carcinoma	advanced ureteral transitional cell carcinoma	0.0132					RRM2,RRM1,POLE4,HSP90B1,PDCD1	5
Cancer, Organismal Injury and Abnormalities, Renal and Urological Disease	urethral urothelial carcinoma	advanced urethral urothelial carcinoma	0.0132					RRM2,RRM1,POLE4,HSP90B1,PDCD1	5
Cellular Assembly and Organization, Cellular Function and Maintenance	endocytosis	endocytosis of vesicles	0.0132					STON2,CABIN1,ITSN1,PIP5K1C,PPP3CC	5
Cardiovascular Disease, Hereditary Disorder, Organismal Injury and Abnormalities	familial thoracic aortic aneurysm	familial thoracic aortic aneurysm	0.0132					SMAD3,PRKG1,MYH11,MYLK,TGFBR1	5
Cell-To-Cell Signaling and Interaction, Cellular Assembly and Organization, Cellular Function and Maintenance	formation	formation of tight junctions	0.0132					ING4,CRB3,DPAGT1,PARD3B,MPP7	5
Cancer, Organismal Injury and Abnormalities	CD274 positive malignant solid tumor	metastatic CD274 positive malignant solid tumor	0.0132					RRM2,RRM1,POLE4,HSP90B1,PDCD1	5
Cancer, Organismal Injury and Abnormalities, Renal and Urological Disease	mixed cell bladder carcinoma	mixed cell bladder carcinoma	0.0132					RRM2,RRM1,POLE4,HSP90B1,PDCD1	5
Cancer, Organismal Injury and Abnormalities, Renal and Urological Disease	mixed cell renal pelvis carcinoma	mixed cell renal pelvis carcinoma	0.0132					RRM2,RRM1,POLE4,HSP90B1,PDCD1	5
Cancer, Organismal Injury and Abnormalities, Renal and Urological Disease	mixed cell ureter carcinoma	mixed cell ureter carcinoma	0.0132					RRM2,RRM1,POLE4,HSP90B1,PDCD1	5
Cancer, Organismal Injury and Abnormalities, Renal and Urological Disease	mixed cell urethral carcinoma	mixed cell urethral carcinoma	0.0132					RRM2,RRM1,POLE4,HSP90B1,PDCD1	5
Developmental Disorder, Hereditary Disorder, Organismal Injury and Abnormalities, Skeletal and Muscular Disorders	myotonic dystrophy	myotonic dystrophy	0.0132					CNBP,PLCB1,NEDD4,DMPK,MBNL1	5
Cellular Assembly and Organization	quantity	quantity of endocytotic vesicle	0.0132					PTEN,SNX9,CSF1,SYNJ2,SNX33	5
Cell-To-Cell Signaling and Interaction, Hematological System Development and Function, Immune Cell Trafficking, Inflammatory Response	aggregation	aggregation of neutrophils	0.0145					SELL,SELPLG,TLR2	3
Cancer, Cell Death and Survival, Organismal Injury and Abnormalities, Tumor Morphology	apoptosis	apoptosis of acute lymphoid leukemia blast cells	0.0145					FAS,CD40,CASP2	3
Behavior	appetite	appetite	0.0145					SLC6A3,LEP,POMC	3
Cell Cycle	G1 phase	arrest in G1 phase of kidney cancer cell lines	0.0145					VHL,PTEN,FOXO1	3
Cellular Development, Cellular Growth and Proliferation	growth	arrest in growth of bladder cancer cell lines	0.0145					CDKN1A,TP73,TP53	3
Neurological Disease, Skeletal and Muscular Disorders	cervical dystonia	cervical dystonia	0.0145					VAMP1,SNAP25,VAMP2	3
Cancer, Hematological Disease, Immunological Disease, Organismal Injury and Abnormalities	chronic neutrophilic leukemia	chronic neutrophilic leukemia	0.0145					CSF3R,SETBP1,ASXL1	3
Cardiovascular System Development and Function, Cell Morphology	contraction	contraction of endothelial cells	0.0145					LPAR6,F2R,F2	3
Cellular Development, Connective Tissue Development and Function	differentiation	differentiation of fibroblast cell lines	0.0145					FN1,NPC2,KLK3	3
Infectious Diseases	entrance	entrance of Herpesviridae	0.0145					NECTIN1,PDGFRA,PVR	3
Hereditary Disorder, Metabolic Disease, Organismal Injury and Abnormalities, Renal and Urological Disease	familial visceral amyloidosis, ostertag type	familial visceral amyloidosis, ostertag type	0.0145					LYZ,APOA1,B2M	3
Cellular Assembly and Organization, Nervous System Development and Function	fasciculation	fasciculation of axons	0.0145					CNTN4,SLIT2,AMIGO1	3
Cellular Development, Cellular Growth and Proliferation	formation	formation of colorectal cancer cell lines	0.0145					FN1,CDKN1A,TP53	3
Cellular Growth and Proliferation, Organismal Development	growth	growth of Schizosaccharomyces pombe	0.0145					DICER1,RANBP1,TP53	3
Cell Cycle, Embryonic Development	interphase	interphase of embryonic stem cells	0.0145					CDKN1A,TNFRSF8,TP53	3
Developmental Disorder, Endocrine System Disorders, Neurological Disease, Organismal Injury and Abnormalities, Reproductive System Disease	male hypogonadotropic hypogonadism	male hypogonadotropic hypogonadism	0.0145					AR,LHCGR,ESR1	3
Cancer, Organismal Injury and Abnormalities	malignant peritoneal mesothelioma	malignant peritoneal mesothelioma	0.0145					GART,DHFR,ATIC	3
Cellular Function and Maintenance	mitochondrial respiration	mitochondrial respiration of cervical cancer cell lines	0.0145					MRM3,SPHK2,PHB2	3
RNA Post-Transcriptional Modification	modification	modification of RNA fragment	0.0145					DICER1,ALKBH5,DDX21	3
Embryonic Development, Nervous System Development and Function, Organ Development, Organ Morphology, Organismal Development, Tissue Development, Visual System Development and Function	morphology	morphology of retina	0.0145					ATXN7,RHO,TP53	3
Cardiovascular System Development and Function, Organismal Development	patterning	patterning of blood vessel	0.0145					COL4A1,NRP1,ENG	3
Cell Morphology	plasticity	plasticity of cells	0.0145					PXN,ENG,TP53	3
Infectious Diseases, Inflammatory Response, Organismal Injury and Abnormalities, Respiratory Disease	pneumococcal pneumonia	pneumococcal pneumonia	0.0145					TOP2A,DHFR,TIRAP	3
Cell Morphology	polarity	polarity of keratinocytes	0.0145					SSH1,SSH3,ACTN4	3
Cell Cycle	premature senescence	premature senescence of carcinoma cell lines	0.0145					BMP4,CDKN1A,EIF4EBP1	3
Cell Cycle	premature senescence	premature senescence of lung cancer cell lines	0.0145					BMP4,CDKN1A,EIF4EBP1	3
Cellular Assembly and Organization, Cellular Function and Maintenance	presence	presence of actin stress fibers	0.0145					TRIP6,VHL,ENG	3
Cellular Assembly and Organization, Cellular Function and Maintenance, Organismal Development	secretion	secretion of alpha granules	0.0145					EFNB1,VAMP3,F2	3
Neurological Disease, Psychological Disorders	sporadic schizophrenia	sporadic schizophrenia	0.0145					CXCL12,CIT,RBFOX1	3
Cancer, Organismal Injury and Abnormalities, Respiratory Disease	non-small cell lung cancer	stage 4 stable non-small cell lung cancer	0.0145					GART,DHFR,ATIC	3
Cancer, Organismal Injury and Abnormalities, Respiratory Disease	ALK translocation negative EGFR activating mutation negative nonsquamous non-small cell lung carcinoma	stage IIIB ALK translocation negative EGFR activating mutation negative nonsquamous non-small cell lung carcinoma	0.0145					GART,DHFR,ATIC	3
Cancer, Organismal Injury and Abnormalities, Respiratory Disease	ALK translocation negative EGFR activating mutation negative nonsquamous non-small cell lung carcinoma	stage IV ALK translocation negative EGFR activating mutation negative nonsquamous non-small cell lung carcinoma	0.0145					GART,DHFR,ATIC	3
Cell Cycle	sub-G1 phase	sub-G1 phase of breast cancer cell lines	0.0145					AR,ZBTB10,HAS2	3
Carbohydrate Metabolism, Lipid Metabolism, Small Molecule Biochemistry, Vitamin and Mineral Metabolism	synthesis	synthesis of oligosaccharide-diphosphodolichol	0.0145					ALG2,SRD5A3,ALG12	3
Nucleic Acid Metabolism, Small Molecule Biochemistry	synthesis	synthesis of pyrimidine ribonucleotide	0.0145					UMPS,AK5,CTPS1	3
Cellular Development, Connective Tissue Development and Function, Tissue Development	differentiation	differentiation of connective tissue cells	0.0146					FAAH,LILRB4,GATA3,F2R,BMP4,SMAD3,TNFRSF11A,SOX2,FAM213A,F2,PDGFRA,SOX5,MED1,CLTC,TMEM119,GREM1,BMPR1A,BMPR2,GDNF,SLIT2,VCAN,TWIST2,F2RL1,SP7,WNT5A,PTCH1,CCR1,FOXP1,ZBTB16,TPM4,DDX21,RBMX,IL6,MSTN,HAS2,IL11,MAFG,FOXO1,WNT3A,SOX6,ASXL2,ITGA11,AKT2,SND1,SUFU,GAB2,CSF1,CAST,OSBPL11,WNT4,DDR2	51
Neurological Disease, Organismal Injury and Abnormalities	Ohtahara syndrome	Ohtahara syndrome	0.0146					PLCB1,FGF12,GNAO1,GABRG2,SCN8A,PCDH19,STXBP1,ARX,GABRG1,TBC1D24,KCNQ2,SLC6A3,GABRG3,SLC12A5,UBA5,CACNA2D2,ARHGEF9,HTR2A,HTR4	19
Infectious Diseases	dengue fever	dengue fever	0.0147					C3,TNFRSF1A,SELL,F5,IL6,CD69,THBD,F3,CD4,F8,SERPINE1,FAS,F2	13
Cell Cycle	G1 phase	arrest in G1 phase of carcinoma cell lines	0.0153					VHL,SOX6,RPS6,NUAK1,CDKN1B,DOT1L,MET,KRT13,TP53,NOTCH2	10
Cardiovascular Disease, Hematological Disease, Organismal Injury and Abnormalities	thromboembolism	thromboembolism	0.0153					RRM2,EPO,F2R,RRM1,POLE4,HABP2,MTHFR,PROCR,F5,F2	10
Developmental Disorder, Hereditary Disorder, Neurological Disease, Organismal Injury and Abnormalities	Cockayne syndrome	Cockayne syndrome	0.0154					ERCC1,ERCC2,ERCC4,ERCC8	4
Cell Cycle	G1/S phase transition	arrest in G1/S phase transition of carcinoma cell lines	0.0154					SOX6,NUAK1,MET,KRT13	4
Cardiovascular Disease, Organismal Injury and Abnormalities	arterial stiffening	arterial stiffening	0.0154					AR,ADRB1,VDR,CASR	4
Dermatological Diseases and Conditions, Endocrine System Disorders, Hereditary Disorder, Immunological Disease, Organismal Injury and Abnormalities	autoimmune polyendocrine syndrome type 1	autoimmune polyendocrine syndrome type 1	0.0154					CCR7,CD5,IL7R,SELL	4
Cell Cycle, Gene Expression	binding	binding of TATA box	0.0154					GTF2B,TEAD1,IL6,TP53	4
Cancer, Cell Death and Survival, Organismal Injury and Abnormalities, Tumor Morphology	cell death	cell death of multiple myeloma cells	0.0154					FAS,CD40,IL6,CHEK1	4
Developmental Disorder, Hereditary Disorder, Ophthalmic Disease, Organismal Injury and Abnormalities	congenital stationary night blindness type 1	congenital stationary night blindness type 1	0.0154					GPR179,SLC24A1,GNAT1,TRPM1	4
Lipid Metabolism, Small Molecule Biochemistry	distribution	distribution of lipid	0.0154					CHMP1A,CXCL12,CD28,ABCG1	4
Cell Cycle	S phase	exit from S phase of colorectal cancer cell lines	0.0154					MXI1,MXD4,CDKN1A,MXD3	4
Endocrine System Disorders, Hematological Disease, Metabolic Disease, Organismal Injury and Abnormalities	hypoparathyroidism	hypoparathyroidism	0.0154					GATA3,VDR,CASR,FAM111A	4
Cellular Movement	movement	movement of bone marrow cell lines	0.0154					SEMA4D,CXCL12,DLC1,FAS	4
Gastrointestinal Disease	nonulcer dyspepsia	nonulcer dyspepsia	0.0154					TOP2A,CACNA1B,CACNA2D2,HRH2	4
Cellular Development, Cellular Growth and Proliferation, Nervous System Development and Function	proliferation	proliferation of nervous tissue cell lines	0.0154					CXCL12,NRP1,CD40,TP53	4
Cellular Assembly and Organization	quantity	quantity of macropinosomes	0.0154					PTEN,SNX9,CSF1,SNX33	4
Cancer, Organismal Injury and Abnormalities, Respiratory Disease	sarcomatoid malignant pleural mesothelioma	sarcomatoid malignant pleural mesothelioma	0.0154					GART,DHFR,HSP90B1,ATIC	4
Cellular Assembly and Organization, Cellular Function and Maintenance	secretion	secretion of granules	0.0154					F2R,EFNB1,VAMP3,F2	4
Molecular Transport, Small Molecule Biochemistry	secretion	secretion of lactic acid	0.0154					HSPA5,NPC2,SLC2A1,SLC16A3	4
Cancer, Organismal Injury and Abnormalities, Respiratory Disease	ALK fusion negative EGFR mutation negative non-small cell lung carcinoma	stage III ALK fusion negative EGFR mutation negative non-small cell lung carcinoma	0.0154					GART,DHFR,HSP90B1,ATIC	4
Cancer, Organismal Injury and Abnormalities, Respiratory Disease	stage IIIA lung adenocarcinoma	stage IIIA lung adenocarcinoma	0.0154					GART,DHFR,HSP90B1,ATIC	4
Cancer	transformation	transformation of lung cell lines	0.0154					BTG2,IL6,TP53,BECN1	4
Cancer, Neurological Disease, Organismal Injury and Abnormalities	brain cancer	brain cancer	0.0155					ZNF346,PPM1D,PTEN,TERF2,LIMK1,CSF3R,DICER1,ARID1B,BCOR,SOX2,VEGFC,TAF1,POT1,TOP2A,CALB2,HSP90B1,H3F3A/H3F3B,EPHB2,LDB1,UPF3A,SLIT2,CDKN1B,TP73,ATIC,SERPINE1,MSH2,GNAI1,TBR1,PTCH1,MRE11,IL6,TP53,MGMT,DHFR,TERF1,MET,CABYR,TRRAP,NANOG,PDCD1,GABRG1,RAD1,EEF2K,PYCARD,SUFU,NCAM1,GART,KDM1A,TINF2	49
Cellular Movement	cell movement	cell movement of tumor cell lines	0.0159					CCR7,AGER,LPAR1,CCL8,SELL,GALNT2,DPAGT1,SH3PXD2B,COL1A1,CSE1L,GRN,LRIG1,BCL10,EFNB1,CDX1,CCL11,DPYSL2,CTNNAL1,SSH1,AR,GDNF,RALBP1,DNAJA3,NRP1,TP73,VPS28,FOXD3,RHOU,WNT5A,FOXP1,CCL16,IL6,HOXA4,AGK,PTPRH,BCAR3,DCN,BCAM,PRKD2,HTR2A,SHOC2,CDH13,ARFGEF1,PACSIN2,AJAP1,BAG1,PHLDA1,ACSL4,SRCIN1,ING4,NCAM1,CTSH,GSDMB,CSF1,RPS6KA1,LEP,ZBTB7A,SMG1,AFAP1,FOSL1,PTEN,C3,ZEB2,ELK1,RALB,CD248,TMPO,CCR4,ACTN4,BDN…	222
Tissue Morphology	quantity	quantity of colorectal cancer cell lines	0.0159					FN1,CDX2,CDKN1B,CDKN1A,LEP,TP53	6
Cell Cycle	senescence	senescence of lung cancer cell lines	0.0159					ERVW-1,BMP4,CDKN1A,DOT1L,EIF4EBP1,TP53	6
Cell Morphology, Cellular Function and Maintenance	autophagy	autophagy	0.016					PTEN,ATG5,FLCN,GTF2IRD2/GTF2IRD2B,PLD1,MTMR3,OCRL,DICER1,NOS3,TRIM22,CISD1,TAB3,TRIM5,CLTC,AMFR,IKBKB,ENG,EPHB2,STK38,BECN1,GABARAPL1,DNAJA3,RPTOR,CDKN1B,GRID2,TP73,VPS28,FAS,PPFIA4,CXCL12,AKT3,SCOC,S1PR3,PTPN22,IL6,SIK2,TP53,SNAI1,LARP1,FN1,VTI1A,CHRND,TBC1D9B,MET,DCN,TACR2,EIF4EBP1,FOXO1,ATG14,APOL1,NRBP2,CAPNS1,PINK1,MAP3K7,NBR1,KIF5C,MEFV,ATG2B,MID2,AKT2,UBASH3B,EEF2K,KRT18,MAP1LC3B,LAMP3,SOR…	76
Connective Tissue Disorders, Organismal Injury and Abnormalities, Skeletal and Muscular Disorders	bone lesion	bone lesion	0.0161					ZNF799,BAZ1B,AGER,ADORA2A,MEOX1,ATF7IP,TNFRSF1A,COL1A1,RRM2,LRIG1,AMER1,GHR,CORO7/CORO7-PAM16,TOP2A,CD3EAP,CACNA1E,PDGFRA,HSP90B1,H3F3A/H3F3B,ADRA2B,AR,UPF3A,RRM1,KRTAP4-11,PAM16,BTN3A1,SFRP4,NRP1,FKBP10,SERPINE1,CACNA2D2,UFSP2,TFDP2,PHKA2,SP7,CHEK2,PDE4A,PTCH1,KRTAP5-3/KRTAP5-5,COL27A1,FBN2,CRMP1,PROSER3,IL6,POLR1D,TP53,ETFDH,DHFR,PDE7B,MET,KCNJ12,PLEKHA6,ADRA1A,CHD5,PDGFRB,LRCH1,ADRB1,LTA,NUTM2…	62
Gastrointestinal Disease, Organismal Injury and Abnormalities	polyp	polyp	0.0162					BMPR1A,PTEN,CEACAM7,PDGFRA,RNF43,IL5RA,PLCG1,ENG,HPGDS,TP53,MSH3,GREM1	12
Cardiovascular System Development and Function, Cell Death and Survival, Cell Morphology, Cellular Function and Maintenance	permeability	permeability of endothelial cell lines	0.0162					CXCL12,CREB1,C5AR1,ARHGAP35,RAP1B,PXN,NT5E,TIMP2,F2	9
Neurological Disease, Organismal Injury and Abnormalities	epilepsy	epilepsy	0.0164					EFHC1,C9orf3,SNTB2,PRDM8,CEMIP,SLC6A13,PRICKLE2,FOSB,CHD2,TRIM9,ME2,BDNF,SCN3B,TMTC1,FGF12,ANOS1,DNAJB1,SCN8A,PCDH19,C1QB,ADRA2B,CAMKK1,CASR,NPRL3,DUSP2,LMCD1,SLC6A3,CACNA2D2,ARHGEF9,KCNQ3,DEPDC5,STRADA,GNAO1,CCR1,ST3GAL5,CACNA1B,KLF10,CACNA1I,CA5B,TBC1D24,C11orf96,HOMER1,SLC22A11,KCNQ2,DHFR,LDLR,CDKN1A,SIGMAR1,ARID5B,EIF4A3,SLC6A1,SCN11A,CACNA1D,ADRA1A,HTR2A,PLCB1,GABRR2,GABRG2,ADRB1,STXBP1,SLC2…	77
Cardiovascular Disease, Organismal Injury and Abnormalities, Reproductive System Disease	preeclampsia	preeclampsia	0.0168					AGER,ZNF662,KLF15,CLCN6,FNDC1,FMO2,OLFML2A,LRIG1,NOS3,ZNF362,RBP5,SKIL,CORO2A,KYNU,PDE12,SEMA5B,EGFL7,ROBO4,THNSL1,TMEM204,TMEM97,ARHGEF15,MRGPRF,XPNPEP2,HPSE,FAF2,ZBTB16,LMOD1,NDUFA4L2,HOXA4,C16orf45,VANGL2,CXXC4,RFTN2,HUWE1,NCS1,ZNF823,SLC6A1,CDH13,ZNF154,ADRB1,ABHD4,PDE1B,TMEM52B,UBASH3B,NETO2,XBP1,SP3,OSBPL11,PLCG1,AOC3,FOXN4,SHANK3,PGM2,KIAA1147,FAXDC2,TSPOAP1,INMT,VEGFC,ESR1,F2,SELENON,ARHG…	101
Protein Synthesis	oligomerization	oligomerization of protein	0.0169					STOM,VWA2,CALHM1,STX2,RNF213,CAMK2D,MICU1,TP53,MALT1,GCH1,SCUBE3,BCL10,TRABD2A,SCUBE1,P2RX6,NBR1,ATL2,SNX9,TOR1A,AMFR,MUC20,MLC1,AR,IDE,NACC1,SH3GLB1,AKR1C1/AKR1C2,CCDC88C,ECT2,PFKL	30
Hematological Disease, Immunological Disease, Infectious Diseases	infection	infection of lymphocytes	0.0169					CXCL12,FN1,CLEC4M,CD4,SLC2A1,CD40,TLR2,KLF2	8
Cell Cycle, Cell Morphology, Cellular Assembly and Organization, Cellular Function and Maintenance	length	length of telomeres	0.0169					POT1,SMG6,TERF1,RAD50,TINF2,CTC1,TPP2,MRE11	8
Carbohydrate Metabolism	phosphorylation	phosphorylation of carbohydrate	0.0169					POMK,AGK,TKFC,PI4K2A,PIP5K1C,GNPTG,SMG1,EFR3B	8
Cell Cycle	G2 phase	arrest in G2 phase of colorectal cancer cell lines	0.0169					MGMT,LIMK2,CHEK2,CELF2,CDKN1A,TP53,CHEK1	7
Cancer, Cell Cycle, Organismal Injury and Abnormalities	cell cycle progression	cell cycle progression of cancer cells	0.0169					LGALS12,CDKN1B,CDKN1A,TFCP2,FAS,TP53,DDR2	7
Cellular Assembly and Organization	quantity	quantity of vesicles	0.0169					PTEN,SNX9,CSF1,SYNJ2,SNX33,BECN1,MAP1LC3B	7
Hereditary Disorder, Immunological Disease, Organismal Injury and Abnormalities	familial autoimmune disease	familial autoimmune disease	0.0171					CCR7,CD59,ALG2,COL4A1,CD5,SELL,SLC6A5,COL4A4,PDCD1,CHRND,CDKN1B,IL7R,GLRB,FOXD3,FAS	15
Cancer, Hematological Disease, Immunological Disease, Organismal Injury and Abnormalities	B-cell lymphoma	B-cell lymphoma	0.0173					CCR7,ABCA13,SIGLEC10,CNTN4,RTN2,DCLK3,CHD6,CSE1L,KLF14,BCL10,TLL2,TLR2,PCLO,TAF1,CORO2A,KPNA1,TOP2A,USP22,PEG10,HSP90B1,ASAP2,BZW2,DUSP2,RRM1,ATP10A,DNAH5,DSC3,FAS,ARHGEF15,CXCL12,RASGRF1,FOXP1,TNRC6C,CLEC17A,EPHA3,FBN2,RNF213,IL6,ZNF37A,TP53,NOTCH2,GREB1,BTG2,RTTN,KIAA0100,HUWE1,ADAMTS15,ALDH1L2,MEF2B,ANKRD40,EIF4EBP1,FOXO1,POLE4,CD3G,CD58,CD5,LTA,TNFRSF8,GBP2,B2M,KLF2,AP4B1,OSBP,PDZD2,CAMTA1,TF…	144
Lipid Metabolism, Molecular Transport, Small Molecule Biochemistry	transport	transport of steroid	0.0175					PTCH1,ABCA5,NPC1L1,ABCC11,ABCG1,NPC2,CYP3A4,SLC10A2,PLD1,IL6,NFKBIA,APOC3,TP53,OSBP,APOB,LDLR,APOA1,CANX,AKR1C1/AKR1C2,LEP,STX12	21
Organismal Development	morphology	morphology of head	0.0176					PTCH1,PAX9,FRMD4A,TP53,EDA,AXIN2,DHFR,RSPRY1,HERC1,ATXN7,MAP3K7,PDGFRB,MED13L,C2CD3,PDGFRA,SOX5,SETBP1,NALCN,ADRA2B,ARX,RHO,SOX10,SUFU,FOXE1,KDM1A,TGIF1	26
Cell Morphology, Cellular Function and Maintenance	permeability	permeability of cells	0.0177					ANGPT4,ZG16B,AGER,CXCL12,COL4A1,PTEN,CREB1,ARHGAP35,CLMP,PXN,CAMK2D,MYADM,TIMP2,F2R,THBD,C5AR1,RAP1B,PLCG1,PROCR,NOS3,NT5E,F2	22
Cell-To-Cell Signaling and Interaction, Inflammatory Response	immune response	immune response of tumor cell lines	0.0177					PTEN,F2RL1,ATG5,DCAF1,FOXP1,LIMK1,IL6,TP53,DEF6,DICER1,CDKN1A,MET,EIF4EBP1,TOP2A,HSP90B1,CLTC,ENG,TIMD4,KLF2,BECN1,CDK5R1,GSTM4,WNT4,AXL,MSH2	25
Organismal Development, Organismal Injury and Abnormalities	abnormal morphology	abnormal morphology of head	0.0177					MAP3K7,PDGFRB,MED13L,C2CD3,PDGFRA,PTCH1,SOX5,PAX9,SETBP1,FRMD4A,NALCN,ADRA2B,ARX,EDA,SOX10,AXIN2,SUFU,FOXE1,DHFR,KDM1A,RSPRY1,HERC1,TGIF1	23
Cardiovascular Disease, Hereditary Disorder, Organismal Injury and Abnormalities	familial vascular disease	familial vascular disease	0.0177					PDGFRB,COL4A1,MED13L,PRKG1,LIMK1,FBN2,HTRA1,ADRA2B,KCNK3,BMPR2,SLC6A3,PRNP,EIF2AK4,SMAD3,SLC2A10,MYH11,MYLK,TMPO,TGFBR1,FAS,ADRA1A,MEF2A,HTR2A	23
Cell Morphology, Cellular Function and Maintenance	autophagy	autophagy of cells	0.0178					PTEN,ATG5,GTF2IRD2/GTF2IRD2B,PLD1,MTMR3,DICER1,CISD1,IKBKB,ENG,EPHB2,BECN1,GABARAPL1,DNAJA3,RPTOR,GRID2,TP73,VPS28,FAS,PPFIA4,CXCL12,AKT3,SCOC,IL6,TP53,SNAI1,LARP1,FN1,CHRND,TBC1D9B,DCN,TACR2,FOXO1,ATG14,NRBP2,CAPNS1,PINK1,MAP3K7,NBR1,KIF5C,AKT2,UBASH3B,EEF2K,KRT18,MAP1LC3B,SORCS2,CALCOCO2,NACC1,SH3GLB1,HIF1A,XBP1,ICMT,CHEK1	52
Cell-To-Cell Signaling and Interaction, Nervous System Development and Function	neurotransmission	neurotransmission	0.0181					NTSR1,CHRNA10,SRI,SNPH,CACNA1B,KCNK3,HOMER1,KCNQ2,GRM4,SYPL1,HAP1,PDE7B,SLC6A1,HTR2A,NPY,PSEN1,CHRNA5,CACNA1E,OMP,GABRR2,UNC119,GABARAP,SLC6A5,KCNE1,PRNP,CHRNB4,GLRB,SNAP29,CPLX1,KCNQ3,SPG11,SYT5	32
Cellular Assembly and Organization, Tissue Development	formation	formation of filaments	0.0182					GNG7,ARAP1,F2R,CORO7/CORO7-PAM16,FES,SKIL,F2,AKAP1,PSRC1,EML2,ARHGEF10,CCL11,DPYSL2,ADAMTS10,NCKIPSD,AR,LMCD1,SLIT2,NCK2,APOA1,CALD1,S1PR2,HCK,CREB1,NPR1,GNAO1,TNS4,TPM4,LMOD1,SEPT12,MYADM,ARRB1,FN1,TNS3,DLC1,RBBP4,TPM2,KCTD13,TPM1,SIRPA,TSC1,SH3PXD2A,CXXC5,ARFGEF1,LIMK2,CTTN,RP1,PAK1,FER,KLF2,RPS3,NCKAP1L,PHACTR1,GNG2,PAK4,ITM2B	56
Cancer, Hematological Disease, Immunological Disease, Organismal Injury and Abnormalities	diffuse small-cell lymphoma	diffuse small-cell lymphoma	0.0183					ABCA13,CNTN4,RTN2,DCLK3,CHD6,TLR2,PCLO,KPNA1,TOP2A,USP22,PEG10,HSP90B1,ASAP2,BZW2,DUSP2,RRM1,ATP10A,MTHFD1L,DNAH5,ARHGEF15,RASGRF1,CLEC17A,FBN2,ZNF37A,TP53,NOTCH2,GREB1,RTTN,KIAA0100,MEF2B,ANKRD40,EIF4EBP1,SLC29A2,POLE4,CD5,AP4B1,OSBP,PDZD2,UBE3A,TFCP2,DPH5,FILIP1L,PTEN,NDNF,SHROOM2,CSF3R,TRIP12,SHANK3,ING2,ELK1,LPIN1,RRM2,SHROOM3,OTUD7B,GNG4,CHD2,BCOR,POT1,MED1,CDH7,SLC6A5,STK38,GYS1,CLCC1,CCDC1…	97
Cell-To-Cell Signaling and Interaction	binding	binding of prostate cancer cell lines	0.0192					HS3ST3B1,CXCL12,PAK2,FGF19,KLK3,NFKBIA,AR,HAS2,VCAN,SMAD3,F3,ITGB3,GRK6,AFAP1	14
Neurological Disease, Organismal Injury and Abnormalities	seizure disorder	seizure disorder	0.0192					EFHC1,C9orf3,SNTB2,PRDM8,CEMIP,SLC6A13,CYYR1,PRICKLE2,FOSB,CHD2,TRIM9,ME2,BDNF,SCN3B,MICALL1,TMTC1,FGF12,ANOS1,DNAJB1,SCN8A,PCDH19,C1QB,ADRA2B,CAMKK1,CASR,NPRL3,DUSP2,LMCD1,PIGA,SLC6A3,CACNA2D2,ARHGEF9,KCNQ3,DEPDC5,CHST6,FBXO24,STRADA,GNAO1,CCR1,ST3GAL5,CACNA1B,KLF10,CACNA1I,CA5B,TBC1D24,ADGRV1,C11orf96,HOMER1,SLC22A11,KCNQ2,DHFR,LDLR,CDKN1A,SIGMAR1,ARID5B,EIF4A3,SLC6A1,SCN11A,APOL1,CACNA1D,ADRA1…	86
Connective Tissue Disorders, Developmental Disorder, Organismal Injury and Abnormalities, Skeletal and Muscular Disorders	dysplasia	dysplasia of bone	0.0192					SP7,MEOX1,ADRB1,COL27A1,COL1A1,ADRA2B,POLR1D,AMER1,PAM16,SFRP4,GHR,BMP1,CORO7/CORO7-PAM16,FKBP10,MET,ADRA1A,UFSP2,CRTAP	18
Organismal Injury and Abnormalities	pelvic pain	pelvic pain	0.0194					OXTR,AR,CHRNA5,CHRND,CHRNB4,CHRNA10,CACNA1B,CHRNA4,CACNA2D2,ESR1	10
Cardiovascular Disease, Organismal Injury and Abnormalities	tachycardia	tachycardia	0.0198					ADORA2A,DMPK,CALM1 (includes others),ADRB1,KCNA7,ANK2,ADRA2B,KCNE1,HCN4,ADORA2B,KCNK3,CACNA1C,KCNJ12,KCNJ5,CACNA2D2,TPM1,CACNA1D,RYR2,ADRA1A,MAOA	20
Cell Cycle	G2/M phase	G2/M phase of tumor cell lines	0.02					CDH13,ERCC1,PTEN,LIMK2,CHEK2,LIMK1,MYB,IL6,TP53,MGMT,AR,RBBP8,CSE1L,MXI1,NABP2,CELF2,SPHK2,CDKN1A,RPA1,LEP,CCNB1,MSH2,RBCK1,CHEK1	24
Cardiovascular System Development and Function, Cell-To-Cell Signaling and Interaction	binding	binding of endothelial cells	0.0204					S1PR2,AGER,CXCL12,CD226,CCR1,SELL,DGKE,PIK3R1,NFKBIA,MYADM,HAS2,F2R,FN1,PNPLA2,MET,DCN,ITGB3,NT5E,CD86,FOXO1,F2,WNT3A,NPY,ALCAM,RCAN1,RACK1,IKBKB,EGFL7,OLR1,ANGPTL1,PRKCA,TLR3,NRP1,SELPLG,TIMP3,STX6,SERPINE1,AXL,SERPING1	39
Cancer, Hematological Disease, Immunological Disease, Organismal Injury and Abnormalities	lymphocytic cancer	lymphoma	0.0206					CCR7,SIGLEC10,LPAR1,CCL8,SELL,RTN2,FNDC1,CLEC4G,CSE1L,KLF14,BCL10,RPA1,HDAC11,CORO2A,KPNA1,TOP2A,USP22,HSP90B1,CLMP,ASAP2,DUSP2,ATP10A,DNAH5,DSC3,FAS,TPO,RASGRF1,FOXP1,TNRC6C,CLEC17A,EPHA3,IL6,ZNF37A,R3HDM2,GREB1,ZNF490,BTG2,RTTN,ADAMTS15,ALDH1L2,PCDH17,ANKRD40,KLHL42,HTR2A,CD3G,OASL,CD58,ADRB1,OAS2,GBP2,MIA2,KLF2,UBE3A,NCAM1,CTSH,GART,LONRF2,DPH5,PTEN,NDNF,C3,CSF3R,ELK1,MAP1LC3C,SPIB,RRM2,SHROOM…	238
Cancer, Organismal Injury and Abnormalities, Renal and Urological Disease	urothelial cancer	urothelial cancer	0.0209					PTEN,CHEK2,PBRM1,NLRC5,SMC1A,CSF3R,EPHA3,PIK3R1,TP53,GATA3,CHD6,RRM2,AXIN2,BTG2,DHFR,CDKN1A,ZFP36L1,RXRA,SIN3A,NCOR1,ARID5B,ASXL1,TSC1,CASP2,FOXO1,TAF1,CIITA,GIPR,KRT7,TOP2A,ERCC2,POLE4,PDGFRA,HSP90B1,ARHGAP35,SETBP1,PDCD1,KHDRBS1,AR,RRM1,PI4K2A,FOXA1,CDKN1B,RUNX3	44
Cardiovascular Disease, Hematological Disease, Metabolic Disease	hypertriglyceridemia	Hypertriglyceridemia	0.021					CTSS,APOB,NPC1L1,CACNA1C,APOA1,SLC10A2,APOC3,CACNA1D,NNMT	9
Cellular Development, Connective Tissue Development and Function, Tissue Development	differentiation	differentiation of fibroblasts	0.021					HAS2,F2R,F2RL1,SLIT2,ITGA11,MAFG,MSTN,F2,FAAH	9
Infectious Diseases	infectivity	infectivity of HIV	0.021					CXCL12,FN1,NUP62,PRNP,CLEC4M,MAP1A,CD4,MVB12B,APOBEC3F	9
Cell Cycle	G1/S phase transition	G1/S phase transition of cervical cancer cell lines	0.021					WNK2,NASP,PHF8,SNX33,NFKBIA	5
Lipid Metabolism, Molecular Transport, Small Molecule Biochemistry	accumulation	accumulation of acylglycerol	0.021					LPIN1,KDM1A,FABP4,DGAT1,CASR	5
Cancer, Organismal Injury and Abnormalities	CD274 positive solid tumor	advanced CD274 positive solid tumor	0.021					RRM2,RRM1,POLE4,HSP90B1,PDCD1	5
Cancer, Cell Death and Survival, Organismal Injury and Abnormalities, Tumor Morphology	cell death	cell death of myeloma cells	0.021					B2M,FAS,CD40,IL6,CHEK1	5
Cell Morphology, Cellular Movement	cell spreading	cell spreading of brain cancer cell lines	0.021					FN1,PXN,PVR,TPM1,SIRPA	5
Cellular Development	differentiation	differentiation of colorectal cancer cell lines	0.021					PTEN,DICER1,CDKN1B,CDKN1A,GREM1	5
Cellular Development	differentiation	differentiation of prostate cancer cell lines	0.021					FOXA1,BMP4,PAK4,IL6,WNT3A	5
Connective Tissue Disorders, Developmental Disorder, Organismal Injury and Abnormalities, Skeletal and Muscular Disorders	dysplasia	dysplasia of hip bone	0.021					ADRB1,COL27A1,ADRA2B,ADRA1A,UFSP2	5
Cancer, Cellular Movement, Organismal Injury and Abnormalities	invasion	invasion of vascular endothelial cells	0.021					CHGA,THBD,SP100,KLK3,TIMP2	5
Organismal Injury and Abnormalities, Skeletal and Muscular Disorders	sarcopenia	sarcopenia	0.021					AR,LHCGR,IL6,MSTN,GDF11	5
Cellular Assembly and Organization, Cellular Function and Maintenance, Tissue Development	formation	formation of actin stress fibers	0.0211					S1PR2,CREB1,NPR1,GNAO1,TNS4,TPM4,GNG7,ARAP1,ARRB1,F2R,TNS3,DLC1,RBBP4,TPM2,KCTD13,TPM1,SIRPA,TSC1,SKIL,F2,AKAP1,CXXC5,LIMK2,ARHGEF10,CTTN,PAK1,NCKIPSD,KLF2,AR,LMCD1,PHACTR1,APOA1,GNG2,CALD1	34
Lipid Metabolism, Molecular Transport, Small Molecule Biochemistry	transport	transport of lipid	0.0211					PTCH1,ABCA5,ABCC11,PITPNA,NPC2,CYP3A4,SLC6A13,CHKA,PLD1,IL6,NFKBIA,APOC3,TP53,PITPNC1,LDLR,GLTP,ABCC6,CANX,ITGB3,STX12,F2,NPC1L1,ABCG1,SLC10A2,OSBP,APOB,APOA1,AKR1C1/AKR1C2,LEP	29
Cell-To-Cell Signaling and Interaction, Hematological System Development and Function, Inflammatory Response	binding	binding of blood platelets	0.0215					CXCL12,EFNB1,C3,ANXA5,DGKE,F5,CCL22,FN1,SELPLG,ITGB3,JAM3,TLR2,F2	13
Infectious Diseases	entrance	entrance of virus	0.0215					APLNR,NECTIN1,PDGFRA,PAK1,RAB11FIP5,ZNF639,ARRB1,PVR,PLCG1,CD4,ITGB3,AXL,WWP2	13
Hereditary Disorder, Neurological Disease, Organismal Injury and Abnormalities	idiopathic generalized epilepsy	idiopathic generalized epilepsy	0.0215					EFHC1,GABRG2,CASR,SLC2A1,GABRG1,SLC6A3,GABRG3,SLC12A5,RBFOX1,ME2,SLC6A1,HTR2A,HTR4	13
Cancer, Hematological Disease, Immunological Disease, Organismal Injury and Abnormalities	non-Hodgkin disease	non-Hodgkin disease	0.0219					CCR7,SIGLEC10,LPAR1,CCL8,SELL,RTN2,FNDC1,CLEC4G,CSE1L,KLF14,BCL10,RPA1,HDAC11,CORO2A,KPNA1,TOP2A,USP22,HSP90B1,ASAP2,DUSP2,ATP10A,DNAH5,DSC3,FAS,RASGRF1,FOXP1,TNRC6C,CLEC17A,EPHA3,IL6,ZNF37A,GREB1,BTG2,RTTN,ADAMTS15,ALDH1L2,PCDH17,ANKRD40,KLHL42,CD3G,OASL,CD58,OAS2,GBP2,MIA2,KLF2,UBE3A,NCAM1,CTSH,LONRF2,DPH5,PTEN,NDNF,C3,CSF3R,ELK1,SPIB,RRM2,SHROOM3,CAD,CHD2,CCR4,BCOR,POT1,HLA-DPB1,HDAC5,COL4A1,S…	213
Cancer, Ophthalmic Disease, Organismal Injury and Abnormalities	malignant neoplasm of eye	malignant neoplasm of eye	0.022					MALT1,GLTSCR2,VHL,PTEN,LOXL2,FOXP1,CDKN1A,CSF3R,TP73,CYP51A1,TP53	11
Cardiovascular Disease, Hematological Disease, Organismal Injury and Abnormalities	thrombus	thrombus	0.022					PDE4A,C3,MTHFR,COL1A1,CYP2C19,DGKE,IL6,PPP3CC,RRM2,F2R,GGCX,HABP2,PDE7B,ITGB3,VEGFC,ESR1,F2,PDGFRB,COL4A1,POLE4,PDGFRA,ANXA5,PPP3CB,F5,AR,EPO,RRM1,THBD,F3,PROCR,SERPINE1,NNMT	32
Lipid Metabolism, Molecular Transport, Small Molecule Biochemistry	secretion	secretion of lipid	0.0221					ABCG1,NPC2,BDKRB2,IL6,APOC3,AGK,ACSL4,FN1,BMP4,PNPLA2,APOA1,KCNJ5,PNPLA8,LEP,LHCGR,POMC,FFAR4,F2	18
Cardiovascular Disease	hypertension	Hypertension	0.0222					AGER,ZNF662,SLC12A3,KLF15,CHRNA10,CLCN6,FNDC1,FMO2,OLFML2A,LRIG1,NOS3,ZNF362,RBP5,SKIL,CORO2A,NPY,KYNU,PDE12,SEMA5B,EGFL7,AR,ROBO4,APOB,THNSL1,TMEM204,ZNF274,CACNA2D2,TMEM97,ARHGEF15,MRGPRF,PDE4A,NPR1,XPNPEP2,SNAP25,HPSE,FAF2,ZBTB16,CACNA1B,LMOD1,IL6,NDUFA4L2,CACNA1I,HOXA4,SLC12A2,C16orf45,VANGL2,CXXC4,RFTN2,HUWE1,NCS1,PDE7B,ECE1,ZNF823,SLC6A1,PAH,CDH13,ZNF154,PDGFRB,ITSN1,NPC1L1,ADRB1,ABHD4,LTA,…	154
Cellular Development, Connective Tissue Development and Function	adipogenesis	adipogenesis of cells	0.0223					ADORA2B,LPIN1,IL11,SREBF1,HSPA5,NPC2,FMO3,TRA2B	8
Cell Cycle, DNA Replication, Recombination, and Repair	checkpoint control	checkpoint control of tumor cell lines	0.0223					RBBP8,PTEN,TERF1,CHEK2,MCM7,CSNK1G1,TP53,CHEK1	8
Developmental Disorder, Hereditary Disorder, Neurological Disease, Organismal Injury and Abnormalities	nonsyndromic X-linked mental retardation	nonsyndromic X-linked mental retardation	0.0223					ACSL4,KIAA2022,ZNF41,SYP,ARHGEF6,ZNF81,OPHN1,ARX	8
Cellular Growth and Proliferation	proliferation	proliferation of eye cell lines	0.0223					TRPC4,EPO,TRIM39,SMAD3,CDKN1A,XBP1,PLD1,TP53	8
Molecular Transport	transport	transport of cation	0.0226					CCL8,CNGB1,CHP1,MICU1,IREB2,GPD1L,TRPM2,ATP2B2,F2R,ANO6,WNK3,SCN3B,NPY,TRPC4,KCNK17,KCNJ4,KCNS1,KCNJ5,FAS,KCNQ3,KCNAB1,SLC44A2,CALHM1,F2RL1,CCR1,RHBG,SLC12A2,KCNK3,KCNQ2,ANO1,KIF5B,KCNJ12,SEC14L1,SCN11A,APOL1,CACNA1D,HEPH,TMEM63C,KCNS3,SLC25A26,ATP6V1C1,SLC46A1,HCN4,HVCN1,KCNJ3,SLC25A23,KCNK6,SCNN1B,RYR2	49
Organismal Injury and Abnormalities	intracranial hemorrhage	intracranial hemorrhage	0.0227					CHRNA5,ADORA2A,COL4A1,PDE4A,CHRNA10,GABRG2,INSR,CACNA1B,ADRA2B,F5,GABRG1,ADORA2B,EPO,CHRND,CHRNB4,GABRG3,CACNA1C,F3,JAM3,CHRNA4,CACNA2D2,CACNA1D,F2	23
Cell-To-Cell Signaling and Interaction, Nervous System Development and Function	synaptic transmission	synaptic transmission	0.023					NTSR1,CHRNA10,SNPH,CACNA1B,KCNK3,HOMER1,KCNQ2,GRM4,SYPL1,HAP1,PDE7B,SLC6A1,HTR2A,NPY,PSEN1,CHRNA5,CACNA1E,OMP,GABRR2,UNC119,GABARAP,SLC6A5,PRNP,CHRNB4,GLRB,SNAP29,CPLX1,KCNQ3,SPG11,SYT5	30
Cell Death and Survival, Cell Morphology, Cellular Function and Maintenance	autophagic cell death	autophagic cell death	0.023					ATG5,SH3GLB1,CDKN1B,S1PR3,APOL1,BECN1	6
Cellular Development, Cellular Growth and Proliferation, Hematological System Development and Function, Hematopoiesis, Lymphoid Tissue Structure and Development, Tissue Development	differentiation	differentiation of CD34+ cells	0.023					DCBLD2,EPO,TCF3,PRKCA,CDKN1A,SPIB	6
Infectious Diseases	infection	infection of leukemia cell lines	0.023					CLEC4M,PAK1,SELPLG,FAS,AXL,KLF2	6
Cellular Assembly and Organization, Cellular Function and Maintenance	quantity	quantity of filopodia	0.023					HAS2,NTN1,MYL2,CRMP1,HOXA4,F2	6
Cellular Movement, Hematological System Development and Function, Hypersensitivity Response, Immune Cell Trafficking, Inflammatory Response	cell movement	cell movement of mast cells	0.0232					SEMA4D,CXCL12,C3,CD72,CD4,CCL11,VEGFC	7
Cardiovascular Disease, Hematological Disease, Hereditary Disorder, Metabolic Disease, Organismal Injury and Abnormalities	familial hypercholesterolemia	familial hypercholesterolemia	0.0232					APOB,LDLR,GHR,NPC1L1,PPP1R17,APOA1,F2	7
Cell Morphology	shape change	shape change of brain cancer cell lines	0.0232					FN1,NTN1,PXN,PVR,TPM1,SIRPA,F2	7
Developmental Disorder	midline defect	midline defect	0.0238					MED13L,MTR,SNAP25,PDGFRA,MTHFR,ADRA2B,VANGL2,AR,FOXE1,DHFR,KDM1A,MTHFD1L,BMP4,FUZ,ESR1	15
Cell-To-Cell Signaling and Interaction	adhesion	adhesion of prostate cancer cell lines	0.0243					CXCL12,PAK2,VCAN,SMAD3,FGF19,KLK3,ITGB3,NFKBIA,GRK6,AFAP1	10
Cardiovascular Disease, Organismal Injury and Abnormalities	ventricular tachycardia	ventricular tachycardia	0.0246					DMPK,CALM1 (includes others),ADRB1,KCNA7,ANK2,ADRA2B,KCNE1,HCN4,KCNK3,KCNJ12,KCNJ5,CACNA2D2,TPM1,RYR2,ADRA1A,MAOA	16
Cardiovascular Disease	vascular lesion	vascular lesion	0.0246					MICA,FBN2,MTHFR,HOXA4,FN1,SMAD3,MYH11,NOS3,TMPO,TGFBR1,PTGES,CTSS,GABRG2,PRKG1,ADRA2B,ELN,GABRG1,TIMP2,VHL,VCAN,GABRG3,SLC2A10,TIMP3,MYLK,APOA1,FAS	26
Hereditary Disorder, Organismal Injury and Abnormalities	X-linked hereditary disease	X-linked hereditary disease	0.0249					SLC12A3,C3,COL1A1,TMLHE,SYP,OCRL,ARHGEF6,AMER1,MBTPS2,GHR,XK,TIMM8A,PHF8,BCOR,SCN3B,TLR2,TAF1,HLA-DPB1,ZNF41,COL4A1,ANOS1,LMAN1,SCN8A,ENG,ADRA2B,AR,SHOX,PIGA,SLC6A3,POF1B,CALD1,CLCN4,IQSEC2,KIAA2022,PHKA2,MECP2,ZDHHC9,SMC1A,TPM4,RBMX,CA5B,EDA,GRIA3,ZNF81,HUWE1,F8,NLGN3,TLR6,LHCGR,SCN11A,ADRA1A,HTR2A,SMS,MAOA,CLCN5,GDI1,MAP3K7,VMA21,MYL2,ADRB1,OPHN1,MID2,ARX,RS1,PDCD1,ZNF7,ACSL4,NDP,LOXL2,HLA-A,TL…	83
Cancer, Gastrointestinal Disease, Organismal Injury and Abnormalities	small intestine cancer	small intestine cancer	0.0251					DNA2,PAM,FILIP1L,PTEN,C11orf57,FLCN,CLEC16A,MIS18BP1,ZDHHC14,PRDM8,DPAGT1,TMEM196,ANAPC1,TNPO1,GATA3,CDX2,PDCL3,BACE2,JARID2,SYNJ2,CHD2,LOC100288966/POTED,C11orf54,ASXL1,KRT7,BNC2,PRR11,TOP2A,DNAH7,LMAN1,ASAP2,ADAMTS10,RFX5,ACVR1B,MSH3,KNOP1,EML6,TBC1D23,RBBP8,BMPR2,UPF3A,WDR55,CRTC1,FKBP10,CASP5,IQSEC2,TMEM97,PBRM1,PTCH1,HIVEP3,ELAVL3,TNRC6C,EIF2B3,FRMD4A,ZNF517,NR2C2,TP53,ELMSAN1,AXIN2,SOHLH2,D…	92
Cancer, Hematological Disease, Immunological Disease, Organismal Injury and Abnormalities	diffuse B-cell lymphoma	diffuse B-cell lymphoma	0.0256					ABCA13,SIGLEC10,CNTN4,RTN2,DCLK3,CHD6,KLF14,TLL2,TLR2,PCLO,CORO2A,KPNA1,TOP2A,USP22,PEG10,HSP90B1,ASAP2,BZW2,DUSP2,RRM1,ATP10A,DNAH5,DSC3,ARHGEF15,RASGRF1,FOXP1,TNRC6C,CLEC17A,EPHA3,FBN2,ZNF37A,TP53,NOTCH2,GREB1,RTTN,KIAA0100,HUWE1,ADAMTS15,ALDH1L2,MEF2B,ANKRD40,EIF4EBP1,POLE4,CD3G,CD58,CD5,TNFRSF8,B2M,KLF2,AP4B1,OSBP,PDZD2,CAMTA1,TFCP2,LONRF2,DPH5,TRIM67,FILIP1L,PTEN,NDNF,SHROOM2,GET4,CSF3R,ZIC4…	125
Cancer, Organismal Injury and Abnormalities	chondrosarcoma	chondrosarcoma	0.0257					AGER,TOP2A,PDGFRB,EXT1,PDGFRA,PTCH1,IL6,TP53,IGF2R,SUFU,LOXL2,NRP1,CDKN1A	13
Hematological Disease, Immunological Disease	lymphoproliferative disorder	lymphoproliferative disorder	0.0257					SIGLEC10,CCL8,RTN2,CLEC4G,LILRB4,FAM104B,KLF14,AMER3,MTO1,IL1RL2,RPA1,TOP2A,USP22,SEMA5B,RBM7,CLMP,ASAP2,THEM4,LYZ,ATP10A,TAP2,NRP1,ZNF423,ZNF277,FCMR,RASGRF1,XPNPEP2,ANKRD22,MAGI2,IL6,R3HDM2,GREB1,CCDC40,ALDH1L2,PDE7B,SIN3A,PCDH17,ANKRD40,AMOT,CD3G,CD58,NASP,ADRB1,OAS2,BAG1,LPP,ATAD1,FAM120B,PCNX4,UBE3A,HVCN1,NCAM1,GART,LONRF2,STOX2,ELK1,SPIB,RRM2,SMG6,PTPN21,ECHDC3,BCOR,COL4A1,SP100,SLC6A5,STK3…	542
Metabolic Disease, Neurological Disease, Organismal Injury and Abnormalities, Psychological Disorders	Alzheimer disease	Braak stage I-II Alzheimer disease	0.0258					TP73,MAOA	2
Cardiovascular Disease, Hematological Disease, Infectious Diseases, Organismal Injury and Abnormalities, Skeletal and Muscular Disorders	Chagas cardiomyopathy	Chagas cardiomyopathy	0.0258					ADRB1,CSF3R	2
Connective Tissue Disorders, Developmental Disorder, Hereditary Disorder, Organismal Injury and Abnormalities, Skeletal and Muscular Disorders	Megarbane-Dagher-Melki type spondylometaphyseal dysplasia	Megarbane-Dagher-Melki type spondylometaphyseal dysplasia	0.0258					PAM16,CORO7/CORO7-PAM16	2
Developmental Disorder, Hereditary Disorder, Organismal Injury and Abnormalities, Renal and Urological Disease, Reproductive System Disease	X-linked hypospadias	X-linked hypospadias	0.0258					AR,MAMLD1	2
Lipid Metabolism, Molecular Transport, Small Molecule Biochemistry	accumulation	accumulation of asialo GM2 ganglioside	0.0258					GM2A,HEXA	2
Hematological Disease	activated protein C resistance	activated protein C resistance	0.0258					F8,F5	2
Cancer, Cell-To-Cell Signaling and Interaction, Organismal Injury and Abnormalities	activation	activation of chronic lymphocytic leukemia B cells	0.0258					SEMA4D,PLXNB1	2
Cell-To-Cell Signaling and Interaction, Hematological System Development and Function, Immune Cell Trafficking, Inflammatory Response	activation	activation of naive T lymphocytes	0.0258					CD28,CD4	2
Cardiovascular System Development and Function, Cell-To-Cell Signaling and Interaction	adhesion	adhesion of high endothelial postcapillary venule	0.0258					SELL,AOC3	2
Cell-To-Cell Signaling and Interaction, Cellular Compromise, Tumor Morphology	adhesion	adhesion of ovarian cancer cells	0.0258					BMP4,AKT2	2
Cell-To-Cell Signaling and Interaction, Hematological System Development and Function, Immune Cell Trafficking, Inflammatory Response	aggregation	aggregation of T lymphocytes	0.0258					ATRN,TLR2	2
Cancer, Cell Death and Survival, Organismal Injury and Abnormalities, Tumor Morphology	apoptosis	apoptosis of nasopharyngeal carcinoma cells	0.0258					FAS,TP53	2
Cancer, Cell Cycle, Organismal Injury and Abnormalities	G1 phase	arrest in G1 phase of carcinoma cells	0.0258					PTEN,DCN	2
Cell Cycle	G2 phase	arrest in G2 phase of mammary epithelial cells	0.0258					CDKN1A,CHEK1	2
Cell Cycle	G2/M phase	arrest in G2/M phase of myeloma cell lines	0.0258					IL6,CCNB1	2
Cell Cycle	G2/M phase transition	arrest in G2/M phase transition of bladder cancer cell lines	0.0258					CDKN1A,TP53	2
Cell Cycle	interphase	arrest in interphase of skin cancer cell lines	0.0258					CDH13,CDKN1B	2
Cell Cycle	sub-G1 phase	arrest in sub-G1 phase of lymphoma cell lines	0.0258					CDKN1A,FOXO1	2
Cell-To-Cell Signaling and Interaction	attachment	attachment of fibrosarcoma cell lines	0.0258					MGAT5,BCAM	2
Cell Morphology, Cellular Function and Maintenance	autophagy	autophagy of Cytoplasm	0.0258					TP53,BECN1	2
Hereditary Disorder, Neurological Disease, Organismal Injury and Abnormalities	benign familial neonatal seizures	benign familial neonatal seizures	0.0258					KCNQ2,KCNQ3	2
Cell Cycle, Gene Expression	binding	binding of Myb binding site	0.0258					ELF4,MYB	2
Cell Cycle	cell cycle progression	cell cycle progression of endometrial cancer cell lines	0.0258					PTEN,INSR	2
Cancer, Cell Cycle, Organismal Injury and Abnormalities	cell cycle progression	cell cycle progression of glioma cells	0.0258					FAS,TP53	2
Cell Death and Survival	cell death	cell death of pro-B lymphocytes	0.0258					FAS,VAV3	2
Cellular Movement	cell movement	cell movement of pancreatic cancer cells	0.0258					GDNF,TGFBR1	2
Cellular Movement	cell rolling	cell rolling of lymphoma cell lines	0.0258					SELL,SELPLG	2
Cardiovascular Disease, Hematological Disease, Organismal Injury and Abnormalities	central venous catheter-associated thrombosis	central venous catheter-associated thrombosis	0.0258					F5,F2	2
Cell Cycle, DNA Replication, Recombination, and Repair	checkpoint control	checkpoint control of lymphoma cell lines	0.0258					CHEK2,CHEK1	2
Cellular Movement	chemotaxis	chemotaxis of bone marrow cell lines	0.0258					CXCL12,FAS	2
Cellular Movement	chemotaxis	chemotaxis of cancer cells	0.0258					CXCL12,GDNF	2
Cell Morphology, Cellular Assembly and Organization, Cellular Development, Cellular Function and Maintenance, Cellular Growth and Proliferation	ciliogenesis	ciliogenesis of tumor cell lines	0.0258					VHL,CETN2	2
Cellular Growth and Proliferation	colony formation	colony formation of adenocarcinoma cell lines	0.0258					DNAJA3,FAM57A	2
Dermatological Diseases and Conditions, Infectious Diseases, Organismal Injury and Abnormalities	complicated skin and skin structure infection	complicated skin and skin structure infection	0.0258					TOP2A,DHFR	2
Cardiovascular System Development and Function, Cell Morphology	contraction	contraction of vascular endothelial cells	0.0258					LPAR6,F2R	2
DNA Replication, Recombination, and Repair	conversion	conversion of DNA	0.0258					DHX36,FTH1	2
Post-Translational Modification	conversion	conversion of protein	0.0258					PADI4,TP53	2
Ophthalmic Disease, Organismal Injury and Abnormalities	corneal opacity	corneal opacity	0.0258					PXDN,APOA1	2
Cell Death and Survival	cytolysis	cytolysis of neuroblastoma cell lines	0.0258					CD59,CD55	2
DNA Replication, Recombination, and Repair	deletion	deletion of DNA	0.0258					TERF2,XRCC3	2
Cell Morphology, Cellular Function and Maintenance	depolarization	depolarization of epithelial cell lines	0.0258					SCN11A,BDNF	2
Cell Morphology, Cellular Function and Maintenance	depolarization	depolarization of kidney cell lines	0.0258					SCN11A,BDNF	2
Cell Morphology, Cellular Function and Maintenance	depolarization	depolarization of neuroblastoma cell lines	0.0258					SCN11A,BDNF	2
Cellular Response to Therapeutics	doxorubicin sensitivity	doxorubicin sensitivity of tumor cell lines	0.0258					TRPM2,TP53	2
Cellular Function and Maintenance, Molecular Transport	efflux	efflux of K+	0.0258					FAS,APOL1	2
Cell Morphology, Cellular Assembly and Organization, Nervous System Development and Function	elongation	elongation of axons	0.0258					SLIT2,DPYSL2	2
Infectious Diseases	entrance	entrance of Bovine herpesvirus 1	0.0258					NECTIN1,PVR	2
Infectious Diseases	entrance	entrance of Pseudorabies virus	0.0258					NECTIN1,PVR	2
Cell Cycle	M phase	exit from M phase of tumor cell lines	0.0258					MCM7,MYB	2
Connective Tissue Disorders, Hereditary Disorder, Organismal Injury and Abnormalities, Respiratory Disease	familial interstitial lung disease	familial interstitial lung disease	0.0258					COPA,SFTPA2	2
Reproductive System Development and Function	fertility	fertility	0.0258					AR,LHCGR	2
Cell Morphology, Cell-To-Cell Signaling and Interaction, Cellular Assembly and Organization, Cellular Function and Maintenance	formation	formation of actin filopodia	0.0258					TNFRSF1A,CSF1	2
Cellular Assembly and Organization, DNA Replication, Recombination, and Repair	formation	formation of telomeres	0.0258					TERF2,TP53	2
Cellular Assembly and Organization, DNA Replication, Recombination, and Repair	formation	formation of telomeric loops	0.0258					TERF2,TP53	2
Organismal Functions	healing	healing of bladder cancer cell lines	0.0258					GRN,PXN	2
Cancer, Gastrointestinal Disease, Hereditary Disorder, Organismal Injury and Abnormalities	hereditary mixed polyposis syndrome	hereditary mixed polyposis syndrome	0.0258					BMPR1A,GREM1	2
Drug Metabolism	hydroxylation	hydroxylation of diazepam	0.0258					CYP3A4,CYP2C19	2
Cardiovascular Disease, Hematological Disease, Neurological Disease, Organismal Injury and Abnormalities	idiopathic cerebral vein thrombosis	idiopathic cerebral vein thrombosis	0.0258					F5,F2	2
Infectious Diseases	infection	infection of colorectal cancer cell lines	0.0258					PICALM,CD55	2
Cancer, Cell Cycle, Organismal Injury and Abnormalities	interphase	interphase of colon carcinoma cells	0.0258					CDKN1A,DCN	2
Cancer, Cellular Movement, Endocrine System Disorders, Gastrointestinal Disease, Organismal Injury and Abnormalities, Tumor Morphology	invasion	invasion of pancreatic cancer cells	0.0258					HPSE,TGFBR1	2
Cellular Development	lifespan	lifespan of chronic lymphocytic leukemia B cells	0.0258					SEMA4D,PLXNB1	2
Neurological Disease, Skeletal and Muscular Disorders	lower limb spasticity	lower limb spasticity	0.0258					SNAP25,DARS	2
Small Molecule Biochemistry	metabolism	metabolism of glyoxylic acid	0.0258					AGXT,HOGA1	2
Cancer, Organismal Injury and Abnormalities	metastatic potential	metastatic potential of breast cancer cell lines	0.0258					CPEB2,GRHL2	2
Cardiovascular System Development and Function, Cellular Movement	migration	migration of endothelial colony-forming cells	0.0258					CXCL12,VASH1	2
Cellular Movement	migration	migration of smooth muscle cell lines	0.0258					SSH1,LPP	2
Cellular Assembly and Organization, Cellular Function and Maintenance	mislocalization	mislocalization of actin stress fibers	0.0258					TRIP6,ENG	2
Cell Morphology	morphology	morphology of bladder cancer cell lines	0.0258					CDKN1A,FOSL1	2
Cell Morphology, Embryonic Development, Nervous System Development and Function, Organ Development, Organ Morphology, Organismal Development, Tissue Development, Tissue Morphology, Visual System Development and Function	morphology	morphology of photoreceptors	0.0258					RHO,TP53	2
Cellular Assembly and Organization, Cellular Function and Maintenance	organization	organization of transitional elements	0.0258					SEC16B,SEC16A	2
Connective Tissue Disorders, Developmental Disorder, Hereditary Disorder, Metabolic Disease, Organismal Injury and Abnormalities, Skeletal and Muscular Disorders	osteogenesis imperfecta type XII	osteogenesis imperfecta type XII	0.0258					SP7,FKBP10	2
Hematological Disease	pancytopenia	pancytopenia	0.0258					AR,SAMD9L	2
Cancer, Organismal Injury and Abnormalities, Respiratory Disease	pleuropulmonary blastoma	pleuropulmonary blastoma	0.0258					DICER1,TP53	2
Developmental Disorder, Hereditary Disorder, Metabolic Disease, Organismal Injury and Abnormalities, Skeletal and Muscular Disorders	polyglucosan body myopathy	polyglucosan body myopathy	0.0258					GYG1,RBCK1	2
Developmental Disorder, Neurological Disease, Organismal Injury and Abnormalities, Psychological Disorders	primary progressive aphasia	primary progressive aphasia	0.0258					GRN,PRNP	2
Cellular Development, Cellular Growth and Proliferation, Embryonic Development, Organismal Development, Tissue Development	proliferation	proliferation of extravillous trophoblast cells	0.0258					F2R,F2	2
Cardiovascular Disease, Organismal Injury and Abnormalities, Respiratory Disease	pulmonary veno-occlusive disease	pulmonary veno-occlusive disease	0.0258					BMPR2,EIF2AK4	2
Hematological System Development and Function, Lymphoid Tissue Structure and Development, Tissue Morphology	quantity	quantity of Th2 cells	0.0258					GATA3,CD28	2
Carbohydrate Metabolism, Molecular Transport, Small Molecule Biochemistry	quantity	quantity of keratan sulfate	0.0258					CHST6,CHST1	2
Lipid Metabolism, Molecular Transport, Small Molecule Biochemistry, Vitamin and Mineral Metabolism	quantity	quantity of vitamin A	0.0258					APOA1,APOC3	2
Molecular Transport	release	release of iodide	0.0258					F2R,F2	2
Small Molecule Biochemistry	release	release of taurine	0.0258					F2R,F2	2
Cardiovascular Disease, Organismal Injury and Abnormalities	reperfusion injury	reperfusion injury of organ	0.0258					SERPING1,TLR2	2
Cellular Compromise	retraction	retraction of cervical cancer cell lines	0.0258					PAK1,PRKG1	2
Cardiovascular System Development and Function, Cellular Compromise	retraction	retraction of vascular endothelial cells	0.0258					C5AR1,PRKG1	2
Cell Death and Survival, Cellular Development, Cellular Function and Maintenance	self-renewal	self-renewal of colorectal cancer cell lines	0.0258					MGAT5,PLD1	2
Molecular Transport	sequestration	sequestration of iron ion	0.0258					SRI,FTH1	2
Organ Morphology	size	size of exocrine gland	0.0258					ABCC11,EDA	2
Cell Morphology, Cellular Assembly and Organization, Nervous System Development and Function, Tissue Morphology	size	size of perikaryon	0.0258					GDNF,BDNF	2
Cardiovascular System Development and Function, Cellular Development, Cellular Function and Maintenance, Cellular Growth and Proliferation, Organismal Development, Tissue Development	sprouting angiogenesis	sprouting angiogenesis of vascular endothelial cells	0.0258					KLHL20,ECT2	2
Neurological Disease, Organismal Injury and Abnormalities	symptomatic epilepsy	symptomatic epilepsy	0.0258					STRADA,ST3GAL5	2
Lipid Metabolism, Small Molecule Biochemistry	synthesis	synthesis of 11,12-epoxyeicosatrienoic acid	0.0258					CYP3A4,OLR1	2
Lipid Metabolism, Small Molecule Biochemistry	synthesis	synthesis of monounsaturated fatty acids	0.0258					SREBF1,DGAT1	2
Hematological Disease, Hereditary Disorder, Organismal Injury and Abnormalities	thrombophilia due to thrombin defect	thrombophilia due to thrombin defect	0.0258					F5,F2	2
Visual System Development and Function	transduction	transduction of light stimulus	0.0258					RP1,GNAT1	2
Cancer	transformation	transformation of colorectal cancer cell lines	0.0258					CDKN1A,PAK4	2
Cellular Movement, Hematological System Development and Function, Immune Cell Trafficking	transmigration	transmigration of B-lymphocyte derived cell lines	0.0258					CXCL12,ENG	2
Lipid Metabolism, Molecular Transport, Small Molecule Biochemistry, Vitamin and Mineral Metabolism	uptake	uptake of vitamin E	0.0258					NPC1L1,SEC14L2	2
Nervous System Development and Function, Tissue Morphology	volume	volume of gray matter	0.0258					OXTR,BDNF	2
Psychological Disorders	schizophrenia spectrum disorder	schizophrenia spectrum disorder	0.0264					GTPBP1,CHRNA10,RTN2,GRM4,POMC,PCLO,NPY,SOX5,DPYSL2,MLC1,CPLX2,APOB,APOA1,CRHBP,CACNA2D2,CPLX1,GTF2IRD1,GNAI1,CXCL12,CELF6,SNAP25,KLF12,GRID1,CACNA1B,MAGI2,IL6,CACNA1I,APOL4,SLC12A2,SNAP23,BTG2,NCS1,POC1B-GALNT4,SIGMAR1,SLC6A1,SCN11A,GRIK3,APOL1,PAH,HTR2A,IPCEF1,FRRS1,SREBF1,ADRB1,UBE3A,SND1,NCAM1,CELF2,SLC12A5,GLRB,GNG2,RGS4,APOL2,HSPA2,PTEN,LMO4,HINT1,C3,DISC1,SHANK3,CYP3A4,TMLHE,NFKBIA,ELK1,ATP…	124
Infectious Diseases	infection	infection by Retroviridae	0.0265					PPP2R5E,PDSS1,TERF2,DCAF1,CHRNA10,PDIA6,HID1,RTN2,GHR,ZC3H7B,PIP5K1C,TLR2,MPP2,MRPL10,SSU72,TOP2A,ERICH6B,SEMA5B,SENP5,UBE2H,RBM7,UAP1,H3F3A/H3F3B,REPIN1,CCL11,DHX33,AR,PSMD12,NECAB3,FABP1,RRM1,CAPN6,MRPL44,RAP1B,APOA1,BCLAF1,CACNA2D2,FAS,GML,CXCL12,ERCC1,NUP62,PDE4A,FPGS,GM2A,ST3GAL5,PHF2,KDM4D,SLC22A11,SLU7,BTG2,FN1,ACADSB,HUWE1,PDE7B,RANBP17,SIGMAR1,ZNF785,R3HDM1,SHCBP1,HLA-DOA,ASXL2,NPC1L1,PA…	182
Cellular Movement, Embryonic Development	migration	migration of embryonic cells	0.0266					S1PR2,CXCL12,GDNF,PDGFRB,IL11,FN1,CCL8,PDGFRA,HIF1A	9
Cell-To-Cell Signaling and Interaction, Cellular Assembly and Organization	quantity	quantity of actin stress fibers	0.0266					AGER,FN1,GAB2,PAK1,ARHGAP35,INSR,RBBP4,ARAP1,F2	9
Cancer, Hematological Disease, Immunological Disease, Organismal Injury and Abnormalities	lymphoproliferative malignancy	lymphoproliferative malignancy	0.0268					SIGLEC10,CCL8,RTN2,CLEC4G,LILRB4,FAM104B,KLF14,AMER3,MTO1,IL1RL2,RPA1,TOP2A,USP22,SEMA5B,RBM7,CLMP,ASAP2,THEM4,LYZ,ATP10A,TAP2,NRP1,ZNF423,ZNF277,FCMR,RASGRF1,XPNPEP2,ANKRD22,MAGI2,IL6,R3HDM2,GREB1,CCDC40,ALDH1L2,PDE7B,SIN3A,PCDH17,ANKRD40,AMOT,CD3G,CD58,NASP,ADRB1,OAS2,BAG1,LPP,ATAD1,FAM120B,PCNX4,UBE3A,HVCN1,NCAM1,GART,LONRF2,STOX2,ELK1,SPIB,RRM2,SMG6,PTPN21,ECHDC3,BCOR,COL4A1,SP100,SLC6A5,STK3…	541
Cardiovascular Disease, Organismal Injury and Abnormalities	embolus	embolus	0.0269					RRM2,EPO,F2R,GGCX,RRM1,POLE4,HABP2,MTHFR,PROCR,F5,F2	11
Tox Functions
Categories	Functions	Diseases or Functions Annotation	p-Value	Predicted Activation State	Activation z-score	Notes	Bias-corrected z-score	Molecules	# Molecules
Liver Hyperplasia/Hyperproliferation	cancer	liver cancer	0.00111					GTF2B,PAOX,RIC8A,KIAA1217,TESPA1,TTC29,KLF14,AMER3,SORL1,MTO1,LUZP2,CDRT1,TOP2A,HDX,SEMA5B,AMFR,ASAP2,SAMD9L,SEMA4B,LRRN4CL,DENND2A,TCERG1L,TMCC3,TTC28,KIAA0355,RASGRF1,PLA2G4E,HOXA4,AGK,NLRP10,CCDC40,ZNF280D,DCN,STRIP1,CDH13,AMOT,VMA21,PSTPIP2,NASP,HOXD12,CEP44,ZBTB17,ARMC5,MXD3,TM9SF4,SKIDA1,NPLOC4,FAM46A,MASP1,RNF220,CHDH,NCKAP1L,OSBPL11,RGS4,LONRF2,MIER1,ZMYM4,PRRG3,ZNF790,SKA3,MYEF2,ELK1,TME…	1076
Liver Hyperplasia/Hyperproliferation	liver carcinoma	liver carcinoma	0.00113					GTF2B,PAOX,RIC8A,KIAA1217,TESPA1,TTC29,KLF14,AMER3,SORL1,MTO1,LUZP2,CDRT1,TOP2A,HDX,SEMA5B,AMFR,ASAP2,SAMD9L,SEMA4B,LRRN4CL,DENND2A,TCERG1L,TMCC3,TTC28,KIAA0355,RASGRF1,PLA2G4E,HOXA4,AGK,NLRP10,CCDC40,ZNF280D,DCN,STRIP1,CDH13,AMOT,VMA21,PSTPIP2,NASP,HOXD12,CEP44,ZBTB17,ARMC5,MXD3,TM9SF4,SKIDA1,NPLOC4,FAM46A,RNF220,CHDH,NCKAP1L,OSBPL11,RGS4,LONRF2,MIER1,ZMYM4,PRRG3,ZNF790,SKA3,MYEF2,ELK1,TMEM127,A…	1053
Liver Hyperplasia/Hyperproliferation	liver tumor	liver tumor	0.00128					GTF2B,PAOX,RIC8A,KIAA1217,TESPA1,TTC29,KLF14,AMER3,SORL1,MTO1,LUZP2,CDRT1,TOP2A,HDX,SEMA5B,AMFR,ASAP2,SAMD9L,SEMA4B,LRRN4CL,DENND2A,TCERG1L,TMCC3,TTC28,KIAA0355,RASGRF1,PLA2G4E,SLCO4A1,HOXA4,AGK,NLRP10,CCDC40,ZNF280D,DCN,STRIP1,CDH13,AMOT,VMA21,PSTPIP2,NASP,HOXD12,CEP44,ZBTB17,ARMC5,MXD3,TM9SF4,SKIDA1,NPLOC4,FAM46A,MASP1,RNF220,CHDH,NCKAP1L,OSBPL11,RGS4,LONRF2,MIER1,ZMYM4,PRRG3,ZNF790,SKA3,MYEF2,…	1099
Heart Failure	sudden cardiac death	sudden cardiac death	0.00329					GPD1L,NEBL,DPP6,CACNA1C,ANK2,SCN3B,RYR2	7
Cardiac Arrythmia, Tachycardia	hemodynamically unstable ventricular tachycardia	hemodynamically unstable ventricular tachycardia	0.00816					KCNK3,ADRB1,KCNA7,KCNJ12,KCNJ5,CACNA2D2,KCNE1	7
Cardiac Arrythmia	recurrent ventricular fibrillation	recurrent ventricular fibrillation	0.00816					KCNK3,ADRB1,KCNA7,KCNJ12,KCNJ5,CACNA2D2,KCNE1	7
Cardiac Arrythmia, Tachycardia	tachycardia	tachycardia	0.0198					ADORA2A,DMPK,CALM1 (includes others),ADRB1,KCNA7,ANK2,ADRA2B,KCNE1,HCN4,ADORA2B,KCNK3,CACNA1C,KCNJ12,KCNJ5,CACNA2D2,TPM1,CACNA1D,RYR2,ADRA1A,MAOA	20
Cardiac Arrythmia, Tachycardia	ventricular tachycardia	ventricular tachycardia	0.0246					DMPK,CALM1 (includes others),ADRB1,KCNA7,ANK2,ADRA2B,KCNE1,HCN4,KCNK3,KCNJ12,KCNJ5,CACNA2D2,TPM1,RYR2,ADRA1A,MAOA	16
Pulmonary Hypertension	pulmonary veno-occlusive disease	pulmonary veno-occlusive disease	0.0258					BMPR2,EIF2AK4	2
Heart Failure	cardiac death	cardiac death	0.0289					GPD1L,NEBL,DPP6,CACNA1C,ANK2,CYP2C19,SCN3B,RYR2	8
Hepatocellular Carcinoma, Liver Hyperplasia/Hyperproliferation	hepatocellular carcinoma	progressive hepatocellular carcinoma	0.032					TOP2A,SREBF1,MET	3
Heart Failure	failure	failure of heart	0.0382					PPP2R5E,CXCL12,PDE4A,NPR1,SLC12A3,ERBIN,KLF15,KCNA7,DPP6,CACNA1B,PPP2R3A,CYP2C19,IL6,PPP3CC,CA5B,SLC12A2,KCNK3,GPD1L,DHFR,IL1R1,DICER1,GHR,PDE7B,KCNJ12,SCN3B,CACNA1D,ADRA1A,GABRG2,MYL2,ADRB1,PPP3CB,ANK2,ADRA2B,KCNE1,GABRG1,AR,EPO,GABRG3,NEBL,SLC12A5,CACNA1C,SCNN1B,KCNJ5,AOC3,VDR,SERPINE1,CACNA2D2,RYR2	48
Liver Hyperplasia/Hyperproliferation	liver cholangiocarcinoma	metastatic liver cholangiocarcinoma	0.0425					RRM2,RRM1,POLE4,HSP90B1	4
Liver Hyperplasia/Hyperproliferation	liver cholangiocarcinoma	stage III liver cholangiocarcinoma	0.0425					RRM2,RRM1,POLE4,HSP90B1	4
Liver Hyperplasia/Hyperproliferation	liver cholangiocarcinoma	stage IVA liver cholangiocarcinoma	0.0425					RRM2,RRM1,POLE4,HSP90B1	4
Liver Hyperplasia/Hyperproliferation	liver cholangiocarcinoma	unresectable liver cholangiocarcinoma	0.0425					RRM2,RRM1,POLE4,HSP90B1	4
Liver Hyperplasia/Hyperproliferation	hepatosplenic T-cell lymphoma	refractory hepatosplenic T-cell lymphoma	0.0565					RRM2,RRM1,POLE4	3
Liver Hyperplasia/Hyperproliferation	hepatosplenic T-cell lymphoma	relapsed hepatosplenic T-cell lymphoma	0.0565					RRM2,RRM1,POLE4	3
Liver Hyperplasia/Hyperproliferation	liver cholangiocarcinoma	resectable liver cholangiocarcinoma	0.0565					RRM2,RRM1,POLE4	3
Cardiac Arrythmia	arrhythmia	arrhythmia of heart ventricle	0.0652					DMPK,CALM1 (includes others),ADRB1,KCNA7,DPP6,ANK2,ADRA2B,KCNE1,HCN4,KCNK3,CACNA1C,KCNJ12,KCNJ5,CACNA2D2,TPM1,CACNA1D,RYR2,ADRA1A,MAOA	19
Pulmonary Hypertension	pulmonary hypertension	Pulmonary Hypertension	0.0673					PDE4A,NPR1,CHRNA10,CACNA1B,CA5B,KCNK3,CHRND,PDE7B,CACNA1D,CHRNA5,PDGFRB,ITSN1,PDGFRA,GABRG2,ADRB1,ADRA2B,GABRG1,AR,BMPR1A,BMPR2,CHRNB4,EIF2AK4,GABRG3,CACNA1C,SERPINE1,CHRNA4,DDR2	27
Liver Hyperplasia/Hyperproliferation	proliferation	proliferation of liver cancer cells	0.069					PEG10,HPN	2
Liver Hyperplasia/Hyperproliferation	liver cholangiocarcinoma	liver cholangiocarcinoma	0.0709					KRT7,RRM2,RRM1,CDX2,POLE4,HSP90B1	6
Cardiac Arrythmia, Tachycardia	catecholaminergic polymorphic ventricular tachycardia type 1	catecholaminergic polymorphic ventricular tachycardia type 1	0.0787					DMPK,CALM1 (includes others),ANK2,TPM1,RYR2	5
Cardiac Arrythmia, Congenital Heart Anomaly	congenital long QT syndrome	congenital long QT syndrome	0.0787					CALM1 (includes others),CACNA1C,KCNJ5,ANK2,KCNE1	5
Renal Inflammation, Renal Nephritis	pyelonephritis	pyelonephritis	0.0873					TOP2A,DHFR,IL6	3
Cardiac Dysfunction	diastolic dysfunction	diastolic dysfunction	0.0881					AR,NPR1,ADRB1,CACNA1C,CACNA1D,RYR2	6
Liver Inflammation/Hepatitis	acute alcoholic hepatitis	acute alcoholic hepatitis	0.0999					ADORA2A,IL1R1,PDE4A,TNFRSF1A,PDE7B	5
Cardiac Arrythmia, Tachycardia	paroxysmal supraventricular tachycardia	paroxysmal supraventricular tachycardia	0.111					ADORA2B,ADORA2A,ADRB1,CACNA1C,ADRA2B,CACNA1D,ADRA1A	7
Cardiac Arrythmia	ventricular fibrillation	ventricular fibrillation	0.116					ADRB1,KCNA7,DPP6,ADRA2B,KCNE1,KCNK3,CACNA1C,KCNJ12,KCNJ5,CACNA2D2,RYR2,ADRA1A,MAOA	13
Cardiac Arrythmia	familial sick sinus syndrome	familial sick sinus syndrome	0.124					HCN4,CACNA1D	2
Renal Damage	injury	injury of kidney	0.124					FABP1,TLR2	2
Cardiac Proliferation	proliferation	proliferation of cardiomyocytes	0.124					TP73,LEP	2
Cardiac Infarction	myocardial infarction	recurrent myocardial infarction	0.124					VDR,ITGB3	2
Liver Steatosis	hepatic steatosis	severe hepatic steatosis	0.124					AR,ESR1	2
Cardiac Arteriopathy	premature coronary artery disease	early-onset premature coronary artery disease	0.124					LDLR,ABCG1,APOA1	3
Liver Necrosis/Cell Death	apoptosis	apoptosis of hepatocytes	0.124					TNFSF14,MET,FAS,CD40,TP53	5
Liver Inflammation/Hepatitis	alcoholic hepatitis	severe alcoholic hepatitis	0.124					ADORA2A,PDE4A,TNFRSF1A,PDE7B,CSF3R	5
Cardiac Dysfunction, Cardiac Enlargement	hypertrophy	hypertrophy of left ventricle	0.129					EPO,ADRB1,CPT1A,CACNA1C,VDR,TPM1,CACNA1D,ADRA1A	8
Liver Inflammation/Hepatitis	acute hepatitis	acute hepatitis	0.13					ADORA2A,IL1R1,PDE4A,TNFRSF1A,PDE7B,CSF1,PDCD1	7
Cardiac Arrythmia	familial arrhythmia	familial arrhythmia	0.133					GPD1L,TMEM43,HEY2,ADRB1,DPP6,CACNA1C,KCNJ5,ANK2,SCN3B,HCN4,CACNA1D,RYR2	12
Cardiac Arteriopathy	coronary artery disease	coronary artery disease	0.137					ADORA2A,SLC12A3,MIA3,CYP2C19,EIF4H,F2R,LRIG1,SMG6,SMAD3,NOS3,TLR2,ESR1,F2,CORO2A,SNX29,PSRC1,CACNA1E,INSR,ADRA2B,AR,APOB,CDCP1,MTHFD1L,ZNF274,CD55,APOA1,SERPINE1,RCSD1,HRH2,NNMT,PDE4A,NPR1,FRMD4A,IL6,APOC3,CA5B,CERS6,LDLR,IL1R1,PDE7B,ITGB3,CACNA1D,KALRN,CDH13,GABRR2,GABRG2,NPC1L1,ADRB1,ADARB2,ABCG1,BORCS8-MEF2B,GABRG1,KLF2,ADORA2B,CAMTA1,RNF220,KDM1A,GABRG3,CACNA1C,SCNN1B,VDR,CTNNBL1,RBFOX1,AADAT…	65
Cardiac Arrythmia, Congenital Heart Anomaly	Romano-Ward syndrome	Romano-Ward syndrome	0.143					CALM1 (includes others),KCNJ5,ANK2,KCNE1	4
Cardiac Arrythmia	Brugada syndrome type 2	Brugada syndrome type 2	0.161					GPD1L	1
Cardiac Arrythmia	Brugada syndrome type 3	Brugada syndrome type 3	0.161					CACNA1C	1
Congenital Heart Anomaly	Frank-Ter Haar syndrome	Frank-Ter Haar syndrome	0.161					SH3PXD2B	1
Congenital Heart Anomaly	Hirschsprung disease, cardiac defects, and autonomic dysfunction	Hirschsprung disease, cardiac defects, and autonomic dysfunction	0.161					ECE1	1
Hepatocellular Carcinoma, Liver Hyperplasia/Hyperproliferation	MET amplification positive hepatocellular carcinoma	MET amplification positive hepatocellular carcinoma	0.161					MET	1
Cardiac Arrythmia, Congenital Heart Anomaly	Timothy syndrome	Timothy syndrome	0.161					CACNA1C	1
Cardiac Inflammation	acute myocarditis	acute myocarditis	0.161					IL1R1	1
Renal Inflammation, Renal Nephritis	acute pyelonephritis	acute pyelonephritis	0.161					TOP2A	1
Liver Inflammation/Hepatitis, Liver Steatosis	nonalcoholic steatohepatitis	advanced stage nonalcoholic steatohepatitis	0.161					LEP	1
Liver Hyperplasia/Hyperproliferation	growth	arrest in growth of liver cancer cells	0.161					HPN	1
Congenital Heart Anomaly	atrial septal defect 4	atrial septal defect 4	0.161					TBX20	1
Cardiac Arteriopathy	autosomal dominant coronary artery disease type 1	autosomal dominant coronary artery disease type 1	0.161					MEF2A	1
Glomerular Injury	focal segmental glomerulosclerosis	autosomal dominant focal segmental glomerulosclerosis	0.161					ACTN4	1
Cardiac Arrythmia	autosomal dominant sick sinus syndrome type 2	autosomal dominant sick sinus syndrome type 2	0.161					HCN4	1
Cardiac Arrythmia	brugada syndrome type 7	brugada syndrome type 7	0.161					SCN3B	1
Congenital Heart Anomaly	cardiospondylocarpofacial syndrome	cardiospondylocarpofacial syndrome	0.161					MAP3K7	1
Cardiac Arrythmia, Tachycardia	catecholaminergic polymorphic ventricular tachycardia type 4	catecholaminergic polymorphic ventricular tachycardia type 4	0.161					CALM1 (includes others)	1
Hepatocellular Carcinoma, Liver Hyperplasia/Hyperproliferation	childhood type hepatocellular carcinoma	childhood type hepatocellular carcinoma	0.161					MET	1
Decreased Levels of Albumin	production	decreased production of albumin	0.161					IL6	1
Hepatocellular Carcinoma, Liver Hyperplasia/Hyperproliferation	development	development of hepatocellular carcinoma	0.161					MET	1
Pulmonary Hypertension	dexfenfluramine-associated primary pulmonary hypertension	dexfenfluramine-associated primary pulmonary hypertension	0.161					BMPR2	1
Congenital Heart Anomaly	dextro-looped transposition of the great arteries type 1	dextro-looped transposition of the great arteries type 1	0.161					MED13L	1
Cardiac Dilation	dilated cardiomyopathy 1x	dilated cardiomyopathy 1x	0.161					FKTN	1
Cardiac Dilation	dilated cardiomyopathy 1y	dilated cardiomyopathy 1y	0.161					TPM1	1
Cardiac Dilation	dilated cardiomyopathy type 1T	dilated cardiomyopathy type 1T	0.161					TMPO	1
Cardiac Dilation	dilated cardiomyopathy type 1U	dilated cardiomyopathy type 1U	0.161					PSEN1	1
Liver Inflammation/Hepatitis	hepatitis B	early stage acute hepatitis B	0.161					PDCD1	1
Cardiac Arrythmia	familial arrhythmogenic right ventricular dysplasia type 2	familial arrhythmogenic right ventricular dysplasia type 2	0.161					RYR2	1
Cardiac Arrythmia	familial arrhythmogenic right ventricular dysplasia type 5	familial arrhythmogenic right ventricular dysplasia type 5	0.161					TMEM43	1
Pulmonary Hypertension	fenfluramine-associated primary pulmonary hypertension	fenfluramine-associated primary pulmonary hypertension	0.161					BMPR2	1
Glomerular Injury	focal segmental glomerulosclerosis 1	focal segmental glomerulosclerosis 1	0.161					ACTN4	1
Glomerular Injury	focal segmental glomerulosclerosis type 6	focal segmental glomerulosclerosis type 6	0.161					MYO1E	1
Glomerular Injury	glomerulopathy with fibronectin deposits type 2	glomerulopathy with fibronectin deposits type 2	0.161					FN1	1
Liver Steatosis	hepatic steatosis	grade 2-3 hepatic steatosis	0.161					SREBF1	1
Hepatocellular Carcinoma, Liver Hyperplasia/Hyperproliferation	hepatitis C virus-related hepatocellular carcinoma	hepatitis C virus-related hepatocellular carcinoma	0.161					ARID2	1
Renal Inflammation, Renal Nephritis	hereditary angiopathy with nephropathy, aneurysms, and muscle cramps	hereditary angiopathy with nephropathy, aneurysms, and muscle cramps	0.161					COL4A1	1
Liver Damage, Liver Inflammation/Hepatitis	chronic hepatitis C	high grade chronic hepatitis C	0.161					CCR7	1
Liver Cirrhosis	hypermanganesemia with dystonia, polycythemia, and cirrhosis	hypermanganesemia with dystonia, polycythemia, and cirrhosis	0.161					SLC30A10	1
Liver Cirrhosis	indian childhood cirrhosis	indian childhood cirrhosis	0.161					UTP4	1
Renal Damage, Renal Tubule Injury	injury	injury of tubulointerstitium	0.161					FABP1	1
Congenital Heart Anomaly	jervell and lange-nielsen syndrome type 2	jervell and lange-nielsen syndrome type 2	0.161					KCNE1	1
Renal Inflammation, Renal Nephritis	karyomegalic interstitial nephritis	karyomegalic interstitial nephritis	0.161					FAN1	1
Cardiac Dysfunction	left ventricular noncompaction type 9	left ventricular noncompaction type 9	0.161					TPM1	1
Liver Hyperplasia/Hyperproliferation	liver metastasis	liver metastasis by cancer stem cells	0.161					PRNP	1
Liver Hyperplasia/Hyperproliferation	liver mucosa associated lymphoid tissue lymphoma	liver mucosa associated lymphoid tissue lymphoma	0.161					MALT1	1
Cardiac Arrythmia, Congenital Heart Anomaly	long QT syndrome type 13	long QT syndrome type 13	0.161					KCNJ5	1
Cardiac Arrythmia, Congenital Heart Anomaly	long QT syndrome type 14	long QT syndrome type 14	0.161					CALM1 (includes others)	1
Cardiac Arrythmia, Congenital Heart Anomaly	long QT syndrome type 15	long QT syndrome type 15	0.161					CALM1 (includes others)	1
Cardiac Arrythmia, Congenital Heart Anomaly	long QT4 syndrome	long QT4 syndrome	0.161					ANK2	1
Congenital Heart Anomaly	mental retardation and distinctive facial features with cardiac defects	mental retardation and distinctive facial features with cardiac defects	0.161					MED13L	1
Nephrosis	nephronophthisis 14	nephronophthisis 14	0.161					ZNF423	1
Nephrosis	nephronophthisis type 19	nephronophthisis type 19	0.161					DCDC2	1
Nephrosis	nephrotic syndrome type 10	nephrotic syndrome type 10	0.161					EMP2	1
Nephrosis	nephrotic syndrome type 7	nephrotic syndrome type 7	0.161					DGKE	1
Liver Fibrosis	opisthorchiasis periductal fibrosis	opisthorchiasis periductal fibrosis	0.161					IL6	1
Cardiac Arrythmia	paroxysmal familial ventricular fibrillation type 2	paroxysmal familial ventricular fibrillation type 2	0.161					DPP6	1
Liver Damage, Liver Inflammation/Hepatitis	chronic hepatitis B	persistent chronic hepatitis B	0.161					CSF1	1
Liver Damage, Liver Inflammation/Hepatitis	chronic hepatitis C	persistent chronic hepatitis C	0.161					CSF1	1
Pulmonary Hypertension	primary pulmonary hypertension 4	primary pulmonary hypertension 4	0.161					KCNK3	1
Pulmonary Hypertension	primary pulmonary hypertension with hereditary hemorrhagic telangiectasia 1	primary pulmonary hypertension with hereditary hemorrhagic telangiectasia 1	0.161					BMPR2	1
Cardiac Proliferation	proliferation	proliferation of ventricular myocytes	0.161					LEP	1
Pulmonary Hypertension	pulmonary venoocclusive disease type 2	pulmonary venoocclusive disease type 2	0.161					EIF2AK4	1
Liver Hyperplasia/Hyperproliferation	liver cancer	recurrent liver cancer	0.161					TP53	1
Cardiac Arrythmia	recurrent metabolic encephalomyopathic crises with rhabdomyolysis, cardiac arrhythmias, and neurodegeneration	recurrent metabolic encephalomyopathic crises with rhabdomyolysis, cardiac arrhythmias, and neurodegeneration	0.161					TANGO2	1
Renal Damage	reperfusion injury	reperfusion injury of kidney	0.161					TLR2	1
Cardiac Damage	reperfusion injury	reperfusion injury of myocardium	0.161					SERPING1	1
Heart Failure	chronic heart failure	severe chronic heart failure	0.161					CXCL12	1
Cardiac Arrythmia	sinoatrial node dysfunction and deafness	sinoatrial node dysfunction and deafness	0.161					CACNA1D	1
Liver Fibrosis	hepatic fibrosis	stage III-IV hepatic fibrosis	0.161					SREBF1	1
Renal Necrosis/Cell Death	survival	survival of mesangial cells	0.161					FAS	1
Cardiac Arrythmia, Congenital Heart Anomaly	susceptibility to acquired long QT syndrome type 5	susceptibility to acquired long QT syndrome type 5	0.161					KCNE1	1
Cardiac Arteriopathy	susceptibility to coronary artery spasm 1	susceptibility to coronary artery spasm 1	0.161					NOS3	1
Liver Failure	transient infantile liver failure	transient infantile liver failure	0.161					TRMU	1
Cardiac Arrythmia	variation in resting heart rate	variation in resting heart rate	0.161					ADRB1	1
Cardiac Arrythmia	long-QT syndrome	long-QT syndrome	0.163					CALM1 (includes others),TMEM43,CIT,CACNA1C,RIMS1,KCNJ5,ANK2,KCNE1,RYR2	9
Cardiac Arrythmia	tachyarrhythmia	tachyarrhythmia	0.164					ADRB1,ADRA2B,ADRA1A	3
Hepatocellular Carcinoma, Liver Hyperplasia/Hyperproliferation	advanced hepatocellular carcinoma	advanced hepatocellular carcinoma	0.173					TOP2A,PDGFRB,CDKN1B,ROS1,MET,AXL,ING1	7
Liver Hyperplasia/Hyperproliferation	liver metastasis	liver metastasis	0.175					RRM2,TOP2A,PDGFRB,RRM1,PRNP,POLE4,PDGFRA,HSP90B1,MTHFR,SERPINE1	10
Cardiac Arteriopathy	variant angina	variant angina	0.176					CACNA1C,NOS3,RCSD1,CACNA1D	4
Cardiac Arrythmia	Brugada syndrome	Brugada syndrome	0.176					GPD1L,HEY2,CACNA1C,ANK2,SCN3B,HCN4	6
Cardiac Enlargement	enlargement	enlargement of cardiomyocytes	0.185					IL11,PRKG1	2
Renal Proliferation	cell proliferation	cell proliferation of kidney cell lines	0.193					PTCH1,FGF19,FBN2,TPP2,CHKA,OXTR,GRN,LARP1,TSC22D3,SCUBE3,DLC1,CDKN1A,RXRA,IQGAP2,TSC1,PTGES,EIF4EBP1,FOXO1,ESR1,ALOX15,NANOG,NTN1,OSBP2,CDCP1,CCNH,CDKN1B,GPR12,ZSCAN18,PTP4A3,DDR2	30
Cardiac Enlargement	hypertrophy	hypertrophy of heart	0.195					EPO,LMCD1,IL11,ADRB1,CPT1A,CACNA1C,CAMK2D,VDR,TPM1,CACNA1D,ADRA1A,MEF2A	12
Cardiac Congestive Cardiac Failure, Heart Failure	congestive heart failure	congestive heart failure	0.2					PDE4A,NPR1,SLC12A3,ADRB1,KCNA7,ADRA2B,IL6,KCNE1,CA5B,KCNK3,AR,EPO,PDE7B,CACNA1C,SCNN1B,KCNJ12,KCNJ5,AOC3,CACNA2D2,CACNA1D,ADRA1A	21
Liver Failure	failure	failure of liver	0.202					TOP2A,ADRB1,CSF3R,SIGMAR1,ADRA2B,IL6,PDCD1,TRMU,ADRA1A	9
Liver Steatosis	nonalcoholic fatty liver disease	nonalcoholic fatty liver disease	0.202					ACSL4,MOGAT2,SREBF1,FABP4,LATS2,CPT1A,HSD17B13,DGAT1,LEP	9
Liver Inflammation/Hepatitis, Liver Steatosis	steatohepatitis	steatohepatitis	0.202					ADORA2A,APOB,PDE4A,TNFRSF1A,PDE7B,XBP1,GBP2,LEP,IL6	9
Liver Cholestasis	cholestasis	cholestasis	0.205					AKR1D1,SREBF1,ABCG1,CACNA1B,SLC10A2,IL6,SLC12A2,HSD3B7,GK,TAP2,APOA1,ADH6,CACNA2D2,HNF1B,SLC25A13,PAH	16
Cardiac Dysfunction, Heart Failure	diastolic heart failure	diastolic heart failure	0.208					AR,NPR1,ADRB1	3
Liver Fibrosis, Liver Proliferation	proliferation	proliferation of hepatic stellate cells	0.208					CXCL12,COL1A1,F2	3
Cardiac Arrythmia	Brugada syndrome type 1	Brugada syndrome type 1	0.208					GPD1L,CACNA1C,ANK2,SCN3B,HCN4	5
Cardiac Infarction	acute myocardial infarction	acute myocardial infarction	0.216					CXCL12,ADORA2A,C3,NPC1L1,ADRB1,CSF3R,PPP3CB,INSR,IL6,PPP3CC,ADORA2B,AR,EPO,F2R,IL1R1,CACNA1C,APOA1,ITGB3,SERPINE1,NOS3,TLR2,F2	22
Cardiac Dilation	dilated cardiomyopathy	dilated cardiomyopathy	0.223					APLNR,TMEM43,DPP6,CAMK2D,IL6,JPH2,CDS2,GPD1L,SLC25A11,FN1,PDLIM3,IL1R1,FKTN,DMTF1,TMPO,TPM1,TXNRD2,CACNA1D,ADRA1A,CIITA,PSEN1,FRRS1,TOP2A,MYL2,ADRB1,ANK2,GBP2,ZNF7,HCN4,TIMP2,AR,CDK5R1,NEBL,TIMP3,CACNA1C,RYR2,ATXN1	37
Cardiac Dilation	primary dilated cardiomyopthy	primary dilated cardiomyopthy	0.23					GPD1L,PDLIM3,TMEM43,MYL2,NEBL,DPP6,ANK2,TPM1,TXNRD2,JPH2,HCN4,RYR2	12
Cardiac Infarction	myocardial infarction	myocardial infarction	0.236					CXCL12,ADORA2A,C3,CSF3R,CYP2C19,IL6,PPP3CC,F2R,IL1R1,ITGB3,NOS3,TLR2,ESR1,ADRA1A,F2,NPY,NPC1L1,ADRB1,LTA,PPP3CB,INSR,ADRA2B,OLR1,ADORA2B,AR,EPO,CACNA1C,CD55,APOA1,VDR,SERPINE1	31
Liver Cirrhosis	cirrhosis	Cirrhosis	0.237					CCR7,IL12A,CCL8,TNFRSF1A,CSF3R,CYP3A4,COL1A1,F2R,C5AR1,IL7R,GHR,CD86,ESR1,F2,HLA-DPB1,TOP2A,INSR,ADRA2B,AR,APOB,TP73,APOA1,CACNA2D2,PDE4A,WNT5A,PTCH1,CCR1,C1orf61,CACNA1B,IL6,NOTCH2,GLG1,FN1,LDLR,WNT2,PDE7B,NT5E,ADRA1A,PAH,PDGFRB,COCH,UTP4,ARHGAP17,GABRR2,GABRG2,ADRB1,GBP2,B2M,F5,SLC30A10,GABRG1,KRT18,TLR3,GABRG3,CSF1,RUNX3,XBP1,LEP	58
Liver Proliferation	proliferation	proliferation of liver cells	0.239					CXCL12,DLC1,MET,COL1A1,F2	5
Liver Steatosis	hepatic steatosis	hepatic steatosis	0.247					ADORA2A,MOGAT2,SREBF1,PDE4A,FABP4,TNFRSF1A,CPT1A,DGAT1,GBP2,IL6,ACSL4,AR,APOB,LATS2,PDE7B,HSD17B13,XBP1,LEP,ESR1	19
Liver Damage	hepatotoxicity	hepatotoxicity	0.248					DHFR,PARD3B,MTHFR,SLC13A1	4
Renal Inflammation, Renal Nephritis	diffuse proliferative lupus nephritis	diffuse proliferative lupus nephritis	0.249					CD40,ACTN4	2
Renal Inflammation, Renal Nephritis	idiopathic membranous nephropathy	idiopathic membranous nephropathy	0.249					PPP3CB,PPP3CC	2
Liver Hyperplasia/Hyperproliferation	primary liver cancer	primary liver cancer	0.249					HPSE,C1orf61	2
Pulmonary Hypertension	primary pulmonary hypertension 1	primary pulmonary hypertension 1	0.249					KCNK3,BMPR2	2
Congenital Heart Anomaly	single ventricle defect	single ventricle defect	0.249					ADRB1,ADRA1A	2
Liver Inflammation/Hepatitis, Liver Steatosis	nonalcoholic steatohepatitis	nonalcoholic steatohepatitis	0.258					ADORA2A,APOB,PDE4A,TNFRSF1A,PDE7B,XBP1,GBP2,LEP	8
Liver Hyperplasia/Hyperproliferation	hepatosplenic T-cell lymphoma	hepatosplenic T-cell lymphoma	0.258					RRM2,TOP2A,RRM1,DHFR,POLE4,FPGS	6
Liver Cirrhosis	liver cirrhosis	primary liver cirrhosis	0.261					CCR7,HLA-DPB1,PDGFRB,IL12A,CCL8,WNT5A,PTCH1,B2M,NOTCH2,GLG1,F2R,APOB,FN1,LDLR,TLR3,WNT2,C5AR1,IL7R,CD86	19
Congenital Heart Anomaly	congenital heart disease	congenital heart disease	0.285					MAP3K7,MED13L,CALM1 (includes others),C3,PTCH1,ADRB1,SH3PXD2B,ANK2,ADRA2B,IL6,KCNE1,HAND1,B4GALT7,TBX20,SLC6A3,DLC1,ECE1,CACNA1C,KCNJ5,NOS3,ADRA1A,F2,RNF20,HTR2A	24
Congenital Heart Anomaly	Shprintzen syndrome	Shprintzen syndrome	0.286					SLC6A3,ADRA2B,ADRA1A,HTR2A	4
Cardiac Arrythmia, Congenital Heart Anomaly	Andersen syndrome	Andersen syndrome	0.295					KCNJ5	1
Renal Proliferation	growth	arrest in growth of kidney cell lines	0.295					OSBP2	1
Renal Inflammation, Renal Nephritis	Alport syndrome	autosomal dominant Alport syndrome	0.295					COL4A4	1
Renal Inflammation, Renal Nephritis	Alport syndrome	autosomal recessive Alport syndrome	0.295					COL4A4	1
Cardiac Arrythmia	brugada syndrome type 8	brugada syndrome type 8	0.295					HCN4	1
Cardiac Necrosis/Cell Death	cell viability	cell viability of cardiomyocytes	0.295					EPO	1
Liver Cirrhosis	cryptogenic cirrhosis	cryptogenic cirrhosis	0.295					KRT18	1
Decreased Levels of Albumin	secretion	decreased secretion of albumin	0.295					IL6	1
Cardiac Arrythmia, Congenital Heart Anomaly	digenic long QT syndrome 2/5	digenic long QT syndrome 2/5	0.295					KCNE1	1
Cardiac Dilation	doxorubicin induced cardiomyopathy	doxorubicin induced cardiomyopathy	0.295					TOP2A	1
Cardiac Arrythmia	familial arrhythmogenic right ventricular dysplasia type 1	familial arrhythmogenic right ventricular dysplasia type 1	0.295					RYR2	1
Cardiac Arrythmia, Tachycardia	familial ventricular tachycardia	familial ventricular tachycardia	0.295					RYR2	1
Liver Inflammation/Hepatitis	granulomatous hepatitis	granulomatous hepatitis	0.295					CCL8	1
Liver Inflammation/Hepatitis	hepatitis subtype infantile hepatitis syndrome	hepatitis subtype infantile hepatitis syndrome	0.295					IL6	1
Liver Inflammation/Hepatitis	infantile cholestatic hepatitis syndrome	infantile cholestatic hepatitis syndrome	0.295					IL6	1
Renal Inflammation, Renal Nephritis	infantile nephropathic cystinosis	infantile nephropathic cystinosis	0.295					MTHFR	1
Cardiac Arteriopathy	ischemic coronary artery disease	ischemic coronary artery disease	0.295					TLR2	1
Cardiac Dysfunction	left ventricular diastolic dysfunction	left ventricular diastolic dysfunction	0.295					ADRB1	1
Liver Damage, Liver Inflammation/Hepatitis	chronic hepatitis C	low grade chronic hepatitis C	0.295					CCR7	1
Hepatocellular Carcinoma, Liver Hyperplasia/Hyperproliferation	hepatocellular carcinoma	malignant hepatocellular carcinoma	0.295					SREBF1	1
Liver Inflammation/Hepatitis	alcoholic hepatitis	mild alcoholic hepatitis	0.295					TNFRSF1A	1
Hepatocellular Carcinoma, Liver Hyperplasia/Hyperproliferation	hepatocellular carcinoma	poorly differentiated hepatocellular carcinoma	0.295					ING1	1
Liver Proliferation	proliferation	proliferation of oval cells	0.295					CXCL12	1
Cardiac Pulmonary Embolism	pulmonary embolism	recurrent pulmonary embolism	0.295					F2	1
Liver Regeneration	regeneration	regeneration of liver cells	0.295					IL6	1
Cardiac Arrythmia	short-QT syndrome 4	short-QT syndrome 4	0.295					CACNA1C	1
Bradycardia, Cardiac Arrythmia	sinus bradycardia	sinus bradycardia	0.295					HCN4	1
Cardiac Arrythmia	sinus-node dysfunction	sinus-node dysfunction	0.295					HCN4	1
Liver Cirrhosis	susceptibility to noncryptogenic cirrhosis	susceptibility to noncryptogenic cirrhosis	0.295					KRT18	1
Heart Failure	heart failure	symptomatic stage hypertensive heart failure	0.295					ADRB1	1
Heart Failure	heart failure	symptomatic stage ischemic heart failure	0.295					ADRB1	1
Heart Failure	cardiomyopathic heart failure	symptomatic stage stable cardiomyopathic heart failure	0.295					ADRB1	1
Renal Inflammation, Renal Nephritis	thin basement membrane disease	thin basement membrane disease	0.295					COL4A4	1
Cardiac Arrythmia	paroxysmal familial ventricular fibrillation	paroxysmal familial ventricular fibrillation	0.301					DPP6,CACNA1C,RYR2	3
Liver Proliferation	proliferation	proliferation of hepatocytes	0.301					CXCL12,DLC1,MET	3
Kidney Failure	acute renal failure	acute renal failure	0.308					TOP2A,FABP1,NPR1,ADRB1,PPP3CB,ADRA2B,PPP3CC,ADRA1A	8
Renal Inflammation, Renal Nephritis	collagen type IV inherited nephropathy	collagen type IV inherited nephropathy	0.313					COL4A1,COL4A4	2
Liver Cirrhosis	compensated cirrhosis	compensated cirrhosis	0.313					APOA1,CYP3A4	2
Liver Cirrhosis	primary biliary cirrhosis	early stage primary biliary cirrhosis	0.313					APOB,LDLR	2
Cardiac Infarction	nonfatal myocardial infarction	nonfatal myocardial infarction	0.313					ITGB3,CYP2C19	2
Liver Cirrhosis	primary biliary cirrhosis	primary biliary cirrhosis	0.337					CCR7,HLA-DPB1,PDGFRB,IL12A,CCL8,WNT5A,PTCH1,B2M,NOTCH2,GLG1,F2R,APOB,LDLR,TLR3,WNT2,C5AR1,IL7R,CD86	18
Kidney Failure	failure	failure of kidney	0.339					ADORA2A,PDE4A,NPR1,C3,CHRNA10,PPP3CC,F2R,CHRND,GHR,PDE7B,CDKN1A,CD86,CACNA1D,ADRA1A,F2,CHRNA5,TOP2A,GABRG2,ADRB1,PPP3CB,ADRA2B,CASR,GABRG1,AR,EPO,FABP1,APOB,SLC6A3,CHRNB4,GABRG3,CACNA1C,VDR,SERPINE1,CHRNA4	34
Heart Failure	cardiac decompensation	cardiac decompensation	0.348					NPR1,ADRB1,ADRA1A	3
Cardiac Dilation	idiopathic dilated cardiomyopathy	idiopathic dilated cardiomyopathy	0.348					SLC25A11,APLNR,CDK5R1,DMTF1,IL6,CDS2	6
Liver Inflammation/Hepatitis	alcoholic hepatitis	alcoholic hepatitis	0.355					ADORA2A,IL1R1,PDE4A,TNFRSF1A,PDE7B,CSF3R,IL6	7
Kidney Failure, Liver Failure	hepatorenal syndrome	hepatorenal syndrome	0.365					TOP2A,ADRB1,ADRA2B,ADRA1A	4
Cardiac Enlargement	hypertrophy	hypertrophy of cardiac muscle	0.365					LMCD1,IL11,CAMK2D,MEF2A	4
Heart Failure	cardiorenal syndrome	cardiorenal syndrome	0.374					AR,NPR1,SLC12A3,AOC3,CA5B	5
Glomerular Injury	familial focal segmental glomerulosclerosisrosis	familial focal segmental glomerulosclerosisrosis	0.376					MYO1E,ACTN4	2
Hepatocellular Carcinoma, Liver Hyperplasia/Hyperproliferation	hepatocellular carcinoma	hepatocellular carcinoma	0.385					LPAR1,PLCB2,DNASE1L3,CDK14,EFNA5,CNDP1,CLEC4G,PCF11,FCN2,CSE1L,ARPC5,GHR,PVR,CCDC122,TOP2A,YWHAG,HSP90B1,SAMD9L,LMCD1,RRM1,APOB,ROS1,ZNF841,TP73,CRHBP,AKR1C1/AKR1C2,NNMT,CXCL12,KLF13,GNAO1,HPSE,RNF213,TP53,AXIN2,GCH1,FN1,HUWE1,DLC1,RNMT,DCN,CENPU,F8,SCIMP,PDGFRB,SREBF1,RAD50,POLE4,RACK1,NASP,PAK1,TXNRD1,KCTD2,GBP2,IGF2R,HAL,NEDD4,CSF1,TFCP2,CEACAM5,AXL,DDR2,BAZ1B,MGRN1,PTEN,C3,MT1H,TMEM55A,HIST1H…	131
Cardiac Dysfunction	left ventricular dysfunction	left ventricular dysfunction	0.387					EPO,ADRB1,CSF3R,CPT1A,CACNA1C,VDR,TPM1,CACNA1D,ADRA1A	9
Pulmonary Hypertension	pulmonary hypertensive arterial disease	pulmonary hypertensive arterial disease	0.387					KCNK3,BMPR1A,BMPR2,PDGFRB,ITSN1,PDGFRA,EIF2AK4,SERPINE1,DDR2	9
Bradycardia, Cardiac Arrythmia	bradycardia	bradycardia	0.404					ADRB1,ADRA2B,HCN4,ADRA1A	4
Increased Levels of Alkaline Phosphatase	activation	increased activation of alkaline phosphatase	0.408					AGER,BMP4,KLF10,IL6,WNT3A	5
Decreased Levels of Albumin	synthesis	decreased synthesis of albumin	0.408					IL6	1
Hepatocellular Carcinoma, Liver Hyperplasia/Hyperproliferation	hepatocellular carcinoma	grade 2 progressive hepatocellular carcinoma	0.408					TOP2A	1
Hepatocellular Carcinoma, Liver Hyperplasia/Hyperproliferation	hepatocellular carcinoma	grade 3 progressive hepatocellular carcinoma	0.408					TOP2A	1
Congenital Heart Anomaly	hypoplastic left heart syndrome	hypoplastic left heart syndrome	0.408					HAND1	1
Increased Levels of LDH	activation	increased activation of LDH	0.408					CFD	1
Decreased Levels of Potassium	uptake	increased uptake of K+	0.408					FAS	1
Cardiac Dysfunction	left ventricular systolic dysfunction	left ventricular systolic dysfunction	0.408					CSF3R	1
Liver Fibrosis	migration	migration of hepatic stellate cells	0.408					CCR7	1
Congenital Heart Anomaly	multiple joint dislocations, short stature, craniofacial dysmorphism, and congenital heart defects	multiple joint dislocations, short stature, craniofacial dysmorphism, and congenital heart defects	0.408					B4GALT7	1
Cardiac Dilation	nonischemic dilated cardiomyopathy	nonischemic dilated cardiomyopathy	0.408					AR	1
Liver Damage, Liver Inflammation/Hepatitis	susceptibility to hepatitis C virus	susceptibility to hepatitis C virus	0.408					KRT18	1
Kidney Failure	chronic renal failure	chronic renal failure	0.428					ADORA2A,PDE4A,C3,GABRG2,PPP3CB,CASR,PPP3CC,GABRG1,AR,EPO,F2R,APOB,SLC6A3,GABRG3,GHR,PDE7B,CDKN1A,CACNA1C,VDR,SERPINE1,CD86,CACNA1D,F2	23
Cardiac Arrythmia	arrhythmia	arrhythmia	0.431					S1PR2,ADORA2A,DMPK,CALM1 (includes others),TMEM43,KCNA7,DPP6,IL6,KCNK3,GPD1L,KCNJ12,TPM1,SCN3B,CACNA1D,ADRA1A,F2,MAOA,HEY2,NPC1L1,ADRB1,RIMS1,ANK2,ADRA2B,KCNE1,HCN4,KHDRBS1,ADORA2B,AR,CIT,CACNA1C,KCNJ5,SERPINE1,CACNA2D2,TANGO2,RYR2,ATXN1	36
Liver Failure	acute liver failure	acute liver failure	0.437					PDCD1,TRMU	2
Cardiac Arrythmia	familial arrhythmogenic cardiomyopathy	familial arrhythmogenic cardiomyopathy	0.437					TMEM43,RYR2	2
Renal Hydronephrosis	hydronephrosis	hydronephrosis	0.441					ALCAM,LEP,TGFBR1,ITGA9,ADRA1A,XCR1	6
Liver Cholestasis	intrahepatic cholestasis	intrahepatic cholestasis	0.454					AKR1D1,HSD3B7,GK,SREBF1,TAP2,ABCG1,ADH6,SLC10A2,SLC25A13,SLC12A2,PAH	11
Liver Damage, Liver Inflammation/Hepatitis	infection	infection by Hepatitis C virus	0.466					CCR7,MTR,RACK1,CHRNA10,CYB5B,NPC1L1,CSF3R,IFNLR1,PPP3CB,INSR,CYP3A4,IL6,PPP3CC,FCN2,KRT18,GCSH,EPO,SLC6A3,CSF1,LEP	20
Heart Failure	chronic heart failure	chronic heart failure	0.467					CXCL12,NPR1,GHR,ADRB1,ADRA2B,CA5B,ADRA1A	7
Renal Necrosis/Cell Death	cell death	cell death of kidney cell lines	0.476					GRB10,ATG5,TNFRSF1A,FGF19,CABLES1,TRPM2,ATP2B2,AMER1,BCL10,EMP2,F2,TRPM7,MELK,CASR,EPHB2,BECN1,AR,TRIM39,MOAP1,PRNP,DDN,TP73,PPP1R15A,FAS,UNC13B,SARM1,PTCH1,MLKL,ALDH3B1,PPID,CASP2,FOXO1,APOL1,PSEN1,PLCB1,PAK2,TCF3,TRPS1,LGALS12,SGPL1,MEFV,TRIM27,RASSF4,PYCARD,PTGIS,TNFRSF10A,SIRT3,HSPA5,SLC47A1,F3,RGS4,GLS	52
Liver Cholestasis	progressive familial intrahepatic cholestasis type 1	progressive familial intrahepatic cholestasis type 1	0.48					AKR1D1,GK,SREBF1,TAP2,ABCG1,ADH6,SLC10A2,SLC25A13,SLC12A2,PAH	10
Cardiac Arrythmia	arrhythmogenic right ventricular dysplasia	arrhythmogenic right ventricular dysplasia	0.48					TMEM43,ANK2,HCN4,RYR2	4
Congenital Heart Anomaly	heart septal defect	heart septal defect	0.48					TBX20,ADRB1,ADRA2B,ADRA1A	4
Renal Necrosis/Cell Death	cell death	cell death of kidney cells	0.484					GRB10,ATG5,TNFRSF1A,FGF19,CABLES1,TRPM2,ATP2B2,AMER1,BCL10,EMP2,F2,TRPM7,MELK,CASR,EPHB2,BECN1,AR,TRIM39,MOAP1,PRNP,CDKN1B,DDN,TP73,PPP1R15A,FAS,UNC13B,SARM1,PTCH1,MLKL,ALDH3B1,PPID,CASP2,FOXO1,APOL1,PSEN1,PLCB1,PAK2,TCF3,TRPS1,LGALS12,SGPL1,MEFV,TRIM27,RASSF4,PYCARD,PTGIS,TNFRSF10A,SIRT3,HSPA5,SLC47A1,F3,RGS4,GLS	53
Liver Hyperplasia/Hyperproliferation	undifferentiated (embryonal) sarcoma	undifferentiated (embryonal) sarcoma	0.486					TOP2A,PDGFRB,PDGFRA	3
Hepatocellular Carcinoma, Liver Hyperplasia/Hyperproliferation	hepatocellular carcinoma	unresectable hepatocellular carcinoma	0.486					TOP2A,PDGFRB,HSP90B1	3
Liver Cirrhosis	cirrhosis	advanced stage cirrhosis	0.503					F5	1
Glomerular Injury, Renal Necrosis/Cell Death	apoptosis	apoptosis of mesangial cells	0.503					CDKN1B	1
Liver Inflammation/Hepatitis	hepatitis A	hepatitis A	0.503					CSF1	1
Cardiac Enlargement	hypertrophy	hypertrophy of cardiomyocytes	0.503					IL11	1
Liver Hyperplasia/Hyperproliferation	liver metastasis	inoperable liver metastasis	0.503					TOP2A	1
Kidney Failure	ischemic acute renal failure	ischemic acute renal failure	0.503					FABP1	1
Cardiac Arrythmia, Congenital Heart Anomaly	long QT syndrome 1	long QT syndrome 1	0.503					CALM1 (includes others)	1
Hepatocellular Peroxisome Proliferation	quantity	quantity of peroxisomes	0.503					PEX2	1
Cardiac Arrythmia, Tachycardia	sustained ventricular tachycardia	sustained ventricular tachycardia	0.503					ADRB1	1
Cardiac Arrythmia	atrial fibrillation	symptomatic stage atrial fibrillation	0.503					ADRB1	1
Cardiac Arrythmia, Tachycardia	torsades de pointes	torsades de pointes	0.503					ANK2	1
Cardiac Arrythmia	supraventricular arrhythmia	supraventricular arrhythmia	0.513					S1PR2,ADORA2A,NPC1L1,ADRB1,KCNA7,ADRA2B,IL6,KCNE1,HCN4,KHDRBS1,ADORA2B,KCNK3,AR,CACNA1C,KCNJ12,KCNJ5,SERPINE1,CACNA2D2,SCN3B,CACNA1D,ATXN1,ADRA1A,F2,MAOA	24
Congenital Heart Anomaly	familial congenital heart disease	familial congenital heart disease	0.525					B4GALT7,MED13L,TBX20,SLC6A3,ECE1,SH3PXD2B,ADRA2B,KCNE1,ADRA1A,HTR2A	10
Renal Inflammation, Renal Nephritis	membranous glomerulonephritis	membranous glomerulonephritis	0.529					PPP3CB,ACTN4,PPP3CC	3
Congenital Heart Anomaly	ventricular septal defect	ventricular septal defect	0.529					TBX20,ADRB1,ADRA1A	3
Hepatocellular Carcinoma, Liver Hyperplasia/Hyperproliferation	hepatocellular carcinoma	inoperable hepatocellular carcinoma	0.547					PDGFRB,MET	2
Cardiac Arrythmia	paroxysmal familial ventricular fibrillation type 1	paroxysmal familial ventricular fibrillation type 1	0.547					CACNA1C,RYR2	2
Cardiac Arrythmia	atrial flutter	atrial flutter	0.548					ADRB1,CACNA1C,KCNJ12,ADRA2B,CACNA1D,ADRA1A,F2	7
Heart Failure	cardiorespiratory arrest	cardiorespiratory arrest	0.553					GABRG2,GABRG3,ADRA2B,GABRG1	4
Kidney Failure	chronic kidney disease	end-stage chronic kidney disease	0.57					GABRG2,GABRG3,GABRG1	3
Kidney Failure	renal failure	end-stage renal failure	0.57					GABRG2,GABRG3,GABRG1	3
Nephrosis	minimal change nephrotic syndrome	minimal change nephrotic syndrome	0.57					PPP3CB,ACTN4,PPP3CC	3
Liver Hyperplasia/Hyperproliferation	liver metastasis	progressive liver metastasis	0.57					TOP2A,PDGFRB,PDGFRA	3
Cardiac Dysfunction	systolic dysfunction	systolic dysfunction	0.57					CSF3R,CACNA1C,CACNA1D	3
Hepatocellular Carcinoma, Liver Hyperplasia/Hyperproliferation	hepatitis B virus-related hepatocellular carcinoma	hepatitis B virus-related hepatocellular carcinoma	0.583					ARID2	1
Cardiac Arrythmia	idiopathic ventricular fibrillation	idiopathic ventricular fibrillation	0.583					DPP6	1
Cardiac Infarction	non-Q wave myocardial infarction	non-Q wave myocardial infarction	0.583					F2	1
Hepatocellular Carcinoma, Liver Hyperplasia/Hyperproliferation	hepatocellular carcinoma	primary hepatocellular carcinoma	0.583					C1orf61	1
Liver Damage, Liver Inflammation/Hepatitis	acute hepatitis C	acute hepatitis C	0.65					CSF1	1
Cardiac Arrythmia, Congenital Heart Anomaly	long QT syndrome 2	long QT syndrome 2	0.65					ANK2	1
Renal Damage	nephrotoxicity	nephrotoxicity	0.65					ERCC1	1
Liver Cholestasis	progressive familial intrahepatic cholestasis type 2	progressive familial intrahepatic cholestasis type 2	0.65					SLC10A2	1
Renal Inflammation, Renal Nephritis	nephritis	Nephritis	1					TOP2A,ADORA2A,COL4A1,PDE4A,C3,TNFRSF1A,PPP3CB,COL4A4,MTHFR,CD40,IL6,PPP3CC,TP53,AR,DHFR,PDE7B,VDR,ACTN4,FAN1,CD86	20
Renal Necrosis/Cell Death	apoptosis	apoptosis of kidney cell lines	1					UNC13B,GRB10,SARM1,PTCH1,TNFRSF1A,FGF19,CABLES1,ATP2B2,BCL10,PPID,CASP2,FOXO1,F2,PAK2,TCF3,TRPS1,LGALS12,SGPL1,MEFV,MELK,TRIM27,CASR,RASSF4,PYCARD,PTGIS,TRIM39,TNFRSF10A,HSPA5,DDN,TP73,PPP1R15A,F3,FAS,RGS4,GLS	35
Cardiac Arrythmia	atrial fibrillation	atrial fibrillation	1					S1PR2,NPC1L1,ADRB1,KCNA7,ADRA2B,IL6,KCNE1,KHDRBS1,KCNK3,AR,CACNA1C,KCNJ12,KCNJ5,SERPINE1,CACNA2D2,SCN3B,CACNA1D,ATXN1,ADRA1A,F2,MAOA	21
Cardiac Stenosis	calcific aortic valve stenosis	calcific aortic valve stenosis	1					TIMP2	1
Cardiac Arrythmia	cardiac fibrillation	cardiac fibrillation	1					S1PR2,NPC1L1,ADRB1,KCNA7,DPP6,ADRA2B,IL6,KCNE1,KHDRBS1,KCNK3,AR,CACNA1C,KCNJ12,KCNJ5,SERPINE1,CACNA2D2,SCN3B,CACNA1D,RYR2,ATXN1,ADRA1A,F2,MAOA	23
Liver Damage, Liver Inflammation/Hepatitis	chronic hepatitis	chronic hepatitis	1					CCR7,CHRNA10,CSF3R,IFNLR1,CYP3A4,IL6,PPP3CC,FCN2,MTR,GABRR2,RACK1,CYB5B,GABRG2,CSF2RB,NPC1L1,PPP3CB,INSR,PDCD1,GABRG1,KRT18,GCSH,EPO,SLC6A3,GABRG3,CSF1,TP73,LEP	27
Liver Damage, Liver Inflammation/Hepatitis	chronic hepatitis C	chronic hepatitis C	1					CCR7,EPO,MTR,CHRNA10,CSF1,IFNLR1,PPP3CB,INSR,LEP,IL6,PPP3CC	11
Liver Cirrhosis	cirrhosis	cirrhosis of liver	1					CCR7,IL12A,CCL8,WNT5A,PTCH1,C1orf61,CYP3A4,COL1A1,IL6,NOTCH2,GLG1,F2R,FN1,LDLR,WNT2,C5AR1,IL7R,NT5E,CD86,ADRA1A,PAH,HLA-DPB1,PDGFRB,COCH,ARHGAP17,ADRB1,GBP2,B2M,SLC30A10,KRT18,APOB,TLR3,RUNX3,XBP1,TP73,APOA1,LEP	37
Kidney Failure	end stage renal disease	end stage renal disease	1					ADORA2A,PDE4A,C3,GABRG2,PPP3CB,CASR,PPP3CC,GABRG1,AR,EPO,F2R,SLC6A3,GABRG3,GHR,PDE7B,VDR,CD86,F2	18
Cardiac Dilation	familial dilated cardiomyopathy	familial dilated cardiomyopathy	1					FKTN,TMPO,TPM1,PSEN1	4
Liver Fibrosis	fibrosis	fibrosis of liver	1					SREBF1,IL6	2
Renal Inflammation, Renal Nephritis	glomerulonephritis	glomerulonephritis	1					ADORA2A,PDE4A,C3,TNFRSF1A,PPP3CB,COL4A4,CD40,PPP3CC,TP53,AR,PDE7B,VDR,ACTN4,CD86	14
Liver Inflammation/Hepatitis	infection	infection by hepatitis B virus	1					C3,CSF2RB,CSF1,CSF3R,TP73,RXRA,CYP3A4,IL6,PDCD1	9
Liver Inflammation/Hepatitis	inflammation	inflammation of liver	1					CCR7,ADORA2A,CCL8,PDE4A,C3,CHRNA10,TNFRSF1A,CSF3R,IFNLR1,CYP3A4,IL6,PPP3CC,FCN2,IL1R1,PDE7B,RXRA,MTR,GABRR2,RACK1,CYB5B,GABRG2,CSF2RB,NPC1L1,PPP3CB,INSR,GBP2,PDCD1,GABRG1,KRT18,GCSH,EPO,APOB,SLC6A3,GABRG3,CSF1,XBP1,TP73,LEP	38
Liver Damage	injury	injury of liver	1					CCR7,CHRNA10,CSF3R,IFNLR1,CYP3A4,IL6,PPP3CC,FCN2,MTR,GABRR2,RACK1,CYB5B,GABRG2,CSF2RB,NPC1L1,PPP3CB,INSR,PDCD1,GABRG1,KRT18,GCSH,EPO,HLA-A,SLC6A3,GABRG3,CSF1,TP73,LEP	28
Renal Inflammation, Renal Nephritis	lupus nephritis	lupus nephritis	1					C3,TNFRSF1A,PPP3CB,CD40,ACTN4,PPP3CC,CD86	7
Nephrosis	nephrosis	nephrosis	1					ADORA2A,PDE4A,SLC12A3,PDE7B,PPP3CB,ZNF423,EMP2,DGKE,DCDC2,ACTN4,PPP3CC,CA5B	12
Renal Inflammation, Renal Nephritis	proliferative nephritis	proliferative nephritis	1					C3,VDR,CD40,ACTN4,TP53	5
Cardiac Pulmonary Embolism	pulmonary embolism	pulmonary embolism	1					GGCX,F5,F2	3
Cardiac Stenosis	stenosis	stenosis of aortic valve	1					KLF15,GABRG2,GABRG3,NOS3,GABRG1,TIMP2	6
Liver Inflammation/Hepatitis	viral hepatitis	viral hepatitis	1					CCR7,C3,CHRNA10,CSF3R,IFNLR1,CYP3A4,IL6,PPP3CC,FCN2,RXRA,MTR,RACK1,CYB5B,CSF2RB,NPC1L1,PPP3CB,INSR,PDCD1,KRT18,GCSH,EPO,SLC6A3,CSF1,TP73,LEP	25
Regulator Effects
Networks
ID	Analysis	Molecules in Network	Score	Focus Molecules	Top Diseases and Functions
1	hsa-miR-376a-2-5p	CALCOCO2,CDRT1,CDX1,CDX2,CPEB2,DICER1,DKK4,FAM109B,FBXL14,FHDC1,FOXP1,GEMIN4,GEMIN6,HEPH,HOXB2,HOXB3,HOXB4,INPP5B,MET,NANOG,OCRL,PILRB,PLXNB1,RAPGEF5,RFTN1,RIPPLY3,SEMA4D,SFRP4,SMNDC1,SNRPD3,SOX2,SOX5,UBE2I,UHRF2,ZNF131	27	35	Carbohydrate Metabolism, Lipid Metabolism, Small Molecule Biochemistry
2	hsa-miR-376a-2-5p	AEN,AMOTL2,ASXL1,AURK,BTG2,CDC14B,CMBL,DLGAP1,DMTF1,ETHE1,FAM196A,FKBP3,GAL3ST4,GLTSCR2,HIPK1,KCNG1,LIMK2,ME2,NDUFA4L2,NPRL3,PDE2A,PEX2,PGM3,PHLDA3,PRKAB2,PSTPIP2,RBM34,SCN3B,STOM,TCEA3,TIGAR,TMEM97,TP53,TRIM6,VWCE	25	34	Organismal Injury and Abnormalities, Cell Cycle, Cellular Development
3	hsa-miR-376a-2-5p	26s Proteasome,ADARB2,AKR1C1/AKR1C2,ATP6V0D2,CASR,CYP2C19,CYP3A4,DSCAM,EFHD1,FOXA1,FOXA3,GNAO1,HEXA,HNF1B,MCM10,MICA,NKX2-1,NT5E,PAM,PI4KB,PRDM15,PRKD2,PTPN3,RAB5C,RNF19A,RXRA,SFTPB,SLC10A2,SP100,SPHK2,SSH1,THBD,TMEM8B,TPO,VDR	25	34	Lipid Metabolism, Small Molecule Biochemistry, Vitamin and Mineral Metabolism
4	hsa-miR-376a-2-5p	ANKHD1/ANKHD1-EIF4EBP3,BCKDK,CCNB1,CEP63,CRTC1,CSE1L,DISC1,EGLN,EPN2,FAM57A,FEM1C,HECTD1,IKBIP,KIF1B,KIF5C,LZTFL1,MAP1A,MAP3K2,MPI,MSH2,MSH3,NCKIPSD,NDE1,NUDT13,PAK4,PPFIA4,PPP1R3E,RAB11FIP5,RNF165,RNF219,SHROOM2,SLC27A1,YWHAG,ZBTB25,ZRANB1	25	34	Cell Death and Survival, Nervous System Development and Function, Neurological Disease
5	hsa-miR-376a-2-5p	AP4B1,CAMK2D,CAPNS1,CCDC155,CORO1A,DDA1,EIF5,FBXO41,G0S2,HIVEP3,IL1RL2,Ikb,KCNJ4,KYNU,LDB2,LRCH3,LUC7L3,MICU1,MLKL,MRM3,MYLK3,MYO1E,NFkB (complex),NOP14,NQO2,NUP62,OTUB2,PPP2R5E,PPP4R3A,RIPK4,RTF1,RYR2,TNFAIP8,UTP4,VMP1	23	33	Cell Morphology, Cellular Assembly and Organization, Organ Morphology
6	hsa-miR-376a-2-5p	ARHGAP1,ARPC5L,C1QTNF6,CCPG1,CENPU,COBL,DDX21,ENY2,ESR1,FAM186A,FAM64A,FLCN,FNIP1,GPAM,HSPA13,KCNK6,KRT13,MIER1,MUC20,Mta,PCP4,PHF19,RBFOX2,RRAGC,SHANK2,SHANK3,SHROOM1,SLC25A36,SLC2A4,SSR4P1,TSKU,UBALD1,XK,YPEL1,glutathione peroxidase	23	33	Connective Tissue Development and Function, Organ Morphology, Organismal Development
7	hsa-miR-376a-2-5p	AKT2,ATP10D,CALB2,CALD1,CD5,CNNM1,COL4A1,CSF2RB,CXXC4,Ck2,DPP6,FGF12,FGF5,GREB1,IGDCC3,IL5RA,KRT18,MAN1A1,MMP17,MMP24,NMNAT2,OLIG2,PACS1,PCDH19,PDGFD,PRKG1,RAB22A,RAD1,RGS20,SH3RF2,TMEFF1,WNT5A,WNT5B,ZNF217,estrogen receptor	23	33	Cellular Movement, Connective Tissue Development and Function, Cancer
8	hsa-miR-376a-2-5p	ARL4C,ATG5,ATP5I,CREB1,CRTAP,F2RL1,FBXL19,HIGD1A,HM13,KCNIP3,MAU2,MED1,MED13L,MED22,N-cor,NMNAT1,NPR1,PARD6B,PDZD2,PEG10,PLXDC2,PNPO,PRKCA,PRNP,PSEN1,PTPRF,PVR,SCAMP4,SEPT2,SEPT6,STRADA,Secretase gamma,TRPM7,UTP6,VASN	23	33	Cell Death and Survival, Cellular Compromise, Neurological Disease
9	hsa-miR-376a-2-5p	ABCC6,ACKR2,AGK,Aconitase,BCAR3,CD72,ERK1/2,FCMR,FGF19,FXN,GALNT2,HTR4,IDE,ISCA1,ITSN1,LAT2,LRRN1,LYRM4,MC1R,MGRN1,NFS1,NTN1,P2RY2,PACSIN2,RASGRP4,S1PR2,SHC3,SIRT3,SMG1,STON2,TDGF1,TOR1A,UNC119,WNK2,succinate dehydrogenase	21	32	Cellular Development, Cellular Growth and Proliferation, Cellular Assembly and Organization
10	hsa-miR-376a-2-5p	ABCG1,AR,ARCN1,ARMCX2,CAST,CIT,COPA,COPE,DHCR24,ELK4,ERO1A,GDI1,HACE1,INSIG2,LMAN1,LMOD1,LRIG1,MTHFD2,MXI1,Nr1h,PIGA,PIM,PMEPA1,RNF168,SEC16A,SEC16B,SEC22A,SEC24C,TFCP2,TRIP12,UBP1,USP5,VAV3,ZMIZ1,calpain	21	32	Cellular Assembly and Organization, Cellular Function and Maintenance, Infectious Diseases
11	hsa-miR-376a-2-5p	ADGRA2,ATF7IP,ATF7IP2,AXIN2,Alpha catenin,CHMP1A,CHMP1B,DPAGT1,FOXP4,GABPB2,HP1,Histone h3,ING5,KDM4E,KIAA0895,KLHDC10,LARP1B,LEF1,MGMT,MYB,MYT1,NFATC2IP,NKD1,PADI3,PHF8,PSG5,SF3B3,SNUPN,SPATS2L,STAMBP,WLS,WNT3A,WNT8B,ZNF423,ZNF790	21	32	Embryonic Development, Organismal Development, Tissue Development
12	hsa-miR-376a-2-5p	Alpha actin,CDC5L,COQ9,DCBLD2,DCP1A,DNMBP,DSC1,EEF2K,EFNA2,EFNA5,FOXI1,FOXK1,FOXL1,HAUS6,Hsp90,ICE2,IQGAP2,KHDRBS1,KIF5B,KLK7,LUZP1,MAP7,NTM,P-TEFb,PUM1,RAVER1,RBMX,SYNPO,TCF3,TNPO1,TPM1,TPM2,TRIM5,ZBTB7B,ZFAND2A	21	32	Cell Morphology, Cellular Assembly and Organization, Cellular Development
13	hsa-miR-376a-2-5p	ADCY,ARHGAP35,ARRB1,BDNF,CAMK2N1,CTNNAL1,CaMKII,DPYSL2,EIF2AK4,EPO,ERK,G-protein beta,GAB2,GNAI1,GNG2,GNG7,GRK6,HCK,HPSE,KLF10,LASP1,LPIN1,LPP,LTB4R,MKNK2,MNT,NCAM1,OXTR,PLCB2,RGS4,SLC6A3,SNTB2,SOD3,TRA2B,TRIP6	20	31	Cellular Movement, Cell-To-Cell Signaling and Interaction, Inflammatory Response
14	hsa-miR-376a-2-5p	AGTRAP,Ap2 alpha,CLRN1,CLTC,DPH5,EXOC8,FYCO1,HERC1,IGF2R,JAM2,JAM3,LILRB4,MAP1LC3B,MHC CLASS I (family),MPZL1,NFKBIA,PP2A,RALB,RALBP1,SETBP1,SLC12A2,SLC6A14,SNAP23,SNX9,STK38,STK39,STX12,STX16,STX6,TOM1L1,TOM1L2,Ubiquitin,VAMP3,VTI1A,WNK3	20	31	Cellular Assembly and Organization, Cellular Function and Maintenance, Molecular Transport
15	hsa-miR-376a-2-5p	AP3B1,ARHGEF2,ARID5B,AXL,Ap1,CALM1 (includes others),CELF1,CELF2,EIF2B1,EIF2B2,EIF2B3,GM2A,HABP2,MANSC1,MBNL1,Mek,NEDD4,NPLOC4,OCA2,OTUD7B,PADI4,PDGFRA,PI4K2A,PPIC,Ppp2c,RIMS1,SEMA3C,SEMA6A,SERPINE1,SRSF3,Tnf receptor,UBE2J1,UBE3A,USP33,VAMP2	20	31	Hereditary Disorder, Neurological Disease, Organismal Injury and Abnormalities
16	hsa-miR-376a-2-5p	AHCY,CADM1,CASP2,CDK8,CTH,Cyclin B,DHFR,ECT2,FLOT2,GTF2B,GTF2E1,GTF2F1,HEY2,Histone h4,ING2,LHCGR,MARCH8,N4BP2L2,NOTCH2,Notch,PIEZO2,PLEKHO1,PPL,PTPRN2,Rb,SLCO4A1,SMUG1,SMURF1,SND1,SRFBP1,TAF1,TAF2,TAF5,TNFRSF10A,TP73	20	31	Cellular Development, Cellular Growth and Proliferation, Embryonic Development
17	hsa-miR-376a-2-5p	ADAT2,ALDH1B1,APEX1,BDH1,BRD4,CCR1,CDK9,DDX11,DHX33,DNAJB1,DOT1L,ERCC8,GTF3C6,HIST1H2AG,IL12 (family),INA,MLLT1,MTHFD1L,MTMR2,POU2F1,PRPS1,PTPN22,RAD51AP1,RFC2,RNA polymerase II,RNF8,RPS12,RPS4X,Rnr,SLC16A9,SNAPC3,STAU1,TRIM29,WNT7B,c-Src	20	31	Cell Morphology, Embryonic Development, Cancer
18	hsa-miR-376a-2-5p	ACTN4,ARPC4,BMPR1A,CACNA1C,CACNA1D,CLSTN2,COL1A1,CXCL12,EFNB1,EPHB2,EXOSC6,Erm,F2R,FSH,GJC1,GREM1,HAND1,HCN4,KCNJ3,KCNJ5,MYADM,MYOCD,NR2F6,NRP1,PDLIM3,PODXL,PTPN21,SELPLG,SMAD1/5,TMPO,Tgf beta,UPF2,UPF3A,WWP2,YTHDF2	20	31	Cardiovascular Disease, Organismal Injury and Abnormalities, Hereditary Disorder
19	hsa-miR-376a-2-5p	ADRB1,APLNR,Akt,B4GALT5,BCL10,CCR4,CDH13,CHRNA4,CHRNA5,CHRNB4,CSNK1A1,Calcineurin A,EPB41,G protein beta gamma,GDNF,GRB10,HTRA1,IKK (complex),LANCL2,MAGI2,MALT1,MTORC2,MYH11,PDGFRB,PELI3,PIK3R1,PIP5K1C,RBM38,RDH10,SEC14L2,SH3PXD2A,SIGMAR1,SLC22A17,THEM4,UBE2V2	18	30	Organismal Injury and Abnormalities, Gastrointestinal Disease, Psychological Disorders
20	hsa-miR-376a-2-5p	ACO1,ARAP1,ARNT,Alpha tubulin,BYSL,CDCP1,CEMIP,CHKA,CTPS1,Collagen type IV,DARS,DCDC2,DNAJA3,Dynein,FTH1,Ferritin,GOLGA7,HIF1A,HIF3A,HUWE1,IREB2,KIAA1217,KIFC2,MAPKAPK5,NME3,POMK,PROCR,PTGIS,PTK6,RIC8A,RPS3,SLC2A1,Sfk,VHL,ZDHHC9	18	30	Molecular Transport, Auditory Disease, Dermatological Diseases and Conditions
21	hsa-miR-376a-2-5p	14-3-3,ATG14,ATXN1,ATXN7,BACE2,BECN1,CDIPT,CENPB,DPY19L1,DR1,ETFBKMT,FOXO1,Hsp27,Hsp70,IKBKB,JADE2,KDM1A,KDM5B,KLK3,MIA2,MIA3,NSD2,PAX9,PINK1,PP1-C,RBM7,RBPMS,RCOR1,SNAP25,ST13,SUPT3H,TADA3,TOP2A,USP22,mediator	18	30	Cell Morphology, Cellular Function and Maintenance, Embryonic Development
22	hsa-miR-376a-2-5p	AGER,ANXA5,APOL1,ARX,Alp,BMP4,BMPR2,CCNF,DUSP2,ELK1,FBXO31,IGFBP6,IPO13,Jnk,KDELR1,KDELR3,MAP4K4,MYEF2,NFkB (family),P38 MAPK,PYM1,RANBP1,RBM17,RBM8A,RGS18,ROMO1,RS1,SARM1,SP7,SUGP1,Smad1/5/8,TMSB4,TRADD,TRIM27,WNT4	17	29	Developmental Disorder, Embryonic Development, Organismal Development
23	hsa-miR-376a-2-5p	AKT3,CD3G,F5,GBP1,GBP2,GBP4,GCH1,GNLY,GRIA3,HRH2,IFIT1,IFN type 1,IL1,IL12 (complex),IL18BP,Ifn gamma,KIAA0430,MAP3K7,NCK2,NFAT (complex),OASL,PDCD1,POU6F1,RBCK1,SELL,SH2D1A,SLAMF1,SLAMF6,SLC1A5,TAB1,TAB3,TCR,TLE3,TLR3,ZNFX1	17	29	Connective Tissue Disorders, Immunological Disease, Inflammatory Disease
24	hsa-miR-376a-2-5p	ARHGEF6,ASAP2,Alpha Actinin,BCAN,CD4,CTSH,CTTN,DEF6,DLC1,EID2,ENG,F8A1 (includes others),FN1,Focal adhesion kinase,GALNT6,GPIIB-IIIA,GRN,HEXIM1,ITGB3,LOXL2,LRP,MGAT5,MSI2,NCF1,OLR1,PTP4A3,PXN,SMAD3,SRC (family),TES,TGFBR1,TNS3,TNS4,Talin,VEGFC	17	29	Cellular Movement, Cardiovascular System Development and Function, Cancer
25	hsa-miR-376a-2-5p	AEBP2,BCAT2,BDKRB2,CENPA,CHEK1,CHEK2,CORO2A,CPT1A,CRKL,CSNK1G1,Caspase 3/7,Cbp/p300,F3,Hdac,ING1,LAMC1,LMO4,MECP2,MMS22L,NASP,NCOR1,NDRG4,NFIC,OVOL1,PPM1D,Pkc(s),RBBP4,RBBP8,SAP130,SIAH2,SIN3A,SLC12A5,Sos,Top2,ZBTB7A	17	29	Cell Cycle, DNA Replication, Recombination, and Repair, Gene Expression
My Lists
My Lists	-log(p-value)	Ratio	Molecules
Tox Lists
Ingenuity Toxicity Lists	-log(p-value)	Ratio	Molecules
Cardiac Hypertrophy	2.48	0.218	ADORA2A,PTEN,KLF15,NCF1,MYLK3,NFKBIA,F2R,DICER1,BMP4,JARID2,NOS3,ESR1,AKAP1,ALOX15,HDAC5,RCAN1,HEXIM1,PRKG1,IKBKB,CASR,TIMP2,BMPR2,EPO,LMCD1,DNAJC3,APOB,CABIN1,SERPINE1,MYOCD,CXCL12,HCK,NPR1,CPT1A,CAMK2D,MTHFR,IL6,FXN,IL11,FN1,ECE1,ITGB3,TPM1,NT5E,PTGES,CACNA1D,ADRA1A,VAV3,PLCB1,MAP3K7,MNT,PLIN5,HEY2,MYL2,ADRB1,AGXT,PPP3CB,CDK9,MBNL1,MEF2C,IGF2R,CHGA,PRKCA,PBX1,HIF1A,CACNA1C,SP3,VDR,TAB1,FNIP1,LE…
Hypoxia-Inducible Factor Signaling	2.31	0.29	UBE2J1,CREB1,UBE2H,PXN,IKBKB,EIF2B3,PIK3R1,EIF1,TP53,UBE2G1,VHL,EPO,PRKCA,UBE2I,HIF1A,EIF2B1,PLCG1,ARNT,NOS3,EIF2B2
Renal Glomerulus Panel (Human)	1.37	0.353	SYNPO,CDKN1A,DDN,PODXL,PDPN,PLA2R1
Increases Liver Hyperplasia/Hyperproliferation	1.33	0.226	PEG10,F2RL1,CENPA,LTA,FGF19,IKBKB,HPN,IL6,ITGA9,AKT2,TP53,RRM2,IL11,PRNP,CDKN1B,VCAN,HIF1A,HSPA5,MET,SDR9C7,LEP,MGAT3,FAS,TLR2
Increases Liver Steatosis	1.29	0.231	MOGAT2,SREBF1,C3,SIK3,NPC1L1,ABCG1,IKBKB,DGAT1,G0S2,CNR2,KLF2,NR2C2,LPIN1,TSC22D3,RPTOR,CRTC3,HSD17B13,ARNT,ATP5A1,TLR2,ACOT11
Increases Cardiac Dilation	1.14	0.263	EPO,F2R,IL17RA,TBX20,PRKCA,NCF1,CAST,RXRA,CAMK2D,FOSL1
PPARα/RXRα Activation	1.01	0.2	PLCB2,MRAS,CYP2C19,IL6,NFKBIA,NR2C2,IL1R1,GHR,SMAD3,IL1RL2,RXRA,ADCY2,NCOR1,TGFBR1,CHD5,PRKAR2A,PLCB1,SLC27A1,MAP3K7,MAP4K4,PLCB4,MED1,HSP90B1,INSR,IKBKB,MEF2C,ACVR1B,BMPR2,GK,PRKCA,APOA1,PLCG1,ADCY9,PRKAB2
Cell Cycle: G2/M DNA Damage Checkpoint Regulation	0.973	0.235	TOP2A,PPM1D,YWHAG,CHEK2,MYT1,PTPMT1,CDKN1A,TRIP12,RPS6KA1,TP53,CCNB1,CHEK1
Liver Proliferation	0.97	0.193	S1PR2,CXCL12,ERCC1,PTEN,F2RL1,C3,TNFRSF1A,NCF1,FGF19,COL1A1,PIK3R1,IL6,NFKBIA,TP53,DICER1,BMP4,DLC1,SMAD3,CDKN1A,MET,RXRA,ARNT,ITGB3,NCOR1,IQGAP2,F2,WNT3A,SLC7A5,CSF2RB,MED1,LTA,INSR,IKBKB,CASR,CERS2,TIMP2,EPO,LTB4R,CDKN1B,CIT,XBP1,LEP,MGAT3,FAS
Increases Liver Damage	0.959	0.205	HCK,PTEN,C3,TNFRSF1A,NCF1,CD40,IL6,FAAH,IL1R1,CDKN1A,MET,TLR2,F2,RACK1,MED1,LTA,IKBKB,PDCD1,CERS2,PTPN1,PYCARD,GCSH,XBP1,SERPINE1,FAS,DDR2
Protection from Hypoxia-induced Renal Ischemic Injury (Rat)	0.908	0.5	EPO,SLC2A1
Increases Liver Hepatitis	0.88	0.217	RACK1,TNFRSF1A,LTA,IKBKB,CNR2,IL6,GCSH,IL17RA,IL1R1,TLR3,LATS2,LEP,SERPINE1,FAS,ESR1
Long-term Renal Injury Pro-oxidative Response Panel (Rat)	0.846	0.308	NCF1,HIF3A,FMO3,FMO2
Cardiac Fibrosis	0.828	0.19	CREB1,NPR1,KLF15,NCF1,LIMS2,MYLK3,SNAI1,FN1,DICER1,PNPLA2,SMAD3,COQ9,NOS3,TLR2,CAPNS1,VAV3,SGCB,HEY2,HEXIM1,ADRB1,PRKG1,NECTIN2,MBNL1,CNR2,PDCD1,BECN1,AR,BMPR1A,EPO,SLC2A4,TIMP3,CACNA1C,TEAD1,APOA1,F3,VDR,SERPINE1,NDUFS6
Irreversible Glomerulonephritis Biomarker Panel (Rat)	0.785	0.333	LAMC1,COL1A1,MRE11
Increases Glomerular Injury	0.719	0.203	AGER,PDGFRB,F2RL1,SREBF1,C3,CCR1,B2M,TP53,CCL22,BMP4,CDKN1B,GHR,SMAD3,CDKN1A,NOS3,TLR2
Increases Damage of Mitochondria	0.682	0.3	AR,GNLY,FAS
Liver Necrosis/Cell Death	0.676	0.179	AGER,C3,TNFRSF1A,NCF1,SELL,VSIR,NFKBIA,FAAH,DICER1,SMAD3,RXRA,ARNT,IQGAP2,ESR1,DUSP4,MED1,IKBKB,FGL2,TRADD,PTPN1,AR,EPO,IL17RA,LATS2,CDKN1B,ATF7,SERPINE1,FAS,VASN,CTH,RBCK1,HRH2,ERCC1,PIK3R1,CD40,IL6,NR2C2,TP53,LDLR,CDKN1A,MET,ITGB3,MNT,TNFSF14,TRIM27,PDCD1,CERS2,TNFRSF10A,CIT,TIMP3,XBP1,F3
Increases Cardiac Proliferation	0.671	0.213	BMPR1A,TBX20,PRKCA,DICER1,HEY2,RXRA,LEP,IL6,AKIP1,CASZ1
NF-κB Signaling	0.658	0.184	AKT3,TNFRSF1A,MRAS,TIRAP,IL36B,PIK3R1,CD40,NFKBIA,MALT1,IL1R1,BCL10,BMP4,GHR,TGFBR1,TLR6,TNFRSF11A,TLR2,TANK,MAP3K7,PDGFRB,MAP4K4,TAB3,PDGFRA,CD3G,LTA,INSR,IKBKB,TRADD,AKT2,IGF2R,BMPR1A,BMPR2,TLR3,TAB1
Pro-Apoptosis	0.651	0.214	ERCC2,TNFRSF10A,TNFRSF1A,TNFSF14,FAS,TRADD,CASP2,ACIN1,TP53
Increases Depolarization of Mitochondria and Mitochondrial Membrane	0.606	0.25	BTG2,PRNP,CACNA2D2,TP53
LPS/IL-1 Mediated Inhibition of RXR Function	0.578	0.178	FABP3,TNFRSF1A,CPT1A,IL36B,CYP3A4,CYP2C19,NR5A2,FMO2,ACSL6,MGMT,ALDH1A2,IL1R1,ALDH3B1,ALDH1L2,IL1RL2,RXRA,ALDH1B1,CHST1,FMO3,CHST14,MAOA,SLC27A1,HS3ST3B1,MAP3K7,CHST3,HS6ST3,ALDH3B2,NDST3,SREBF1,FABP4,ABCG1,UST,ACSL4,SOD3,FABP1,CHST7,GSTM4,NDST4,HS3ST1
Increases Heart Failure	0.515	0.217	PRKCA,ADRB1,CAMK2D,FOXO1,FOSL1
Decreases Permeability Transition of Mitochondria and Mitochondrial Membrane	0.504	0.286	BTG2,HSPA5
Aryl Hydrocarbon Receptor Signaling	0.486	0.177	CHEK2,MCM7,NQO2,CYP3A4,CYP2C19,IL6,TP53,NFIC,ALDH1A2,DHFR,ALDH3B1,ALDH1L2,CDKN1A,RXRA,ARNT,ALDH1B1,ESR1,ALDH3B2,AHRR,MED1,HSP90B1,CDKN1B,TP73,GSTM4,FAS,CHEK1
Mechanism of Gene Regulation by Peroxisome Proliferators via PPARα	0.473	0.181	MAP3K7,PDGFRB,PDGFRA,TNFRSF1A,MED1,INSR,IKBKB,PIK3R1,NFKBIA,FABP1,IL1R1,PRKCA,RXRA,APOA1,TAB1,NCOR1,PRKAR2A
VDR/RXR Activation	0.455	0.182	GTF2B,IL12A,MED1,CASR,THBD,PRKCA,CDKN1B,CDKN1A,YY1,RXRA,VDR,NCOR1,FOXO1,IGFBP6
TGF-β Signaling	0.432	0.178	MAP3K7,MRAS,ACVR1B,BMPR1A,BMPR2,BMP4,SMAD3,TGIF1,RUNX3,ZNF423,VDR,TAB1,PMEPA1,SERPINE1,TGFBR1,SMURF1
Hormone Receptor Regulated Cholesterol Metabolism	0.425	0.25	LDLR,RXRA
Persistent Renal Ischemia-Reperfusion Injury (Mouse)	0.39	0.192	CTSS,LYZ,C3,C1QB,COL1A1
Anti-Apoptosis	0.387	0.188	NAIP,BAG5,BFAR,SPHK2,BAG1,TNFAIP8
Increases Renal Damage	0.369	0.173	POU2F1,HCK,F2RL1,SREBF1,C3,CCR1,B2M,IL6,TP53,IL1R1,BMP4,C5AR1,FUT4,TLR2
PXR/RXR Activation	0.364	0.175	CES3,AKT3,CPT1A,RXRA,INSR,CYP3A4,CYP2C19,IL6,FOXO1,AKT2,PRKAR2A
Hepatic Stellate Cell Activation	0.3	0.171	PDGFRB,PDGFRA,TGFBR1,CD40,IL6,KLF2
Decreases Depolarization of Mitochondria and Mitochondrial Membrane	0.294	0.172	SH3GLB1,PAK1,CDKN1A,COL1A1,FAS
p53 Signaling	0.269	0.161	PTEN,AKT3,CHEK2,MED1,ST13,PIK3R1,AKT2,TP53,PERP,TNFRSF10A,TRIM29,HIF1A,CDKN1A,TP73,FAS,GML,TIGAR,CHEK1
Primary Glomerulonephritis Biomarker Panel (Human)	0.262	0.182	COL1A1,SERPINE1
Reversible Glomerulonephritis Biomarker Panel (Rat)	0.258	0.167	HNMT,TAP2,HSPBAP1,GREM1
Cytochrome P450 Panel - Substrate is an Eicosanoid (Mouse)	0.234	0.2	PTGIS
Renal Safety Biomarker Panel (PSTC)	0.187	0.167	B2M
My Pathways
My Pathways	-log(p-value)	Ratio	Molecules
Analysis Ready Molecules
ID	Symbol
AADACL3	AADACL3
AADAT	AADAT
ABCA10	ABCA10
ABCA13	ABCA13
ABCA5	ABCA5
ABCA8	ABCA8
ABCA9	ABCA9
ABCC11	ABCC11
ABCC12	ABCC12
ABCC6	ABCC6
ABCF3	ABCF3
ABCG1	ABCG1
ABHD11	ABHD11
ABHD13	ABHD13
ABHD4	ABHD4
ABT1	ABT1
ABTB2	ABTB2
ACADSB	ACADSB
ACIN1	ACIN1
ACKR2	ACKR2
ACLY	ACLY
ACO1	ACO1
ACOT11	ACOT11
ACP2	ACP2
ACRBP	ACRBP
ACSL4	ACSL4
ACSL6	ACSL6
ACTN4	ACTN4
ACTR10	ACTR10
ACTR1A	ACTR1A
ACTR1B	ACTR1B
ACTR8	ACTR8
ACVR1B	ACVR1B
ADAMTS10	ADAMTS10
ADAMTS15	ADAMTS15
ADAMTS19	ADAMTS19
ADAMTS3	ADAMTS3
ADAP2	ADAP2
ADARB1	ADARB1
ADARB2	ADARB2
ADAT2	ADAT2
ADCY2	ADCY2
ADCY9	ADCY9
ADD3-AS1	ADD3-AS1
ADGRA2	ADGRA2
ADGRF2	ADGRF2
ADGRF3	ADGRF3
ADGRG5	ADGRG5
ADGRV1	ADGRV1
ADH6	ADH6
ADORA2A	ADORA2A
ADORA2B	ADORA2B
ADRA1A	ADRA1A
ADRA2B	ADRA2B
ADRB1	ADRB1
AEBP2	AEBP2
AEN	AEN
AFAP1	AFAP1
AGAP3	AGAP3
AGBL5	AGBL5
AGER	AGER
AGK	AGK
AGMO	AGMO
AGTRAP	AGTRAP
AGXT	AGXT
AHCY	AHCY
AHNAK2	AHNAK2
AHRR	AHRR
AICDA	AICDA
AIFM2	AIFM2
AIG1	AIG1
AJAP1	AJAP1
AK5	AK5
AK9	AK9
AKAP1	AKAP1
AKAP10	AKAP10
AKAP8	AKAP8
AKIP1	AKIP1
AKNA	AKNA
AKR1C2	AKR1C1/AKR1C2
AKR1D1	AKR1D1
AKT2	AKT2
AKT3	AKT3
ALCAM	ALCAM
ALDH1A2	ALDH1A2
ALDH1B1	ALDH1B1
ALDH1L2	ALDH1L2
ALDH3B1	ALDH3B1
ALDH3B2	ALDH3B2
ALG11	ALG11
ALG12	ALG12
ALG2	ALG2
ALG9	ALG9
ALKBH5	ALKBH5
ALOX15	ALOX15
ALPK1	ALPK1
AMER1	AMER1
AMER3	AMER3
AMFR	AMFR
AMIGO1	AMIGO1
AMIGO3	AMIGO3
AMMECR1	AMMECR1
AMN	AMN
AMOT	AMOT
AMOTL2	AMOTL2
ANAPC1	ANAPC1
ANAPC16	ANAPC16
ANGEL2	ANGEL2
ANGPT4	ANGPT4
ANGPTL1	ANGPTL1
ANK2	ANK2
ANKDD1A	ANKDD1A
ANKHD1	ANKHD1/ANKHD1-EIF4EBP3
ANKLE1	ANKLE1
ANKRD16	ANKRD16
ANKRD17	ANKRD17
ANKRD18A	ANKRD18A
ANKRD22	ANKRD22
ANKRD33	ANKRD33
ANKRD40	ANKRD40
ANKRD52	ANKRD52
ANKS4B	ANKS4B
ANO1	ANO1
ANO6	ANO6
ANOS1	ANOS1
ANP32E	ANP32E
ANXA11	ANXA11
ANXA5	ANXA5
AOC3	AOC3
AOX1	AOX1
AP2M1	AP2M1
AP3B1	AP3B1
AP4B1	AP4B1
AP5M1	AP5M1
AP5Z1	AP5Z1
APEX1	APEX1
APLNR	APLNR
APOA1	APOA1
APOB	APOB
APOBEC3C	APOBEC3C
APOBEC3D	APOBEC3D
APOBEC3F	APOBEC3F
APOC3	APOC3
APOL1	APOL1
APOL2	APOL2
APOL4	APOL4
AQP9	AQP9
AR	AR
ARAP1	ARAP1
ARCN1	ARCN1
ARFGEF1	ARFGEF1
ARFGEF2	ARFGEF2
ARG2	ARG2
ARHGAP1	ARHGAP1
ARHGAP17	ARHGAP17
ARHGAP22	ARHGAP22
ARHGAP31	ARHGAP31
ARHGAP35	ARHGAP35
ARHGAP44	ARHGAP44
ARHGEF10	ARHGEF10
ARHGEF15	ARHGEF15
ARHGEF18	ARHGEF18
ARHGEF2	ARHGEF2
ARHGEF26	ARHGEF26
ARHGEF6	ARHGEF6
ARHGEF9	ARHGEF9
ARID1B	ARID1B
ARID2	ARID2
ARID5A	ARID5A
ARID5B	ARID5B
ARIH1	ARIH1
ARL15	ARL15
ARL2BP	ARL2BP
ARL4C	ARL4C
ARL5A	ARL5A
ARL5C	ARL5C
ARL9	ARL9
ARMC5	ARMC5
ARMCX2	ARMCX2
ARMCX6	ARMCX6
ARNT	ARNT
ARNT2	ARNT2
ARPC4	ARPC4
ARPC5	ARPC5
ARPC5L	ARPC5L
ARRB1	ARRB1
ARRDC2	ARRDC2
ARSA	ARSA
ARSD	ARSD
ARSE	ARSE
ART3	ART3
ARX	ARX
AS3MT	AS3MT
ASAP2	ASAP2
ASB12	ASB12
ASB16	ASB16
ASB5	ASB5
ASXL1	ASXL1
ASXL2	ASXL2
ASXL3	ASXL3
ATAD1	ATAD1
ATAD3C	ATAD3C
ATF7	ATF7
ATF7IP	ATF7IP
ATF7IP2	ATF7IP2
ATG14	ATG14
ATG2B	ATG2B
ATG5	ATG5
ATIC	ATIC
ATL2	ATL2
ATP10A	ATP10A
ATP10D	ATP10D
ATP2B2	ATP2B2
ATP5A1	ATP5A1
ATP5G1	ATP5G1
ATP5I	ATP5I
ATP5S	ATP5S
ATP6AP1L	ATP6AP1L
ATP6V0D2	ATP6V0D2
ATP6V1C1	ATP6V1C1
ATP6V1C2	ATP6V1C2
ATP8B3	ATP8B3
ATP9A	ATP9A
ATPAF2	ATPAF2
ATRN	ATRN
ATXN1	ATXN1
ATXN7	ATXN7
ATXN7L1	ATXN7L1
AVIL	AVIL
AXIN2	AXIN2
AXL	AXL
AZGP1	AZGP1
AZIN1-AS1	AZIN1-AS1
B2M	B2M
B4GALT5	B4GALT5
B4GALT7	B4GALT7
B9D2	B9D2
BACE2	BACE2
BAG1	BAG1
BAG5	BAG5
BATF3	BATF3
BAZ1B	BAZ1B
BBOF1	BBOF1
BCAM	BCAM
BCAN	BCAN
BCAR3	BCAR3
BCAS4	BCAS4
BCAT2	BCAT2
BCKDK	BCKDK
BCL10	BCL10
BCL2L15	BCL2L15
BCL7A	BCL7A
BCLAF1	BCLAF1
BCOR	BCOR
BDH1	BDH1
BDH2	BDH2
BDKRB2	BDKRB2
BDNF	BDNF
BECN1	BECN1
BEND2	BEND2
BEST3	BEST3
BFAR	BFAR
BHLHA15	BHLHA15
BICD2	BICD2
BLACE	BLACE
BLOC1S2	BLOC1S2
BLOC1S3	BLOC1S3
BLOC1S4	BLOC1S4
BMP1	BMP1
BMP4	BMP4
BMP8A	BMP8A
BMPR1A	BMPR1A
BMPR2	BMPR2
BNC2	BNC2
BOLL	BOLL
BORCS8-MEF2B	BORCS8-MEF2B
BRD4	BRD4
BRPF3	BRPF3
BSPRY	BSPRY
BTBD2	BTBD2
BTG2	BTG2
BTG4	BTG4
BTN1A1	BTN1A1
BTN3A1	BTN3A1
BYSL	BYSL
BZW1	BZW1
BZW2	BZW2
C10orf105	C10orf105
C10orf53	C10orf53
C10orf76	C10orf76
C11orf44	C11orf44
C11orf45	C11orf45
C11orf52	C11orf52
C11orf54	C11orf54
C11orf57	C11orf57
C11orf84	C11orf84
C11orf96	C11orf96
C11orf98	C11orf98
C12orf49	C12orf49
C12orf56	C12orf56
C12orf74	C12orf74
C12orf76	C12orf76
C14orf180	C14orf180
C14orf2	C14orf2
C15orf40	C15orf40
C16orf45	C16orf45
C16orf47	C16orf47
C16orf52	C16orf52
C16orf70	C16orf70
C16orf87	C16orf87
C16orf89	C16orf89
C16orf95	C16orf95
C17orf105	C17orf105
C17orf74	C17orf74
C17orf75	C17orf75
C17orf78	C17orf78
C18orf32	C18orf32
C19orf24	C19orf24
C19orf44	C19orf44
C19orf48	C19orf48
C19orf54	C19orf54
C1orf106	C1orf106
C1orf116	C1orf116
C1orf210	C1orf210
C1orf50	C1orf50
C1orf61	C1orf61
C1QB	C1QB
C1QL3	C1QL3
C1QTNF3	C1QTNF3
C1QTNF6	C1QTNF6
C1QTNF8	C1QTNF8
C1S	C1S
C20orf144	C20orf144
C20orf194	C20orf194
C21orf33	C21orf33/LOC102724023
C21orf58	C21orf58
C21orf59	C21orf59
C21orf62	C21orf62
C21orf62-AS1	C21orf62-AS1
C22orf23	C22orf23
C22orf29	C22orf29
C22orf34	C22orf34
C2CD3	C2CD3
C2CD4B	C2CD4B
C2orf15	C2orf15
C2orf61	C2orf61
C2orf69	C2orf69
C2orf71	C2orf71
C2orf91	C2orf91
C3	C3
C3orf67	C3orf67
C4orf45	C4orf45
C4orf50	C4orf50
C5AR1	C5AR1
C5AR2	C5AR2
C5orf15	C5orf15
C5orf22	C5orf22
C5orf47	C5orf47
C6orf132	C6orf132
C6orf201	C6orf201
C6orf222	C6orf222
C6orf223	C6orf223
C7orf73	C7orf73
C8orf46	C8orf46
C9orf170	C9orf170
C9orf3	C9orf3
C9orf47	C9orf47
C9orf66	C9orf66
C9orf69	C9orf69
C9orf84	C9orf84
CA5B	CA5B
CA8	CA8
CAB39L	CAB39L
CABIN1	CABIN1
CABLES1	CABLES1
CABP7	CABP7
CABYR	CABYR
CACNA1B	CACNA1B
CACNA1C	CACNA1C
CACNA1D	CACNA1D
CACNA1E	CACNA1E
CACNA1I	CACNA1I
CACNA2D2	CACNA2D2
CACNG3	CACNG3
CACNG4	CACNG4
CAD	CAD
CADM1	CADM1
CALB2	CALB2
CALCOCO2	CALCOCO2
CALD1	CALD1
CALHM1	CALHM1
CALM3	CALM1 (includes others)
CALN1	CALN1
CAMK2D	CAMK2D
CAMK2N1	CAMK2N1
CAMKK1	CAMKK1
CAMKK2	CAMKK2
CAMKMT	CAMKMT
CAMSAP1	CAMSAP1
CAMTA1	CAMTA1
CANX	CANX
CAPN12	CAPN12
CAPN5	CAPN5
CAPN6	CAPN6
CAPN7	CAPN7
CAPN8	CAPN8
CAPNS1	CAPNS1
CARHSP1	CARHSP1
CARMIL3	CARMIL3
CASC10	CASC10
CASKIN1	CASKIN1
CASP16P	CASP16P
CASP2	CASP2
CASP5	CASP5
CASR	CASR
CASS4	CASS4
CAST	CAST
CASZ1	CASZ1
CBARP	CBARP
CBLN2	CBLN2
CBR1	CBR1
CC2D1B	CC2D1B
CCDC107	CCDC107
CCDC113	CCDC113
CCDC115	CCDC115
CCDC120	CCDC120
CCDC121	CCDC121
CCDC122	CCDC122
CCDC126	CCDC126
CCDC127	CCDC127
CCDC152	CCDC152
CCDC155	CCDC155
CCDC177	CCDC177
CCDC179	CCDC179
CCDC189	CCDC189
CCDC25	CCDC25
CCDC30	CCDC30
CCDC38	CCDC38
CCDC40	CCDC40
CCDC68	CCDC68
CCDC71L	CCDC71L
CCDC73	CCDC73
CCDC77	CCDC77
CCDC85C	CCDC85C
CCDC88C	CCDC88C
CCL1	CCL1
[truncated: 2,812 more rows]

[truncated: 12 more sheets: Table S10, Table S11, Table S12, Table S13, Table S14, Table S15, Table S16, Table S17, Table S18, Table S19, Table S20, Table S21]
